# Supplementary material for: Cascade hydroarylation/Diels–Alder cycloaddition of alkynylindoles with electron-deficient alkynes and alkenes
Source: Royal Society of Chemistry journal article supplement (doi:10.1039/d3cc05210a), 2023-12-04
Supplement: d3cc05210a1.pdf [file d3cc05210a1.pdf]

# Supporting Information

## Cascade Hydroarylation/Diels–Alder Cycloaddition of Alkynylindoles with Electron-Deficient Alkynes and Alkenes

Guang-Chao Feng,<sup>‡a</sup> Jun-Chi Li,<sup>‡a</sup> Xiang Huang,<sup>a</sup> Ji-Kai Liu,<sup>a</sup> Bin Wu<sup>a</sup> and  
Jin-Ming Yang<sup>\*a</sup>

<sup>a</sup>School of Pharmaceutical Sciences, South-Central Minzu University, Wuhan 430074,  
People's Republic of China. E-mail: [jmyang@scuec.edu.cn](mailto:jmyang@scuec.edu.cn).

<sup>‡</sup>G.-C. F. and J.-C.L. contributed equally to this work.

## CONTENTS

|                                                                         |     |
|-------------------------------------------------------------------------|-----|
| 1. General Information.....                                             | 1   |
| 2. Experimental Section.....                                            | 2   |
| 2.1 Preparation of <b>2</b> .....                                       | 2   |
| 2.2 Optimization of Reaction Conditions. ....                           | 3   |
| 3. Synthesis of Compounds <b>1a-1w</b> , <b>2d</b> .....                | 8   |
| 4. General Procedure B for the Synthesis of <b>3</b> and <b>5</b> ..... | 52  |
| 5. General Procedure for the Synthesis of <b>6</b> .....                | 118 |
| 5.1 General Procedure C for <b>6a-f</b> .....                           | 118 |
| 5.2 The Synthesis of <b>6g-h</b> .....                                  | 130 |
| 6. Scale-up Reaction Procedure.....                                     | 134 |
| 7. Control Experiments.....                                             | 135 |
| 8. X-ray Crystal Data of Compound <b>5k</b> .....                       | 141 |
| 9. References.....                                                      | 142 |

## 1. General Information

Unless otherwise stated, all reactions were performed in sealed tube (capacity 15 mL). Commercially available reagents were used without further purification. NMR spectra were recorded on Bruker Avance NEO 500 or Bruker Avance III 600 instruments and calibrated using residual solvent peaks as internal reference. Chemical shifts ( $\delta$ ) were expressed in ppm with reference to the solvent signals. Coupling constants  $J$  are given in Hz. High-resolution mass spectra (HRMS) were obtained using electrospray ionization (ESI) [quantitative time-of-flight (Q-TOF)] ionization sources on an Agilent 6200 Q-TOF MS. Infrared (IR) spectra were obtained with a Tenor 27 spectrophotometer using KBr pellets. Melting points were determined on a SGW X-4A melting point apparatus. X-ray diffraction was obtained by Bruker D8 QUEST. TLC analyses were performed on commercial glass plates bearing 0.25-mm layer of Merck Silica gel GF254. Silica gel (Huanghai 300 – 400 mesh) was used for flash column chromatography.

## 2. Experimental Section

### 2.1 Preparation of 2 and 4

Substrate **2a-c**, **4a-n** were purchased and 1,4-diphenylbut-2-yne **2d** were synthesized from commercially available benzylacetylene and benzyl bromide followed by literature report.

List of substrates **2** and **4**:

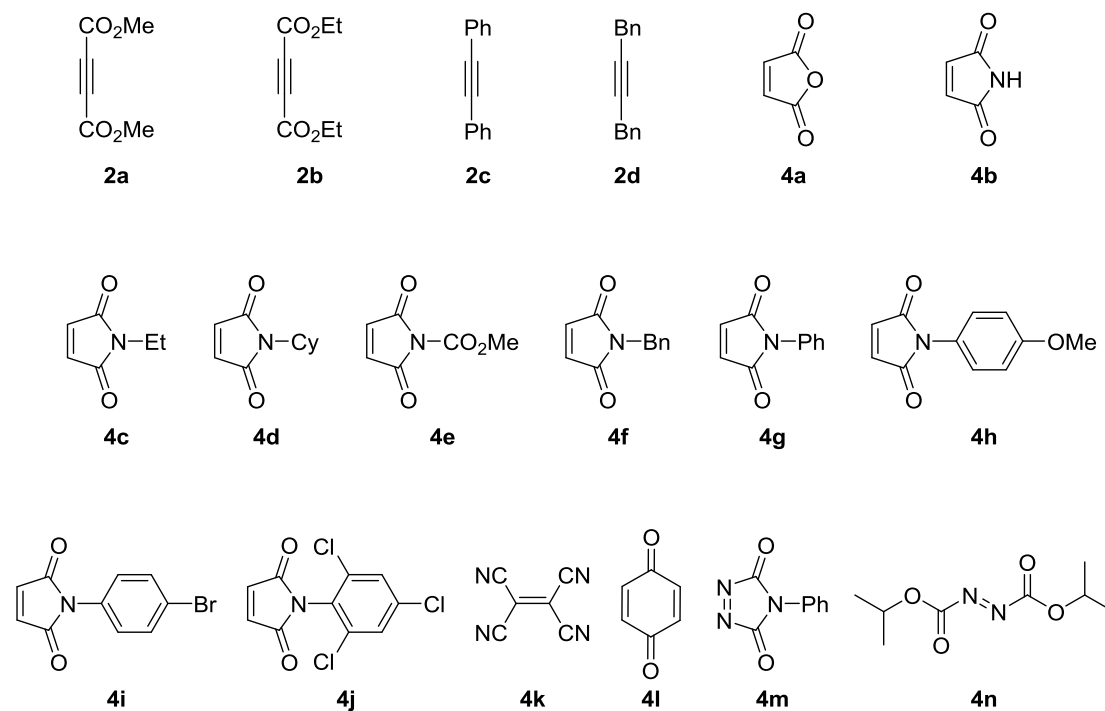



## 2.2 Optimization of Reaction Conditions.

**Table S1:** Selected Examples of the Optimizations.

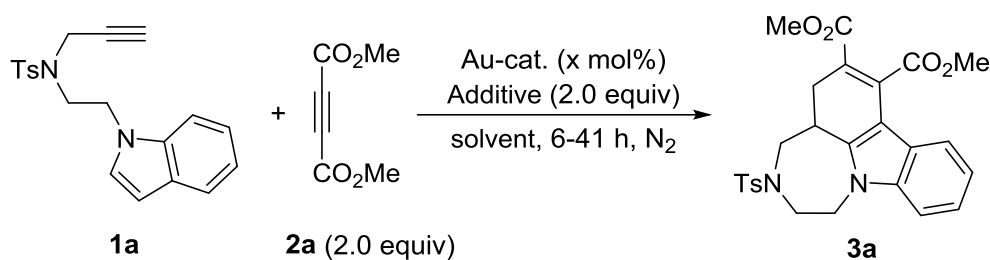

| entry           | catalyst (0.5 mol%)                    | additive           | solvent | time (h) | temp. (°C) | yield <sup>b</sup> (%) |
|-----------------|----------------------------------------|--------------------|---------|----------|------------|------------------------|
| 1               | <sup>t</sup> BuXPhosAuNTf <sub>2</sub> | -                  | toluene | 9        | 80         | (46)                   |
| 2               | <sup>t</sup> BuXPhosAuNTf <sub>2</sub> | -                  | toluene | 9        | 100        | (45)                   |
| 3               | <sup>t</sup> BuXPhosAuNTf <sub>2</sub> | -                  | toluene | 9        | 120        | (69)                   |
| 4               | <sup>t</sup> BuXPhosAuNTf <sub>2</sub> | -                  | toluene | 9        | 150        | (46)                   |
| 5               | <sup>t</sup> BuXPhosAuNTf <sub>2</sub> | -                  | PhCl    | 5        | 120        | 74 (72)                |
| 6               | <sup>t</sup> BuXPhosAuNTf <sub>2</sub> | -                  | PhF     | 7        | 120        | (70)                   |
| 7               | XPhosAuNTf <sub>2</sub>                | -                  | PhCl    | 10       | 120        | 69                     |
| 8               | JohnPhosAu(MeCN)SbF <sub>6</sub>       | -                  | PhCl    | 10       | 120        | 57                     |
| 9               | AuCl <sub>3</sub>                      | -                  | PhCl    | 5        | 120        | NR                     |
| 10 <sup>c</sup> | <sup>t</sup> BuXPhosAuNTf <sub>2</sub> | -                  | PhCl    | 7        | 120        | (56)                   |
| 11              | <sup>t</sup> BuXPhosAuNTf <sub>2</sub> | Ac <sub>2</sub> O  | PhCl    | 9        | 120        | 78                     |
| 12              | <sup>t</sup> BuXPhosAuNTf <sub>2</sub> | Piv <sub>2</sub> O | PhCl    | 9        | 120        | 78                     |
| 13              | <sup>t</sup> BuXPhosAuNTf <sub>2</sub> | Boc <sub>2</sub> O | PhCl    | 6        | 120        | 78 (75)                |
| 14              | -                                      | Boc <sub>2</sub> O | PhCl    | 12       | 120        | NR                     |

<sup>a</sup>Reaction conditions: **1a** (0.1 mmol), **2a** (0.2 mmol), catalyst (0.5 mol%), additive (0.2 mmol), dry solvent (0.1 M) under N<sub>2</sub>. <sup>b</sup>Yields were determined by <sup>1</sup>H NMR using 1,3,5-trimethoxybenzene as the internal standard. Isolated yields were given in parentheses. <sup>c</sup>1.0 mol% of catalyst. NR = no reaction.

**Table S2:** Optimization of the Reaction Conditions.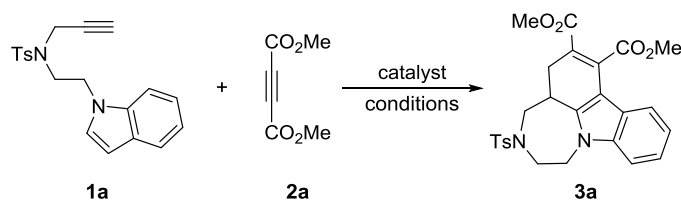

| Entry           | Catalyst                                    | Solvent           | Additive                    | T (°C)     | Yield (%) <sup>b</sup> |
|-----------------|---------------------------------------------|-------------------|-----------------------------|------------|------------------------|
| 1               | <sup>t</sup> BuXPhosAuNTf <sub>2</sub>      | toluene           | –                           | 80         | (46)                   |
| 2               | <sup>t</sup> BuXPhosAuNTf <sub>2</sub>      | toluene           | –                           | 100        | (45)                   |
| 3               | <sup>t</sup> BuXPhosAuNTf <sub>2</sub>      | toluene           | –                           | 110        | (61)                   |
| 4               | <sup>t</sup> BuXPhosAuNTf <sub>2</sub>      | toluene           | –                           | 120        | (69)                   |
| 5               | <sup>t</sup> BuXPhosAuNTf <sub>2</sub>      | toluene           | –                           | 150        | (46)                   |
| <b>6</b>        | <b><sup>t</sup>BuXPhosAuNTf<sub>2</sub></b> | <b>PhCl</b>       | –                           | <b>120</b> | <b>74 (72)</b>         |
| 7               | <sup>t</sup> BuXPhosAuNTf <sub>2</sub>      | PhCF <sub>3</sub> | –                           | 120        | (50)                   |
| 8               | <sup>t</sup> BuXPhosAuNTf <sub>2</sub>      | PhF               | –                           | 120        | (70)                   |
| 9               | <sup>t</sup> BuXPhosAuNTf <sub>2</sub>      | HFIP              | –                           | 120        | 67                     |
| 10              | <sup>t</sup> BuXPhosAuNTf <sub>2</sub>      | Xylene            | –                           | 150        | 17                     |
| 11              | XPhosAuNTf <sub>2</sub>                     | PhCl              | –                           | 120        | 69                     |
| 12              | JohnPhosAu(MeCN)SbF <sub>6</sub>            | PhCl              | –                           | 120        | 57                     |
| 13              | JohnPhosAuCl                                | PhCl              | –                           | 120        | trace                  |
| 14              | DTBPAuCl + AgSbF <sub>6</sub>               | PhCl              | –                           | 120        | 9                      |
| 15              | PPh <sub>3</sub> AuCl + AgSbF <sub>6</sub>  | PhCl              | –                           | 120        | 0                      |
| 16              | AuCl <sub>3</sub>                           | PhCl              | –                           | 120        | NR                     |
| 17 <sup>c</sup> | <sup>t</sup> BuXPhosAuNTf <sub>2</sub>      | PhCl              | –                           | 120        | (56)                   |
| 18 <sup>d</sup> | <sup>t</sup> BuXPhosAuNTf <sub>2</sub>      | PhCl              | –                           | 120        | 50                     |
| 19 <sup>e</sup> | <sup>t</sup> BuXPhosAuNTf <sub>2</sub>      | PhCl              | –                           | 120        | 72                     |
| 20              | <sup>t</sup> BuXPhosAuNTf <sub>2</sub>      | PhCl              | Ac <sub>2</sub> O (2.0 eq)  | 120        | 78                     |
| 21              | <sup>t</sup> BuXPhosAuNTf <sub>2</sub>      | PhCl              | Piv <sub>2</sub> O (2.0 eq) | 120        | 78                     |
| 22              | <sup>t</sup> BuXPhosAuNTf <sub>2</sub>      | PhCl              | Boc <sub>2</sub> O (2.0 eq) | 120        | 78 (75)                |
| 23              | <sup>t</sup> BuXPhosAuNTf <sub>2</sub>      | PhCl              | Boc <sub>2</sub> O (1.0 eq) | 120        | 74                     |
| 24              | <sup>t</sup> BuXPhosAuNTf <sub>2</sub>      | PhCl              | Boc <sub>2</sub> O (4.0 eq) | 120        | 69                     |
| 25 <sup>f</sup> | <sup>t</sup> BuXPhosAuNTf <sub>2</sub>      | PhCl              | Boc <sub>2</sub> O (2.0 eq) | 120        | 61                     |
| 26 <sup>g</sup> | <sup>t</sup> BuXPhosAuNTf <sub>2</sub>      | PhCl              | Boc <sub>2</sub> O (2.0 eq) | 120        | 54                     |
| 27              | –                                           | PhCl              | Boc <sub>2</sub> O (2.0 eq) | 120        | NR                     |

<sup>a</sup>Reaction conditions: **1a** (0.1 mmol), **2a** (0.2 mmol), catalyst (0.5 mol%), additive (0.2 mmol), dry solvent (0.1 M) under N<sub>2</sub> for 5–34 h. <sup>b</sup>The yields were determined by <sup>1</sup>H NMR using 1,3,5-trimethoxybenzene as the internal standard, and the isolated yields were given in parentheses. <sup>c</sup>1.0 mol% of <sup>t</sup>BuXPhosAuNTf<sub>2</sub>. <sup>d</sup>under the oxygen. <sup>e</sup>Under the air. <sup>f</sup>1.0 equiv of **2a**. <sup>g</sup>3.0 equiv of **2a**. NR = no reaction.

**Table S3:** Screening of Temperature.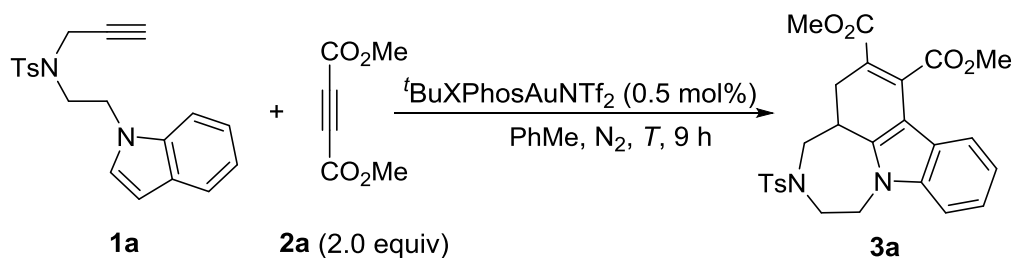

| Entry | T (°C) | Yield <sup>a</sup> (%) |
|-------|--------|------------------------|
| 1     | 80     | 46                     |
| 2     | 100    | 45                     |
| 3     | 110    | 61                     |
| 4     | 120    | 69                     |
| 5     | 150    | 46                     |

<sup>a</sup>Isolated yield.

**Table S4:** Screening of Solvents.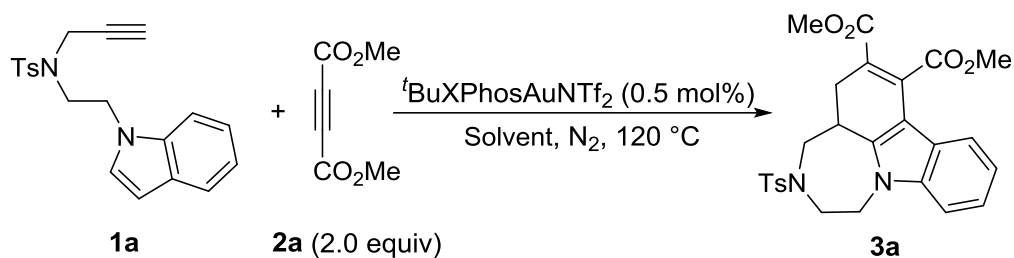

| Entry | Solvent           | Time (h) | Yield <sup>a</sup> (%) |
|-------|-------------------|----------|------------------------|
| 1     | toluene           | 9        | (69)                   |
| 2     | PhCl              | 5        | (72)                   |
| 3     | PhCF <sub>3</sub> | 16       | (50)                   |
| 4     | PhF               | 7        | (70)                   |
| 5     | HFIP              | 9        | 67                     |
| 6     | Xylene            | 9        | 17                     |

<sup>a</sup>The yields were determined by <sup>1</sup>H NMR using 1,3,5-trimethoxybenzene as the internal standard, and the isolated yields were given in parentheses.

**Table S5:** Screening of Catalyst.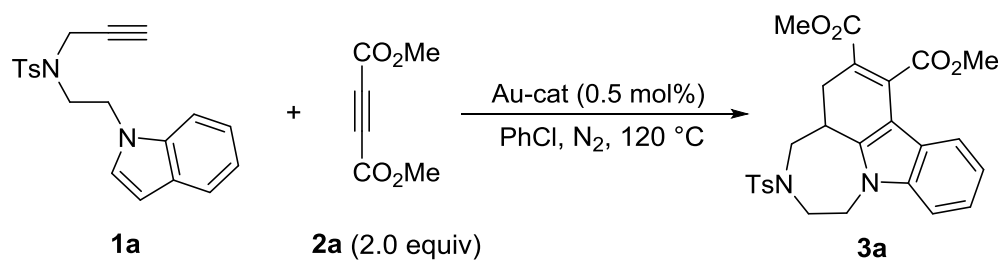

| Entry | Catalyst                                   | Time (h) | Yield <sup>a</sup> (%) |
|-------|--------------------------------------------|----------|------------------------|
| 1     | <sup>t</sup> BuXPhosAuNTf <sub>2</sub>     | 5        | 74                     |
| 2     | XPhosAuNTf <sub>2</sub>                    | 10       | 69                     |
| 3     | JohnPhosAu(MeCN)SbF <sub>6</sub>           | 10       | 57                     |
| 4     | JohnPhosAuCl                               | 34       | trace                  |
| 5     | DTBPAuCl + AgSbF <sub>6</sub>              | 10       | 9                      |
| 6     | PPh <sub>3</sub> AuCl + AgSbF <sub>6</sub> | 12       | 0                      |
| 7     | AuCl <sub>3</sub>                          | 5        | NR                     |

<sup>a</sup>The yields were determined by <sup>1</sup>H NMR using 1,3,5-trimethoxybenzene as the internal standard. NR = no reaction.

**Table S6:** Screening of the Catalyst Loading.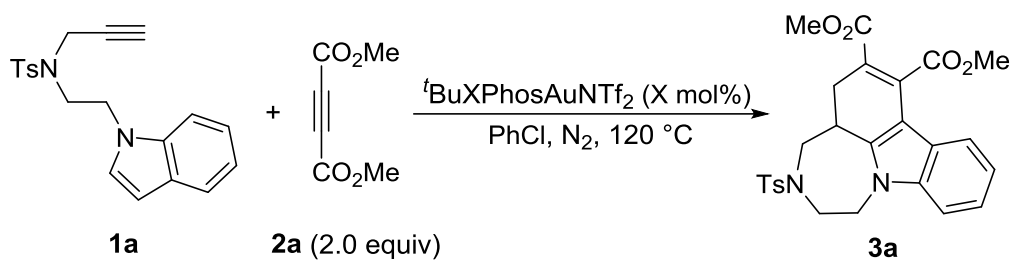

| Entry | X mol% | Time (h) | Yield <sup>a</sup> (%) |
|-------|--------|----------|------------------------|
| 1     | 0.5    | 5        | 72                     |
| 2     | 1.0    | 7        | 56                     |

<sup>a</sup>Isolated yields.**Table S7:** Screening of Atmosphere.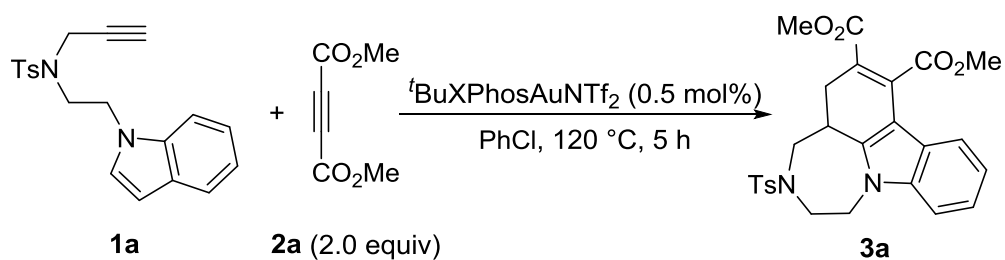

| Entry | Atmosphere     | Yield <sup>a</sup> (%) |
|-------|----------------|------------------------|
| 1     | N <sub>2</sub> | 74                     |
| 2     | O <sub>2</sub> | 50                     |
| 3     | Air            | 72                     |

<sup>a</sup>The yields were determined by <sup>1</sup>H NMR using 1,3,5-trimethoxybenzene as the internal standard.

**Table S8:** Screening of Additives.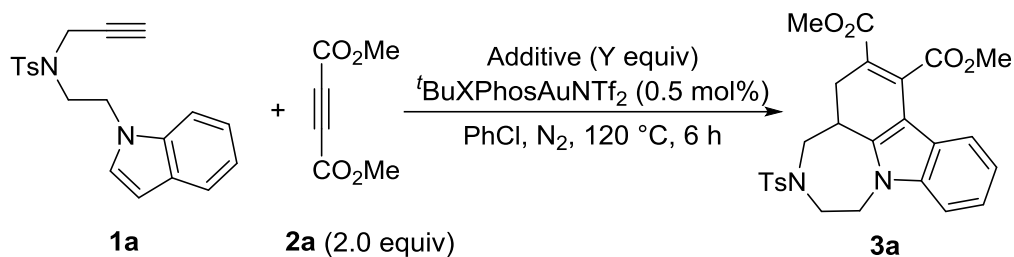

| Entry | Additive           | Y equiv | Yield <sup>a</sup> (%) |
|-------|--------------------|---------|------------------------|
| 1     | –                  | –       | 74                     |
| 2     | Ac <sub>2</sub> O  | 2.0     | 78                     |
| 3     | Piv <sub>2</sub> O | 2.0     | 78                     |
| 4     | Boc <sub>2</sub> O | 2.0     | 78                     |
| 5     | Boc <sub>2</sub> O | 1.0     | 74                     |
| 6     | Boc <sub>2</sub> O | 4.0     | 69                     |

<sup>a</sup>The yields were determined by <sup>1</sup>H NMR using 1,3,5-trimethoxybenzene as the internal standard.

**Table S9:** Screening of the Equivalent of **2a**.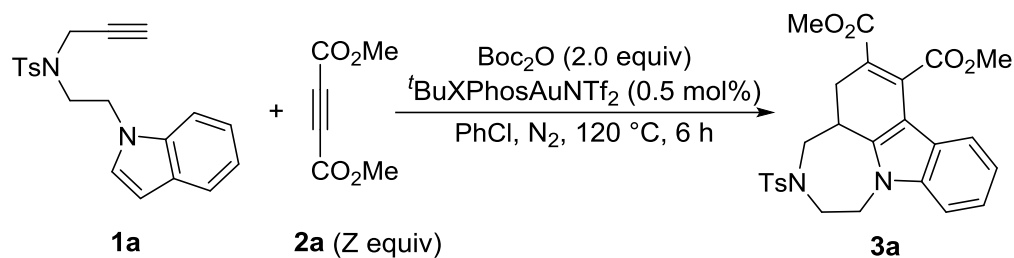

| Entry | Z (equiv) | Yield <sup>a</sup> (%) |
|-------|-----------|------------------------|
| 1     | 1.0       | 61                     |
| 2     | 2.0       | 78                     |
| 3     | 3.0       | 54                     |

<sup>a</sup>The yields were determined by <sup>1</sup>H NMR using 1,3,5-trimethoxybenzene as the internal standard.

### 3. Synthesis of Compounds 1a-1w, 2d

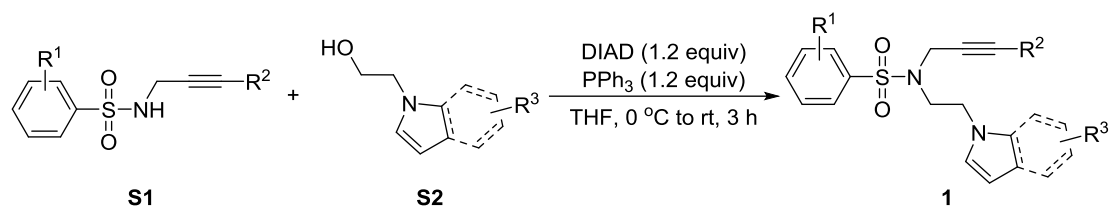

**General Procedure A:** To a round-bottom flask were added **S1** (1.0 equiv),  $\text{PPh}_3$  (1.2 equiv) in THF. The mixture was cooled to 0 °C before diisopropylazodicarboxylate (DIAD) (1.2 equiv) was added dropwise. Then, corresponding **S2** (1.2 equiv) was added to the mixture. Then, the ice-water bath was removed and the mixture was naturally warmed up to room temperature. After stirred at room temperature for 3 h, the mixture was concentrated under vacuum and purified by flash column chromatography using petroleum ether/ethyl acetate as eluent to give the corresponding **1a-1r, 1v**.

#### *N*-(2-(1*H*-indol-1-yl)ethyl)-4-methyl-*N*-(prop-2-yn-1-yl)benzenesulfonamide (**1a**)

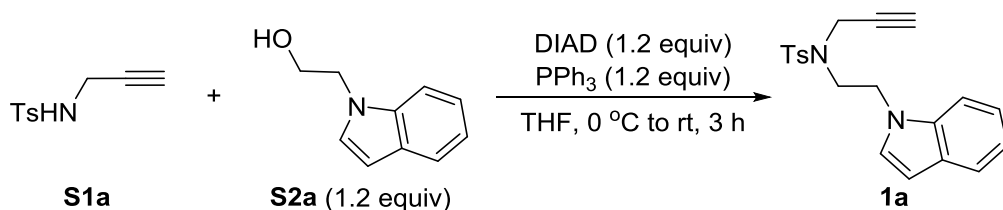

The compound **1a** (yellow solid, 935.9 mg, 82% yield) was obtained following General Procedure A from **S1a** (675.4 mg, 3.23 mmol, 1.0 equiv) and **S2a** (624.8 mg, 3.88 mmol, 1.2 equiv) using  $\text{PPh}_3$  (1.02 g, 3.88 mmol, 1.2 equiv) and DIAD (0.76 mL, 3.88 mmol, 1.2 equiv) after purification by flash column chromatography using petroleum ether/ethyl acetate = 8/1 ( $R_f$  = 0.26) as eluent.

**$^1\text{H NMR}$**  (500 MHz,  $\text{CDCl}_3$ , TMS)  $\delta$  7.69 (dt,  $J$  = 8.5, 2.0 Hz, 2H), 7.62 (d,  $J$  = 7.5 Hz, 1H), 7.41 (dd,  $J$  = 8.0, 1.0 Hz, 1H), 7.25 (d,  $J$  = 8.0 Hz, 2H), 7.23-7.20 (m, 1H), 7.13-7.09 (m, 2H), 6.50 (dd,  $J$  = 3.0, 1.0 Hz, 1H), 4.43 (t,  $J$  = 7.0 Hz, 2H), 3.81 (d,  $J$  = 2.5 Hz, 2H), 3.50 (t,  $J$  = 7.0 Hz, 2H), 2.39 (s, 3H), 2.02 (t,  $J$  = 2.5 Hz, 1H).

**$^{13}\text{C NMR}$**  (125 MHz,  $\text{CDCl}_3$ )  $\delta$  144.0, 135.9, 135.4, 129.8, 128.8, 128.0, 127.7, 122.0, 121.2, 119.8, 109.3, 102.1, 76.8, 74.1, 46.6, 46.0, 38.4, 21.7.

IR (KBr)  $\nu(\text{cm}^{-1})$ : 3262, 1631, 1597, 1344, 1320, 1161, 1103, 740  $\text{cm}^{-1}$ .

HRMS (ESI): calcd for  $\text{C}_{20}\text{H}_{21}\text{N}_2\text{O}_2\text{S}$   $[\text{M}+\text{H}]^+$ : 353.13183, found: 353.13181.

MP: 79-81  $^{\circ}\text{C}$ .

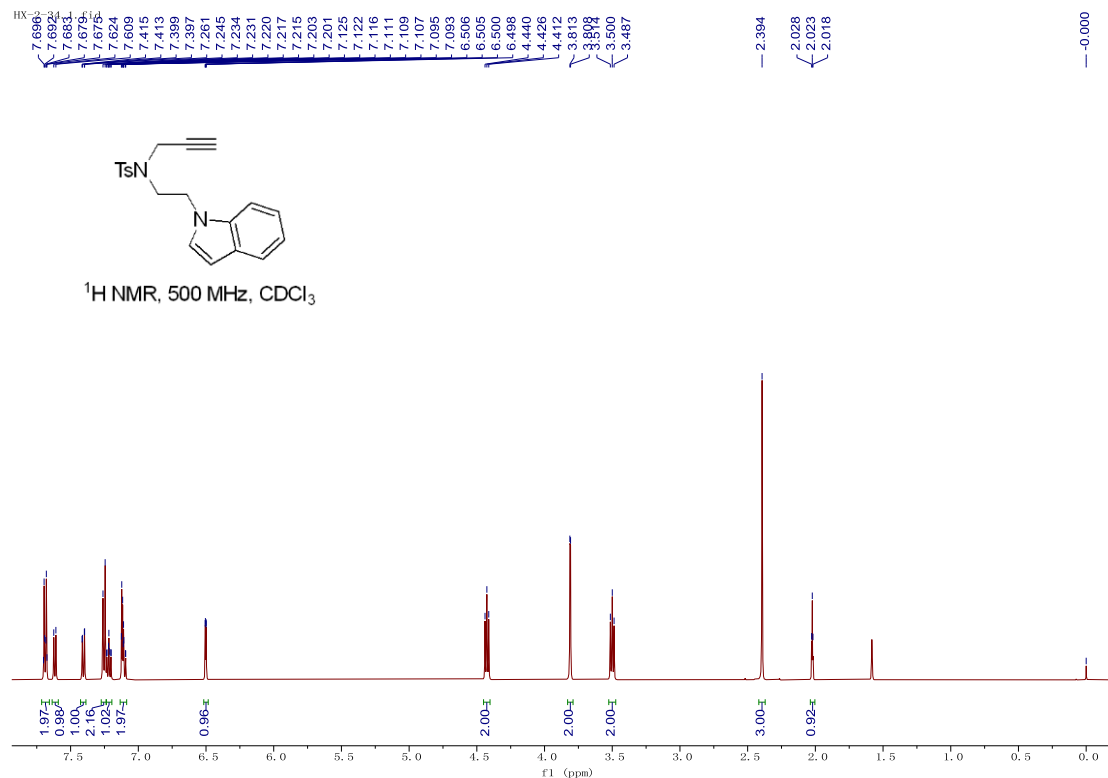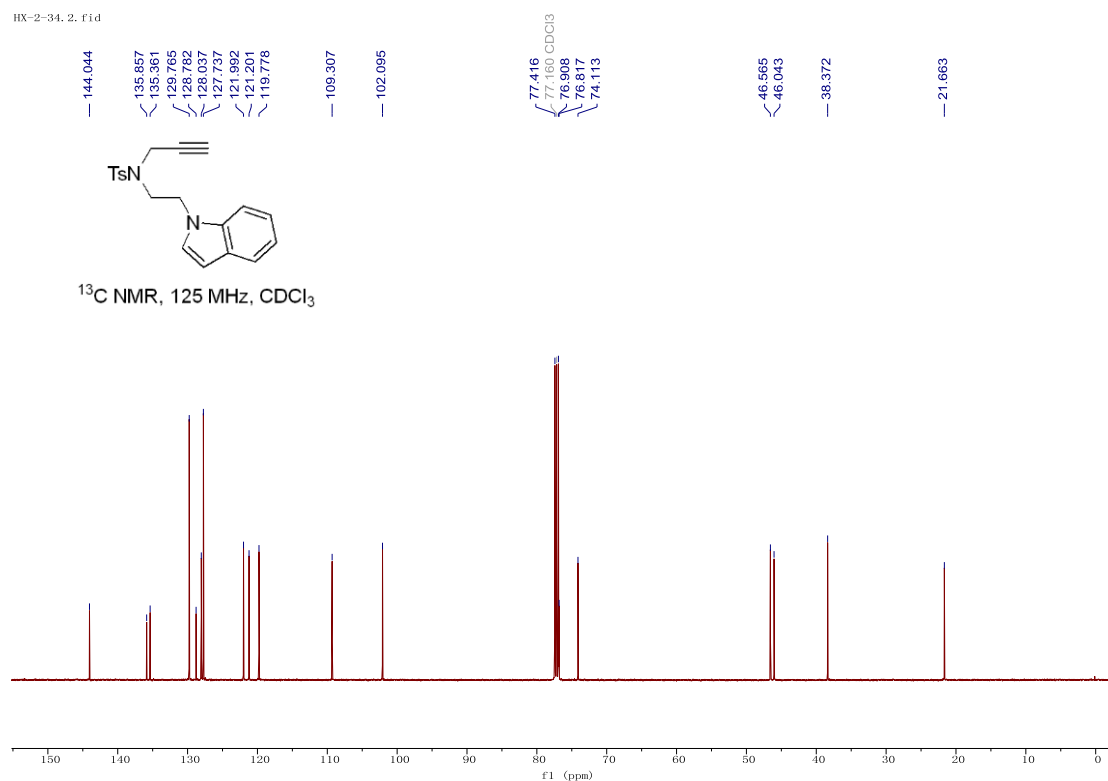

***N*-(2-(1*H*-indol-1-yl)ethyl)-*N*-(prop-2-yn-1-yl)benzenesulfonamide (**1b**)**

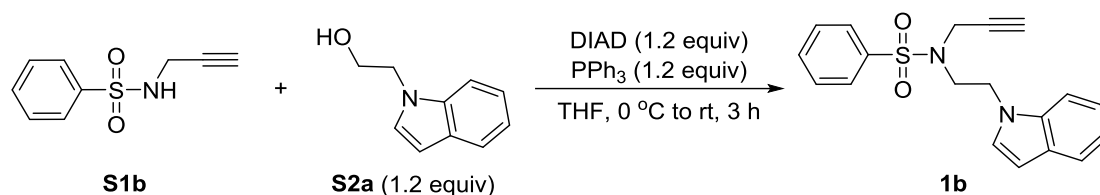

The compound **1b** (white solid, 810.8 mg, 97% yield) was obtained following General Procedure A from **S1b** (482.7 mg, 2.47 mmol, 1.0 equiv) and **S2a** (477.2 mg, 2.96 mmol, 1.2 equiv) using PPh<sub>3</sub> (777.5 mg, 2.96 mmol, 1.2 equiv) and DIAD (0.58 mL, 2.96 mmol, 1.2 equiv) after purification by flash column chromatography using petroleum ether/ethyl acetate = 8/1 (*R<sub>f</sub>* = 0.21) as eluent.

**<sup>1</sup>H NMR** (500 MHz, CDCl<sub>3</sub>, TMS)  $\delta$  7.80 (d, *J* = 8.0 Hz, 2H), 7.61 (d, *J* = 7.5 Hz, 1H), 7.54 (tt, *J* = 7.5, 1.5 Hz, 1H), 7.47-7.43 (m, 2H), 7.40 (d, *J* = 8.5 Hz, 1H), 7.21 (t, *J* = 7.5 Hz, 1H), 7.12-7.09 (m, 2H), 6.50 (d, *J* = 3.0 Hz, 1H), 4.41 (t, *J* = 7.0 Hz, 2H), 3.79 (d, *J* = 2.5 Hz, 2H), 3.51 (t, *J* = 7.0 Hz, 2H), 1.99-1.98 (m, 1H).

**<sup>13</sup>C NMR** (125 MHz, CDCl<sub>3</sub>)  $\delta$  138.3, 135.8, 133.1, 129.1, 128.7, 128.0, 127.6, 122.0, 121.2, 119.8, 109.3, 102.1, 76.6, 74.1, 46.5, 46.0, 38.3.

**IR** (KBr)  $\nu$  (cm<sup>-1</sup>): 3253, 1737, 1690, 1526, 1386, 1258, 1165, 1109, 927, 741 cm<sup>-1</sup>.

**HRMS** (ESI): calcd for C<sub>19</sub>H<sub>18</sub>N<sub>2</sub>NaO<sub>2</sub>S [M+Na]<sup>+</sup>: 361.09812, found: 361.09811.

**MP**: 82-85 °C.



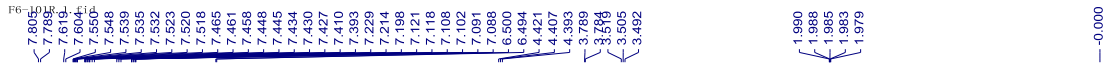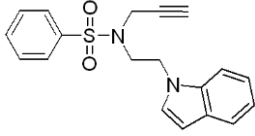

<sup>1</sup>H NMR, 500 MHz, CDCl<sub>3</sub>

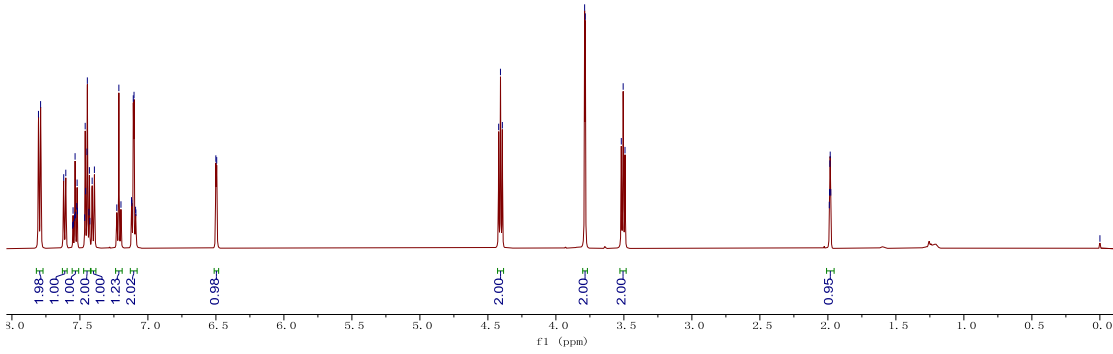

F6-101R. 2. f1d

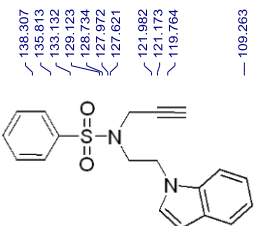

<sup>13</sup>C NMR, 125 MHz, CDCl<sub>3</sub>

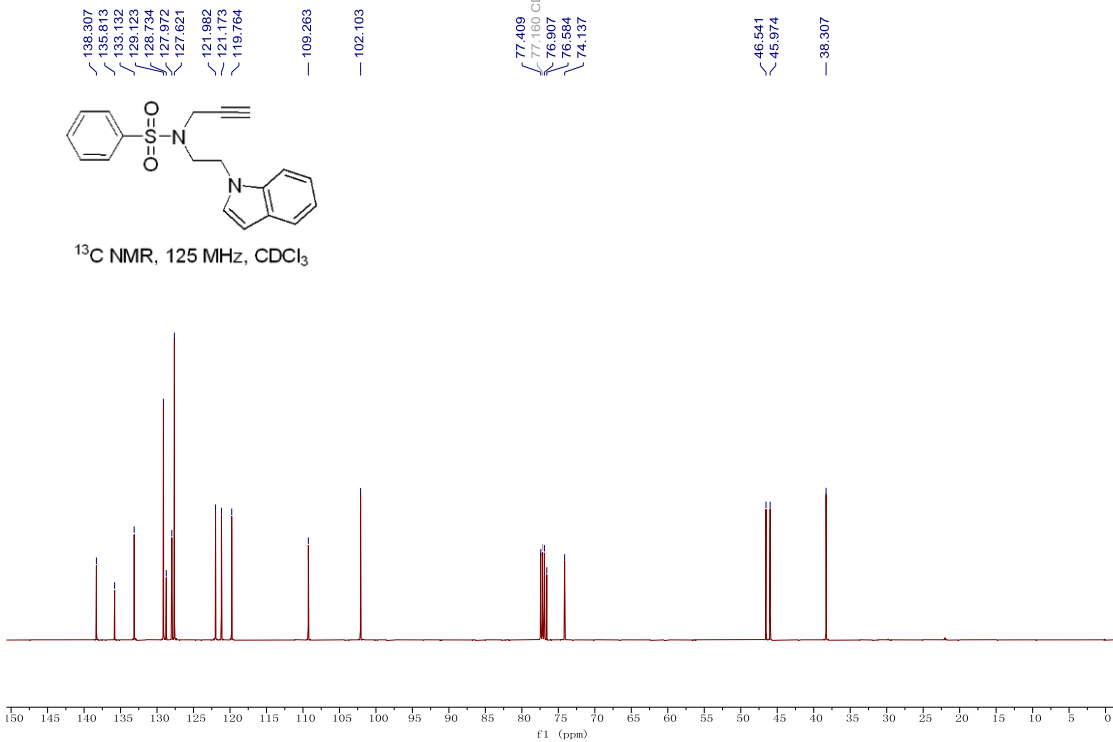

***N*-2-(1*H*-indol-1-yl)ethyl)-2,4,6-trimethyl-*N*-(prop-2-yn-1-yl)benzenesulfonamide (**1c**)**

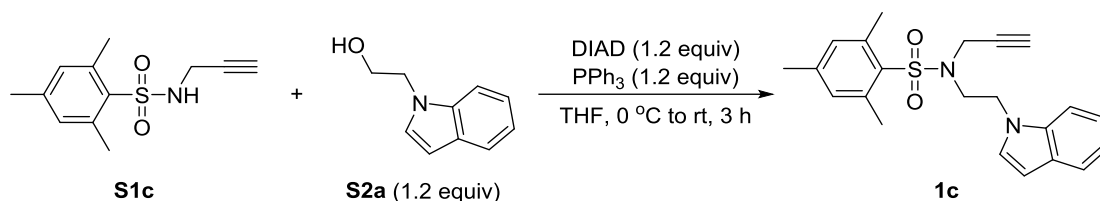

The compound **1c** (yellow oil, 291.0 mg, 76% yield) was obtained following General Procedure A from **S1c** (237.1 mg, 1.0 mmol, 1.0 equiv) and **S2a** (193.4 mg, 1.2 mmol, 1.2 equiv) using PPh<sub>3</sub> (314.8 mg, 1.2 mmol, 1.2 equiv) and DIAD (0.24 mL, 1.2 mmol, 1.2 equiv) after purification by flash column chromatography using petroleum ether/ethyl acetate = 8/1 (*R<sub>f</sub>* = 0.29) as eluent.

**<sup>1</sup>H NMR** (500 MHz, CDCl<sub>3</sub>, TMS)  $\delta$  7.57 (dt, *J* = 8.0, 1.0 Hz, 1H), 7.18-7.12 (m, 2H), 7.09-7.06 (m, 1H), 6.98 (d, *J* = 3.0 Hz, 1H), 6.86 (s, 2H), 6.44 (dd, *J* = 3.0, 1.0 Hz, 1H), 4.30 (t, *J* = 7.0 Hz, 2H), 3.93 (d, *J* = 2.5 Hz, 2H), 3.63 (t, *J* = 7.0 Hz, 2H), 2.53 (s, 6H), 2.28 (t, *J* = 2.5 Hz, 1H), 2.27 (s, 3H).

**<sup>13</sup>C NMR** (125 MHz, CDCl<sub>3</sub>)  $\delta$  143.2, 140.4, 135.6, 132.2, 131.8, 128.8, 127.8, 121.8, 121.1, 119.7, 109.0, 102.0, 77.5, 74.0, 45.5, 44.5, 36.0, 22.9, 21.1.

**IR** (KBr)  $\nu$  (cm<sup>-1</sup>): 3280, 2938, 1604, 1464, 1319, 1155, 742, 654 cm<sup>-1</sup>.

**HRMS** (ESI): calcd for C<sub>22</sub>H<sub>25</sub>N<sub>2</sub>O<sub>2</sub>S [M+H]<sup>+</sup>: 381.16313, found: 381.16299.

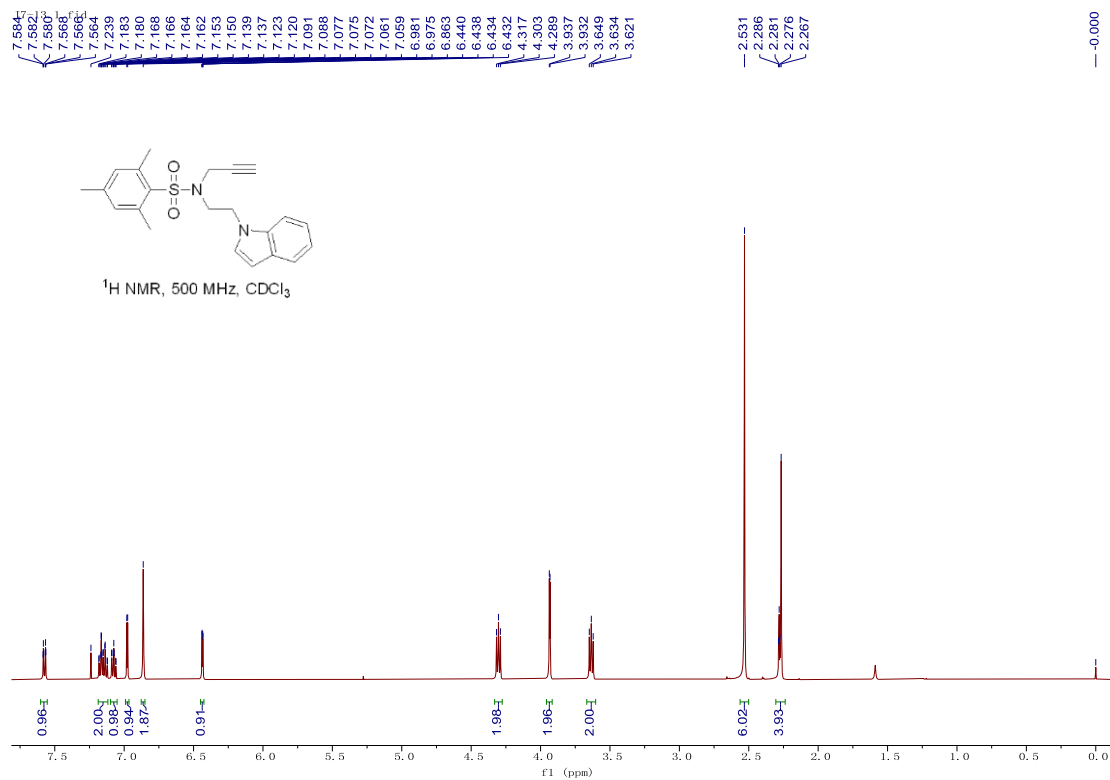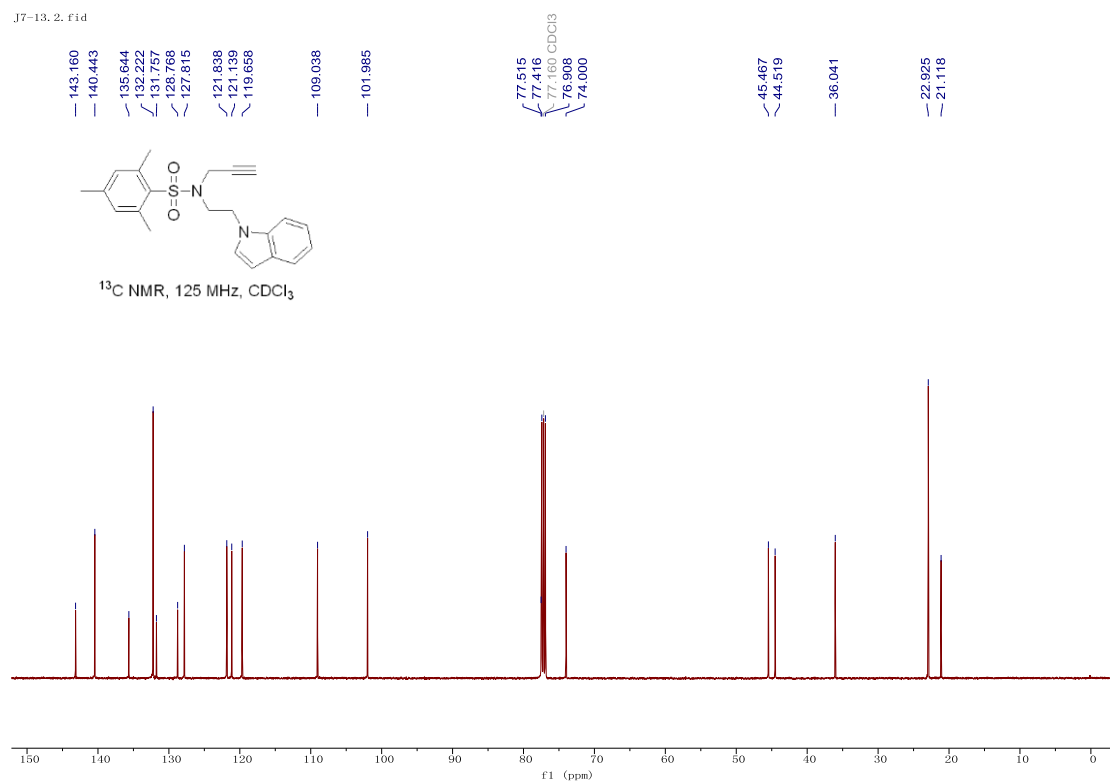

***N*-(2-(1*H*-indol-1-yl)ethyl)-2,4,6-triisopropyl-*N*-(prop-2-yn-1-yl)benzenesulfonamide (**1d**)**

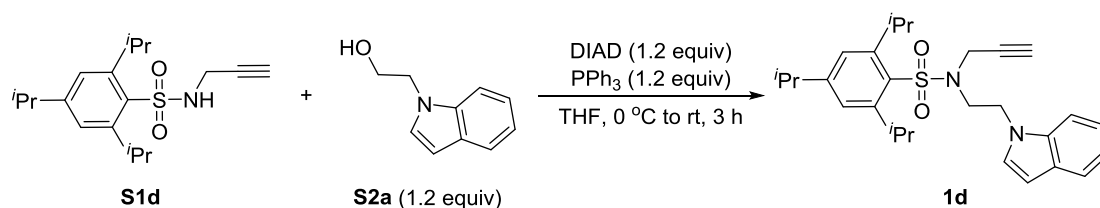

The compound **1d** (yellow solid, 238.0 mg, 74% yield) was obtained following General Procedure A from **S1d** (221.8 mg, 0.69 mmol, 1.0 equiv) and **S2a** (133.8 mg, 0.83 mmol, 1.2 equiv) using PPh<sub>3</sub> (217.7 mg, 0.83 mmol, 1.2 equiv) and DIAD (0.16 mL, 0.83 mmol, 1.2 equiv) after purification by flash column chromatography using petroleum ether/ethyl acetate = 15/1 ( $R_f$  = 0.32) as eluent.

**<sup>1</sup>H NMR** (500 MHz, CDCl<sub>3</sub>, TMS)  $\delta$  7.60 (d,  $J$  = 7.5 Hz, 1H), 7.26 (d,  $J$  = 8.0 Hz, 1H), 7.19-7.15 (m, 3H), 7.10-7.06 (m, 2H), 6.48 (d,  $J$  = 3.0 Hz, 1H), 4.41 (t,  $J$  = 7.5 Hz, 2H), 4.12-4.07 (m, 2H), 3.93 (s, 2H), 3.68 (t,  $J$  = 7.5 Hz, 2H), 2.93-2.88 (m, 1H), 2.29 (s, 1H), 1.26-1.24 (m, 18H).

**<sup>13</sup>C NMR** (125 MHz, CDCl<sub>3</sub>)  $\delta$  153.9, 151.9, 135.8, 130.2, 128.7, 127.8, 124.2, 121.9, 121.1, 119.7, 109.2, 102.0, 77.5, 74.2, 45.3, 44.5, 36.4, 34.3, 29.5, 24.9, 23.6.

**IR** (KBr)  $\nu$  (cm<sup>-1</sup>): 3304, 2960, 1464, 1361, 1314, 1299, 1254, 1149, 911, 744 cm<sup>-1</sup>.

**HRMS** (ESI): calcd for C<sub>28</sub>H<sub>37</sub>N<sub>2</sub>O<sub>2</sub>S [M+H]<sup>+</sup>: 465.25703, found: 465.25702.

**MP**: 96-99 °C.

J7-14.1.fid

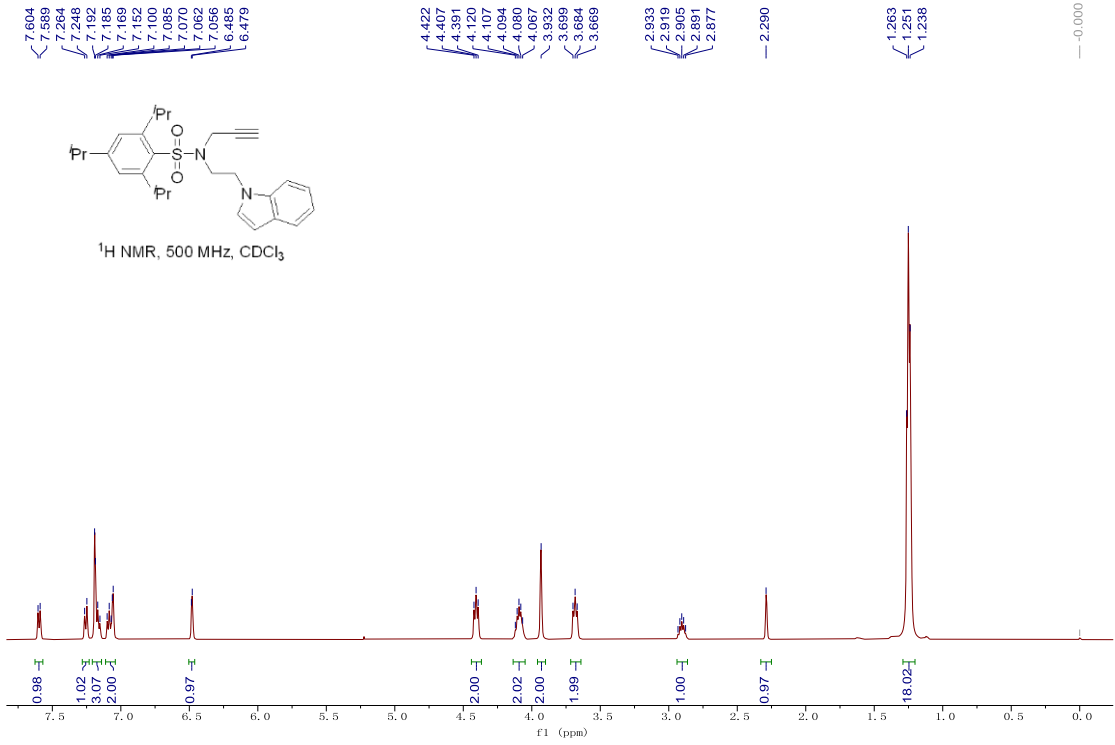

J7-14.2.fid

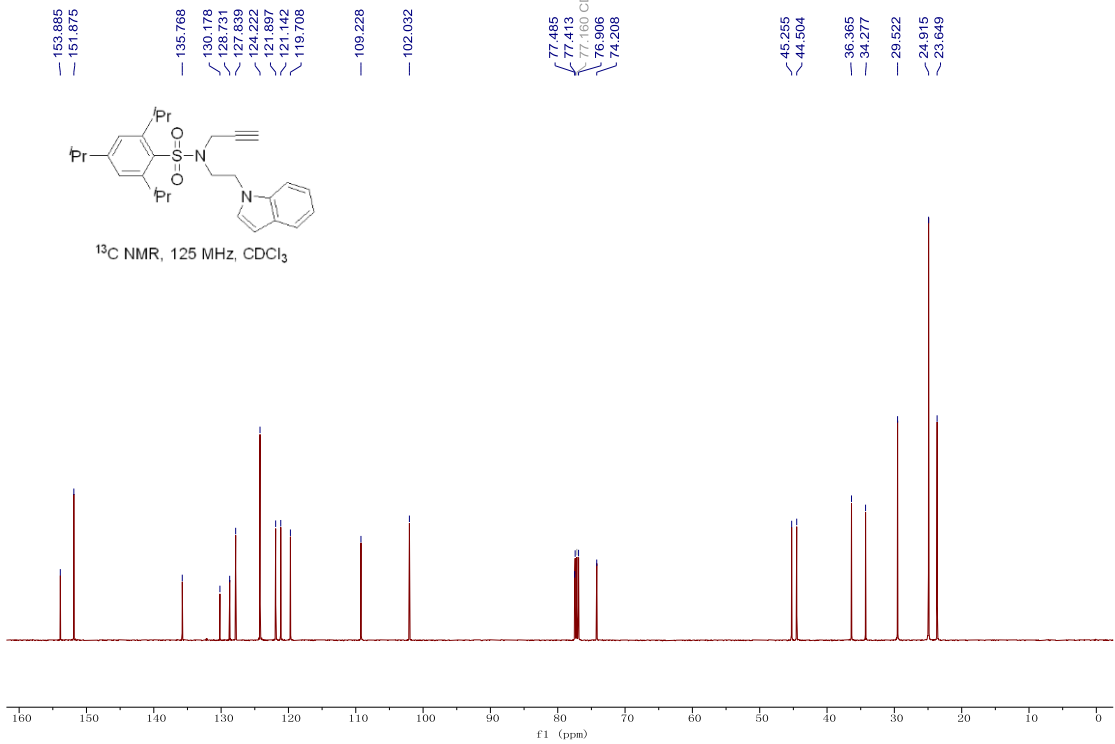

***N*-2-(1*H*-indol-1-yl)ethyl)-4-bromo-*N*-(prop-2-yn-1-yl)benzenesulfonamide (**1e**)**

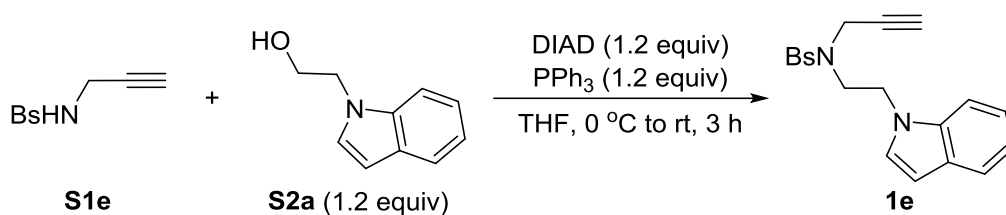

The compound **1e** (yellow oil, 388.5 mg, 93% yield) was obtained following General Procedure A from **S1e** (274.1 mg, 1.0 mmol, 1.0 equiv) and **S2a** (193.4 mg, 1.2 mmol, 1.2 equiv) using PPh<sub>3</sub> (314.8 mg, 1.2 mmol, 1.2 equiv) and DIAD (0.24 mL, 1.2 mmol, 1.2 equiv) after purification by flash column chromatography using petroleum ether/ethyl acetate = 8/1 (*R<sub>f</sub>* = 0.28) as eluent.

**<sup>1</sup>H NMR** (500 MHz, CDCl<sub>3</sub>, TMS)  $\delta$  7.66-7.61 (m, 3H), 7.58 (dt, *J* = 8.5, 2.0 Hz, 2H), 7.39 (dd, *J* = 8.0, 0.5 Hz, 1H), 7.24-7.21 (m, 1H), 7.14-7.10 (m, 2H), 6.51 (dd, *J* = 3.0, 0.5 Hz, 1H), 4.42 (t, *J* = 6.5 Hz, 2H), 3.78 (d, *J* = 2.5 Hz, 2H), 3.52 (t, *J* = 6.5 Hz, 2H), 2.04 (t, *J* = 2.5 Hz, 1H).

**<sup>13</sup>C NMR** (125 MHz, CDCl<sub>3</sub>)  $\delta$  137.5, 135.8, 132.4, 129.2, 128.8, 128.2, 127.9, 122.1, 121.3, 119.9, 109.2, 102.3, 76.4, 74.5, 46.5, 45.9, 38.2.

**IR** (KBr)  $\nu$  (cm<sup>-1</sup>): 3279, 1575, 1464, 1390, 1351, 1162, 1108, 1088, 1010 cm<sup>-1</sup>.

**HRMS** (ESI): calcd for C<sub>19</sub>H<sub>18</sub>BrN<sub>2</sub>O<sub>2</sub>S [M+H]<sup>+</sup>: 417.02669, found: 417.02686.

7.658  
7.654  
7.651  
7.648  
7.638  
7.634  
7.630  
7.617  
7.613  
7.592  
7.586  
7.584  
7.575  
7.571  
7.569  
7.397  
7.396  
7.381  
7.380  
7.240  
7.238  
7.226  
7.224  
7.221  
7.209  
7.207  
7.135  
7.133  
7.121  
7.119  
7.117  
7.113  
7.106  
7.103  
6.511  
6.510  
6.505  
6.503  
4.420  
4.416  
3.786  
3.781  
3.530  
3.517  
3.504

2.044  
2.039  
2.034

-0.000

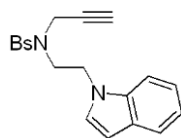

$^1\text{H NMR}$ , 500 MHz,  $\text{CDCl}_3$

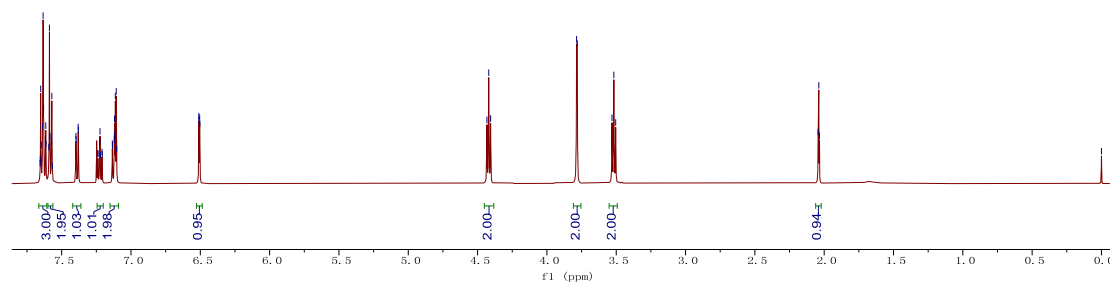

J7-11R. 2. f1d

137.458  
135.807  
132.393  
128.203  
128.804  
128.214  
127.935  
122.105  
121.298  
119.898  
109.202  
102.291

77.415  
77.160  $\text{CDCl}_3$   
76.907  
76.425  
74.460

46.537  
45.944

38.232

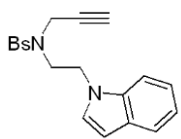

$^{13}\text{C NMR}$ , 125 MHz,  $\text{CDCl}_3$

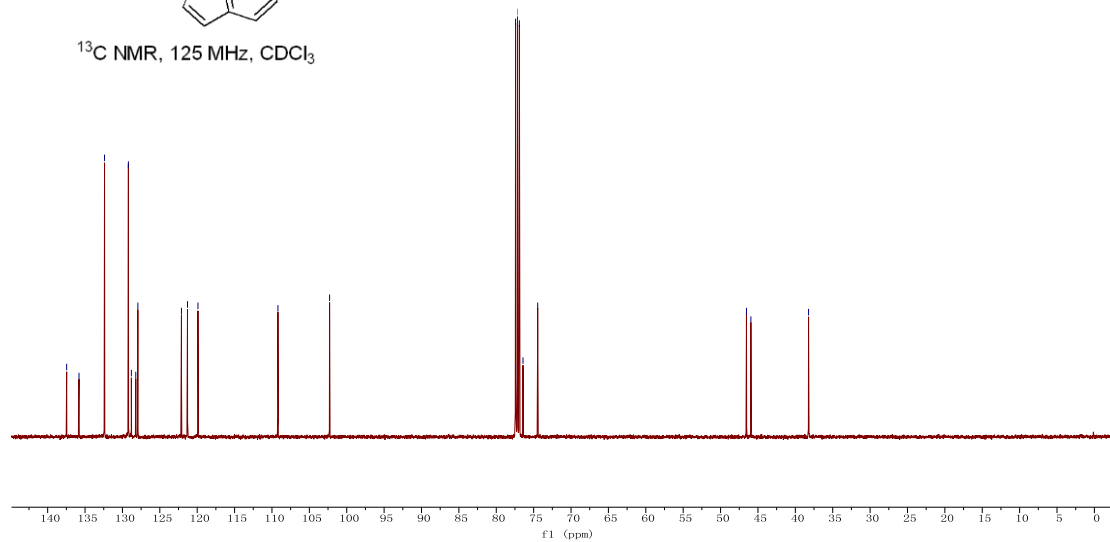

***N*-2-(1*H*-indol-1-yl)ethyl)-4-nitro-*N*-(prop-2-yn-1-yl)benzenesulfonamide (**1f**)**

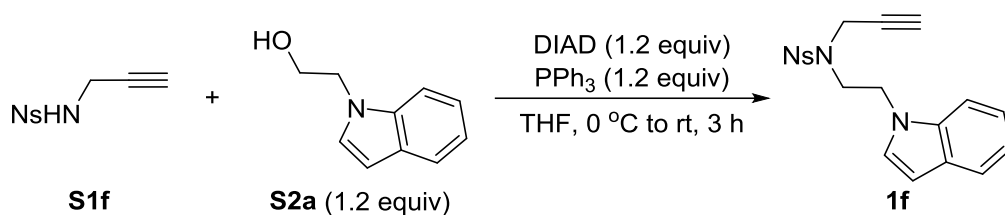

The compound **1f** (yellow solid, 375.2 mg, 98% yield) was obtained following General Procedure A from **S1f** (240.2 mg, 1.0 mmol, 1.0 equiv) and **S2a** (193.4 mg, 1.2 mmol, 1.2 equiv) using PPh<sub>3</sub> (314.8 mg, 1.2 mmol, 1.2 equiv) and DIAD (0.24 mL, 1.2 mmol, 1.2 equiv) after purification by flash column chromatography using petroleum ether/ethyl acetate = 4/1 ( $R_f$  = 0.32) as eluent.

**<sup>1</sup>H NMR** (500 MHz, CDCl<sub>3</sub>, TMS)  $\delta$  8.20 (d,  $J$  = 8.5 Hz, 2H), 7.89 (d,  $J$  = 8.5 Hz, 2H), 7.59 (dt,  $J$  = 8.0, 1.0 Hz, 1H), 7.34 (dd,  $J$  = 8.0, 1.0 Hz, 1H), 7.22-7.19 (m, 1H), 7.12-7.08 (m, 2H), 6.49 (dd,  $J$  = 3.0, 1.0 Hz, 1H), 4.41 (t,  $J$  = 6.0 Hz, 2H), 3.84 (d,  $J$  = 2.5 Hz, 2H), 3.59 (t,  $J$  = 6.0 Hz, 2H), 2.07 (t,  $J$  = 2.5 Hz, 1H).

**<sup>13</sup>C NMR** (125 MHz, CDCl<sub>3</sub>)  $\delta$  150.2, 144.2, 135.7, 128.80, 128.75, 127.8, 124.2, 122.2, 121.3, 120.0, 109.0, 102.5, 76.2, 74.8, 46.6, 45.7, 38.0.

**IR** (KBr)  $\nu$  (cm<sup>-1</sup>): 3266, 1532, 1464, 1349, 1255, 1109, 750, 620 cm<sup>-1</sup>.

**HRMS** (ESI): calcd for C<sub>19</sub>H<sub>18</sub>N<sub>3</sub>O<sub>4</sub>S [M+H]<sup>+</sup>: 384.10125, found: 384.10144.

**MP**: 80-84 °C.



8.212, 8.195, 7.899, 7.887, 7.597, 7.595, 7.593, 7.581, 7.579, 7.577, 7.546, 7.545, 7.332, 7.330, 7.248, 7.223, 7.221, 7.209, 7.206, 7.204, 7.192, 7.190, 7.115, 7.113, 7.102, 7.100, 7.088, 7.089, 7.083, 6.494, 6.493, 6.488, 6.486, 4.423, 4.411, 4.398, 3.842, 3.837, 3.839, 3.837, 3.574, 2.073, 2.068, 2.063, -0.000

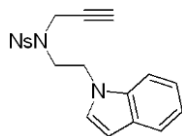

<sup>1</sup>H NMR, 500 MHz, CDCl<sub>3</sub>

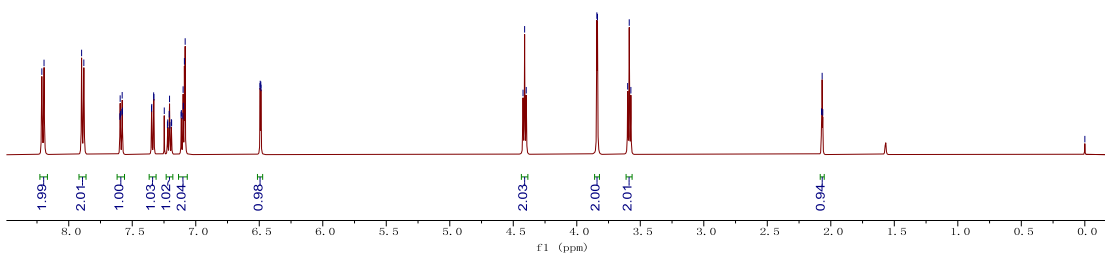

J7-120. 2. f1.d

150.157, 144.161, 135.696, 128.804, 128.750, 127.816, 124.203, 122.186, 121.345, 120.012, 109.048, 102.478, 77.413, 77.160, 76.905, 76.482, 74.757, 46.601, 45.668, 37.998

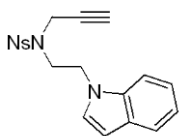

<sup>13</sup>C NMR, 125 MHz, CDCl<sub>3</sub>

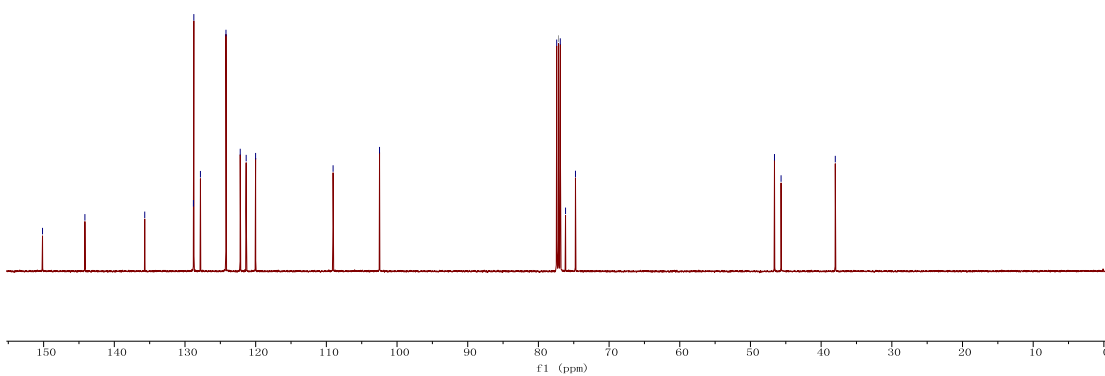

**4-methyl-*N*-(2-(4-methyl-1*H*-indol-1-yl)ethyl)-*N*-(prop-2-yn-1-yl)benzenesulfonamide (**1g**)**

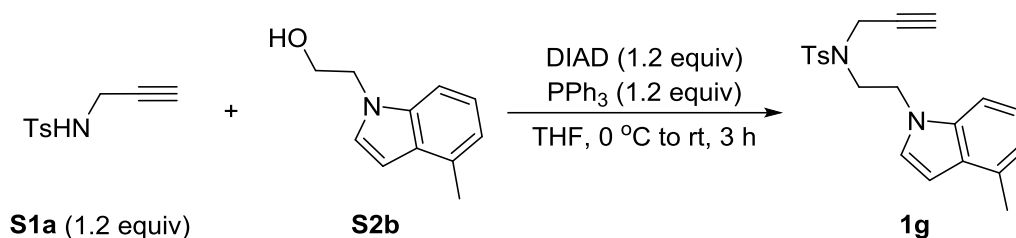

The compound **1g** (yellow solid, 361.0 mg, 74% yield) was obtained following General Procedure A from **S1a** (336.9 mg, 1.61 mmol, 1.2 equiv) and **S2b** (235.5 mg, 1.34 mmol, 1.0 equiv) using PPh<sub>3</sub> (422.3 mg, 1.61 mmol, 1.2 equiv) and DIAD (0.32 mL, 1.61 mmol, 1.2 equiv) after purification by flash column chromatography using petroleum ether/ethyl acetate = 8/1 (*R<sub>f</sub>* = 0.25) as eluent.

**<sup>1</sup>H NMR** (500 MHz, CDCl<sub>3</sub>, TMS)  $\delta$  7.68 (d, *J* = 8.5 Hz, 2H), 7.24 (d, *J* = 8.0 Hz, 3H), 7.14-7.10 (m, 2H), 6.91 (d, *J* = 7.0 Hz, 1H), 6.51 (d, *J* = 3.0 Hz, 1H), 4.41 (t, *J* = 6.5 Hz, 2H), 3.82 (d, *J* = 2.5 Hz, 2H), 3.49 (t, *J* = 6.5 Hz, 2H), 2.54 (s, 3H), 2.39 (s, 3H), 2.03 (t, *J* = 2.5 Hz, 1H).

**<sup>13</sup>C NMR** (125 MHz, CDCl<sub>3</sub>)  $\delta$  144.0, 135.5, 135.4, 130.7, 129.7, 128.6, 127.7, 127.4, 122.1, 120.0, 106.9, 100.5, 76.8, 74.1, 46.6, 46.1, 38.3, 21.6, 18.8.

**IR** (KBr)  $\nu$  (cm<sup>-1</sup>): 3312, 1494, 1333, 1299, 1161, 1096, 753, 730 cm<sup>-1</sup>.

**HRMS** (ESI): calcd for C<sub>21</sub>H<sub>23</sub>N<sub>2</sub>O<sub>2</sub>S [M+H]<sup>+</sup>: 367.14748, found: 367.14743.

**MP**: 63-65 °C.

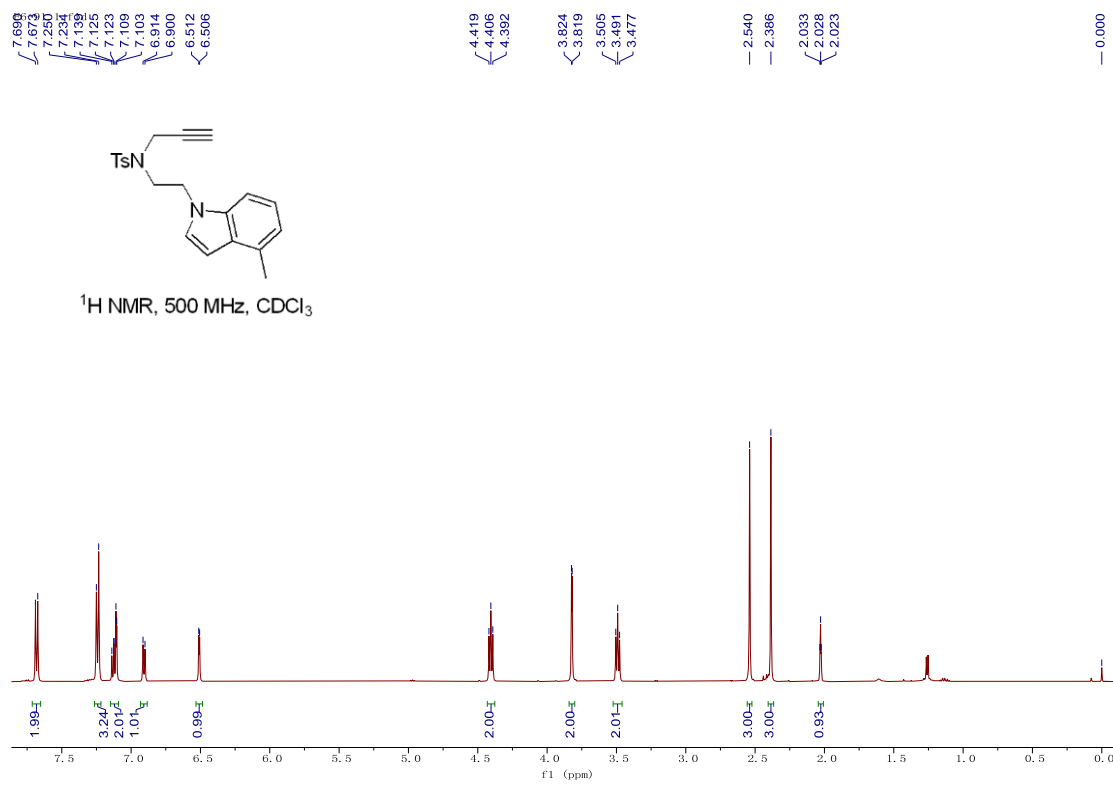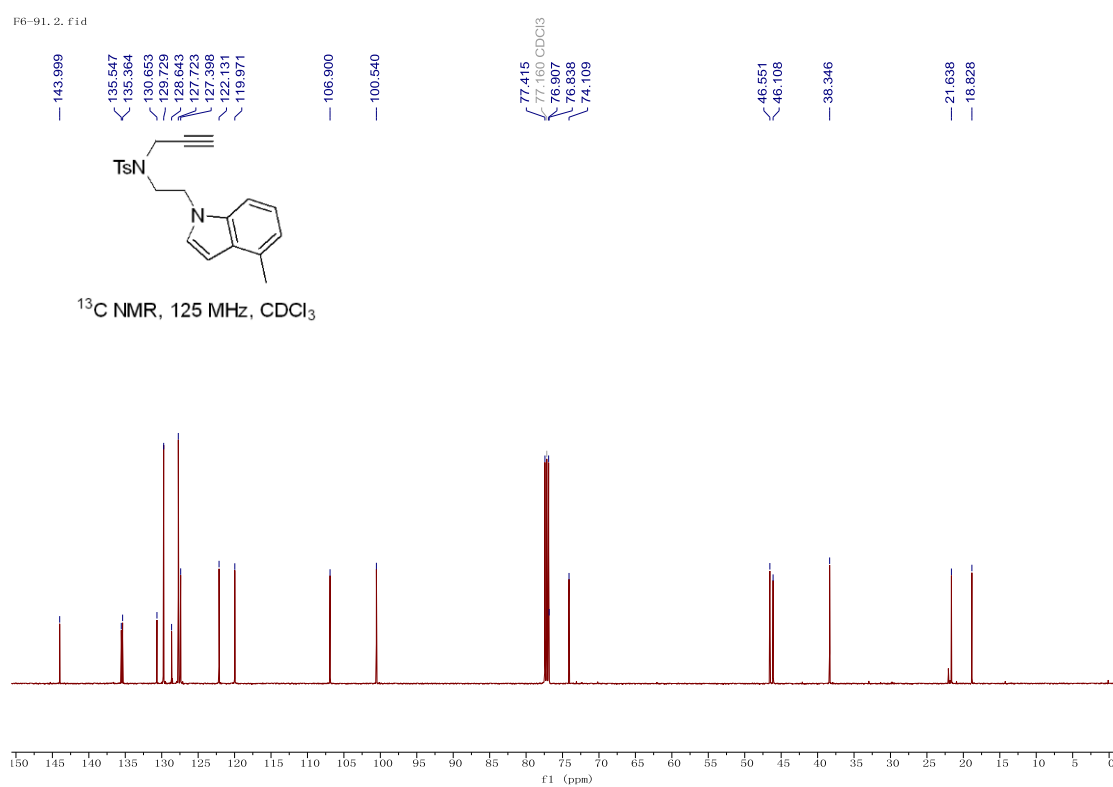

**4-methyl-N-(2-(5-methyl-1H-indol-1-yl)ethyl)-N-(prop-2-yn-1-yl)benzenesulfonamide (1h)**

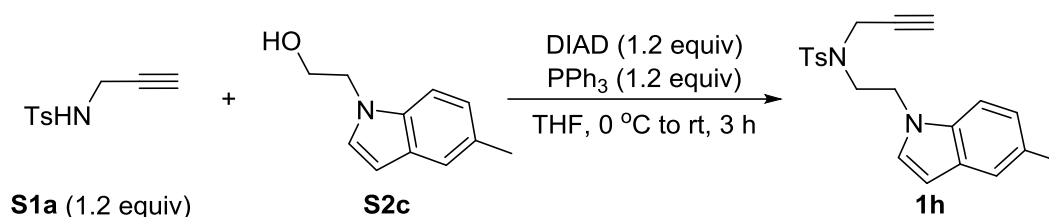

The compound **1h** (white solid, 188.2 mg, 88% yield) was obtained following General Procedure A from **S1a** (146.4 mg, 0.70 mmol, 1.2 equiv) and **S2c** (101.9 mg, 0.58 mmol, 1.0 equiv) using PPh<sub>3</sub> (183.6 mg, 0.70 mmol, 1.2 equiv) and DIAD (0.32 mL, 0.70 mmol, 1.2 equiv), after purification by flash column chromatography using petroleum ether/ethyl acetate = 8/1 ( $R_f$  = 0.26) as eluent.

**<sup>1</sup>H NMR** (500 MHz, CDCl<sub>3</sub>, TMS)  $\delta$  7.67 (d,  $J$  = 8.0 Hz, 2H), 7.38 (s, 1H), 7.28 (d,  $J$  = 8.5 Hz, 1H), 7.22 (d,  $J$  = 8.0 Hz, 2H), 7.05-7.02 (m, 2H), 6.40 (d,  $J$  = 3.0 Hz, 1H), 4.36 (t,  $J$  = 7.0 Hz, 2H), 3.78 (d,  $J$  = 2.5 Hz, 2H), 3.46 (t,  $J$  = 7.0 Hz, 2H), 2.43 (s, 3H), 2.37 (s, 3H), 2.02-2.00 (m, 1H).

**<sup>13</sup>C NMR** (125 MHz, CDCl<sub>3</sub>)  $\delta$  143.9, 135.3, 134.2, 129.7, 129.0, 128.8, 128.0, 127.6, 123.5, 120.7, 108.9, 101.4, 76.8, 74.1, 46.5, 46.0, 38.2, 21.6, 21.4.

**IR** (KBr)  $\nu$  (cm<sup>-1</sup>): 3260, 1344, 1301, 1160, 880, 725, 689, 664 cm<sup>-1</sup>.

**HRMS** (ESI): calcd for C<sub>21</sub>H<sub>23</sub>N<sub>2</sub>O<sub>2</sub>S [M+H]<sup>+</sup>: 367.14748, found: 367.14755.

**MP**: 79-82 °C.

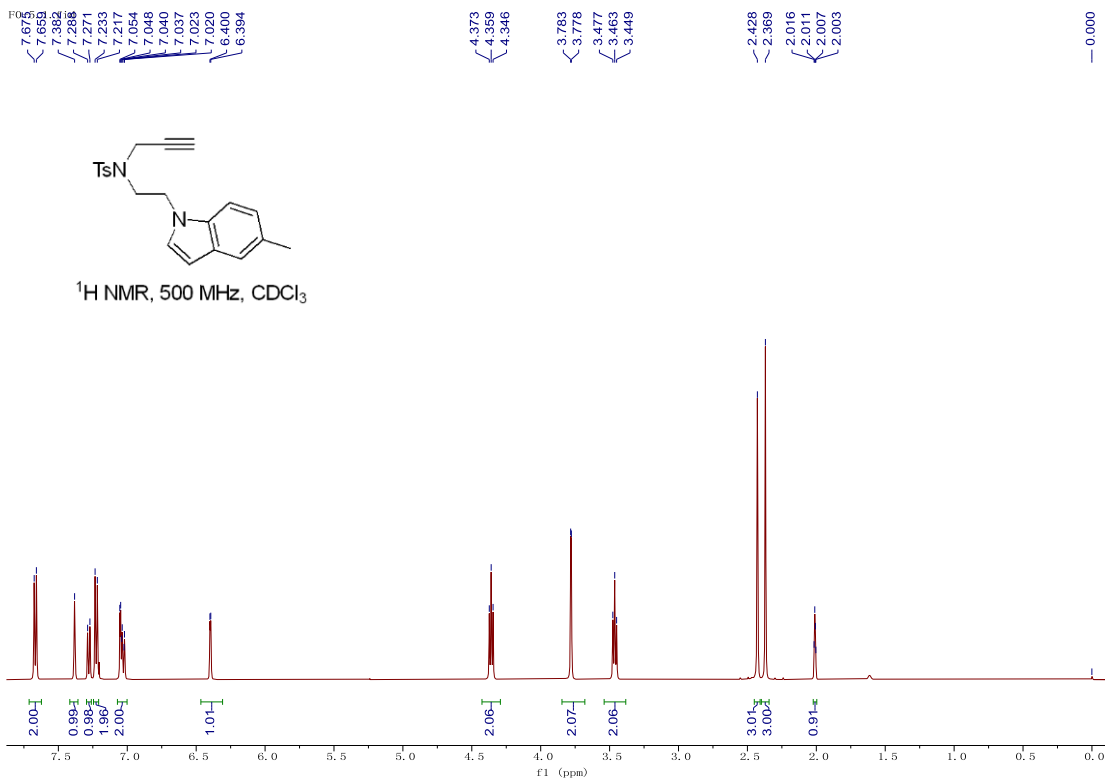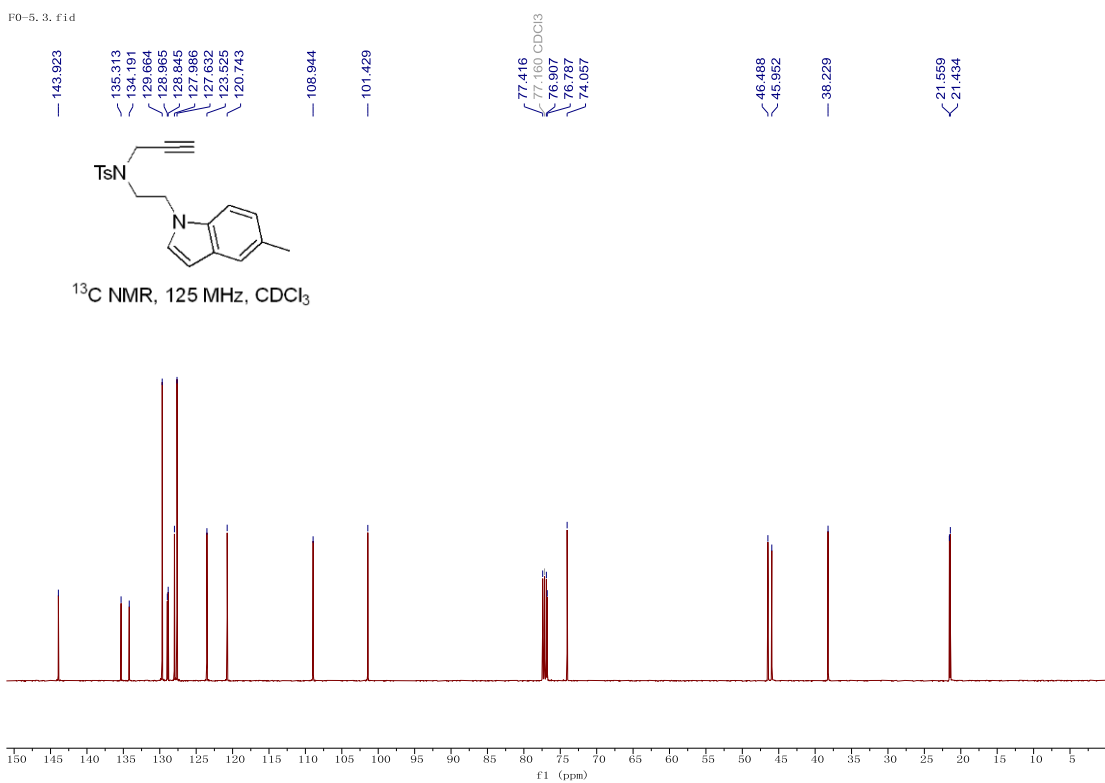

**4-methyl-*N*-(2-(6-methyl-1*H*-indol-1-yl)ethyl)-*N*-(prop-2-yn-1-yl)benzenesulfonamide (**1i**)**

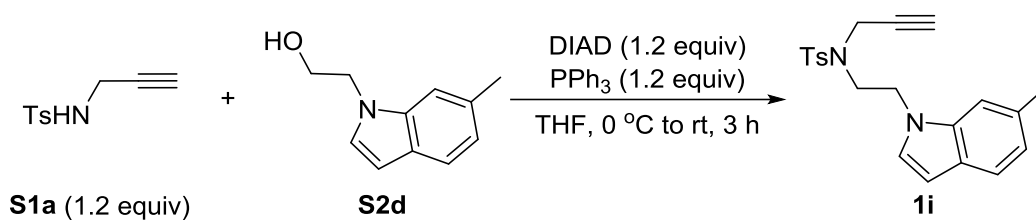

The compound **1i** (yellow oil, 301.6 mg, 82% yield) was obtained following General Procedure A from **S1a** (251.1 mg, 1.2 mmol, 1.2 equiv) and **S2d** (175.2 mg, 1.0 mmol, 1.0 equiv) using  $\text{PPh}_3$  (314.8 mg, 1.2 mmol, 1.2 equiv) and DIAD (0.24 mL, 1.2 mmol, 1.2 equiv), after purification by flash column chromatography using petroleum ether/ethyl acetate = 8/1 ( $R_f$  = 0.28) as eluent.

**$^1\text{H NMR}$**  (500 MHz,  $\text{CDCl}_3$ , TMS)  $\delta$  7.69 (dt,  $J$  = 8.5, 2.0 Hz, 2H), 7.49 (d,  $J$  = 8.0 Hz, 1H), 7.26-7.24 (m, 2H), 7.19 (s, 1H), 7.03 (d,  $J$  = 3.0 Hz, 1H), 6.94 (dd,  $J$  = 8.0, 1.5 Hz, 1H), 6.44 (d,  $J$  = 3.0 Hz, 1H), 4.38 (t,  $J$  = 6.5 Hz, 2H), 3.84 (d,  $J$  = 2.5 Hz, 2H), 3.49 (t,  $J$  = 6.5 Hz, 2H), 2.48 (s, 3H), 2.39 (s, 3H), 2.04 (t,  $J$  = 2.5 Hz, 1H).

**$^{13}\text{C NMR}$**  (125 MHz,  $\text{CDCl}_3$ )  $\delta$  144.0, 136.2, 135.4, 131.7, 129.7, 127.7, 127.4, 126.6, 121.6, 120.8, 109.3, 101.9, 76.9, 74.1, 46.5, 45.8, 38.3, 22.0, 21.6.

**IR** (KBr)  $\nu$  ( $\text{cm}^{-1}$ ): 3274, 1509, 1468, 1345, 1160, 1106, 804, 727, 658  $\text{cm}^{-1}$ .

**HRMS** (ESI): calcd for  $\text{C}_{21}\text{H}_{23}\text{N}_2\text{O}_2\text{S}$  [ $\text{M}+\text{H}$ ] $^+$ : 367.14748, found: 367.14746.

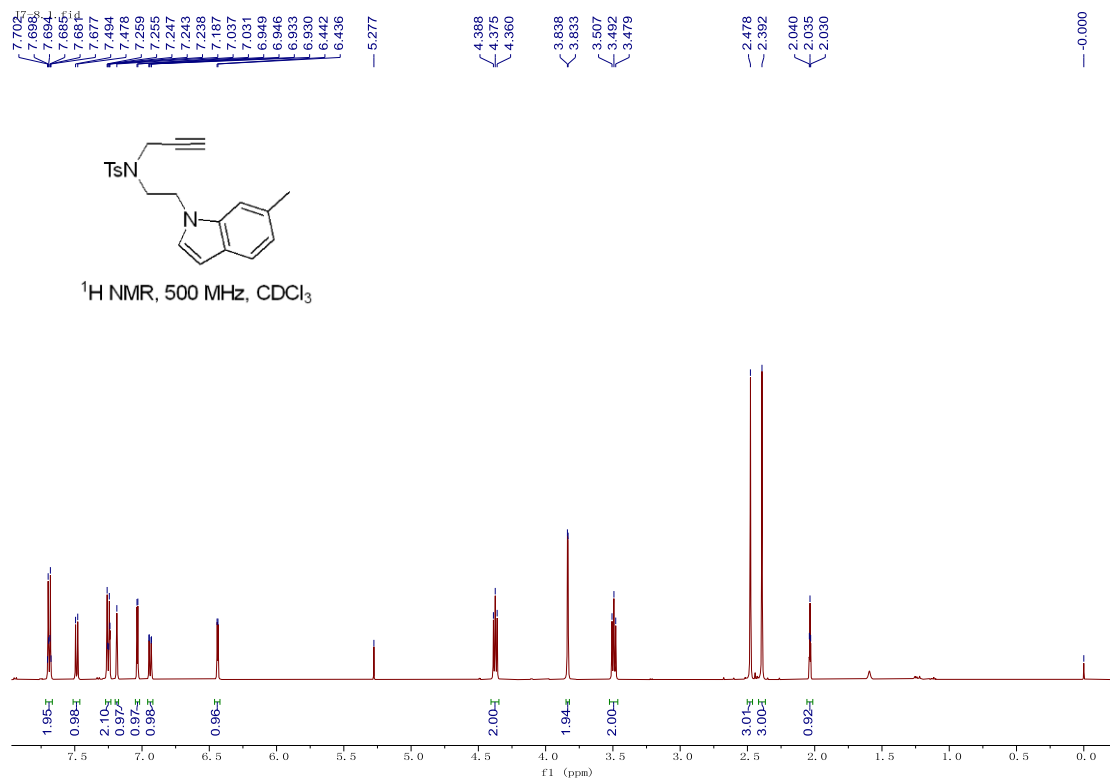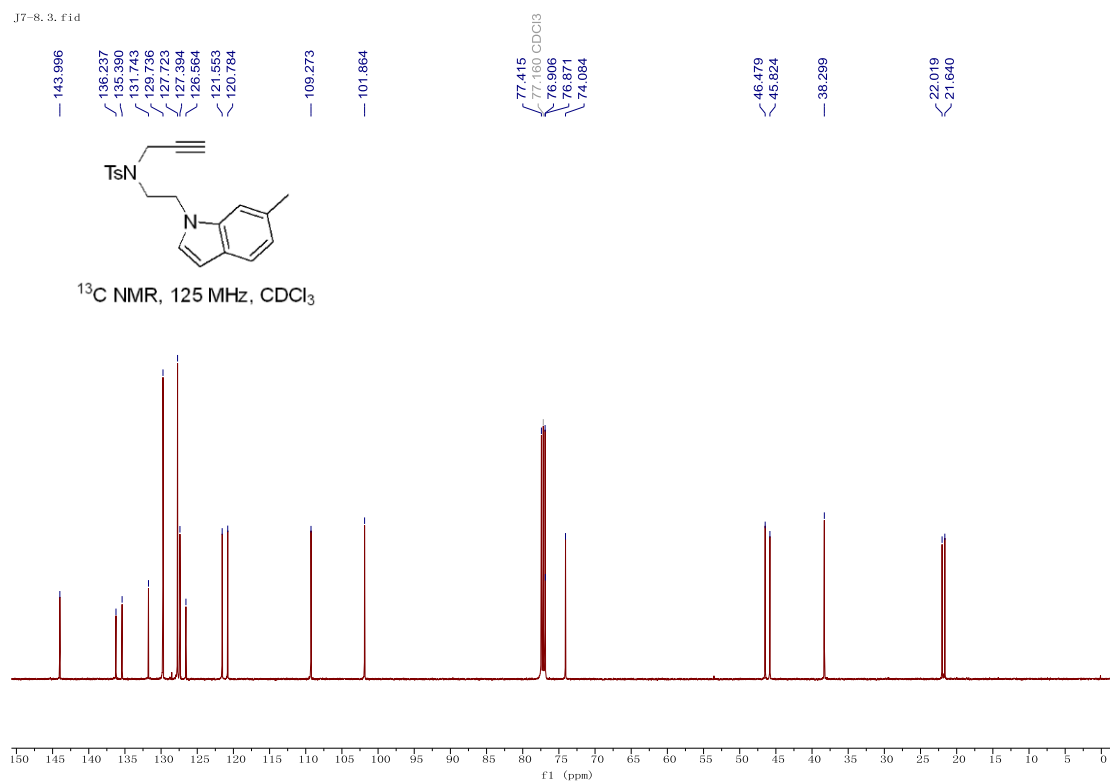

**4-methyl-*N*-(2-(7-methyl-1*H*-indol-1-yl)ethyl)-*N*-(prop-2-yn-1-yl)benzenesulfonamide (**1j**)**

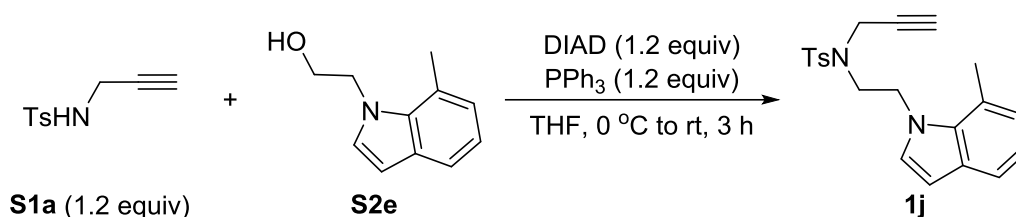

The compound **1j** (yellow solid, 226.1 mg, 58% yield) was obtained following General Procedure A from **S1a** (265.8 mg, 1.27 mmol, 1.2 equiv) and **S2e** (185.9 mg, 1.06 mmol, 1.0 equiv) using PPh<sub>3</sub> (333.1 mg, 1.27 mmol, 1.2 equiv) and DIAD (0.25 mL, 1.27 mmol, 1.2 equiv), after purification by flash column chromatography using petroleum ether/ethyl acetate = 8/1 ( $R_f$  = 0.29) as eluent.

**<sup>1</sup>H NMR** (500 MHz, CDCl<sub>3</sub>, TMS)  $\delta$  7.69 (dt,  $J$  = 8.5, 2.0 Hz, 2H), 7.45 (d,  $J$  = 7.5 Hz, 1H), 7.27-7.25 (m, 2H), 7.07 (d,  $J$  = 3.5 Hz, 1H), 6.99 (t,  $J$  = 7.5 Hz, 1H), 6.93 (dt,  $J$  = 7.0, 1.0 Hz, 1H), 6.49 (d,  $J$  = 3.0 Hz, 1H), 4.62 (t,  $J$  = 7.0 Hz, 2H), 3.82 (d,  $J$  = 2.5 Hz, 2H), 3.46 (t,  $J$  = 7.0 Hz, 2H), 2.74 (s, 3H), 2.40 (s, 3H), 1.99 (t,  $J$  = 2.5 Hz, 1H).

**<sup>13</sup>C NMR** (125 MHz, CDCl<sub>3</sub>)  $\delta$  144.1, 135.4, 134.5, 130.0, 129.8, 129.7, 127.8, 125.0, 120.7, 120.0, 119.4, 102.7, 76.7, 74.2, 48.4, 48.2, 38.4, 21.7, 20.0.

**IR** (KBr)  $\nu$  (cm<sup>-1</sup>): 3278, 1359, 1350, 1328, 1312, 1161, 1097, 880 cm<sup>-1</sup>.

**HRMS** (ESI): calcd for C<sub>21</sub>H<sub>23</sub>N<sub>2</sub>O<sub>2</sub>S [M+H]<sup>+</sup>: 367.14748, found: 367.14746.

**MP**: 85-88 °C.



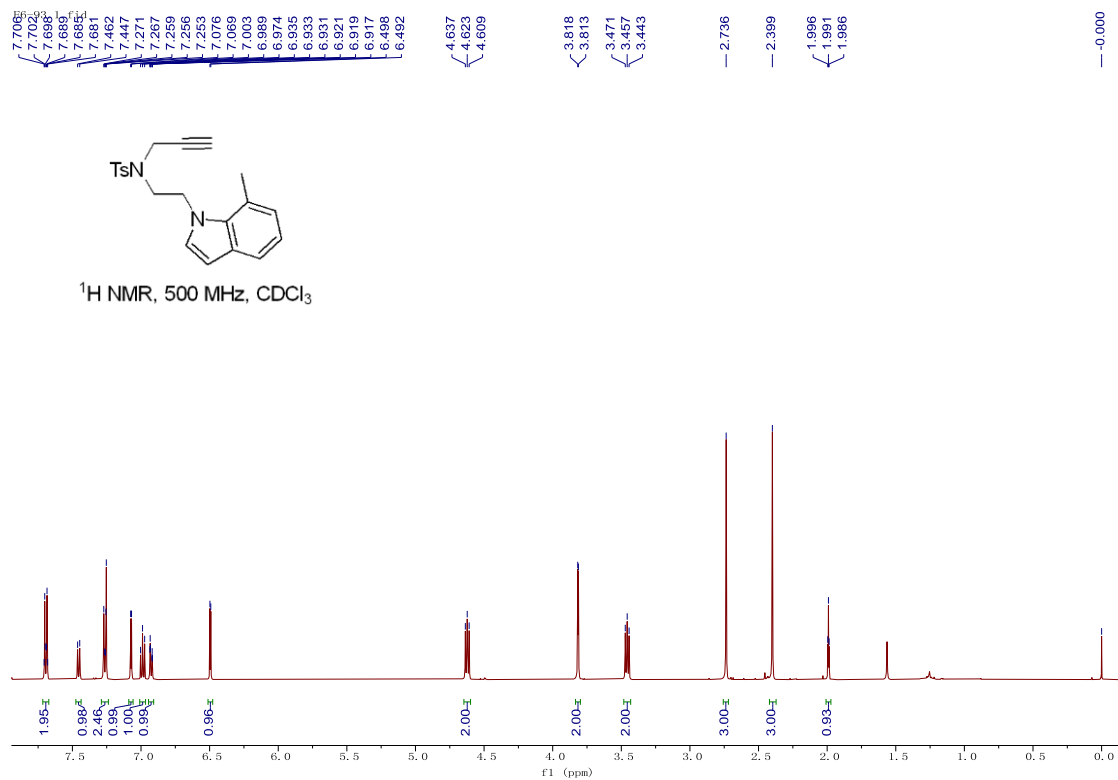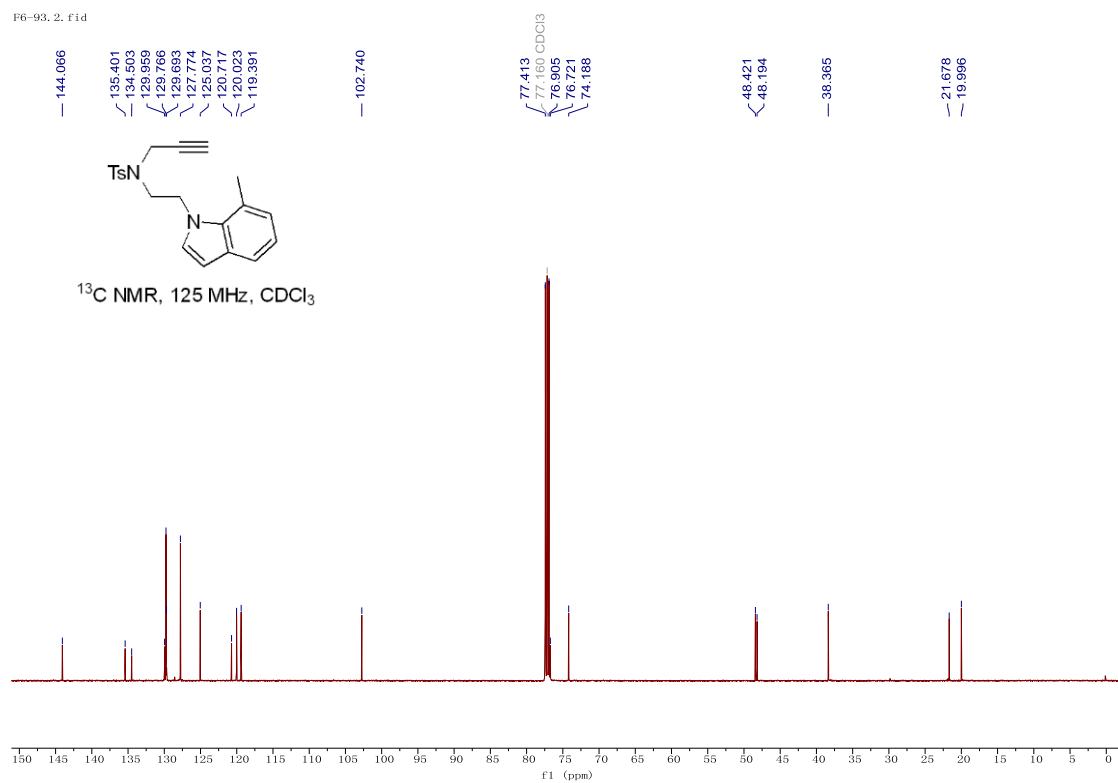

***N*-(2-(5-methoxy-1*H*-indol-1-yl)ethyl)-4-methyl-*N*-(prop-2-yn-1-yl)benzenesulfonamide (**1k**)**

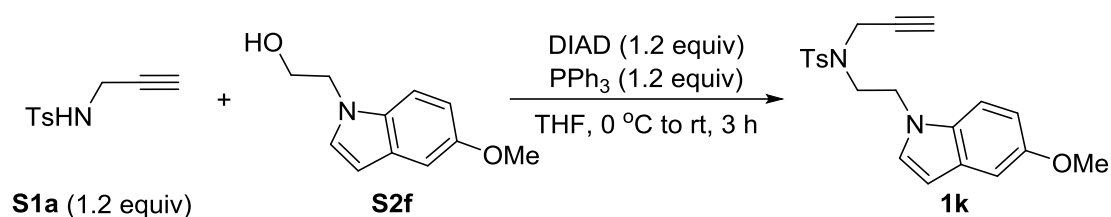

The compound **1k** (yellow solid, 370.1 mg, 97% yield) was obtained following General Procedure A from **S1a** (251.1 mg, 1.2 mmol, 1.2 equiv) and **S2f** (1.0 mmol, 191.2 mg, 1.0 equiv) using  $\text{PPh}_3$  (314.8 mg, 1.2 mmol, 1.2 equiv) and DIAD (0.24 mL, 1.2 mmol, 1.2 equiv), after purification by flash column chromatography using petroleum ether/ethyl acetate = 4/1 ( $R_f$  = 0.34) as eluent.

**$^1\text{H NMR}$**  (500 MHz,  $\text{CDCl}_3$ , TMS)  $\delta$  7.68 (dt,  $J$  = 7.5, 2.0 Hz, 2H), 7.29-7.24 (m, 3H), 7.08 (d,  $J$  = 3.5 Hz, 1H), 7.07 (d,  $J$  = 2.0 Hz, 1H), 6.87 (dd,  $J$  = 9.0, 2.5 Hz, 1H), 6.41 (dd,  $J$  = 3.0, 1.0 Hz, 1H), 4.38 (t,  $J$  = 6.5 Hz, 2H), 3.84 (s, 3H), 3.78 (d,  $J$  = 2.5 Hz, 2H), 3.48 (t,  $J$  = 6.5 Hz, 2H), 2.39 (s, 3H), 2.02 (t,  $J$  = 2.5 Hz, 1H).

**$^{13}\text{C NMR}$**  (125 MHz,  $\text{CDCl}_3$ )  $\delta$  154.2, 144.0, 135.4, 131.1, 129.7, 129.2, 128.6, 127.7, 112.3, 110.1, 102.7, 101.6, 76.8, 74.1, 55.9, 46.6, 46.3, 38.3, 21.6.

**IR** (KBr)  $\nu(\text{cm}^{-1})$ : 3269, 1489, 1446, 1341, 1239, 1161, 1152, 797, 728  $\text{cm}^{-1}$ .

**HRMS** (ESI): calcd for  $\text{C}_{21}\text{H}_{23}\text{N}_2\text{O}_3\text{S}$   $[\text{M}+\text{H}]^+$ : 383.14239, found: 383.14227.

**MP**: 63-65  $^\circ\text{C}$ .

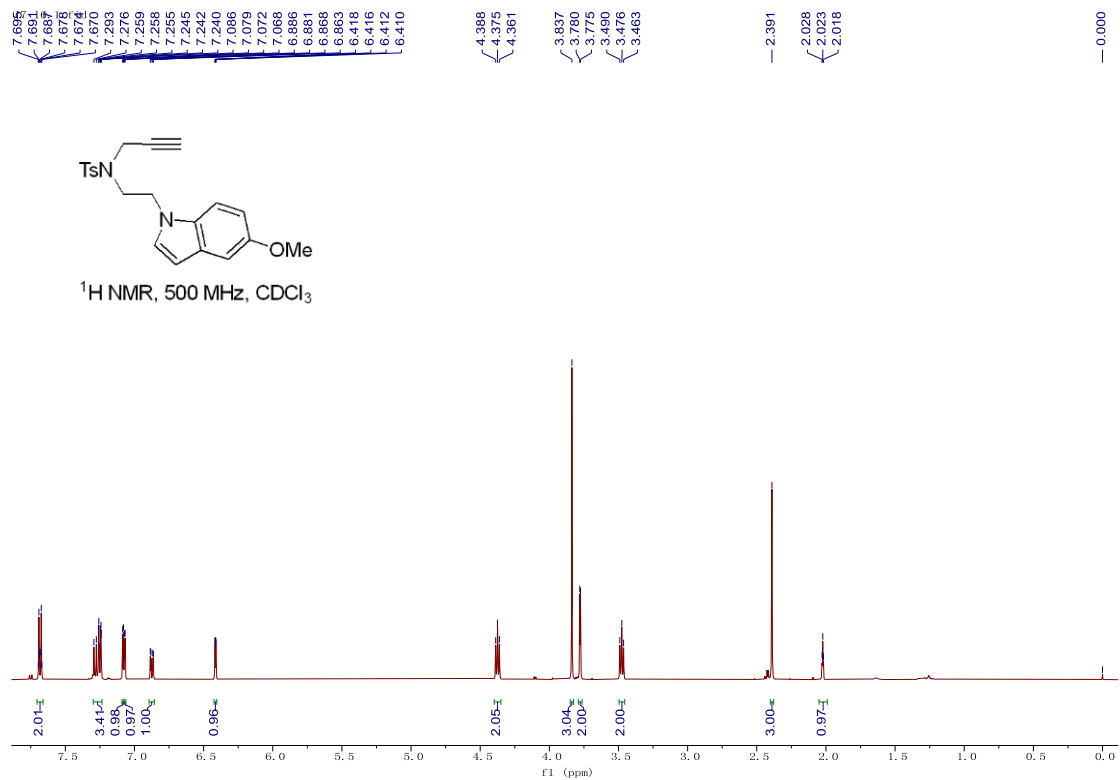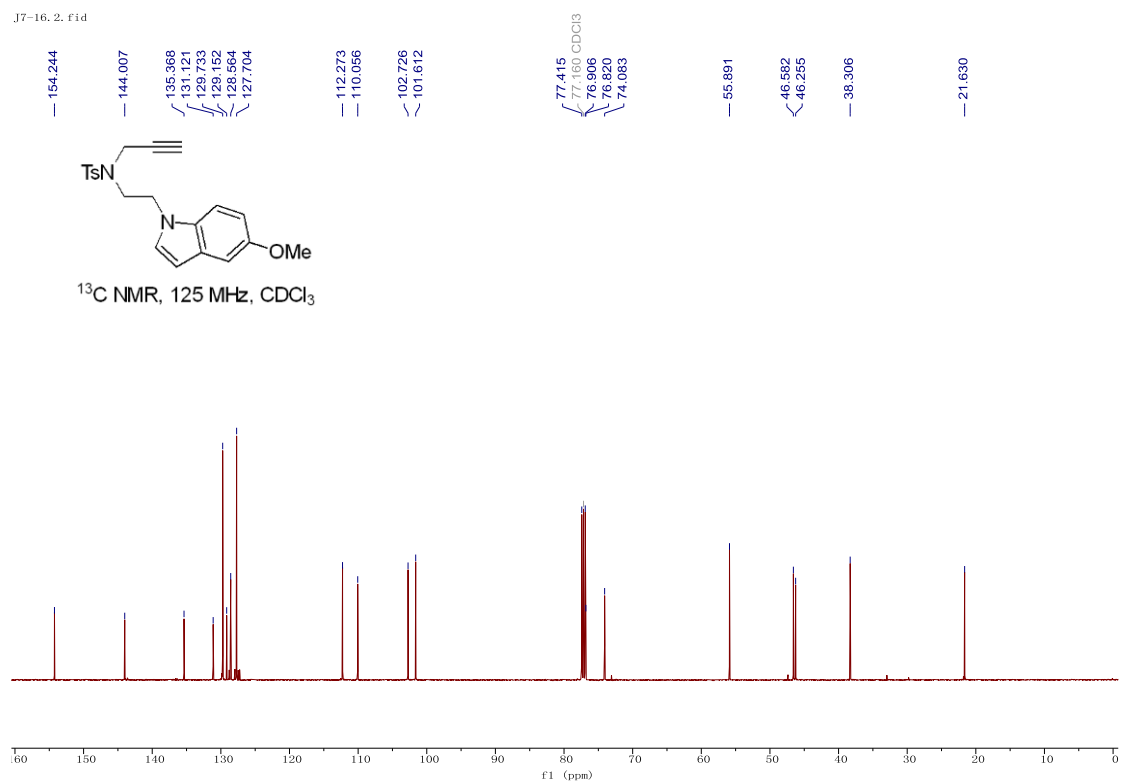

***N*-(2-(4-fluoro-1*H*-indol-1-yl)ethyl)-4-methyl-*N*-(prop-2-yn-1-yl)benzenesulfonamide (**11**)**

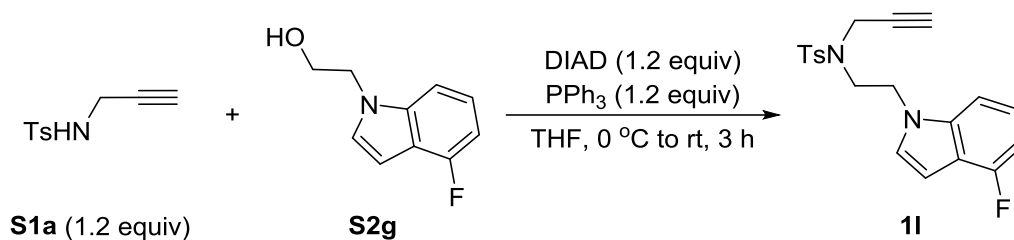

The compound **11** (yellow oil, 137 mg, 66% yield) was obtained following General Procedure A from **S1a** (141.2 mg, 0.67 mmol, 1.2 equiv) and **S2g** (100.4 mg, 0.56 mmol, 1.0 equiv) using PPh<sub>3</sub> (175.7 mg, 0.67 mmol, 1.2 equiv) and DIAD (0.13 mL, 0.67 mmol, 1.2 equiv), after purification by flash column chromatography using petroleum ether/ethyl acetate = 6/1 (*R<sub>f</sub>* = 0.24) as eluent.

**<sup>1</sup>H NMR** (500 MHz, CDCl<sub>3</sub>, TMS)  $\delta$  7.68 (dt, *J* = 8.5, 2.0 Hz, 2H), 7.26-7.25 (m, 2H), 7.18 (d, *J* = 8.5 Hz, 1H), 7.15-7.10 (m, 1H), 7.09 (d, *J* = 8.5 Hz, 1H), 6.77 (ddd, *J* = 10.5, 8.0, 1.0 Hz, 1H), 6.58 (dd, *J* = 3.5, 1.0 Hz, 1H), 4.42 (t, *J* = 7.0 Hz, 2H), 3.80 (d, *J* = 2.5 Hz, 2H), 3.50 (t, *J* = 7.0 Hz, 2H), 2.40 (s, 3H), 2.04 (t, *J* = 2.5 Hz, 1H).

**<sup>13</sup>C NMR** (125 MHz, CDCl<sub>3</sub>)  $\delta$  156.6 (d, *J* = 245.8 Hz), 144.1, 138.6 (d, *J* = 11.4 Hz), 135.3, 129.8, 128.0, 127.7, 122.6 (d, *J* = 7.8 Hz), 117.8 (d, *J* = 22.4 Hz), 105.5 (d, *J* = 3.5 Hz), 104.6 (d, *J* = 19.0 Hz), 98.2, 76.8, 74.2, 46.6, 46.4, 38.4, 21.7.

**<sup>19</sup>F NMR** (470 MHz, CDCl<sub>3</sub>)  $\delta$  (-121.80) - (-121.83) (m).

**IR** (KBr)  $\nu$  (cm<sup>-1</sup>): 3292, 2926, 1496, 1347, 1227, 1160, 742, 659 cm<sup>-1</sup>.

**HRMS** (ESI): calcd for C<sub>20</sub>H<sub>20</sub>FN<sub>2</sub>O<sub>2</sub>S [M+H]<sup>+</sup>: 371.12240, found: 371.12247.

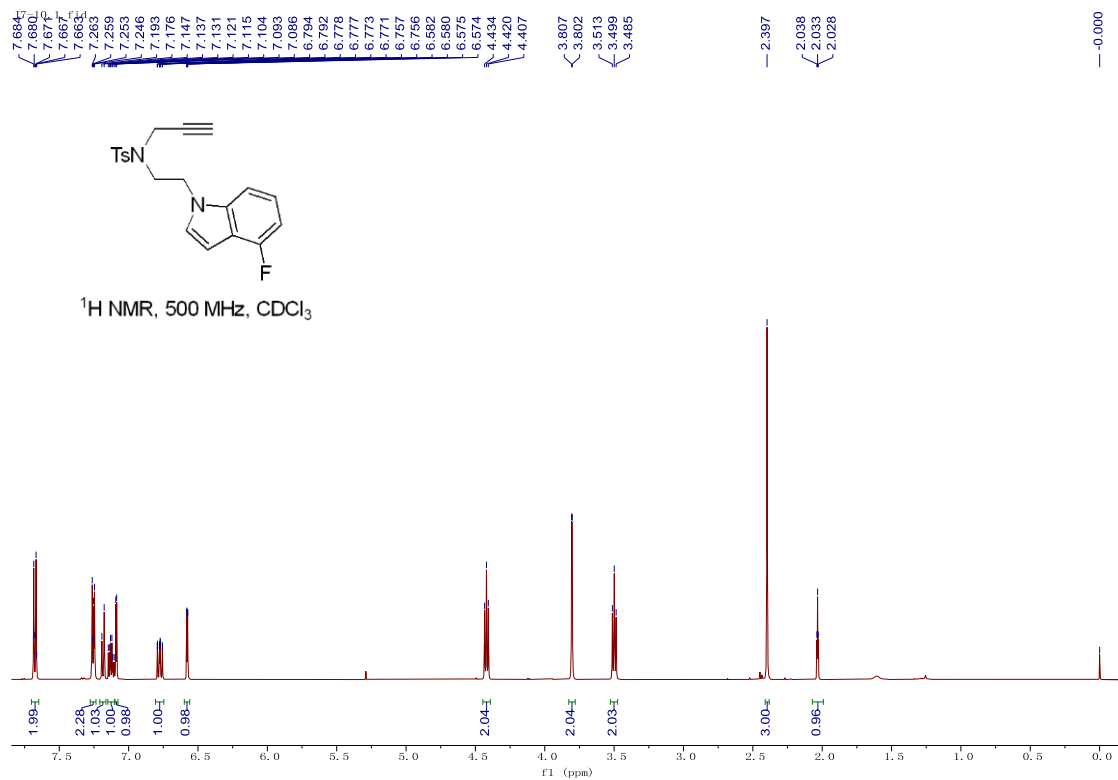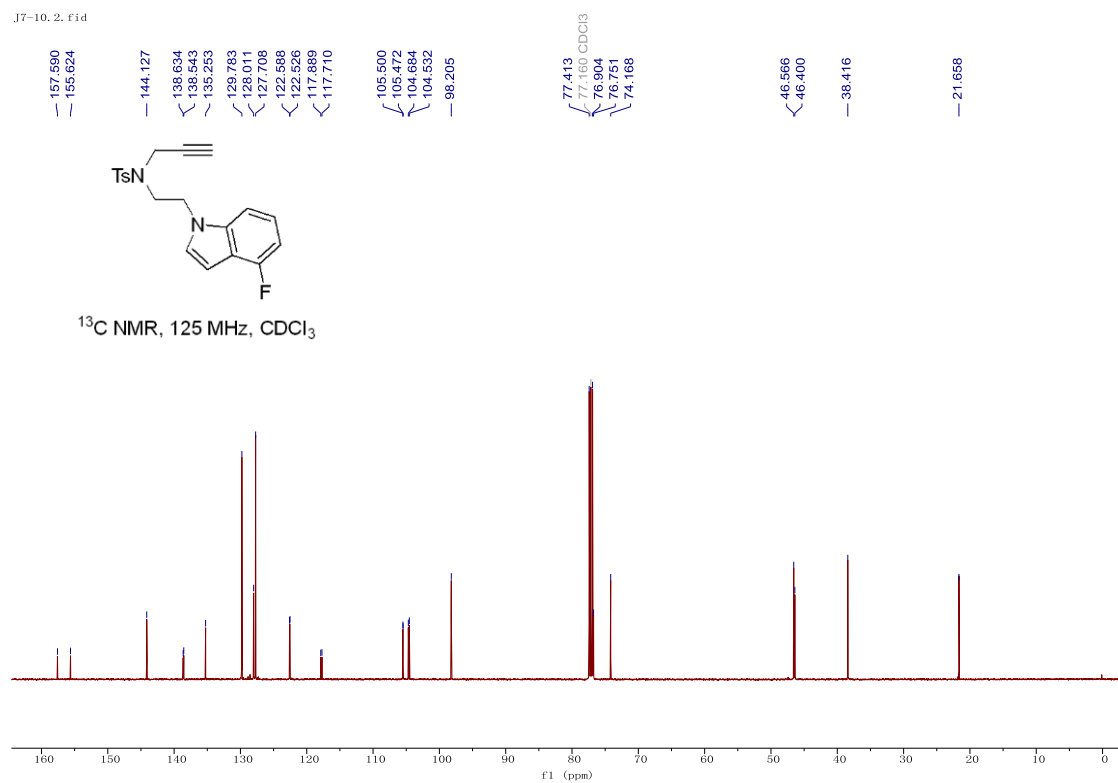

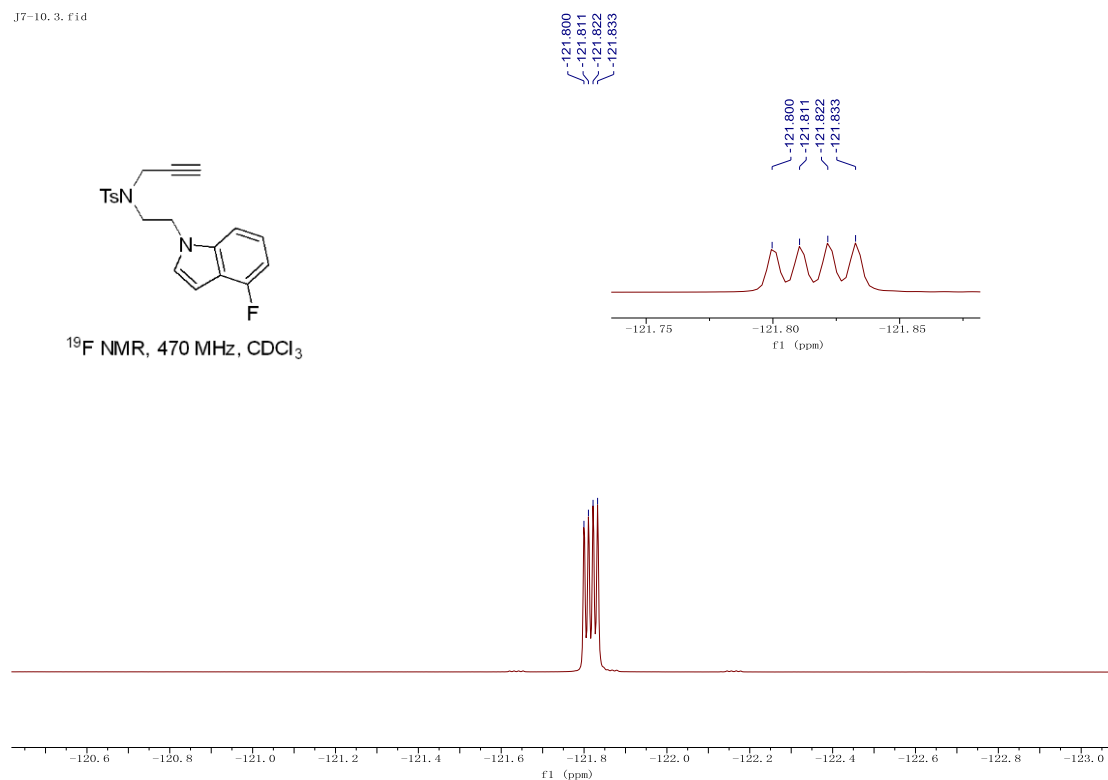

***N*-(2-(4-chloro-1*H*-indol-1-yl)ethyl)-4-methyl-*N*-(prop-2-yn-1-yl)benzenesulfonamide (**1m**)**

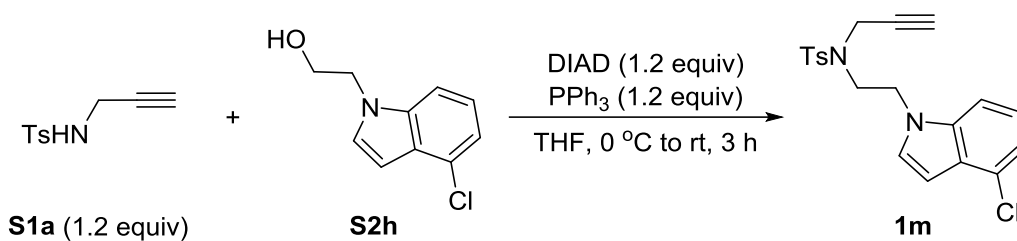

The compound **1m** (yellow oil, 159.4 mg, 87% yield) was obtained following General Procedure A from **S1a** (118.4 mg, 0.57 mmol, 1.2 equiv) and **S2h** (92.3 mg, 0.47 mmol, 1.0 equiv) using PPh<sub>3</sub> (148.5 mg, 0.57 mmol, 1.2 equiv) and DIAD (0.11 mL, 0.57 mmol, 1.2 equiv), after purification by flash column chromatography using petroleum ether/ethyl acetate = 6/1 (*R<sub>f</sub>* = 0.22) as eluent.

<sup>1</sup>H NMR (500 MHz, CDCl<sub>3</sub>, TMS) δ 7.66 (d, *J* = 8.0 Hz, 2H), 7.31 (dd, *J* = 7.0, 1.5 Hz, 1H), 7.24 (d, *J* = 8.0 Hz, 2H), 7.15 (d, *J* = 3.0 Hz, 1H), 7.13-7.09 (m, 2H), 6.60 (d, *J* = 3.0 Hz, 1H), 4.41 (t, *J* = 7.0 Hz, 2H), 3.79 (d, *J* = 2.5 Hz, 2H), 3.49 (t, *J* = 7.0 Hz, 2H), 2.39 (s, 3H), 2.04 (t, *J* = 2.5 Hz, 1H).

$^{13}\text{C}$  NMR (125 MHz,  $\text{CDCl}_3$ )  $\delta$  144.1, 136.6, 135.2, 129.8, 128.6, 127.7, 127.5, 126.4, 122.6, 119.6, 108.0, 100.8, 76.7, 74.2, 46.6, 46.4, 38.4, 21.7.

IR (KBr)  $\nu(\text{cm}^{-1})$ : 3290, 1442, 1352, 1343, 1274, 1189, 1161, 910  $\text{cm}^{-1}$ .

HRMS (ESI): calcd for  $\text{C}_{20}\text{H}_{20}\text{ClN}_2\text{O}_2\text{S}$   $[\text{M}+\text{H}]^+$ : 387.09285, found: 387.09268.

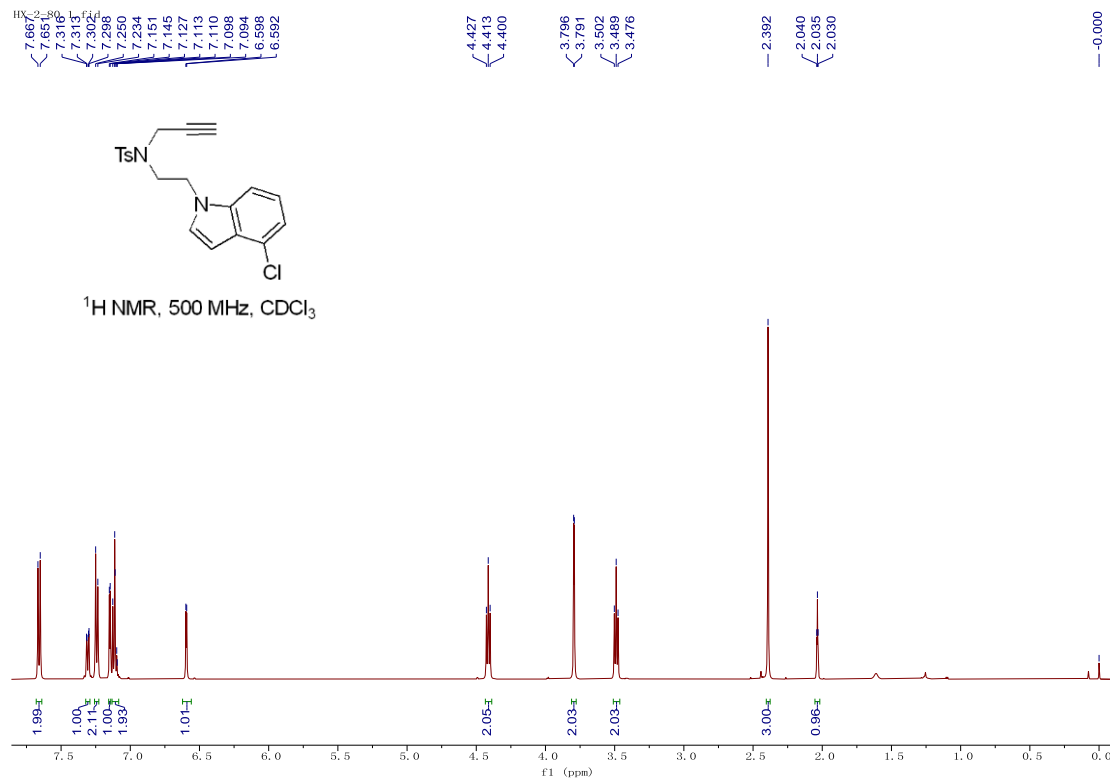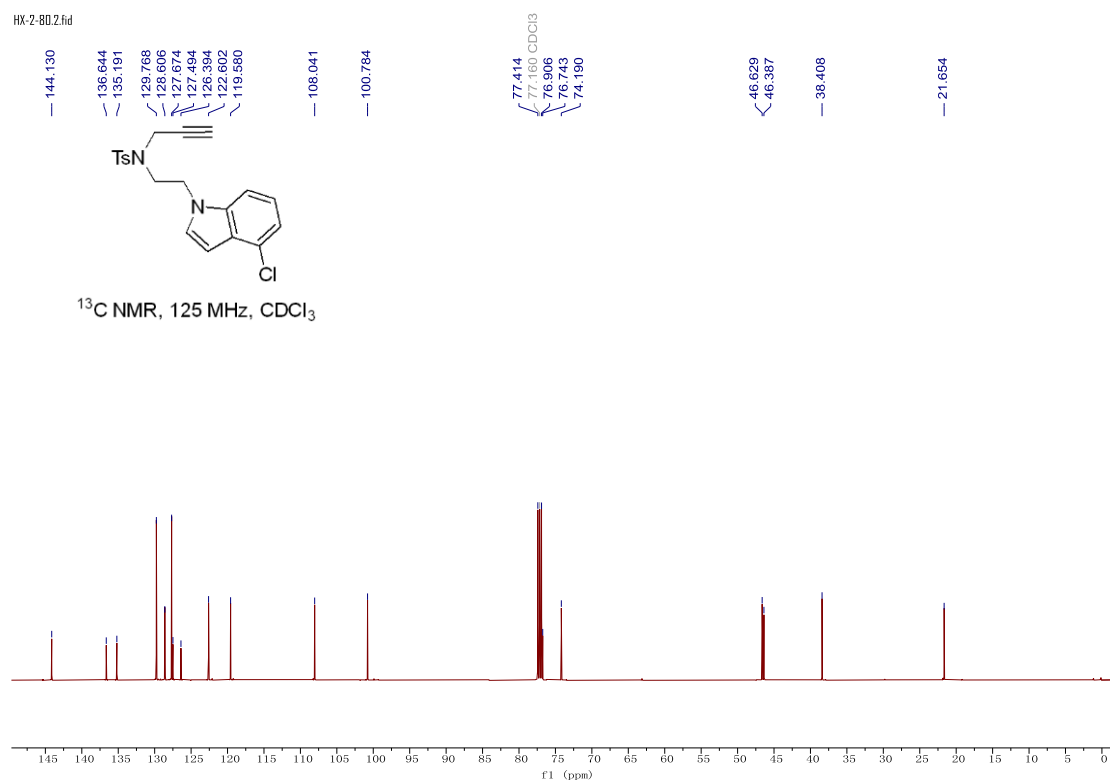

***N*-(2-(7-chloro-1*H*-indol-1-yl)ethyl)-4-methyl-*N*-(prop-2-yn-1-yl)benzenesulfonamide (**1n**)**

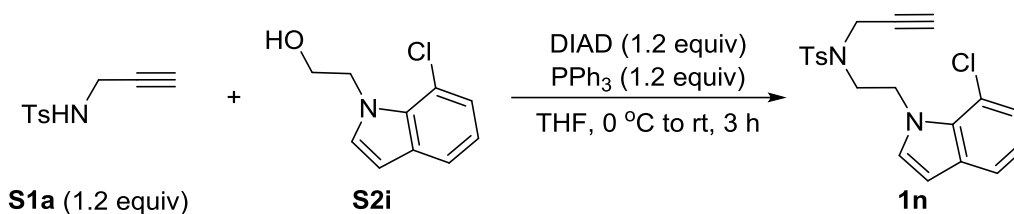

The compound **1n** (white solid, 70.1 mg, 65% yield) was obtained following General Procedure A from **S1a** (70.3 mg, 0.34 mmol, 1.2 equiv) and **S2i** (54.9 mg, 0.28 mmol, 1.0 equiv) using PPh<sub>3</sub> (88.1 mg, 0.34 mmol, 1.2 equiv) and DIAD (0.07 mL, 0.34 mmol, 1.2 equiv), after purification by flash column chromatography using petroleum ether/ethyl acetate = 8/1 (*R<sub>f</sub>* = 0.30) as eluent.

**<sup>1</sup>H NMR** (500 MHz, CDCl<sub>3</sub>, TMS)  $\delta$  7.62 (d, *J* = 8.0 Hz, 2H), 7.40 (dd, *J* = 8.0, 1.0 Hz, 1H), 7.17 (d, *J* = 8.0 Hz, 2H), 7.07-7.04 (m, 2H), 6.90 (t, *J* = 7.5 Hz, 1H), 6.42 (d, *J* = 3.5 Hz, 1H), 4.69 (t, *J* = 6.5 Hz, 2H), 3.69 (d, *J* = 2.5 Hz, 2H), 3.49 (t, *J* = 6.5 Hz, 2H), 2.31 (s, 3H), 1.83 (t, *J* = 2.5 Hz, 1H).

**<sup>13</sup>C NMR** (125 MHz, CDCl<sub>3</sub>)  $\delta$  143.9, 135.4, 132.2, 131.5, 130.9, 129.7, 127.8, 123.4, 120.5, 120.0, 116.4, 102.5, 76.7, 73.9, 48.5, 48.3, 38.5, 21.6.

**IR** (KBr)  $\nu$  (cm<sup>-1</sup>): 3264, 1348, 1325, 1160, 1112, 880, 728, 716, 659 cm<sup>-1</sup>.

**HRMS** (ESI): calcd for C<sub>20</sub>H<sub>20</sub>ClN<sub>2</sub>O<sub>2</sub>S [M+H]<sup>+</sup>: 387.09285, found: 387.09283.

**MP**: 82-85 °C.



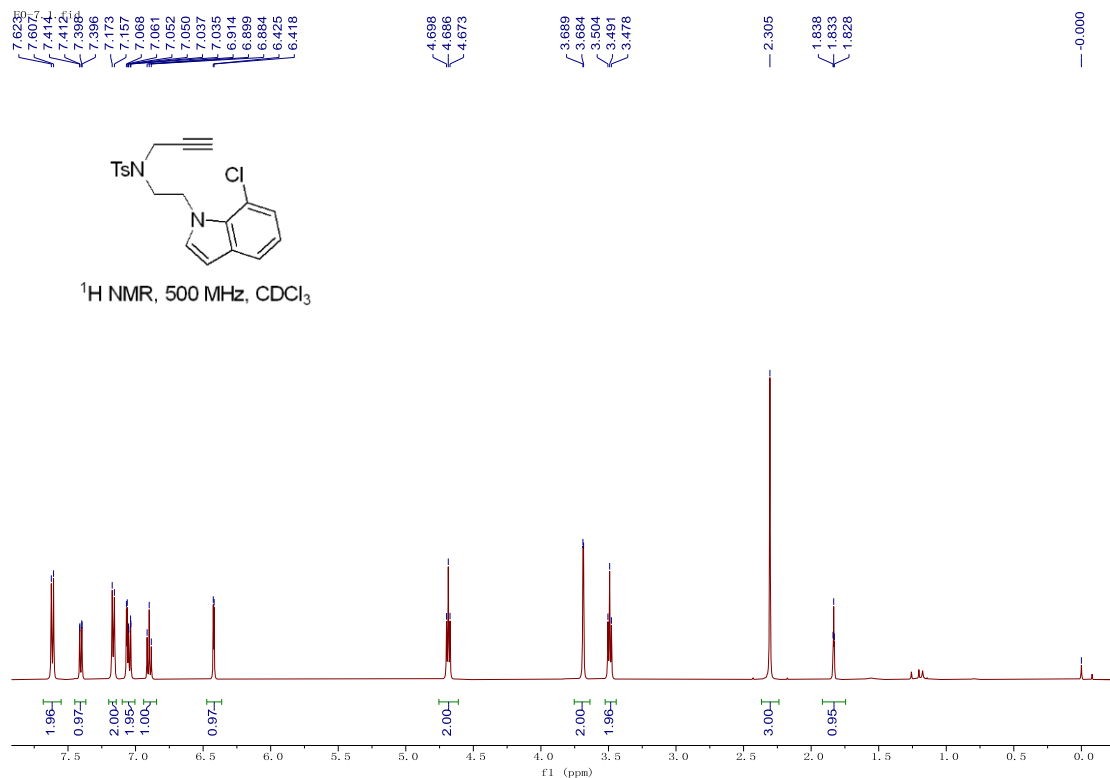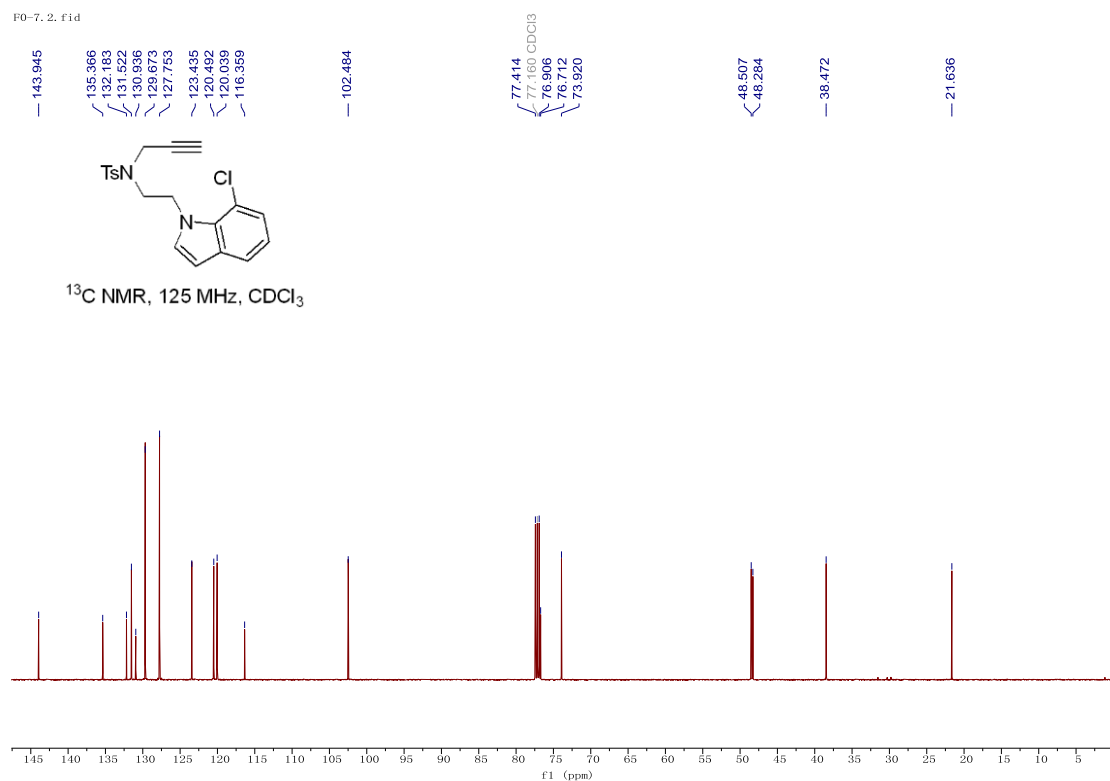

***N*-(2-(4-bromo-1*H*-indol-1-yl)ethyl)-4-methyl-*N*-(prop-2-yn-1-yl)benzenesulfonamide (**1o**)**

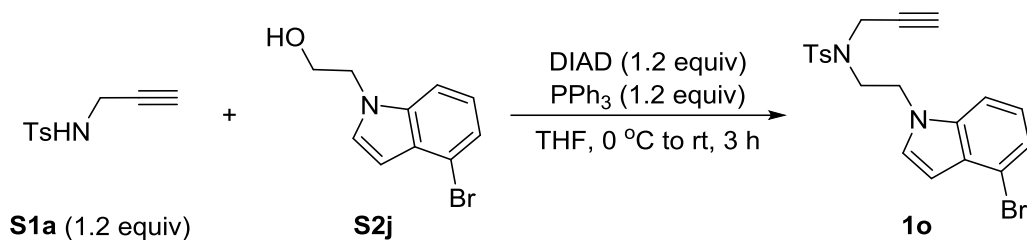

The compound **1o** (yellow solid, 107.1 mg, 83% yield) was obtained following General Procedure A from **S1a** (75.3 mg, 0.36 mmol, 1.2 equiv) and **S2j** (72.4 mg, 0.30 mmol, 1.0 equiv) using PPh<sub>3</sub> (94.4 mg, 0.36 mmol, 1.2 equiv) and DIAD (0.07 mL, 0.36 mmol, 1.2 equiv), after purification by flash column chromatography using petroleum ether/ethyl acetate = 6/1 (*R<sub>f</sub>* = 0.23) as eluent.

**<sup>1</sup>H NMR** (500 MHz, CDCl<sub>3</sub>, TMS)  $\delta$  7.57 (dt, *J* = 8.5, 2.0 Hz, 2H), 7.27 (dt, *J* = 8.5, 1.0 Hz, 1H), 7.19 (dd, *J* = 8.0, 1.0 Hz, 1H), 7.16-7.14 (m, 2H), 7.07 (d, *J* = 3.5 Hz, 1H), 6.98 (t, *J* = 8.0 Hz, 1H), 6.45 (dd, *J* = 3.0, 1.0 Hz, 1H), 4.31 (t, *J* = 7.0 Hz, 2H), 3.71 (d, *J* = 2.5 Hz, 2H), 3.40 (t, *J* = 7.0 Hz, 2H), 2.30 (s, 3H), 1.96 (t, *J* = 2.5 Hz, 1H).

**<sup>13</sup>C NMR** (125 MHz, CDCl<sub>3</sub>)  $\delta$  144.1, 136.2, 135.1, 129.7, 129.3, 128.6, 127.6, 122.9, 122.7, 115.1, 108.6, 102.4, 76.7, 74.2, 46.6, 46.4, 38.4, 21.6.

**IR** (KBr)  $\nu$  (cm<sup>-1</sup>): 3289, 1441, 1341, 1274, 911, 730, 657, 542 cm<sup>-1</sup>.

**HRMS** (ESI): calcd for C<sub>20</sub>H<sub>20</sub>BrN<sub>2</sub>O<sub>2</sub>S [M+H]<sup>+</sup>: 431.04234, found: 431.04260.

**MP**: 78-80 °C.

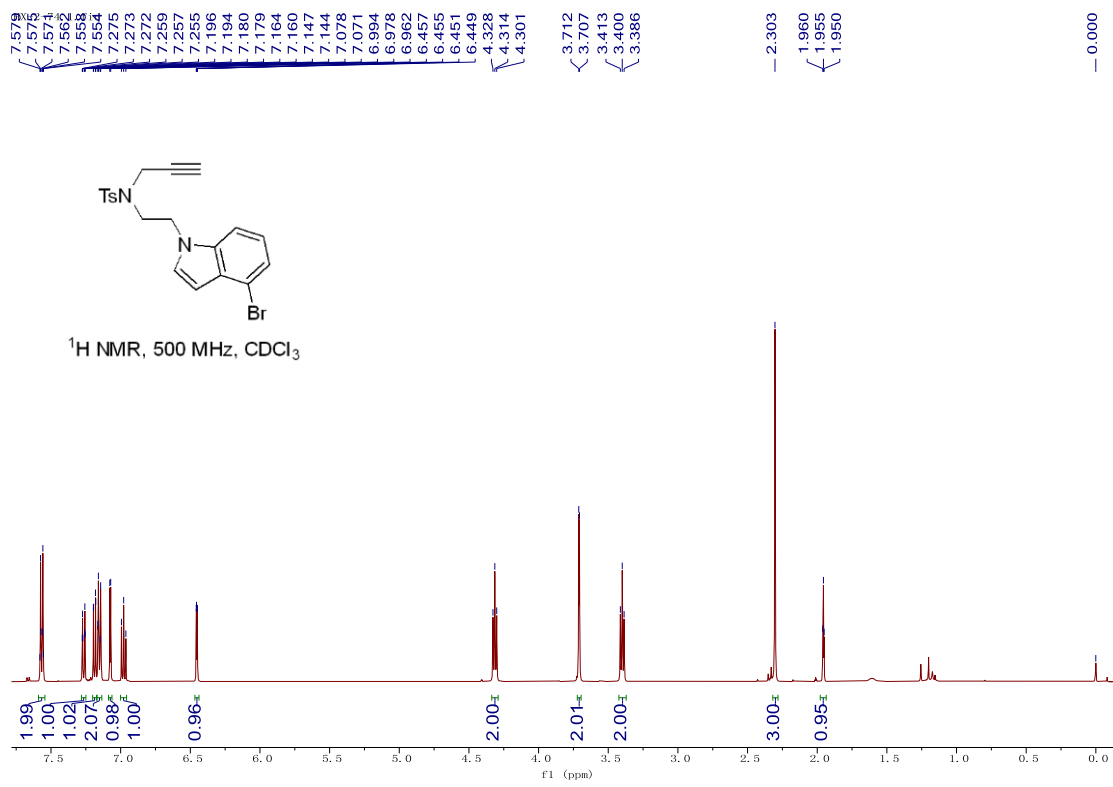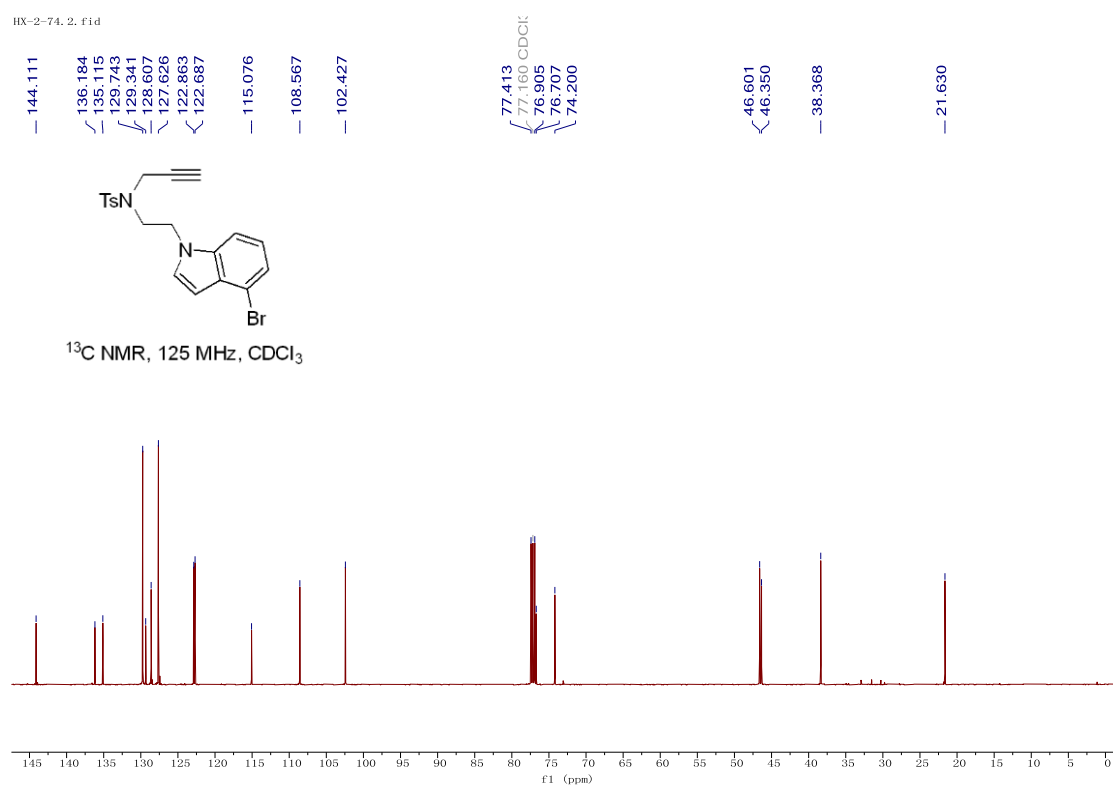

***N*-(2-(5-bromo-1*H*-indol-1-yl)ethyl)-4-methyl-*N*-(prop-2-yn-1-yl)benzenesulfonamide (**1p**)**

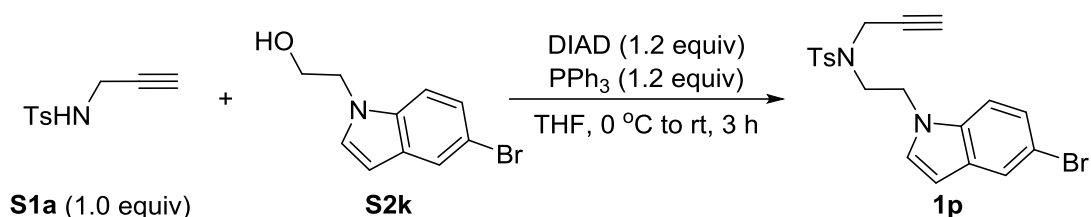

The compound **1p** (white solid, 446 mg, 74% yield) was obtained following General Procedure A from **S1a** (292.9 mg, 1.40 mmol, 1.0 equiv) and **S2k** (336.1 mg, 1.40 mmol, 1.0 equiv) using PPh<sub>3</sub> (440.7 mg, 1.68 mmol, 1.2 equiv) and DIAD (0.34 mL, 1.68 mmol, 1.2 equiv), after purification by flash column chromatography using petroleum ether/ethyl acetate = 6/1 (*R<sub>f</sub>* = 0.22) as eluent.

**<sup>1</sup>H NMR** (500 MHz, CDCl<sub>3</sub>, TMS)  $\delta$  7.734-7.730 (m, 1H), 7.67 (dt, *J* = 8.0, 1.5 Hz, 2H), 7.29-7.25 (m, 4H), 7.12 (d, *J* = 3.5 Hz, 1H), 6.44 (d, *J* = 3.0 Hz, 1H), 4.40 (t, *J* = 6.5 Hz, 2H), 3.77 (d, *J* = 2.5 Hz, 2H), 3.48 (t, *J* = 6.5 Hz, 2H), 2.40 (s, 3H), 2.03 (t, *J* = 2.5 Hz, 1H).

**<sup>13</sup>C NMR** (125 MHz, CDCl<sub>3</sub>)  $\delta$  144.1, 136.2, 135.2, 129.8, 129.4, 128.6, 127.7, 122.9, 122.8, 115.2, 108.6, 102.5, 76.8, 74.2, 46.6, 46.4, 38.4, 21.7.

**IR** (KBr)  $\nu$  (cm<sup>-1</sup>): 3276, 1466, 1365, 1327, 1156, 1109, 873, 656 cm<sup>-1</sup>.

**HRMS** (ESI): calcd for C<sub>20</sub>H<sub>20</sub>BrN<sub>2</sub>O<sub>2</sub>S [M+H]<sup>+</sup>: 431.04234, found: 431.04254.

**MP**: 80-82 °C.

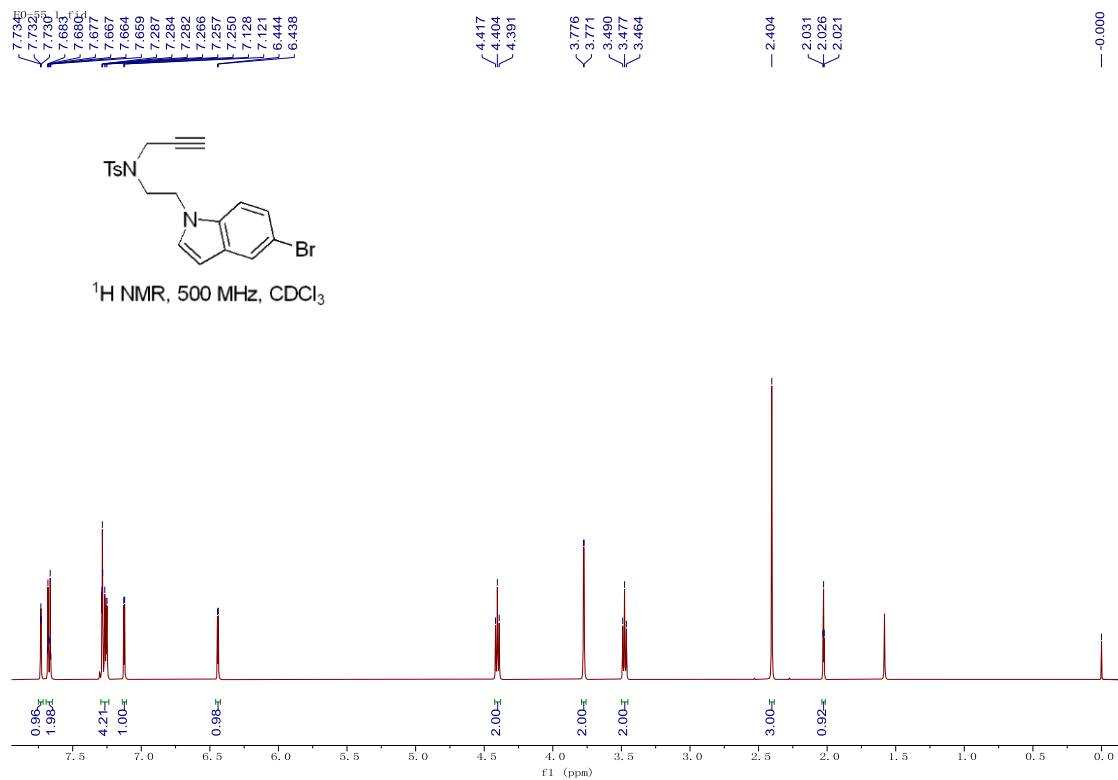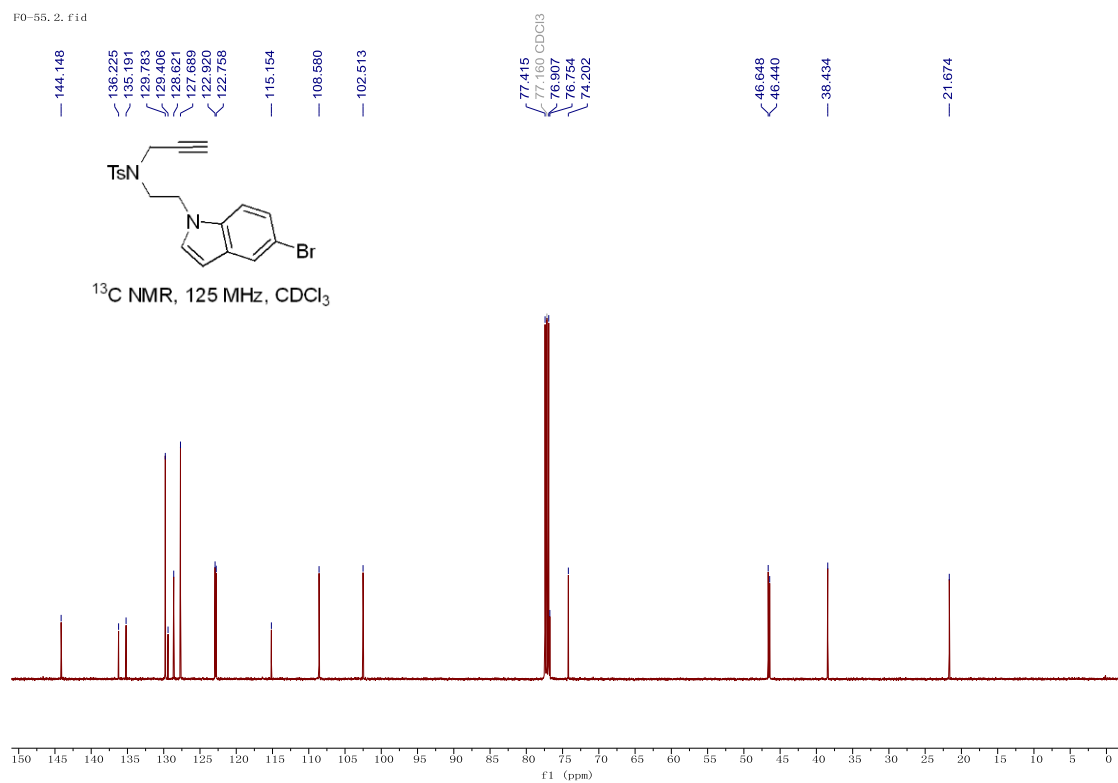

***N*-(2-(6-bromo-1*H*-indol-1-yl)ethyl)-4-methyl-*N*-(prop-2-yn-1-yl)benzenesulfonamide (**1q**)**

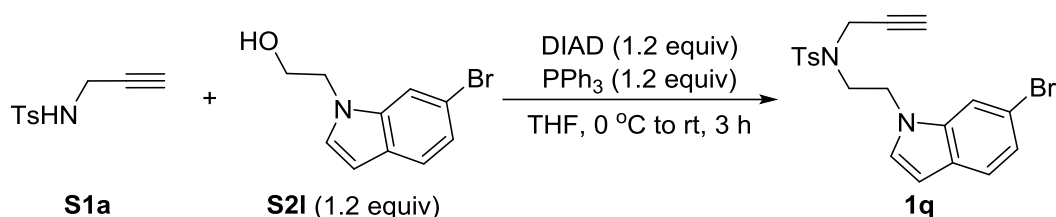

The compound **1q** (yellow solid, 377.2 mg, 98% yield) was obtained following General Procedure A from **S1a** (185.8 mg, 0.88 mmol, 1.0 equiv) and **S2I** (250.6 mg, 1.05 mmol, 1.2 equiv) using PPh<sub>3</sub> (275.4 mg, 1.05 mmol, 1.2 equiv) and DIAD (0.21 mL, 1.05 mmol, 1.2 equiv), after purification by flash column chromatography using petroleum ether/ethyl acetate = 8/1 (*R<sub>f</sub>* = 0.21) as eluent.

**<sup>1</sup>H NMR** (500 MHz, CDCl<sub>3</sub>, TMS)  $\delta$  7.68 (d, *J* = 8.0 Hz, 2H), 7.53 (s, 1H), 7.46 (d, *J* = 8.0 Hz, 1H), 7.26 (d, *J* = 8.0 Hz, 2H), 7.19 (dd, *J* = 8.5, 1.5 Hz, 1H), 7.11 (d, *J* = 3.0 Hz, 1H), 6.47 (d, *J* = 3.5 Hz, 1H), 4.36 (t, *J* = 7.0 Hz, 2H), 3.83 (d, *J* = 3.0 Hz, 2H), 3.48 (t, *J* = 7.0 Hz, 2H), 2.40 (s, 3H), 2.08 (t, *J* = 3.0 Hz, 1H).

**<sup>13</sup>C NMR** (125 MHz, CDCl<sub>3</sub>)  $\delta$  144.2, 136.6, 135.1, 129.8, 128.8, 127.7, 127.6, 123.0, 122.4, 115.5, 112.4, 102.3, 76.7, 74.4, 46.4, 46.0, 38.4, 21.7.

**IR (KBr)**  $\nu$ (cm<sup>-1</sup>): 3287, 1368, 1358, 1164, 872, 817, 728, 653 cm<sup>-1</sup>.

**HRMS (ESI)**: calcd for C<sub>20</sub>H<sub>20</sub>BrN<sub>2</sub>O<sub>2</sub>S [M+H]<sup>+</sup>: 431.04234, found: 431.04251.

**MP**: 86-89 °C.

7.692  
7.676  
7.533  
7.465  
7.449  
7.272  
7.256  
7.203  
7.200  
7.186  
7.183  
7.109  
7.103  
6.460  
6.463

4.378  
4.364  
4.351

3.837  
3.831

3.493  
3.480  
3.466

2.399  
2.082  
2.077  
2.072

0.000

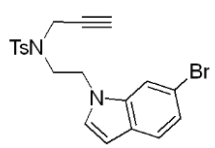

<sup>1</sup>H NMR, 500 MHz, CDCl<sub>3</sub>

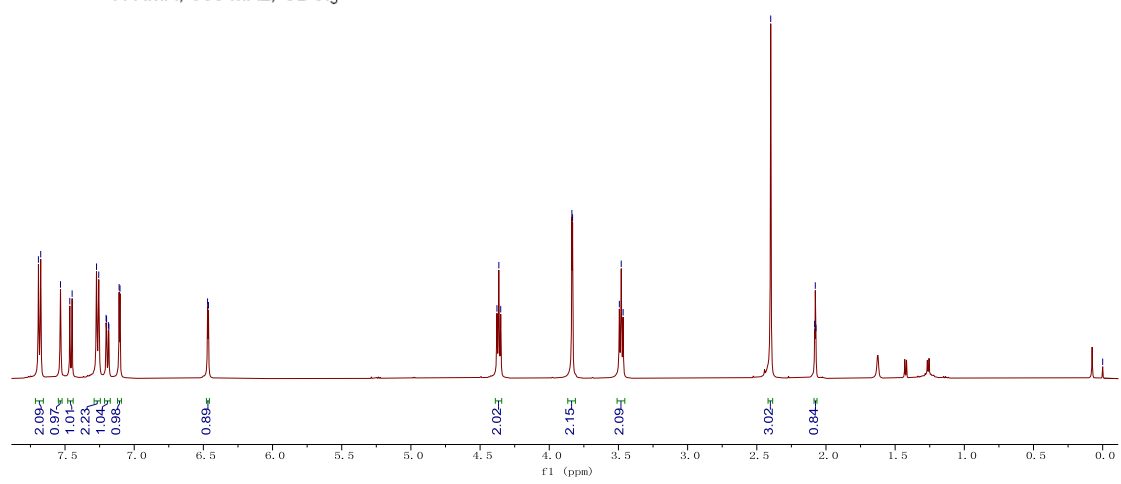

HX-2-452.fid

144.159  
136.644  
135.101  
129.824  
128.846  
127.709  
127.628  
123.035  
122.406

115.530  
112.360

102.297

77.414  
77.161  
76.906  
76.727  
74.358

46.388  
46.028

38.414

21.669

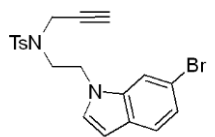

<sup>13</sup>C NMR, 125 MHz, CDCl<sub>3</sub>

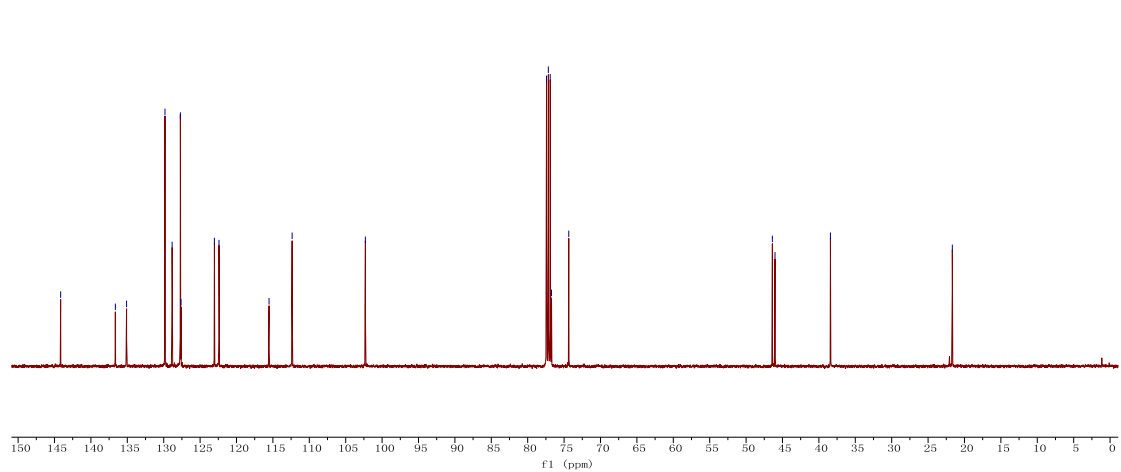

***N*-(2-(7-bromo-1*H*-indol-1-yl)ethyl)-4-methyl-*N*-(prop-2-yn-1-yl)benzenesulfonamide (**1r**)**

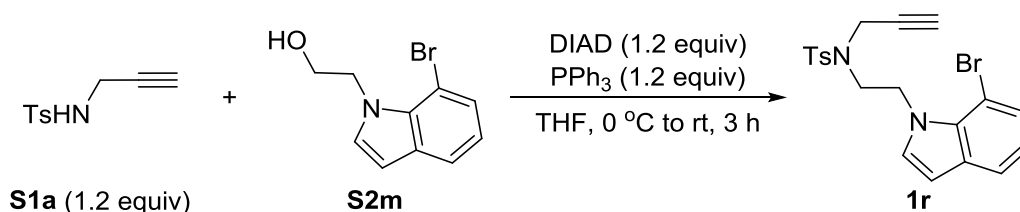

The compound **1r** (yellow solid, 125.2 mg, 30% yield) was obtained following General Procedure A from **S1a** (240.7 mg, 1.15 mmol, 1.0 equiv) and **S2m** (230.6 mg, 0.96 mmol, 1.2 equiv) using PPh<sub>3</sub> (302.4 mg, 1.15 mmol, 1.2 equiv) and DIAD (0.23 mL, 1.15 mmol, 1.2 equiv), after purification by flash column chromatography using petroleum ether/ethyl acetate = 15/1 (*R<sub>f</sub>* = 0.23) as eluent.

**<sup>1</sup>H NMR** (500 MHz, CDCl<sub>3</sub>, TMS)  $\delta$  7.70 (dt, *J* = 8.5, 2.0 Hz, 2H), 7.53 (dd, *J* = 8.0, 1.0 Hz, 1H), 7.32 (dd, *J* = 7.5, 1.0 Hz, 1H), 7.25 (d, *J* = 8.0 Hz, 2H), 7.16 (d, *J* = 3.0 Hz, 1H), 6.92 (t, *J* = 8.0 Hz, 1H), 6.50 (d, *J* = 3.0 Hz, 1H), 4.81 (t, *J* = 6.5 Hz, 2H), 3.77 (d, *J* = 2.5 Hz, 2H), 3.57 (t, *J* = 6.5 Hz, 2H), 2.39 (s, 3H), 1.91 (t, *J* = 2.5 Hz, 1H).

**<sup>13</sup>C NMR** (125 MHz, CDCl<sub>3</sub>)  $\delta$  144.0, 135.4, 132.3, 132.0, 131.8, 129.7, 127.8, 127.0, 120.9, 120.7, 103.5, 102.4, 76.8, 74.0, 48.5, 47.9, 38.5, 21.7.

**IR (KBr)**  $\nu$ (cm<sup>-1</sup>): 3299, 1347, 1160, 1092, 879, 782, 659, 577 cm<sup>-1</sup>.

**HRMS (ESI)**: calcd for C<sub>20</sub>H<sub>20</sub>BrN<sub>2</sub>O<sub>2</sub>S [M+H]<sup>+</sup>: 431.04234, found: 431.04245.

**MP**: 75-78 °C.



7.713, 7.705, 7.705, 7.696, 7.692, 7.688, 7.540, 7.526, 7.524, 7.330, 7.328, 7.319, 7.315, 7.257, 7.247, 7.241, 7.167, 7.161, 6.933, 6.917, 6.902, 6.501, 6.495, 4.822, 4.809, 4.796, 3.772, 3.686, 3.573, 3.561, 2.388, 1.916, 1.911, 1.907, -0.000

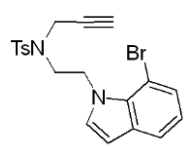

<sup>1</sup>H NMR, 500 MHz, CDCl<sub>3</sub>

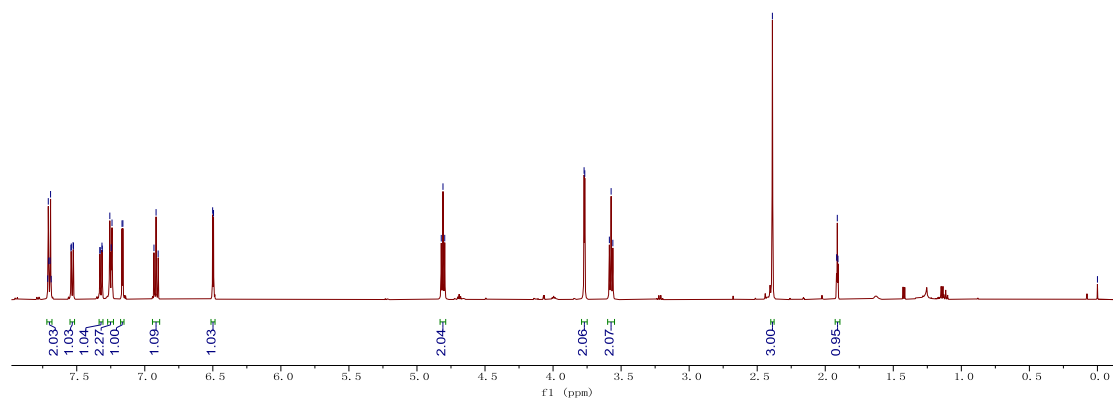

F6-94.2.f1d

143.960, 135.376, 132.275, 131.802, 129.682, 127.782, 126.987, 120.893, 120.652, 103.467, 102.424, 77.414, 77.160 CDCl3, 76.906, 76.766, 73.955, 48.457, 47.856, 38.524, 21.652

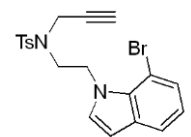

<sup>13</sup>C NMR, 125 MHz, CDCl<sub>3</sub>

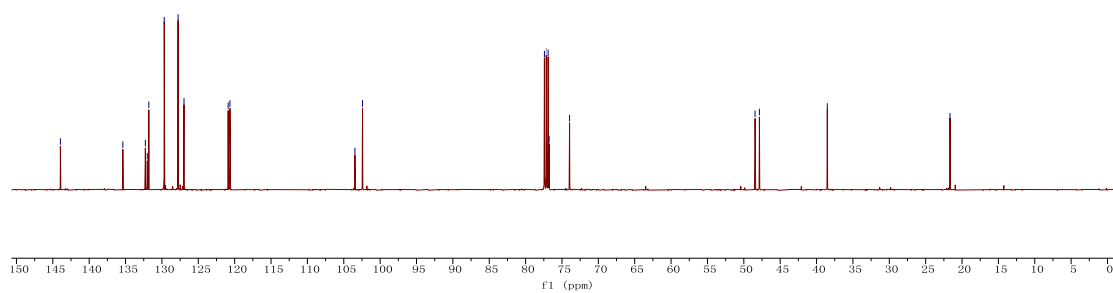

### 1-(2-(prop-2-yn-1-yloxy)ethyl)-1*H*-indole (**1s**)

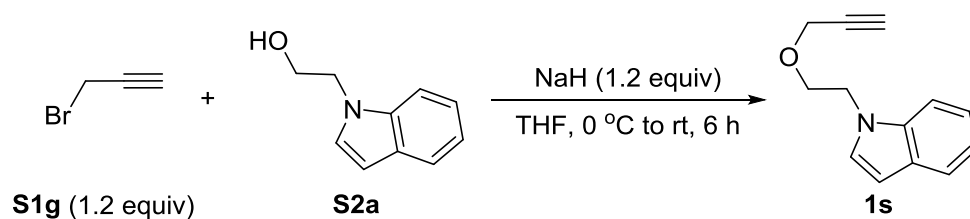

To a round-bottom flask were added **S2a** (161.2 mg, 1.0 mmol, 1.0 equiv), NaH (28.8 mg, 1.2 mmol, 1.2 equiv), and THF (3.0 mL). After stirring for 15 min, **S1g** (142.8 mg, 1.2 mmol, 1.2 equiv) was added to the mixture. After stirring at room temperature for 6 h, the mixture was filtered by using celite, concentrated under vacuum and purified by flash column chromatography using gradients of petroleum ether/ethyl acetate = 15/1 ( $R_f$  = 0.32) as eluent to give **1s** (colorless oil, 163.4 mg, 83% yield).

**<sup>1</sup>H NMR** (500 MHz, CDCl<sub>3</sub>, TMS)  $\delta$  7.62 (d,  $J$  = 8.0 Hz, 1H), 7.33 (d,  $J$  = 8.0 Hz, 1H), 7.21-7.18 (m, 1H), 7.15 (d,  $J$  = 3.5 Hz, 1H), 7.11-7.08 (m, 1H), 6.49-6.48 (m, 1H), 4.29 (t,  $J$  = 5.5 Hz, 2H), 4.06 (d,  $J$  = 2.5 Hz, 2H), 3.82 (t,  $J$  = 5.5 Hz, 2H), 2.39 (t,  $J$  = 2.5 Hz, 1H).

**<sup>13</sup>C NMR** (125 MHz, CDCl<sub>3</sub>)  $\delta$  136.1, 128.7, 128.5, 121.6, 121.1, 119.5, 109.3, 101.4, 79.4, 74.9, 68.8, 58.5, 46.1.

**IR (KBr)**  $\nu$ (cm<sup>-1</sup>): 3282, 1512, 1483, 1464, 1336, 1316, 1202, 1108, 764 cm<sup>-1</sup>.

**HRMS (ESI)**: calcd for C<sub>13</sub>H<sub>14</sub>NO [M+H]<sup>+</sup>: 200.10699, found: 200.10704.

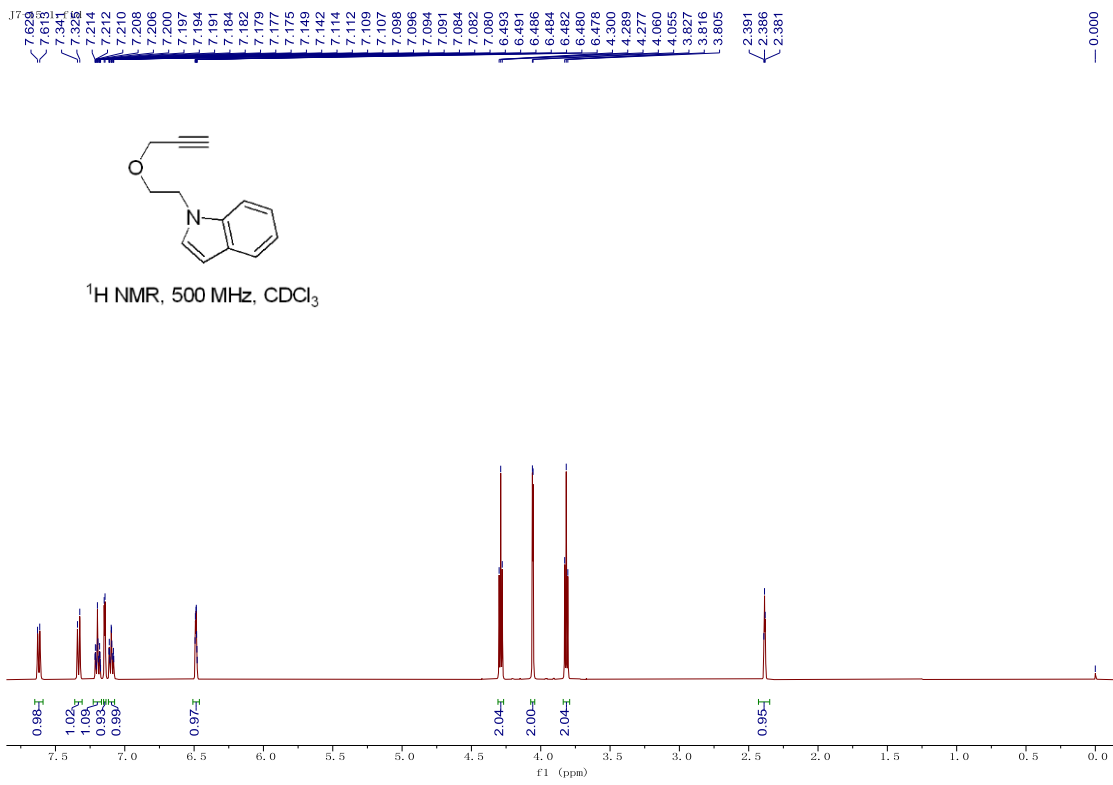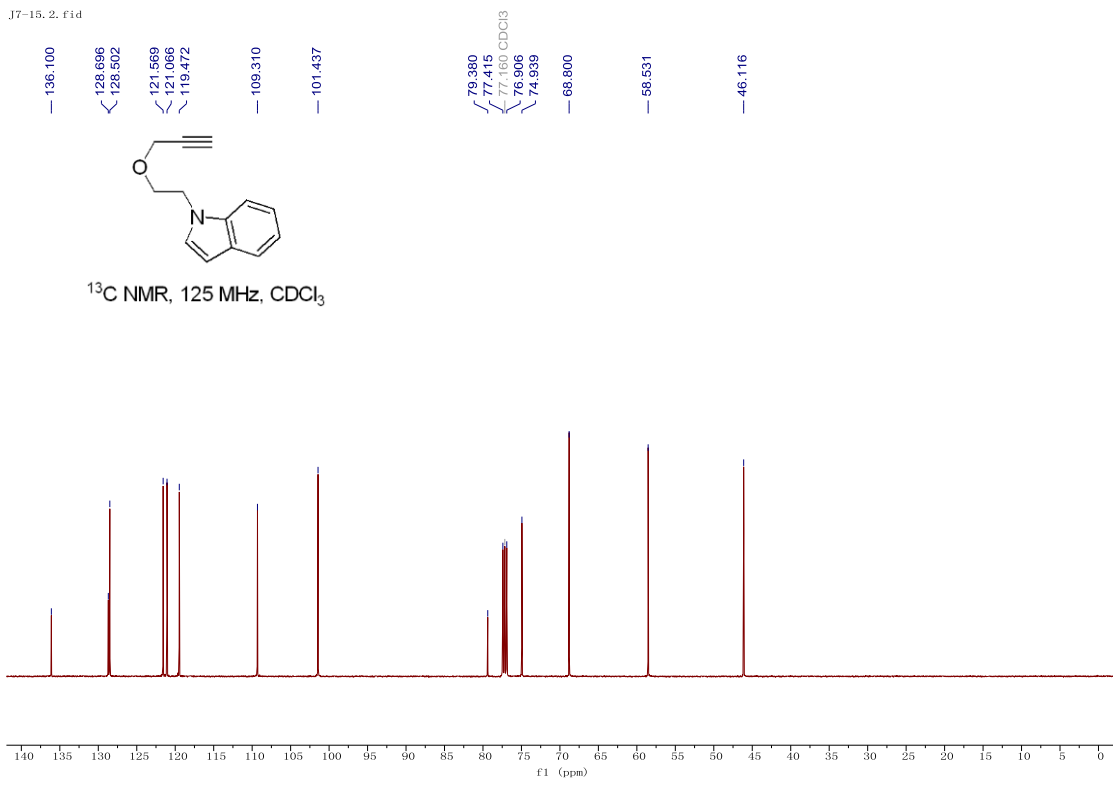

### 1-(hept-6-yn-1-yl)-1*H*-indole (**1t**)

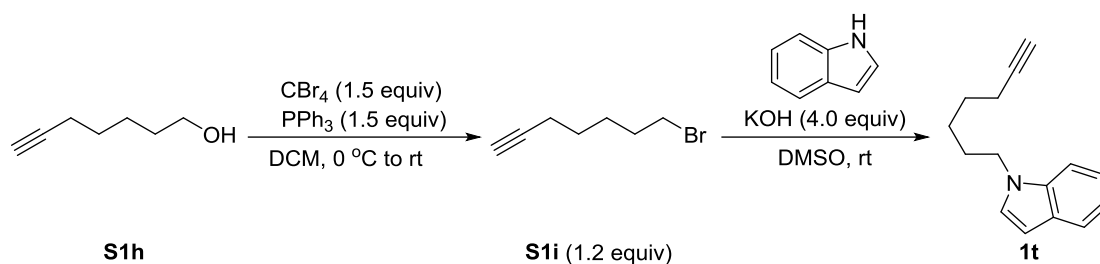

To a round-bottom flask was added **S1h** (189.6 mg, 1.69 mmol, 1.0 equiv) dissolved in dry  $\text{DCM}$  (10.0 mL), and the solution was cooled on ice. Then, triphenylphosphine (666.2 mg, 2.54 mmol, 1.5 equiv) was added, upon complete dissolution, tetrabromomethane (842.3 mg, 2.54 mmol, 1.5 equiv) was added slowly. The reaction mixture was brought to room temperature and stirred for 1 h. After completion, the solvent was removed under reduced pressure and purified by flash column chromatography using gradients of cyclohexane ( $R_f = 0.45$ ) as eluent to give **S1i** (colorless oil, 274.8 mg, 93% yield)<sup>[1]</sup>.

To a round-bottom flask were added 1*H*-indol (153.3 mg, 1.30 mmol, 1.0 equiv),  $\text{KOH}$  (291.8 mg, 5.20 mmol, 4.0 equiv), and  $\text{DMSO}$  (10.0 mL). After stirring for 1 h, **S1i** (1.57 mmol, 274.8 mg, 1.2 equiv) was added to the mixture. After stirring at room temperature and was complete as monitored by TLC. The mixture was extracted three times with water and ethyl acetate, dried over anhydrous  $\text{Na}_2\text{SO}_4$ , concentrated under vacuum and purified by flash column chromatography using gradients of petroleum ether/ethyl acetate = 50/1 ( $R_f = 0.33$ ) as eluent to give **1t** (yellow oil, 195.6 mg, 59% yield).

**$^1\text{H}$  NMR** (500 MHz,  $\text{CDCl}_3$ , TMS)  $\delta$  7.62 (dd,  $J = 8.0, 1.5$  Hz, 1H), 7.32 (d,  $J = 8.5$  Hz, 1H), 7.21-7.18 (m, 1H), 7.11-7.07 (m, 2H), 6.48 (d,  $J = 3.5$  Hz, 1H), 4.10 (t,  $J = 7.5$  Hz, 2H), 2.16 (td,  $J = 7.5, 2.5$  Hz, 2H), 1.93 (t,  $J = 2.5$  Hz, 1H), 1.86-1.80 (m, 2H), 1.56-1.50 (m, 2H), 1.45-1.39 (m, 2H).

**$^{13}\text{C}$  NMR** (125 MHz,  $\text{CDCl}_3$ )  $\delta$  136.0, 128.7, 127.9, 121.5, 121.1, 119.3, 109.4, 101.0, 84.3, 68.6, 46.3, 29.9, 28.1, 26.2, 18.4.

**IR** (KBr)  $\nu$  ( $\text{cm}^{-1}$ ): 3299, 1632, 1608, 1602, 1596, 1463, 1353, 743  $\text{cm}^{-1}$ .

**HRMS** (ESI): calcd for  $\text{C}_{15}\text{H}_{18}\text{N}$  [ $\text{M}+\text{H}$ ] $^+$ : 212.14338, found: 212.14340.

7.632  
7.629  
7.616  
7.614  
7.538  
7.516  
7.509  
7.195  
7.192  
7.180  
7.178  
7.106  
7.104  
7.089  
7.076  
7.071  
6.480  
6.473

4.115  
4.100  
4.086  
2.172  
2.167  
2.158  
2.153  
2.144  
2.139  
1.935  
1.930  
1.925  
1.863  
1.849  
1.834  
1.824  
1.818  
1.804  
1.802  
1.546  
1.545  
1.535  
1.532  
1.527  
1.518  
1.512  
1.504  
1.450  
1.448  
1.439  
1.433  
1.431  
1.426  
1.418  
1.413  
1.408  
1.404  
1.400  
1.389  
0.000

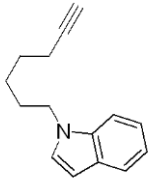

<sup>1</sup>H NMR, 500 MHz, CDCl<sub>3</sub>

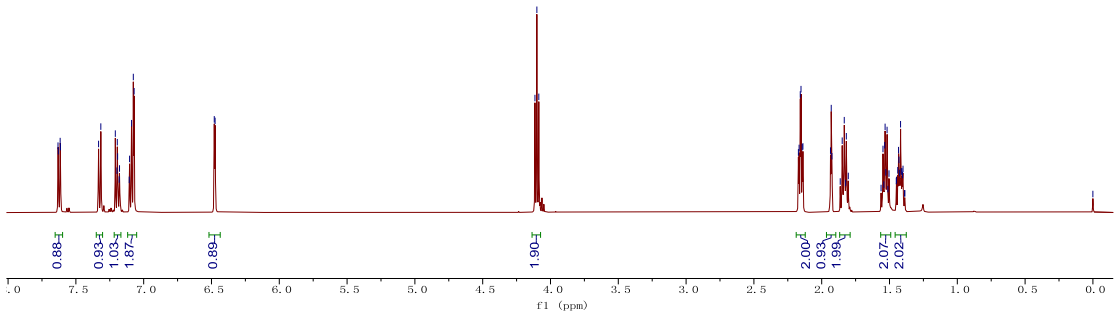

F6-130R. 2. f1d

135.988  
128.679  
127.879  
121.451  
121.066  
119.307  
109.436  
101.044  
84.282  
77.414  
77.160 CDCl<sub>3</sub>  
76.905  
68.635  
46.335  
29.867  
28.129  
26.191  
18.393

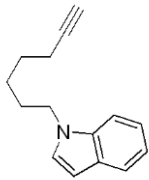

<sup>13</sup>C NMR, 125 MHz, CDCl<sub>3</sub>

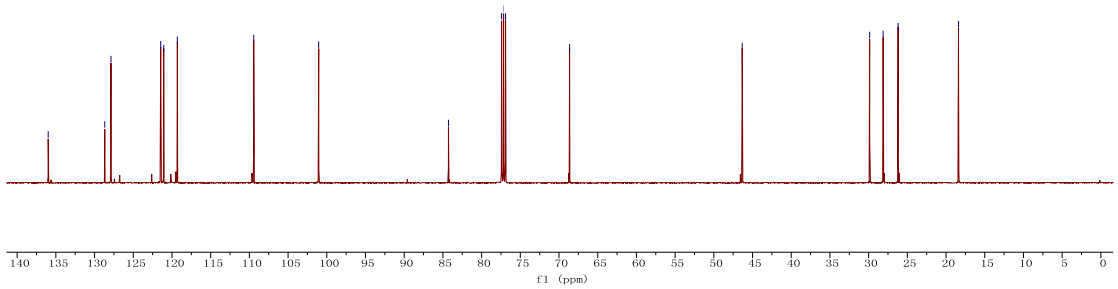

### *N*-(2-(1*H*-pyrrol-1-yl)ethyl)-4-methyl-*N*-(prop-2-yn-1-yl)benzenesulfonamide (**1v**)

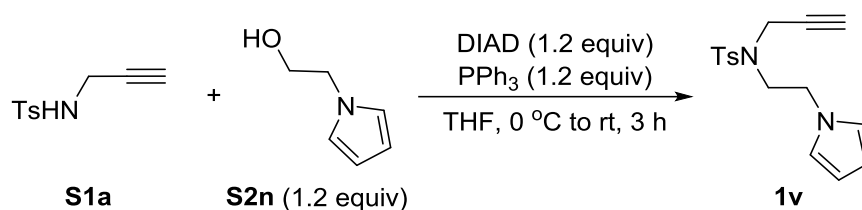

The compound **1v** (yellow oil, 364.3 mg, 48% yield) was obtained following General Procedure A from **S1a** (522.8 mg, 2.5 mmol, 1.0 equiv) and **S2n** (333.4 mg, 3.0 mmol, 1.2 equiv) using PPh<sub>3</sub> (786.9 mg, 3.0 mmol, 1.2 equiv) and DIAD (0.59 mL, 3.0 mmol, 1.2 equiv), after purification by flash column chromatography using petroleum ether/ethyl acetate = 8/1 (*R<sub>f</sub>* = 0.24) as eluent.

**<sup>1</sup>H NMR** (500 MHz, CDCl<sub>3</sub>, TMS)  $\delta$  7.71 (dt, *J* = 8.5, 2.0 Hz, 2H), 7.28 (d, *J* = 8.0 Hz, 2H), 6.67 (t, *J* = 2.0 Hz, 2H), 6.15 (t, *J* = 2.0 Hz, 2H), 4.13 (t, *J* = 6.5 Hz, 2H), 3.70 (d, *J* = 2.5 Hz, 2H), 3.45 (t, *J* = 6.5 Hz, 2H), 2.42 (s, 3H), 2.03 (t, *J* = 2.5 Hz, 1H).

**<sup>13</sup>C NMR** (125 MHz, CDCl<sub>3</sub>)  $\delta$  143.9, 135.7, 129.7, 127.7, 120.8, 109.0, 77.0, 73.9, 49.3, 47.9, 38.0, 21.6.

**IR** (KBr)  $\nu$  (cm<sup>-1</sup>): 3274, 2926, 1500, 1347, 1287, 1160, 1090, 728 cm<sup>-1</sup>.

**HRMS** (ESI): calcd for C<sub>16</sub>H<sub>19</sub>N<sub>2</sub>O<sub>2</sub>S [M+H]<sup>+</sup>: 303.11617, found: 303.11612.

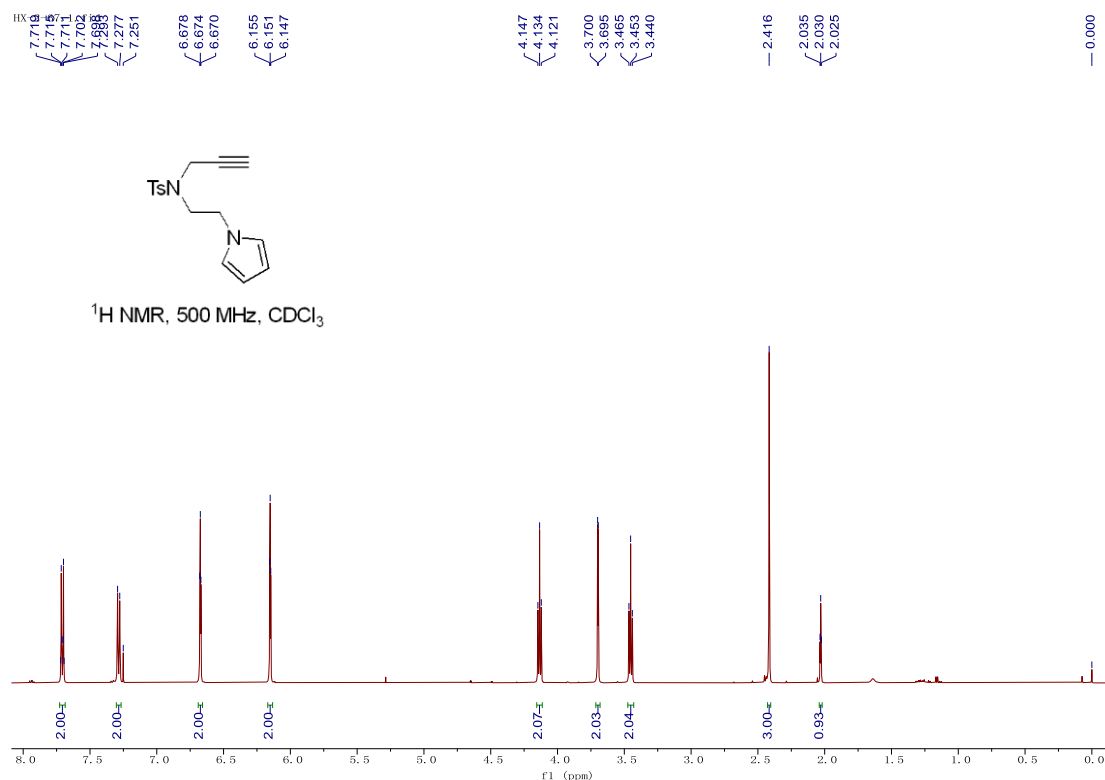

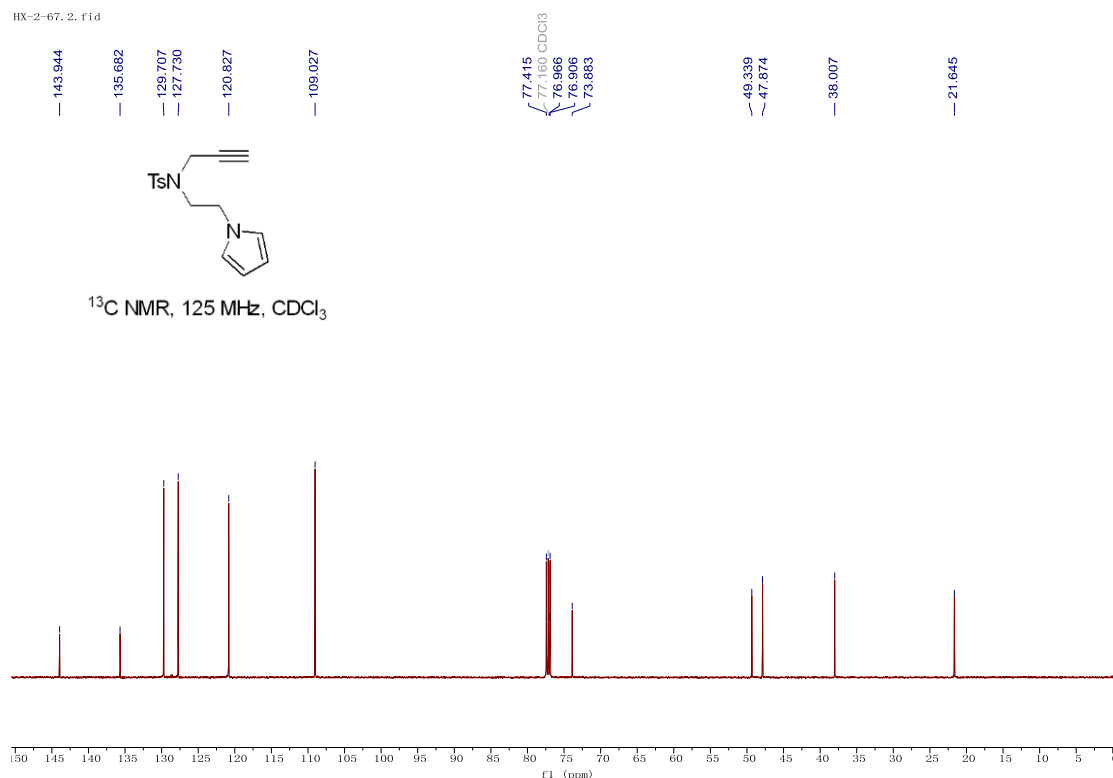

***N*-(2-(1*H*-indol-1-yl)ethyl)-*N*-(but-2-yn-1-yl)-4-methylbenzenesulfonamide (**1w**)**

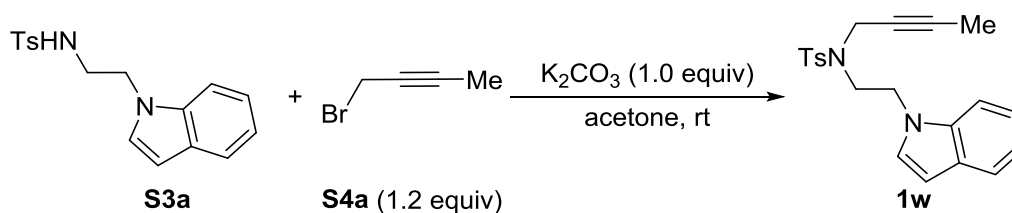

To a round-bottom flask were added **S3a** (157.2 mg, 0.5 mmol, 1.0 equiv), K<sub>2</sub>CO<sub>3</sub> (69.1 mg, 0.5 mmol, 1.0 equiv), and acetone (2.0 mL). After stirring for 15 min, **S4a** (79.8 mg, 0.6 mmol, 1.2 equiv) was added to the mixture. After stirring at room temperature for 3 h, the mixture was concentrated under vacuum and purified by flash column chromatography using of petroleum ether/ethyl acetate = 8/1 (*R<sub>f</sub>* = 0.29) as eluent to give **1w** (white solid, 165.9 mg, 91% yield). Characterization data match our previously reported one for this product<sup>[2]</sup>.

**<sup>1</sup>H NMR** (500 MHz, CDCl<sub>3</sub>, TMS)  $\delta$  7.69 (d, *J* = 8.0 Hz, 2H), 7.62 (d, *J* = 8.0 Hz, 1H), 7.41 (d, *J* = 8.0 Hz, 1H), 7.25 (d, *J* = 8.0 Hz, 2H), 7.21 (t, *J* = 8.0 Hz, 1H), 7.12-7.09 (m, 2H), 6.50 (d, *J* = 3.0 Hz, 1H), 4.41 (t, *J* = 7.0 Hz, 2H), 3.81 (q, *J* = 2.5 Hz, 2H), 3.47 (t, *J* = 7.0 Hz, 2H), 2.39 (s, 3H), 1.54 (t, *J* = 2.5 Hz, 3H).

$^{13}\text{C}$  NMR (125 MHz,  $\text{CDCl}_3$ )  $\delta$  143.8, 135.9, 135.5, 129.6, 128.8, 128.1, 127.8, 121.9, 121.2, 119.7, 109.3, 102.0, 82.1, 72.0, 46.6, 46.0, 39.0, 21.6, 3.4.

***N*-(2-(1*H*-indol-1-yl)ethyl)-4-methyl-*N*-(3-phenylprop-2-yn-1-yl)benzenesulfonamide (**1x**)**

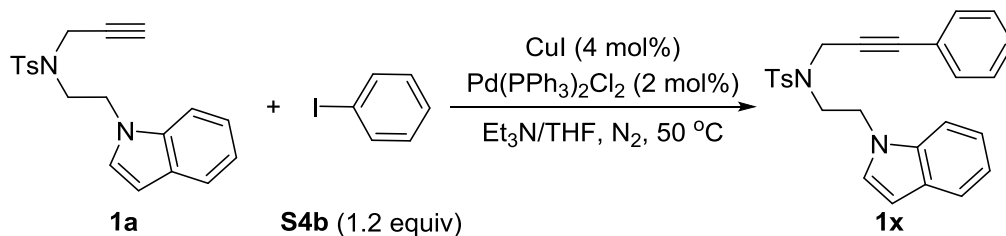

Under  $\text{N}_2$ ,  $\text{Et}_3\text{N}$  (3.0 mL) and THF (2.0 mL) was added to a round-bottom flask with **1a** (178.2 mg, 0.5 mmol, 1.0 equiv), iodobenzene (122.4 mg, 0.6 mmol, 1.2 equiv),  $\text{Pd}(\text{PPh}_3)_2\text{Cl}_2$  (7.0 mg, 0.01 mmol, 2 mol%), and  $\text{CuI}$  (3.8 mg, 0.02 mmol, 4 mol%). Then, the reaction was stirred at 50  $^\circ\text{C}$  and was complete as monitored by TLC. Upon completion, the mixture was concentrated under reduced pressure, and was purified by flash column chromatography using petroleum ether/ethyl acetate = 5/1 ( $R_f$  = 0.35) as eluent to give **1x** (white solid, 142.3 mg, 66% yield). Characterization data match the previously reported one for this product<sup>[2]</sup>.

$^1\text{H}$  NMR (500 MHz,  $\text{CDCl}_3$ , TMS)  $\delta$  7.74 (d,  $J$  = 8.0 Hz, 2H), 7.62 (d,  $J$  = 8.0 Hz, 1H), 7.43 (dd,  $J$  = 8.0, 1.0 Hz, 1H), 7.30 -7.27 (m, 1H), 7.25-7.21 (m, 4H), 7.19-7.15 (m, 1H), 7.15 (d,  $J$  = 3.5 Hz, 1H), 7.12 -7.09 (m, 1H), 7.07-7.05 (m, 2H), 6.51 (dd,  $J$  = 3.5, 1.0 Hz, 1H), 4.47 (t,  $J$  = 6.5 Hz, 2H), 4.05 (s, 2H), 3.57 (t,  $J$  = 6.5 Hz, 2H), 2.33 (s, 3H).

$^{13}\text{C}$  NMR (125 MHz,  $\text{CDCl}_3$ )  $\delta$  144.0, 135.9, 135.5, 131.7, 129.8, 128.8, 128.7, 128.3, 128.1, 127.8, 122.01, 121.96, 121.2, 119.8, 109.4, 102.1, 85.9, 81.9, 46.7, 46.2, 39.3, 21.6.



### 1,4-diphenylbut-2-yne (2d)

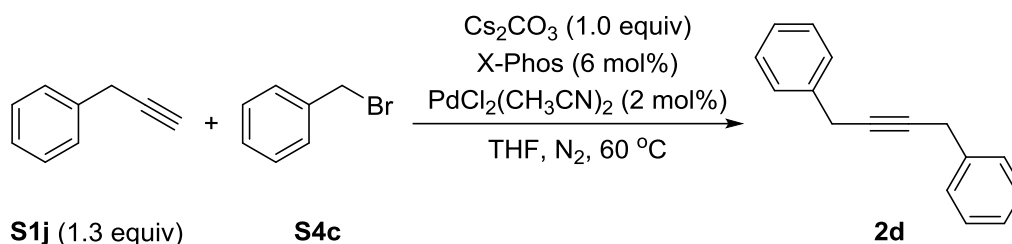

Under nitrogen atmosphere, THF (10.0 mL) and **S4c** (342.1 mg, 2.0 mmol, 1.0 equiv) were added to a round-bottom flask which equipped with  $\text{PdCl}_2(\text{CH}_3\text{CN})_2$  (10.4 mg, 0.04 mmol, 2 mol%), X-Phos (57.2 mg, 0.12 mmol, 6 mol%) and  $\text{Cs}_2\text{CO}_3$  (684.2 mg, 2.1 mmol, 1.1 equiv). Then, the **S1j** (302.0 mg, 2.6 mmol, 1.3 equiv) was added and the mixture was heated to 60 °C and stirred at this temperature overnight. After cooling to room temperature, the mixture was concentrated under reduced pressure, and was purified by flash column chromatography using petroleum ether ( $R_f = 0.67$ ) as eluent to give **2d** (colorless oil, 100.9 mg, 24% yield). Characterization data match the previously reported one for this product<sup>[3]</sup>.

$^1\text{H NMR}$  (600 MHz,  $\text{CDCl}_3$ , TMS)  $\delta$  7.37-7.36 (m, 4H), 7.32-7.29 (m, 4H), 7.23-7.20 (m, 2H), 3.64 (s, 4H).

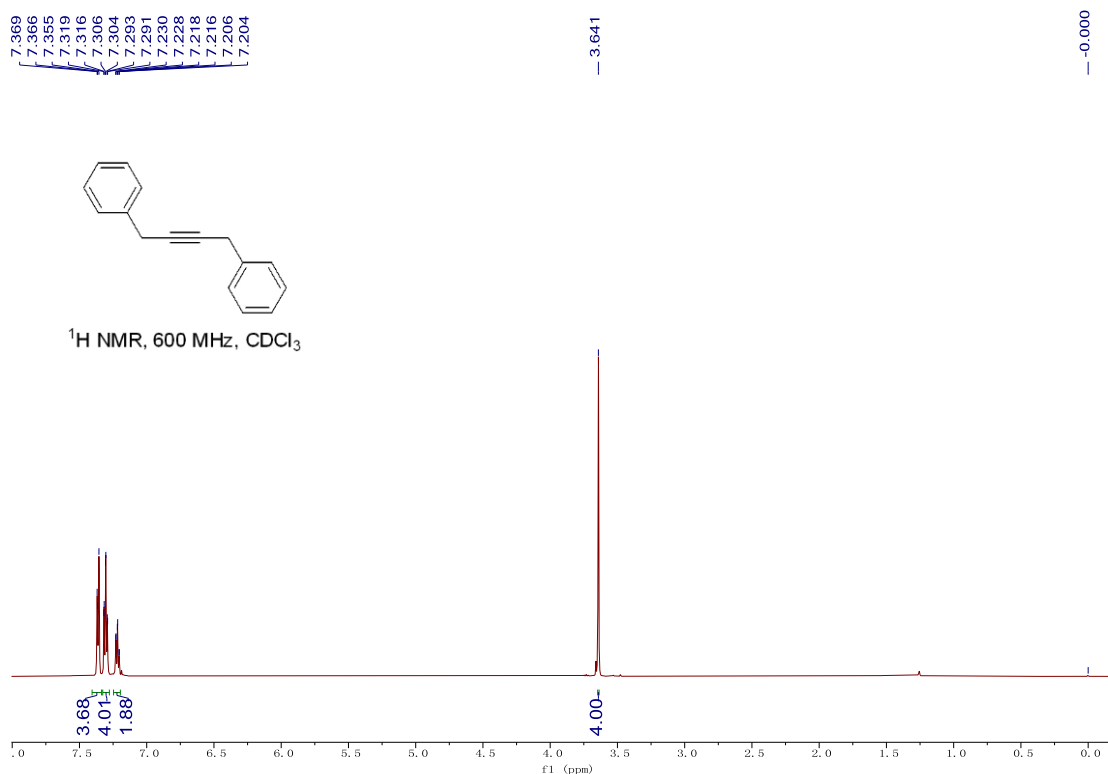

#### 4. General Procedure B for the Synthesis of 3 and 5

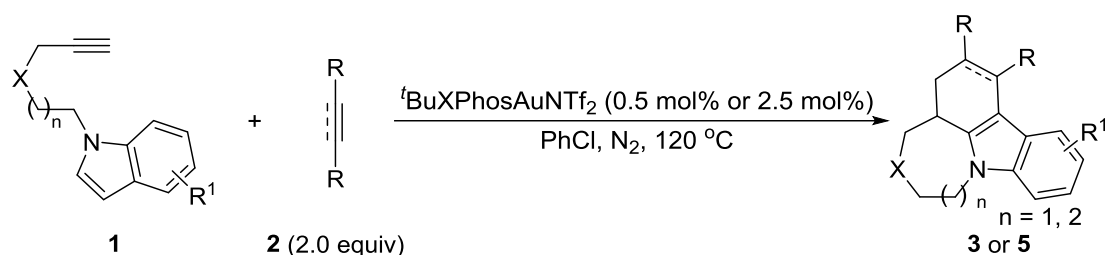

Under nitrogen atmosphere, anhydrous PhCl (1.0 mL) was added to a sealed tube which equipped with the corresponding substrates **1** (1.0 equiv), **2** (2.0 equiv) and  $[t\text{BuXPhosAuNTf}_2]$  (0.5 mol% or 2.5 mol%). The mixture was stirred at 120 °C and was complete as monitored by TLC. The mixture was concentrated under vacuum and purified by flash column chromatography on silica gel to afford **3** or **5**.

#### Dimethyl 3-tosyl-1,2,3,4,4a,5-hexahydro-[1,4]diazepino[6,7,1-*jk*]carbazole-6,7-dicarboxylate (**3a**)

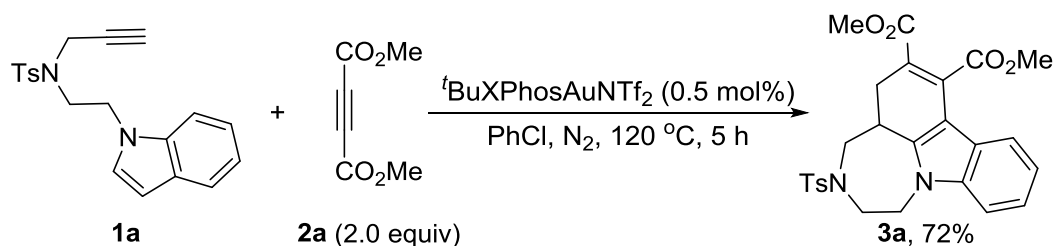

The compound **3a** (yellow solid, 35.6 mg, 72% yield) was obtained following General Procedure B from **1a** (35.2 mg, 0.1 mmol, 1.0 equiv) and **2a** (28.4 mg, 0.2 mmol, 2.0 equiv) using  $[t\text{BuXPhosAuNTf}_2]$  (0.45 mg, 0.5 mol%) after purification by flash column chromatography using petroleum ether/DCM/THF = 8/4/1 ( $R_f = 0.33$ ) as eluent.  $^1\text{H NMR}$  (500 MHz,  $\text{CDCl}_3$ , TMS)  $\delta$  7.67 (d,  $J = 8.0$  Hz, 2H), 7.36 (d,  $J = 8.0$  Hz, 1H), 7.32 (d,  $J = 8.0$  Hz, 2H), 7.24-7.18 (m, 2H), 7.14-7.11 (m, 1H), 4.50 (dd,  $J = 14.5, 4.5$  Hz, 1H), 4.28-4.23 (m, 1H), 4.12-4.06 (m, 2H), 4.00 (s, 3H), 3.79 (s, 3H), 3.58-3.51 (m, 1H), 3.10 (dd,  $J = 17.0, 9.0$  Hz, 1H), 3.02 (dd,  $J = 14.5, 10.5$  Hz, 1H), 2.75 (dd,  $J = 13.5, 10.5$  Hz, 1H), 2.45-2.39 (m, 4H).

$^{13}\text{C}$  NMR (125 MHz,  $\text{CDCl}_3$ )  $\delta$  169.4, 166.4, 144.2, 143.2, 137.84, 137.82, 135.5, 130.2, 127.1, 123.5, 122.8, 122.0, 118.6, 113.8, 109.9, 108.3, 53.7, 52.7, 52.1, 49.2, 46.9, 35.7, 28.2, 21.6.

IR (KBr)  $\nu$  ( $\text{cm}^{-1}$ ): 1733, 1707, 1460, 1435, 1332, 1257, 1203, 1107, 748  $\text{cm}^{-1}$ .

HRMS (ESI): calcd for  $\text{C}_{26}\text{H}_{27}\text{N}_2\text{O}_6\text{S}$   $[\text{M}+\text{H}]^+$ : 495.15843, found: 495.15884.

MP: 192-194  $^\circ\text{C}$ .

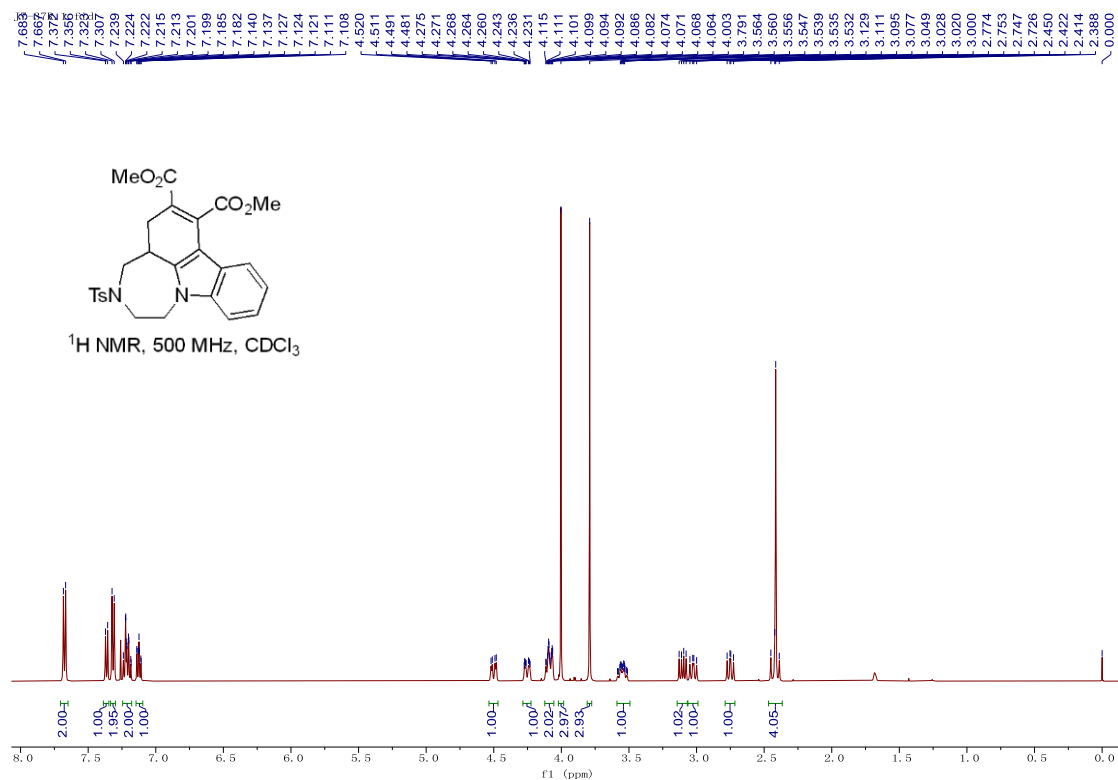

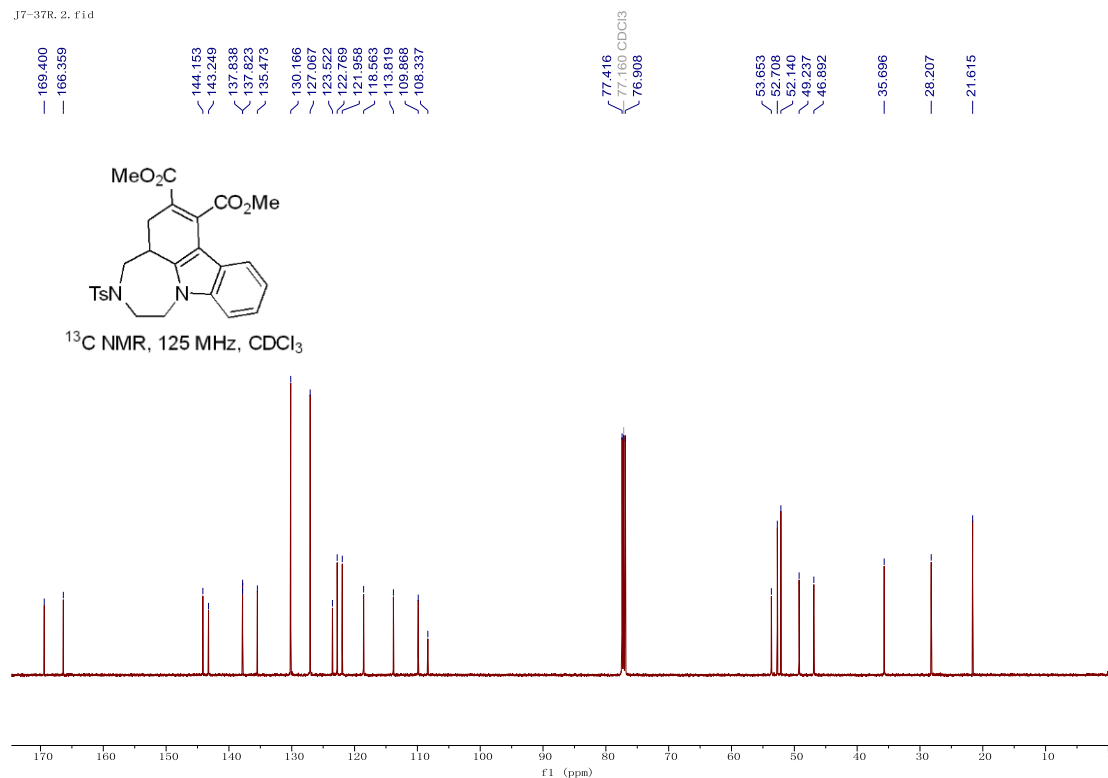

**Dimethyl 3-(phenylsulfonyl)-1,2,3,4,4a,5-hexahydro-[1,4]diazepino[6,7,1-*jk*]carbazole-6,7-dicarboxylate (**3b**)**

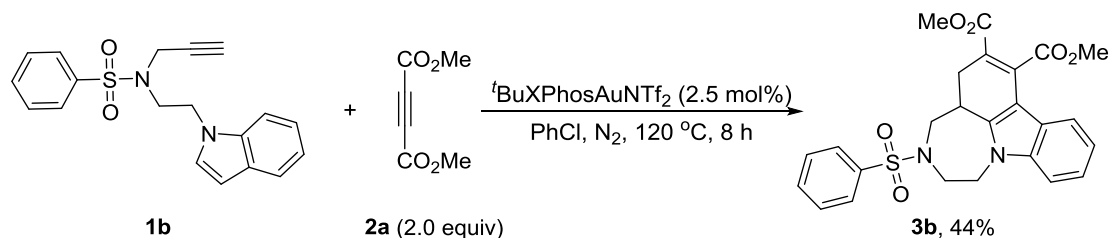

The compound **3b** (white solid, 21.1 mg, 44% yield) was obtained following General Procedure B from **1b** (33.8 mg, 0.1 mmol, 1.0 equiv) and **2a** (28.4 mg, 0.2 mmol, 2.0 equiv) using  $[\text{tBuXPhosAuNTf}_2]$  (2.25 mg, 2.5 mol%) after purification by flash column chromatography using petroleum ether/DCM/THF = 15/4/1 ( $R_f$  = 0.30) as eluent.  $^1\text{H}$  NMR (500 MHz,  $\text{CDCl}_3$ , TMS)  $\delta$  7.84-7.81 (m, 2H), 7.62 (tt,  $J$  = 7.5, 1.0 Hz, 1H), 7.55 (tt,  $J$  = 8.0, 1.5 Hz, 2H), 7.38 (dt,  $J$  = 8.0, 1.0 Hz, 1H), 7.24-7.20 (m, 2H), 7.16-7.13 (m, 1H), 4.55 (ddd,  $J$  = 14.5, 5.0, 1.0 Hz, 1H), 4.34-4.29 (m, 1H), 4.16-4.12 (m, 2H), 4.01 (s, 3H), 3.80 (s, 3H), 3.65-3.58 (m, 1H), 3.14 (dd,  $J$  = 17.0, 9.0 Hz, 1H), 3.07 (ddd,  $J$  = 14.5, 10.5, 1.5 Hz, 1H), 2.80 (dd,  $J$  = 13.5, 10.5 Hz, 1H), 2.45 (dd,  $J$  = 17.0, 14.0 Hz, 1H).

$^{13}\text{C}$  NMR (125 MHz,  $\text{CDCl}_3$ )  $\delta$  169.4, 166.4, 143.2, 138.6, 137.9, 133.3, 129.6, 127.1, 123.6, 122.9, 122.1, 118.7, 113.9, 109.8, 108.6, 53.8, 52.8, 52.2, 49.4, 47.1, 36.0, 28.3.

IR (KBr)  $\nu(\text{cm}^{-1})$ : 1731, 1694, 1463, 1434, 1331, 1257, 1164, 1107, 739  $\text{cm}^{-1}$ .

HRMS (ESI): calcd for  $\text{C}_{25}\text{H}_{25}\text{N}_2\text{O}_6\text{S}$   $[\text{M}+\text{H}]^+$ : 481.14278, found: 481.14313.

MP: 89-91  $^\circ\text{C}$ .

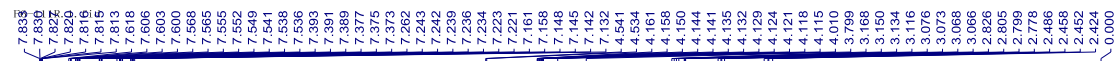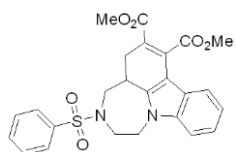

$^1\text{H}$  NMR, 500 MHz,  $\text{CDCl}_3$

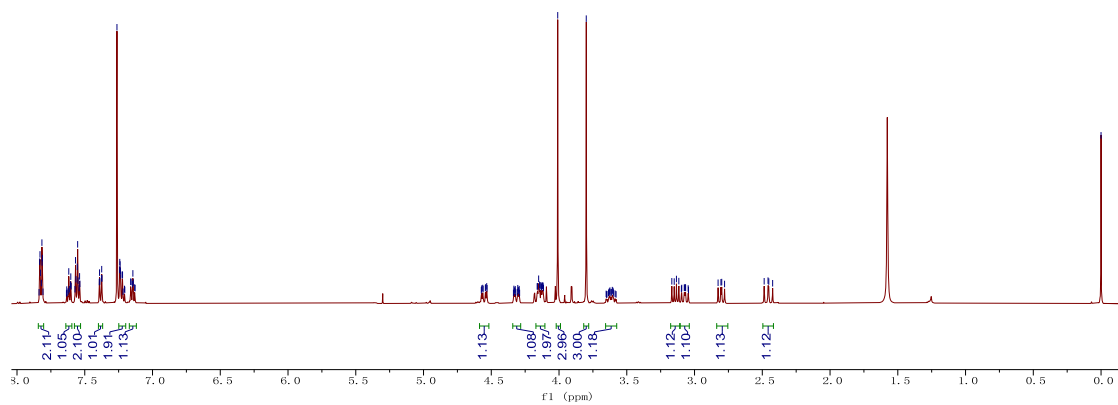

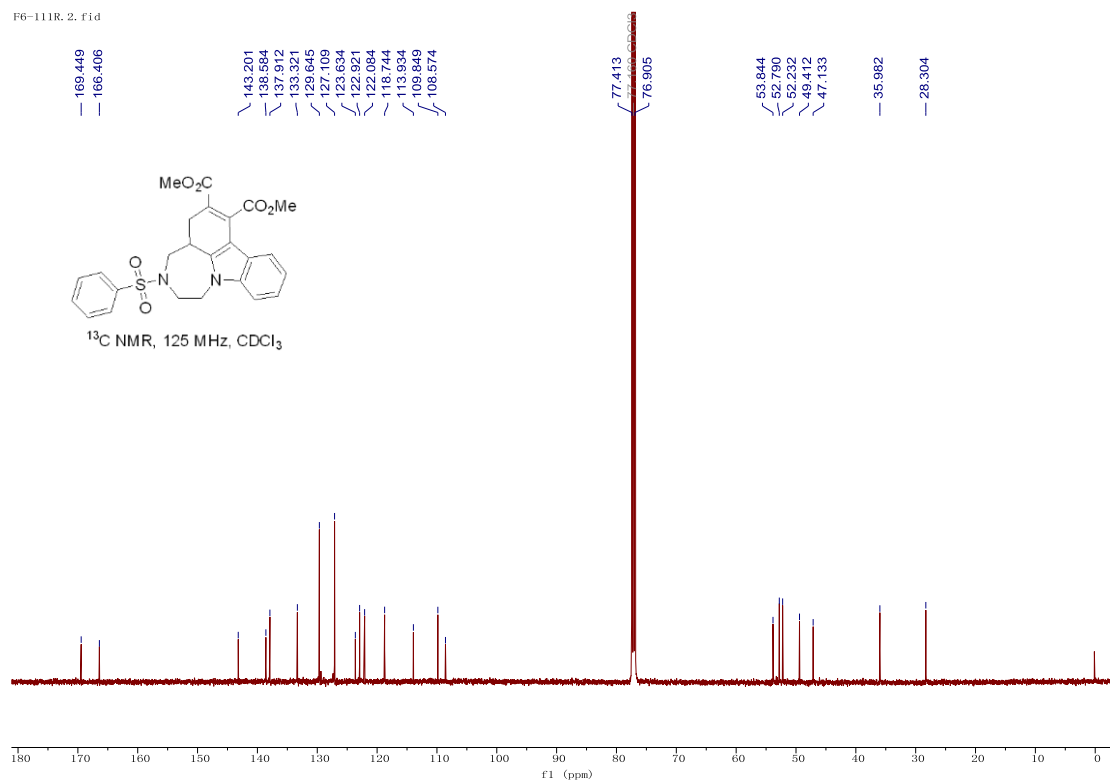

**Dimethyl 3-(mesitylsulfonyl)-1,2,3,4,4a,5-hexahydro-[1,4]diazepino[6,7,1-*jk*]  
carbazole-6,7-dicarboxylate (**3c**)**

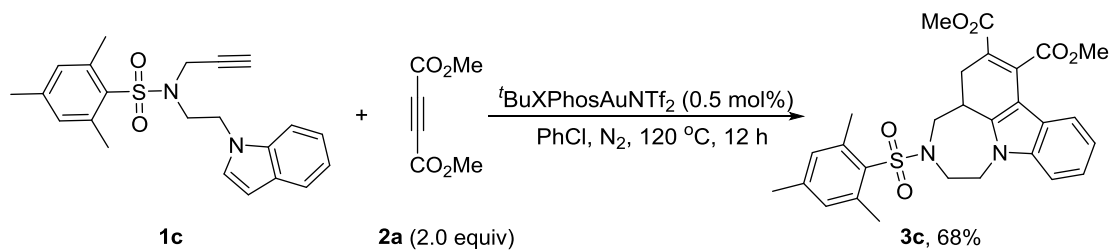

The compound **3c** (yellow solid, 35.6 mg, 68% yield) was obtained following General Procedure B from **1c** (38.0 mg, 0.1 mmol, 1.0 equiv) and **2a** (28.4 mg, 0.2 mmol, 2.0 equiv) using [<sup>t</sup>BuXPhosAuNTf<sub>2</sub>] (0.45 mg, 0.5 mol%) after purification by flash column chromatography using petroleum ether/DCM/THF =15/4/1 (R<sub>f</sub> = 0.20) as eluent.

<sup>1</sup>H NMR (500 MHz, CDCl<sub>3</sub>, TMS) δ 7.39 (d, *J* = 8.0 Hz, 1H), 7.25 (d, *J* = 8.0 Hz, 1H), 7.23-7.20 (m, 1H), 7.16-7.12 (m, 1H), 6.99 (s, 2H), 4.52 (dd, *J* = 14.5, 4.0 Hz, 1H), 4.27-4.22 (m, 1H), 4.14 (dd, *J* = 14.5, 4.0 Hz, 1H), 4.01 (s, 3H), 3.85-3.74 (m, 5H), 3.28 (dd, *J* = 15.0, 10.5 Hz, 1H), 3.08-3.01 (m, 2H), 2.60 (s, 6H), 2.40 (dd, *J* = 17.0, 14.5 Hz, 1H), 2.32 (s, 3H).

$^{13}\text{C}$  NMR (125 MHz,  $\text{CDCl}_3$ )  $\delta$  169.5, 166.4, 143.7, 143.2, 140.3, 138.00, 137.96, 132.3, 132.1, 123.7, 122.8, 122.0, 118.6, 113.8, 109.9, 108.4, 52.7, 52.5, 52.1, 48.0, 47.4, 35.9, 28.3, 23.0, 21.1.

IR (KBr)  $\nu$  ( $\text{cm}^{-1}$ ): 1703, 1459, 1427, 1320, 1238, 1156, 1098, 1026, 734  $\text{cm}^{-1}$ .

HRMS (ESI): calcd for  $\text{C}_{28}\text{H}_{31}\text{N}_2\text{O}_6\text{S}$   $[\text{M}+\text{H}]^+$ : 523.18973, found: 523.19012.

MP: 94-98  $^\circ\text{C}$ .

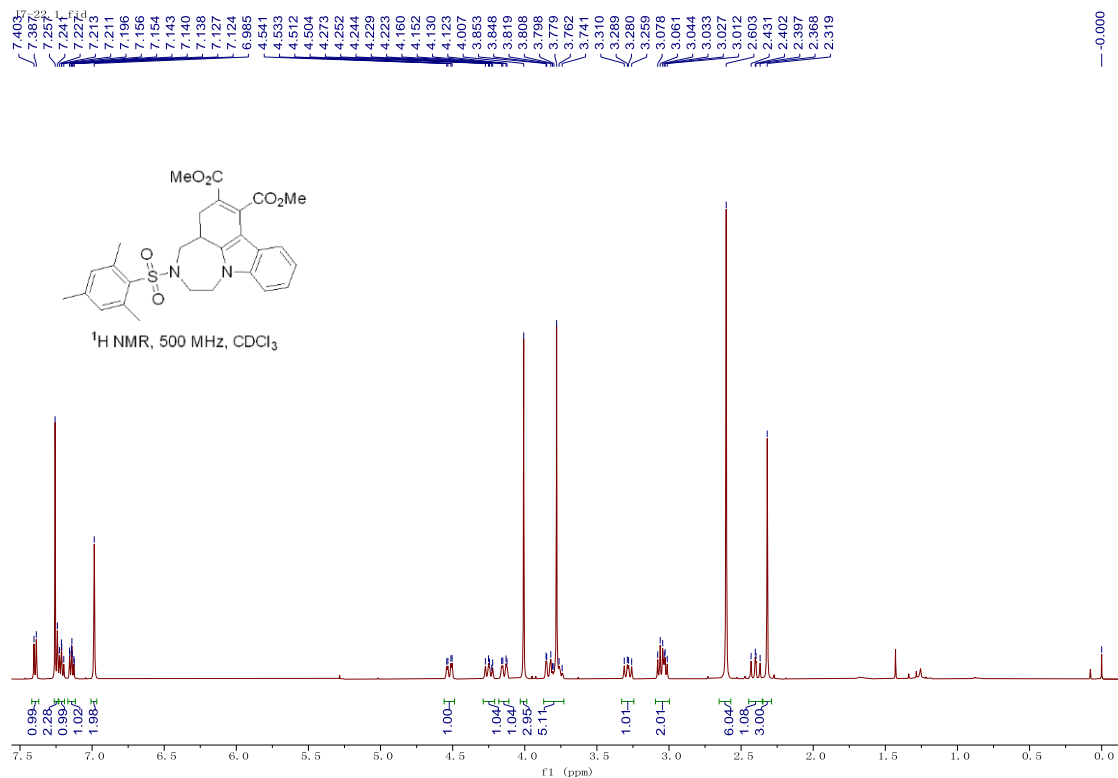

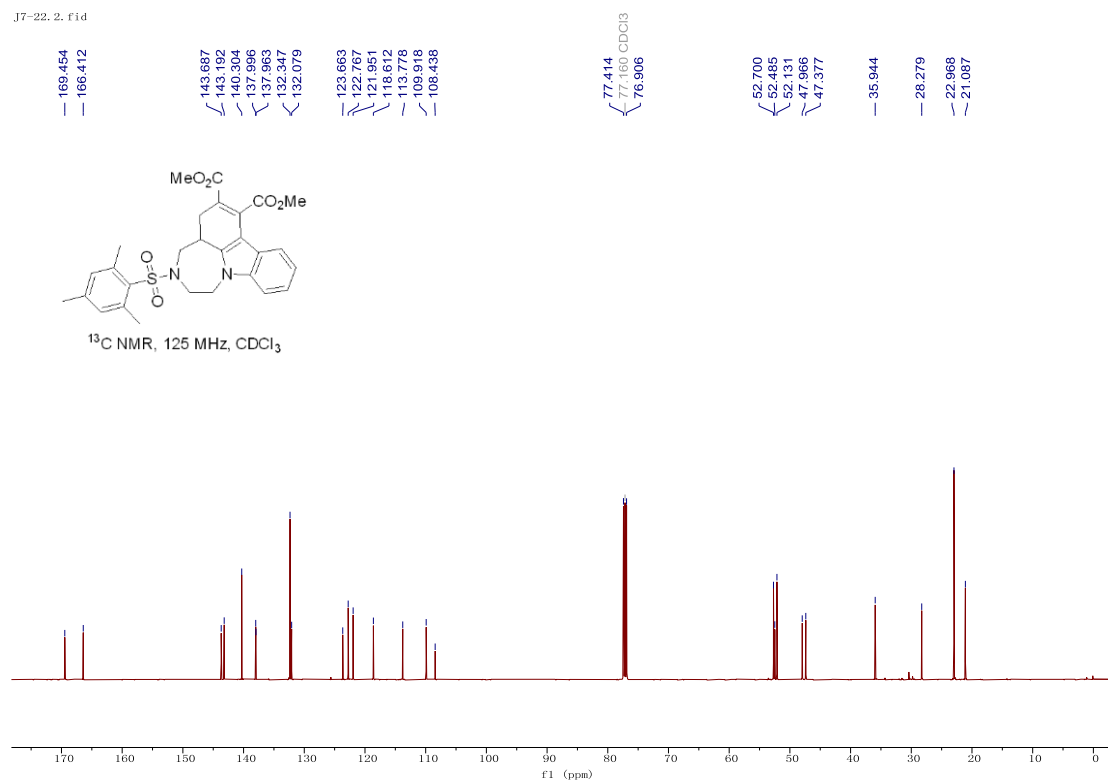

**Dimethyl 3-((2,4,6-triisopropylphenyl)sulfonyl)-1,2,3,4,4a,5-hexahydro-[1,4]diazepino[6,7,1-*jk*]carbazole-6,7-dicarboxylate (**3d**)**

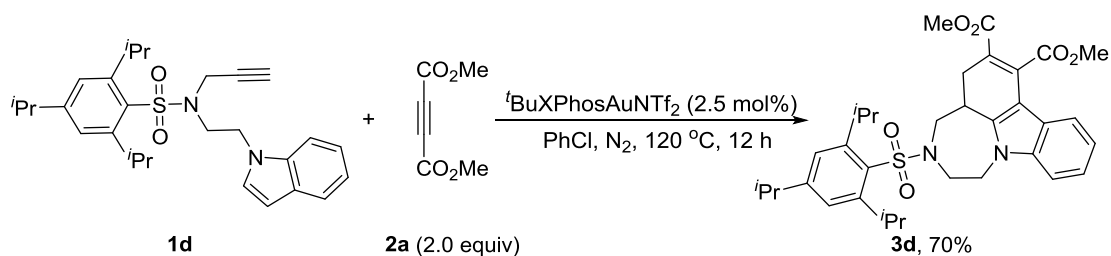

The compound **3d** (yellow solid, 42.5 mg, 70% yield) was obtained following General Procedure B from **1d** (46.1 mg, 0.1 mmol, 1.0 equiv) and **2a** (28.4 mg, 0.2 mmol, 2.0 equiv) using [ $t\text{BuXPhosAuNTf}_2$ ] (2.25 mg, 2.5 mol%) after purification by flash column chromatography using petroleum ether/DCM/THF = 15/4/1 ( $R_f$  = 0.25) as eluent.

$^1\text{H}$  NMR (500 MHz,  $\text{CDCl}_3$ , TMS)  $\delta$  7.41 (d,  $J$  = 8.0 Hz, 1H), 7.27 (d,  $J$  = 9.0 Hz, 1H), 7.24-7.20 (m, 3H), 7.17-7.14 (m, 1H), 4.54 (dd,  $J$  = 15.0, 4.0 Hz, 1H), 4.29 (dd,  $J$  = 14.0, 10.5 Hz, 1H), 4.19 (dd,  $J$  = 15.0, 4.5 Hz, 1H), 4.12-4.07 (m, 2H), 4.01 (s, 3H),



3.93-3.89 (m, 1H), 3.83-3.76 (m, 4H), 3.30 (dd,  $J = 14.5, 10.0$  Hz, 1H), 3.10-3.05 (m, 2H), 2.95-2.90 (m, 1H), 2.46 (dd,  $J = 17.0, 14.5$  Hz, 1H), 1.28-1.26 (m, 18H).

$^{13}\text{C}$  NMR (125 MHz,  $\text{CDCl}_3$ )  $\delta$  169.5, 166.4, 153.8, 151.6, 143.7, 137.98, 137.96, 130.2, 124.3, 123.7, 122.8, 122.0, 118.7, 113.8, 109.9, 108.4, 52.7, 52.3, 52.2, 47.6, 47.1, 35.6, 34.3, 29.5, 28.3, 24.93, 24.89, 23.7.

IR (KBr)  $\nu(\text{cm}^{-1})$ : 1732, 1698, 1600, 1460, 1433, 1255, 1151, 1084, 738  $\text{cm}^{-1}$ .

HRMS (ESI): calcd for  $\text{C}_{34}\text{H}_{43}\text{N}_2\text{O}_6\text{S}$   $[\text{M}+\text{H}]^+$ : 607.28363, found: 607.28406.

MP: 103-105  $^\circ\text{C}$ .

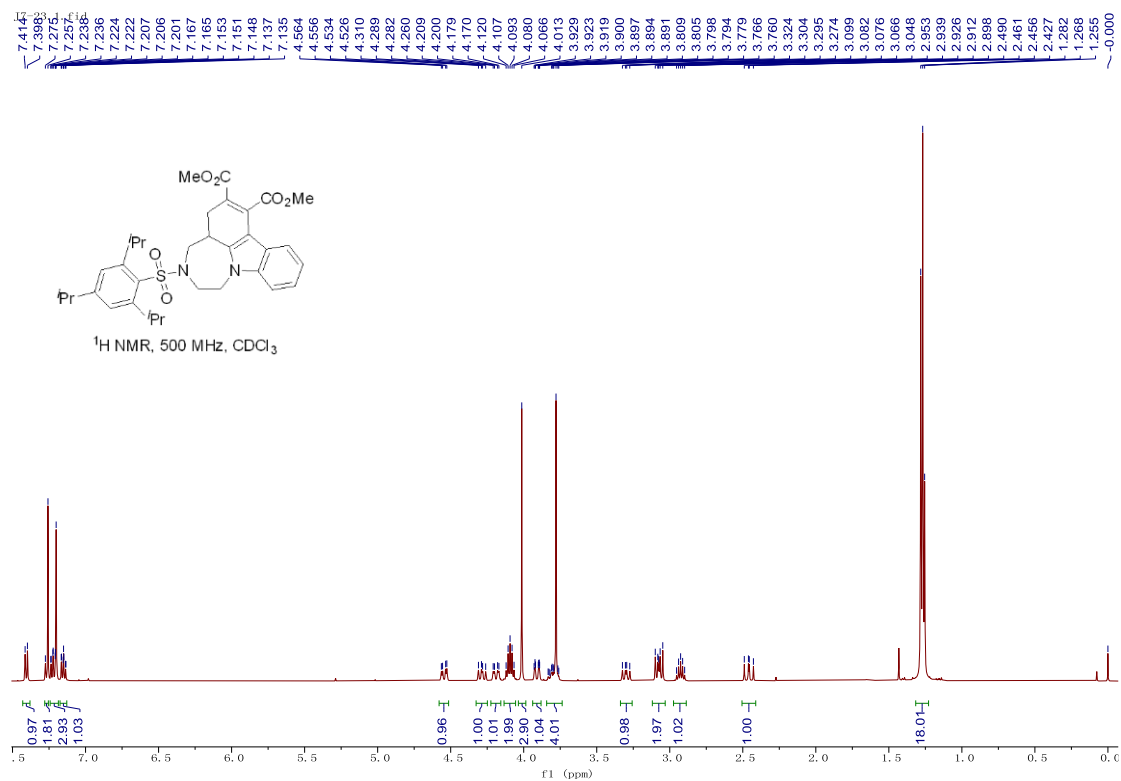

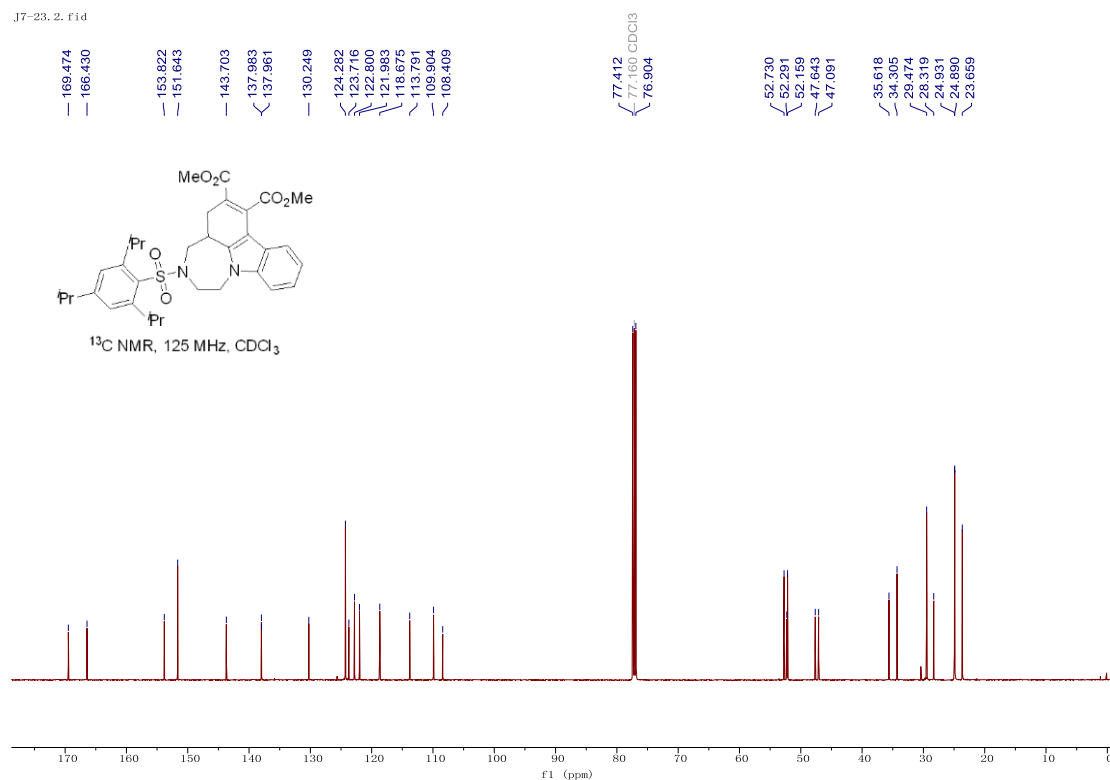

**Dimethyl 3-((4-bromophenyl)sulfonyl)-1,2,3,4,4a,5-hexahydro-[1,4]diazepino  
[6,7,1-*jk*]carbazole-6,7-dicarboxylate (**3e**)**

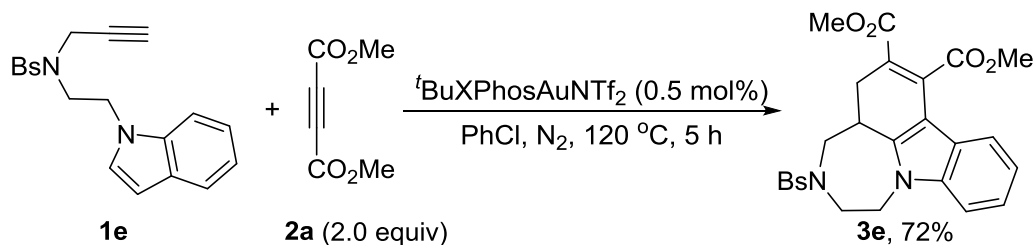

The compound **3e** (yellow solid, 40.2 mg, 72% yield) was obtained following General Procedure B from **1e** (41.7 mg, 0.1 mmol, 1.0 equiv) and **2a** (28.4 mg, 0.2 mmol, 2.0 equiv) using [ $t\text{BuXPhosAuNTf}_2$ ] (0.45 mg, 0.5 mol%) after purification by flash column chromatography using petroleum ether/DCM/THF = 12/4/1 ( $R_f$  = 0.17) as eluent.

**<sup>1</sup>H NMR** (500 MHz, CDCl<sub>3</sub>, TMS)  $\delta$  7.68-7.64 (m, 4H), 7.37 (d,  $J$  = 7.5 Hz, 1H), 7.24-7.19 (m, 2H), 7.15-7.12 (m, 1H), 4.53 (ddd,  $J$  = 14.5, 5.0, 1.5 Hz, 1H), 4.27-4.22 (m, 1H), 4.13-4.04 (m, 2H), 4.01 (s, 3H), 3.79 (s, 3H), 3.62-3.55 (m, 1H), 3.11 (dd,  $J$  = 17.0, 8.5 Hz, 1H), 3.06 (ddd,  $J$  = 14.0, 10.5, 1.5 Hz, 1H), 2.79 (dd,  $J$  = 13.5, 10.5 Hz, 1H), 2.43 (dd,  $J$  = 17.0, 14.0 Hz, 1H).

$^{13}\text{C}$  NMR (125 MHz,  $\text{CDCl}_3$ )  $\delta$  169.4, 166.3, 143.0, 137.9, 137.8, 137.6, 132.9, 128.5, 128.3, 123.6, 122.9, 122.1, 118.7, 113.9, 109.9, 108.5, 53.7, 52.8, 52.2, 49.3, 47.1, 36.0, 28.2.

IR (KBr)  $\nu(\text{cm}^{-1})$ : 1724, 1698, 1461, 1344, 1259, 1240, 1206, 1159, 752, 597  $\text{cm}^{-1}$ .

HRMS (ESI): calcd for  $\text{C}_{25}\text{H}_{23}\text{BrN}_2\text{NaO}_6\text{S}$   $[\text{M}+\text{Na}]^+$ : 581.03524, found: 581.03552.

MP: 202-204  $^\circ\text{C}$ .

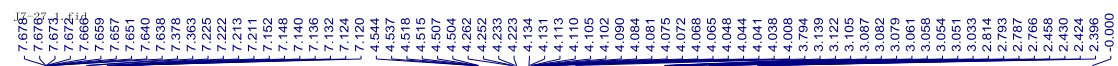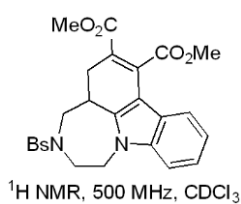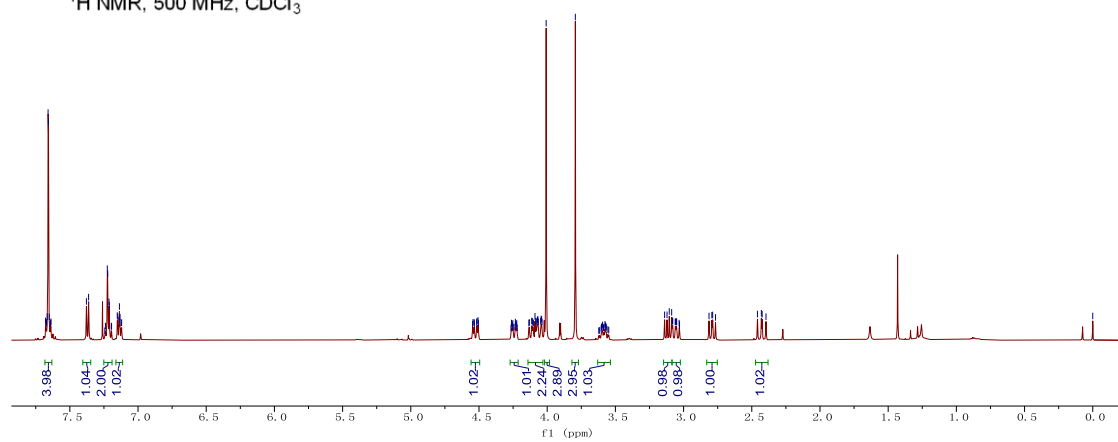

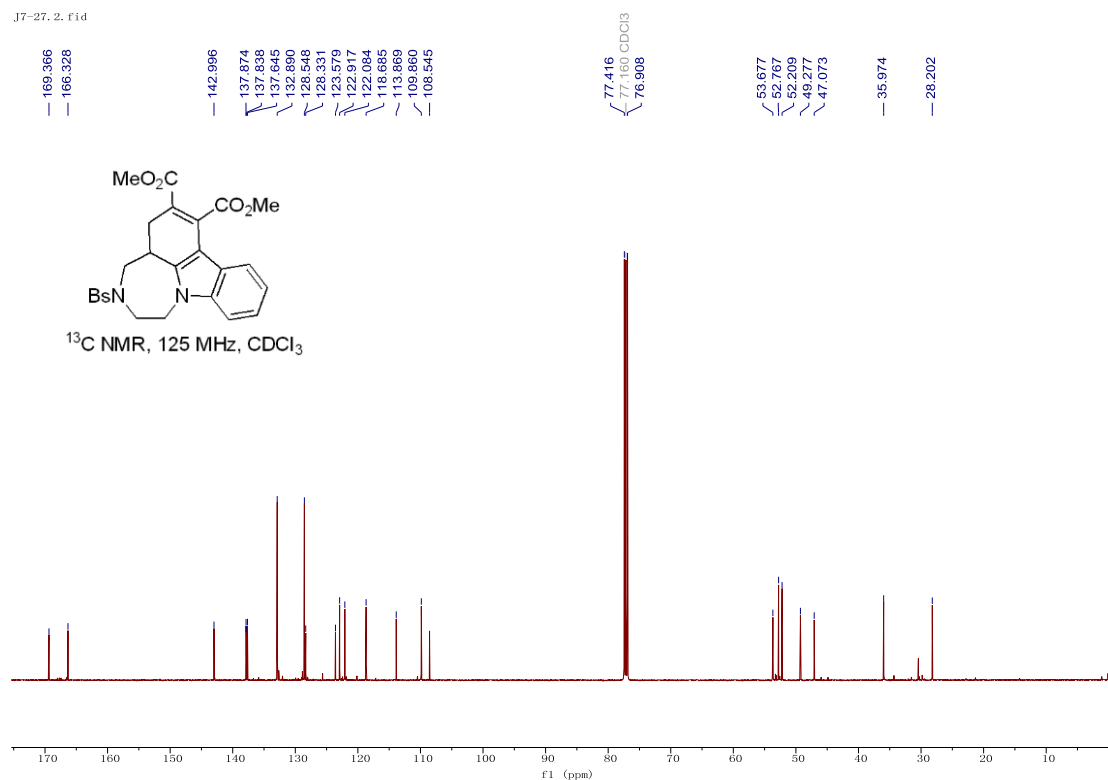

**Dimethyl 3-((4-nitrophenyl)sulfonyl)-1,2,3,4,4a,5-hexahydro-[1,4]diazepino  
[6,7,1-*jk*]carbazole-6,7-dicarboxylate (**3f**)**

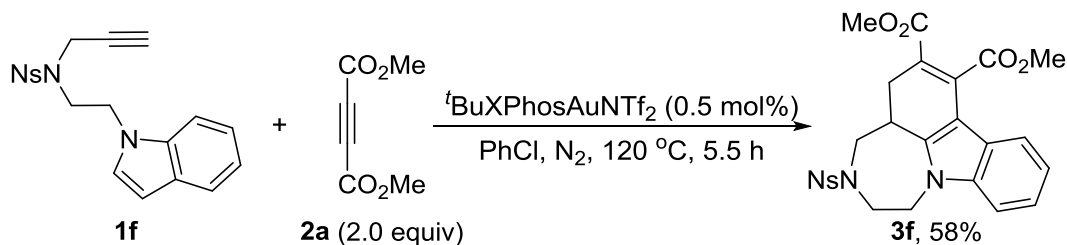

The compound **3f** (yellow solid, 30.5 mg, 58% yield) was obtained following General Procedure B from **1f** (38.3 mg, 0.1 mmol, 1.0 equiv) and **2a** (28.4 mg, 0.2 mmol, 2.0 equiv) using [ $t\text{BuXPhosAuNTf}_2$ ] (0.45 mg, 0.5 mol%) after purification by flash column chromatography using petroleum ether/DCM/THF = 8/4/1 ( $R_f$  = 0.20) as eluent.  $^1\text{H}$  NMR (600 MHz,  $\text{DMSO-}d_6$ , TMS)  $\delta$  8.37-8.32 (m, 2H), 8.15-8.13 (m, 2H), 7.52-7.51 (m, 1H), 7.20-7.18 (m, 2H), 7.11-7.08 (m, 1H), 4.78-4.75 (m, 1H), 4.15-4.10 (m, 2H), 4.06-4.03 (m, 1H), 3.88 (s, 3H), 3.71 (s, 3H), 3.65-3.59 (m, 1H), 3.39-3.36 (m, 1H), 3.15-3.11 (m, 1H), 3.05 (dd,  $J$  = 17.4, 9.0 Hz, 1H), 2.45 (dd,  $J$  = 17.4, 14.4 Hz, 1H).

<sup>13</sup>C NMR (150 MHz, DMSO-*d*<sub>6</sub>) δ 168.5, 165.7, 149.9, 143.9, 143.5, 137.4, 137.2, 128.5, 124.8, 122.7, 122.2, 121.5, 117.5, 113.2, 110.9, 106.9, 79.2, 52.3, 51.9, 48.4, 45.9, 34.8, 27.6.

IR (KBr) ν(cm<sup>-1</sup>): 1733, 1348, 1254, 1238, 1203, 1163, 1026, 1007, 741 cm<sup>-1</sup>.

HRMS (ESI): calc for C<sub>25</sub>H<sub>24</sub>N<sub>3</sub>O<sub>8</sub>S [M+H]<sup>+</sup>: 526.12786, found: 526.12842.

MP: 113-116 °C.

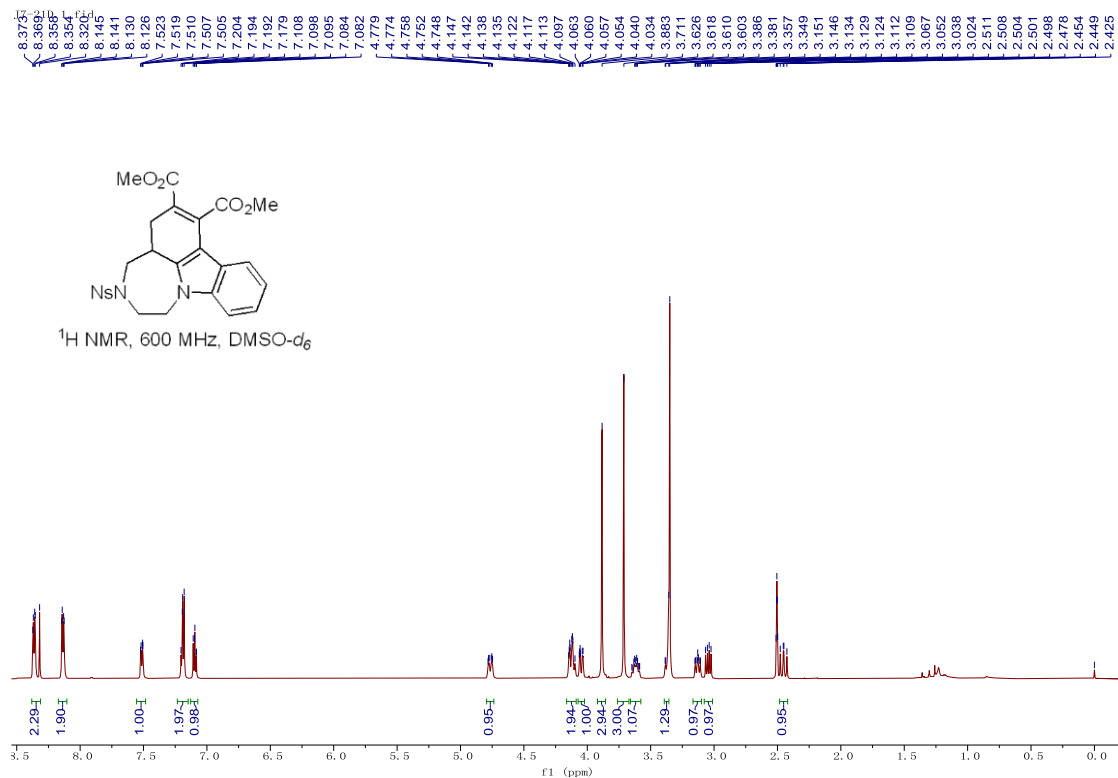

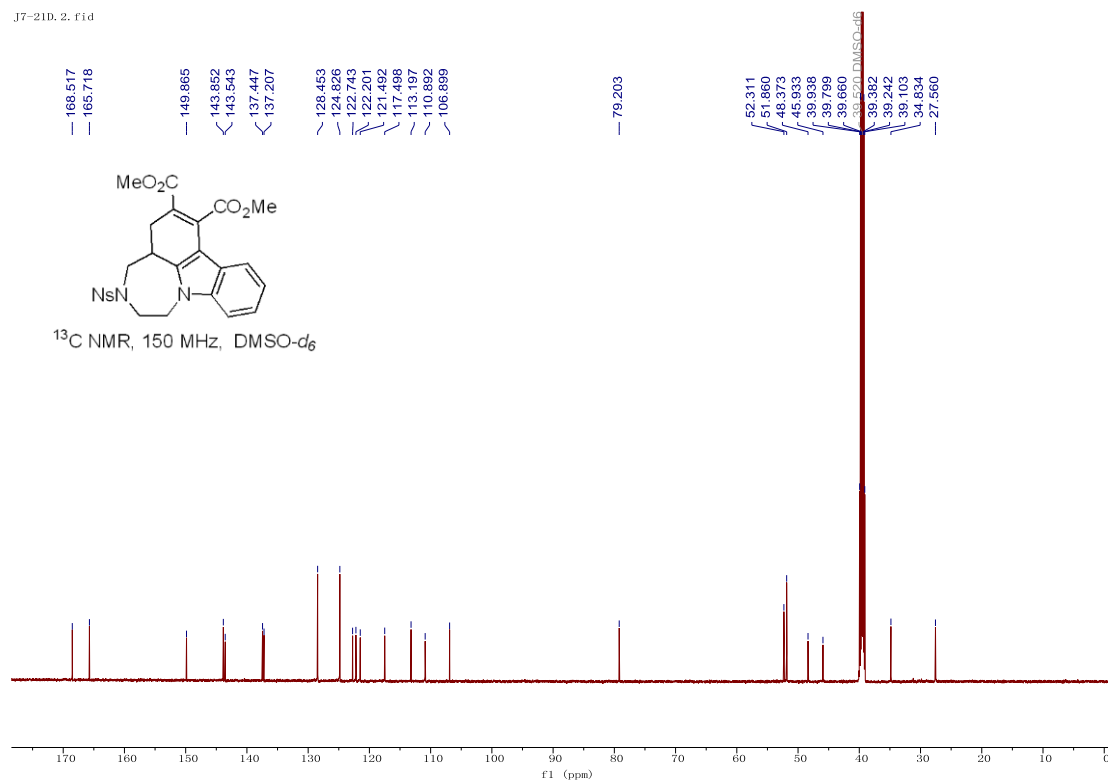

### Dimethyl 8-methyl-3-tosyl-1,2,3,4,4a,5-hexahydro-[1,4]diazepino[6,7,1-*jk*]carbazole-6,7-dicarboxylate (**3g**)

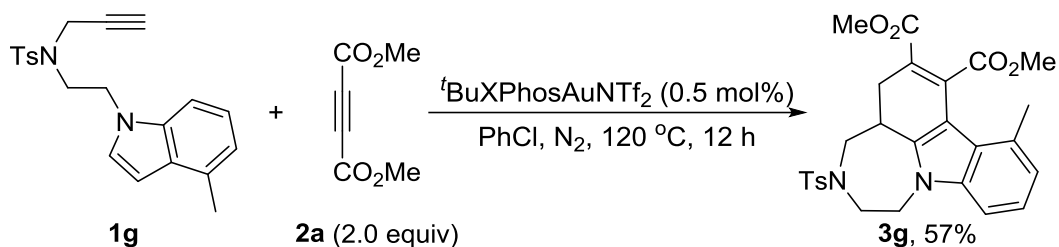

The compound **3g** (yellow solid, 29.0 mg, 57% yield) was obtained following General Procedure B from **1g** (36.7 mg, 0.1 mmol, 1.0 equiv) and **2a** (28.4 mg, 0.2 mmol, 2.0 equiv) using  $[t\text{BuXPhosAuNTf}_2]$  (0.45 mg, 0.5 mol%) after purification by flash column chromatography using petroleum ether/DCM/THF = 15/4/1 ( $R_f = 0.15$ ) as eluent.

$^1\text{H}$  NMR (500 MHz,  $\text{CDCl}_3$ , TMS)  $\delta$  7.67 (dt,  $J = 8.5, 2.0$  Hz, 2H), 7.32 (d,  $J = 8.0$  Hz, 2H), 7.11-7.06 (m, 2H), 6.93-6.91 (m, 1H), 4.48-4.43 (m, 1H), 4.18-4.05 (m, 3H), 3.88 (s, 3H), 3.80 (s, 3H), 3.41-3.34 (m, 1H), 3.12-3.07 (m, 1H), 2.94 (dd,  $J = 15.5, 7.5$  Hz, 1H), 2.77 (dd,  $J = 13.5, 10.0$  Hz, 1H), 2.50 (dd,  $J = 16.0, 14.5$  Hz, 1H), 2.43 (s, 3H), 2.41 (s, 3H).

$^{13}\text{C}$  NMR (125 MHz,  $\text{CDCl}_3$ )  $\delta$  169.9, 167.3, 145.4, 144.2, 138.3, 138.2, 135.3, 131.0, 130.2, 127.1, 124.4, 123.7, 122.8, 116.8, 110.1, 107.4, 52.7, 52.6, 52.2, 48.8, 46.2, 35.5, 29.5, 21.6, 21.2.

IR (KBr)  $\nu(\text{cm}^{-1})$ : 1734, 1695, 1593, 1472, 1339, 1293, 1196, 1160, 733  $\text{cm}^{-1}$ .

HRMS (ESI): calcd for  $\text{C}_{27}\text{H}_{29}\text{N}_2\text{O}_6\text{S}$   $[\text{M}+\text{H}]^+$ : 509.17408, found: 509.17462.

MP: 186-188  $^\circ\text{C}$ .

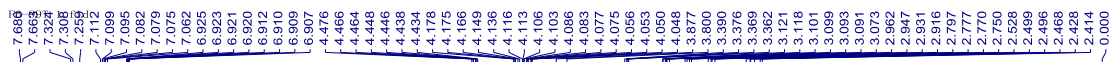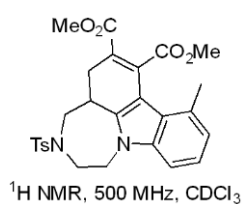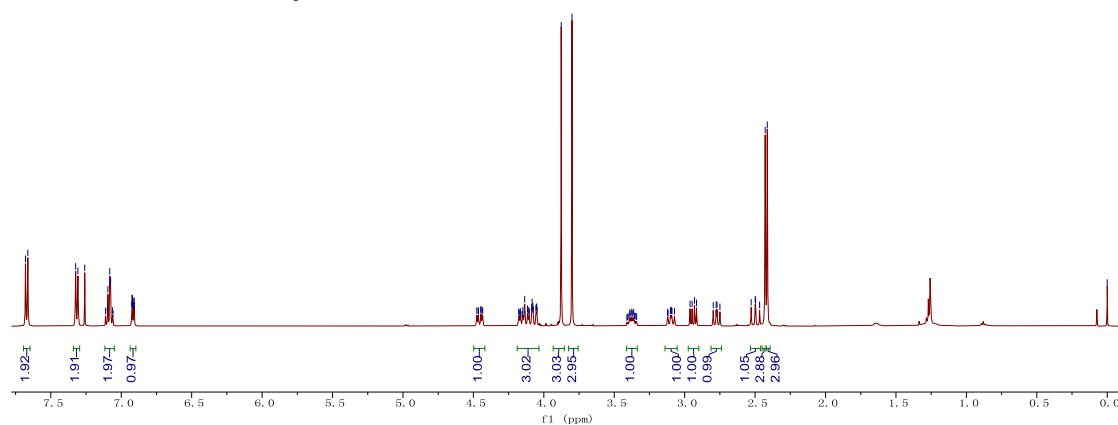

F6-99T.2.fid

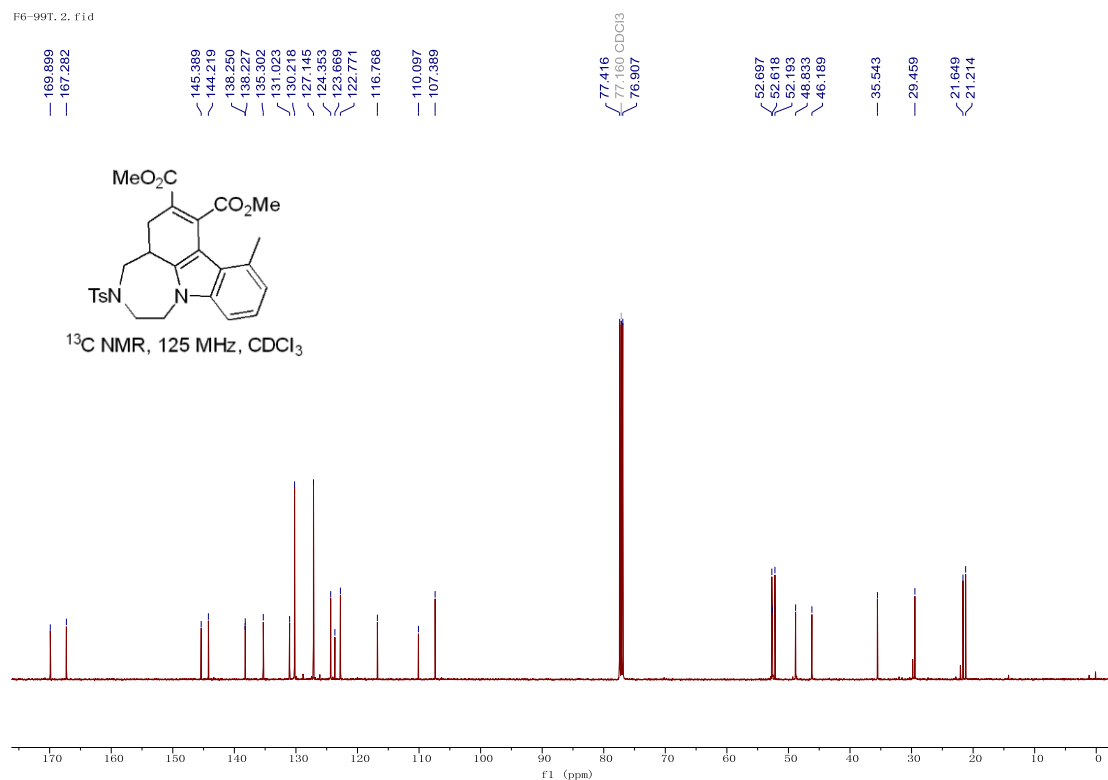

### Dimethyl 9-methyl-3-tosyl-1,2,3,4,4a,5-hexahydro-[1,4]diazepino[6,7,1-*jk*]carbazole-6,7-dicarboxylate (**3h**)

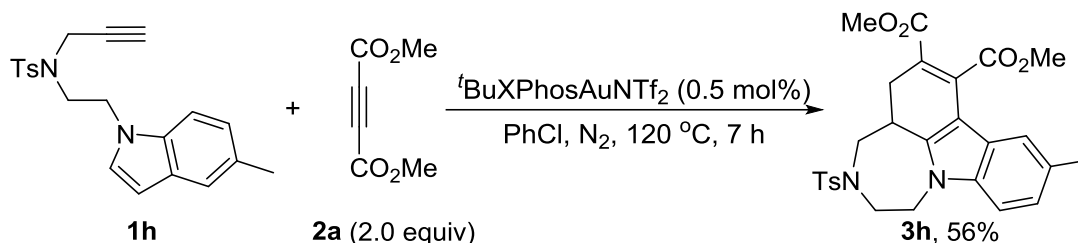

The compound **3h** (yellow solid, 28.7 mg, 56% yield) was obtained following General Procedure B from **1h** (36.7 mg, 0.1 mmol, 1.0 equiv) and **2a** (28.4 mg, 0.2 mmol, 2.0 equiv) using [ $t\text{BuXPhosAuNTf}_2$ ] (0.45 mg, 0.5 mol%) after purification by flash column chromatography using petroleum ether/DCM/THF = 8/4/1 ( $R_f$  = 0.27) as eluent. <sup>1</sup>H NMR (600 MHz, CDCl<sub>3</sub>, TMS)  $\delta$  7.69-7.67 (m, 2H), 7.33-7.32 (m, 2H), 7.13-7.11 (m, 2H), 7.03 (dd,  $J$  = 8.4, 1.8 Hz, 1H), 4.48 (ddd,  $J$  = 15.0, 5.4, 1.2 Hz, 1H), 4.28-4.24 (m, 1H), 4.11-4.07 (m, 2H), 4.01 (s, 3H), 3.90 (d,  $J$  = 3.0 Hz, 1H), 3.79 (s, 3H), 3.58-3.52 (m, 1H), 3.10 (dd,  $J$  = 16.8, 9.0 Hz, 1H), 3.02 (ddd,  $J$  = 13.8, 10.2, 1.2 Hz, 1H), 2.75 (dd,  $J$  = 13.8, 10.8 Hz, 1H), 2.42 (s, 3H), 2.39 (s, 3H).



$^{13}\text{C}$  NMR (150 MHz,  $\text{CDCl}_3$ )  $\delta$  169.5, 166.5, 144.2, 143.3, 138.1, 136.3, 135.5, 131.5, 130.2, 127.1, 124.3, 123.8, 118.4, 113.4, 109.5, 108.0, 53.8, 52.7, 52.2, 49.3, 47.0, 35.8, 28.2, 21.74, 21.66.

IR (KBr)  $\nu(\text{cm}^{-1})$ : 1702, 1426, 1329, 1270, 1238, 1219, 1108, 740, 548  $\text{cm}^{-1}$ .

HRMS (ESI): calcd for  $\text{C}_{27}\text{H}_{29}\text{N}_2\text{O}_6\text{S}$   $[\text{M}+\text{H}]^+$ : 509.17408, found: 509.17465.

MP: 169-172  $^\circ\text{C}$ .

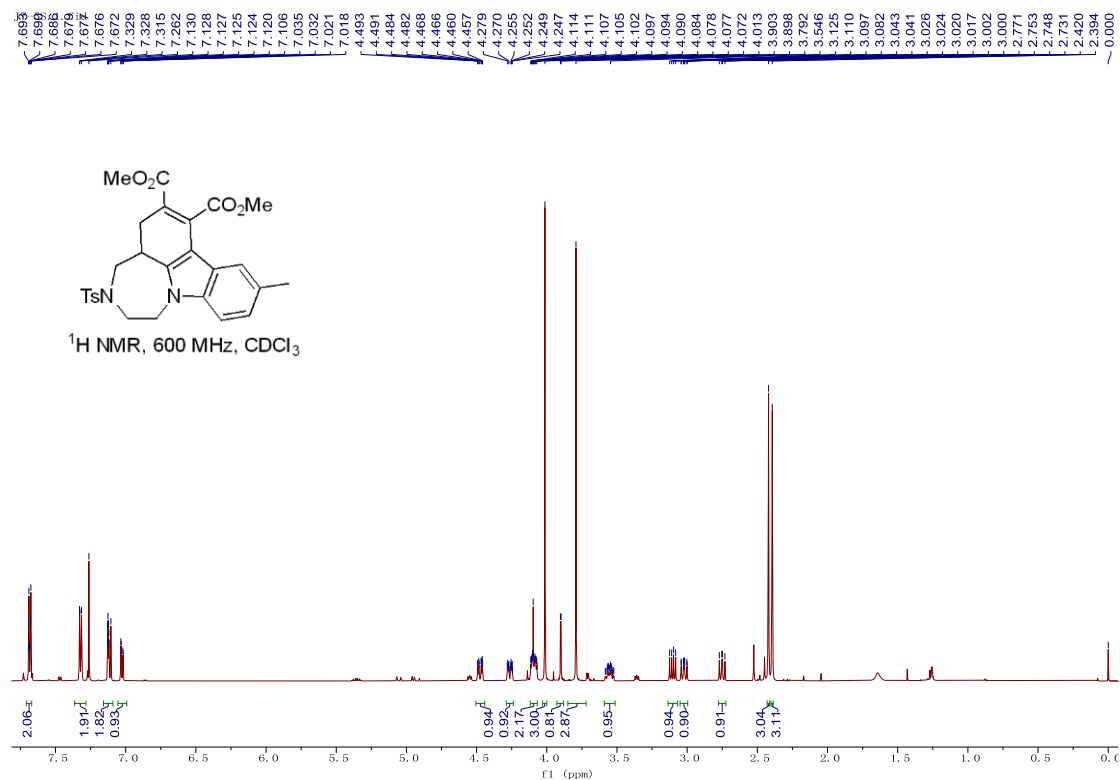

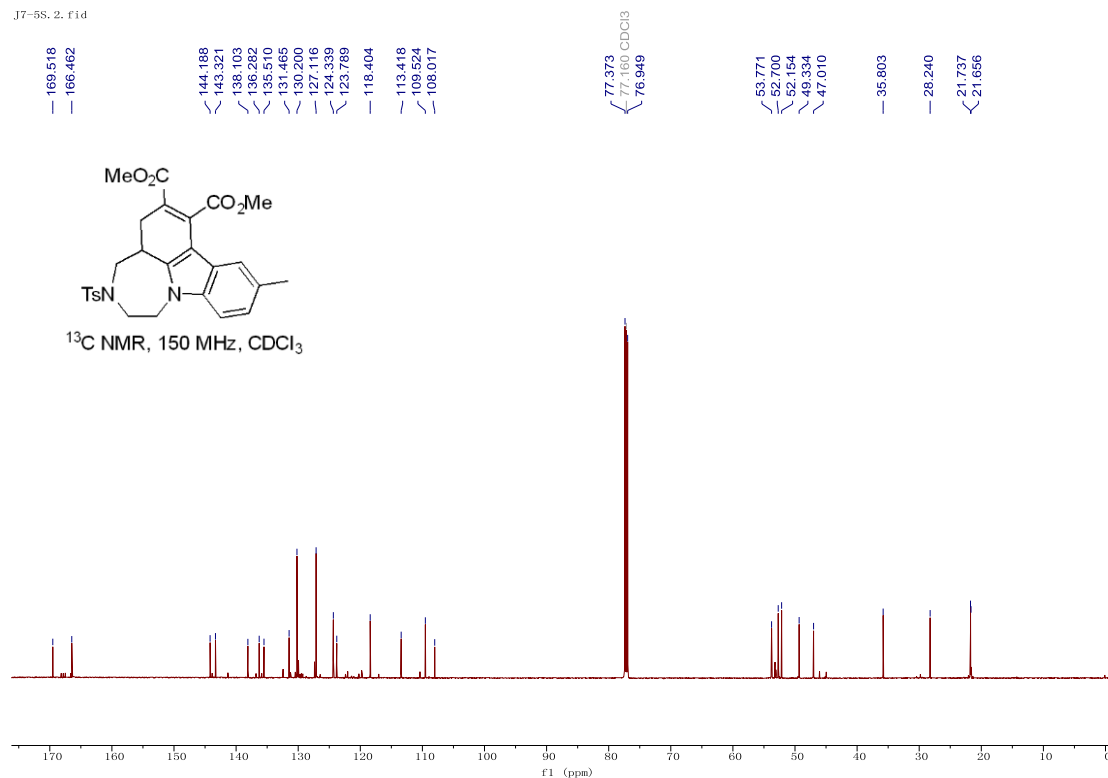

### Dimethyl 10-methyl-3-tosyl-1,2,3,4,4a,5-hexahydro-[1,4]diazepino[6,7,1-*jk*]carbazole-6,7-dicarboxylate (**3i**)

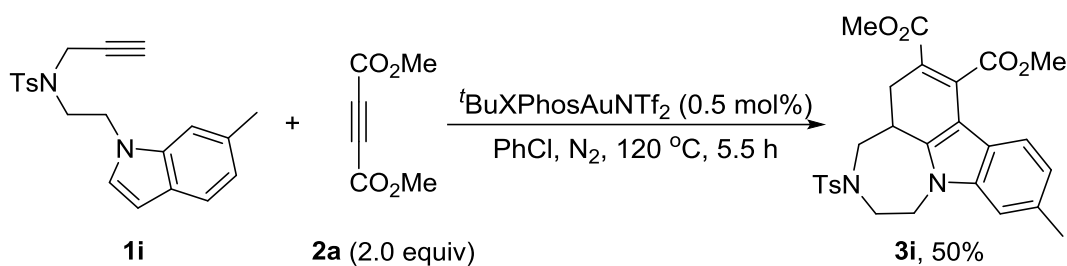

The compound **3i** (yellow solid, 25.4 mg, 50% yield) was obtained following General Procedure B from **1i** (36.6 mg, 0.1 mmol, 1.0 equiv) and **2a** (28.4 mg, 0.2 mmol, 2.0 equiv) using [tBuXPhosAuNTf<sub>2</sub>] (0.45 mg, 0.5 mol%) after purification by flash column chromatography using petroleum ether/DCM/THF = 12/4/1 (*R<sub>f</sub>* = 0.27) as eluent. <sup>1</sup>H NMR (500 MHz, CDCl<sub>3</sub>, TMS) δ 7.69 (dt, *J* = 8.5, 2.0 Hz, 2H), 7.33 (d, *J* = 8.0 Hz, 2H), 7.25 (d, *J* = 8.0 Hz, 1H), 7.03 (s, 1H), 6.97 (dd, *J* = 8.5, 1.5 Hz, 1H), 4.49 (ddd, *J* = 14.5, 5.0, 1.0 Hz, 1H), 4.29-4.25 (m, 1H), 4.11-4.06 (m, 2H), 4.00 (s, 3H), 3.79 (s, 3H), 3.59-3.52 (m, 1H), 3.10 (dd, *J* = 17.0, 9.0 Hz, 1H), 3.02 (ddd, *J* = 14.5, 10.5, 1.0 Hz, 1H), 2.75 (dd, *J* = 13.5, 10.5 Hz, 1H), 2.46-2.39 (m, 7H).

$^{13}\text{C}$  NMR (125 MHz,  $\text{CDCl}_3$ )  $\delta$  169.5, 166.5, 144.2, 142.8, 138.3, 138.0, 135.6, 132.9, 130.2, 127.1, 123.7, 121.4, 118.3, 113.6, 109.9, 108.4, 53.8, 52.7, 52.2, 49.4, 46.8, 35.8, 28.3, 21.9, 21.7.

IR (KBr)  $\nu(\text{cm}^{-1})$ : 1733, 1435, 1341, 1268, 1236, 1090, 813, 654, 546  $\text{cm}^{-1}$ .

HRMS (ESI): calcd for  $\text{C}_{27}\text{H}_{29}\text{N}_2\text{O}_6\text{S}$   $[\text{M}+\text{H}]^+$ : 509.17408, found: 509.17496.

MP: 204-206  $^\circ\text{C}$ .

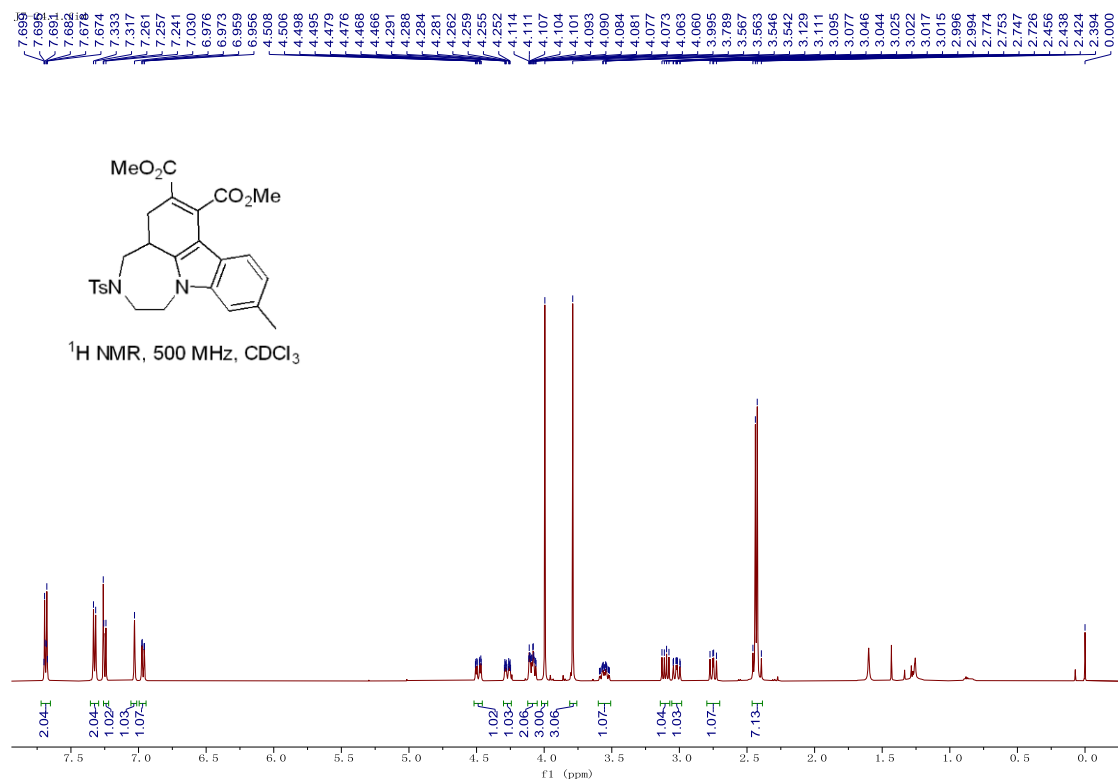

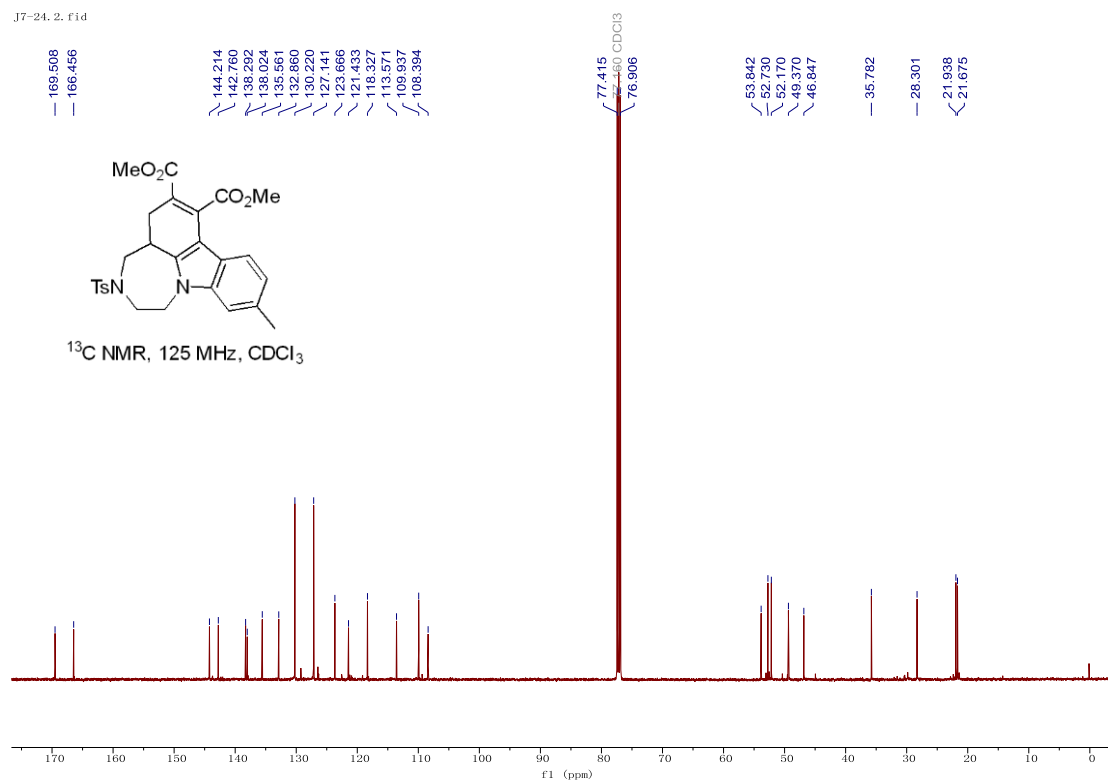

### Dimethyl 11-methyl-3-tosyl-1,2,3,4,4a,5-hexahydro-[1,4]diazepino[6,7,1-*jk*]carbazole-6,7-dicarboxylate (**3j**)

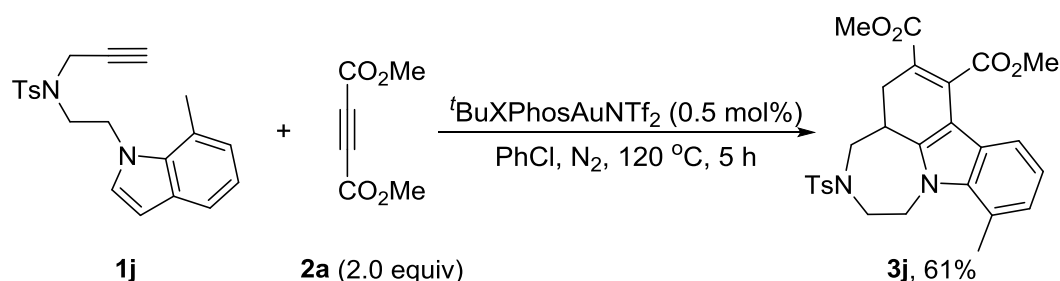

The compound **3j** (yellow solid, 30.8 mg, 61% yield) was obtained following General Procedure B from **1j** (36.7 mg, 0.1 mmol, 1.0 equiv) and **2a** (28.4 mg, 0.2 mmol, 2.0 equiv) using [*t*BuXPhosAuNTf<sub>2</sub>] (0.45 mg, 0.5 mol%) after purification by flash column chromatography using petroleum ether/DCM/THF = 8/4/1 (*R<sub>f</sub>* = 0.19) as eluent. <sup>1</sup>H NMR (500 MHz, CDCl<sub>3</sub>, TMS) δ 7.64 (dt, *J* = 8.0, 1.5 Hz, 2H), 7.30 (d, *J* = 8.5 Hz, 2H), 7.21 (d, *J* = 8.0 Hz, 1H), 7.00 (t, *J* = 7.0 Hz, 1H), 6.91 (d, *J* = 7.5 Hz, 1H), 5.05 (dd, *J* = 15.0, 5.5 Hz, 1H), 4.24 (dd, *J* = 14.5, 9.0 Hz, 1H), 4.16 (dd, *J* = 14.5, 6.5 Hz, 1H), 4.01-3.97 (m, 4H), 3.79 (s, 3H), 3.51-3.45 (m, 1H), 3.07 (dd, *J* = 17.5, 9.5 Hz, 1H), 2.90-2.85 (m, 1H), 2.73 (dd, *J* = 13.5, 10.5 Hz, 1H), 2.65-2.59 (m, 4H), 2.40 (s, 3H).

$^{13}\text{C}$  NMR (125 MHz,  $\text{CDCl}_3$ )  $\delta$  169.5, 166.4, 144.4, 144.2, 137.6, 136.7, 135.0, 130.2, 127.1, 126.7, 124.6, 122.1, 121.2, 116.8, 113.7, 108.5, 53.2, 52.7, 52.2, 48.9, 48.0, 34.4, 28.6, 21.6, 21.2.

IR (KBr)  $\nu$  ( $\text{cm}^{-1}$ ): 1734, 1700, 1296, 1260, 1241, 1206, 1160, 1099, 732  $\text{cm}^{-1}$ .

HRMS (ESI): calcd for  $\text{C}_{27}\text{H}_{29}\text{N}_2\text{O}_6\text{S}$   $[\text{M}+\text{H}]^+$ : 509.17408, found: 509.17474.

MP: 202-204  $^\circ\text{C}$ .

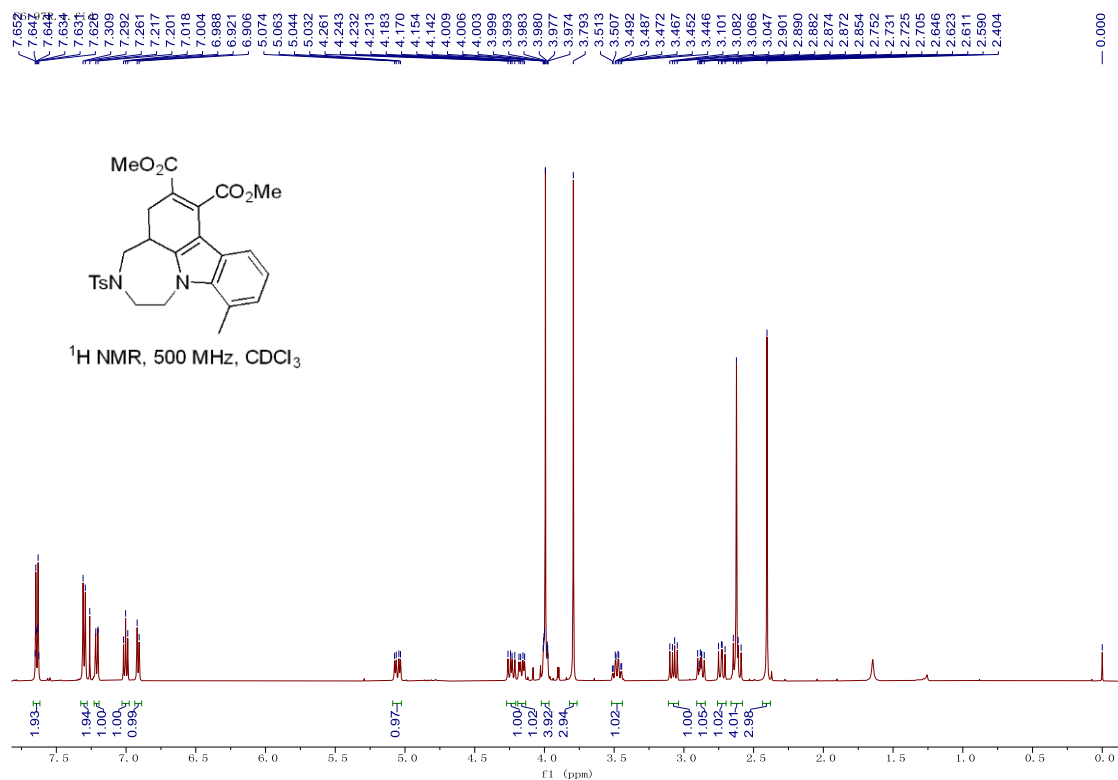

F6-97R. 2. F1d

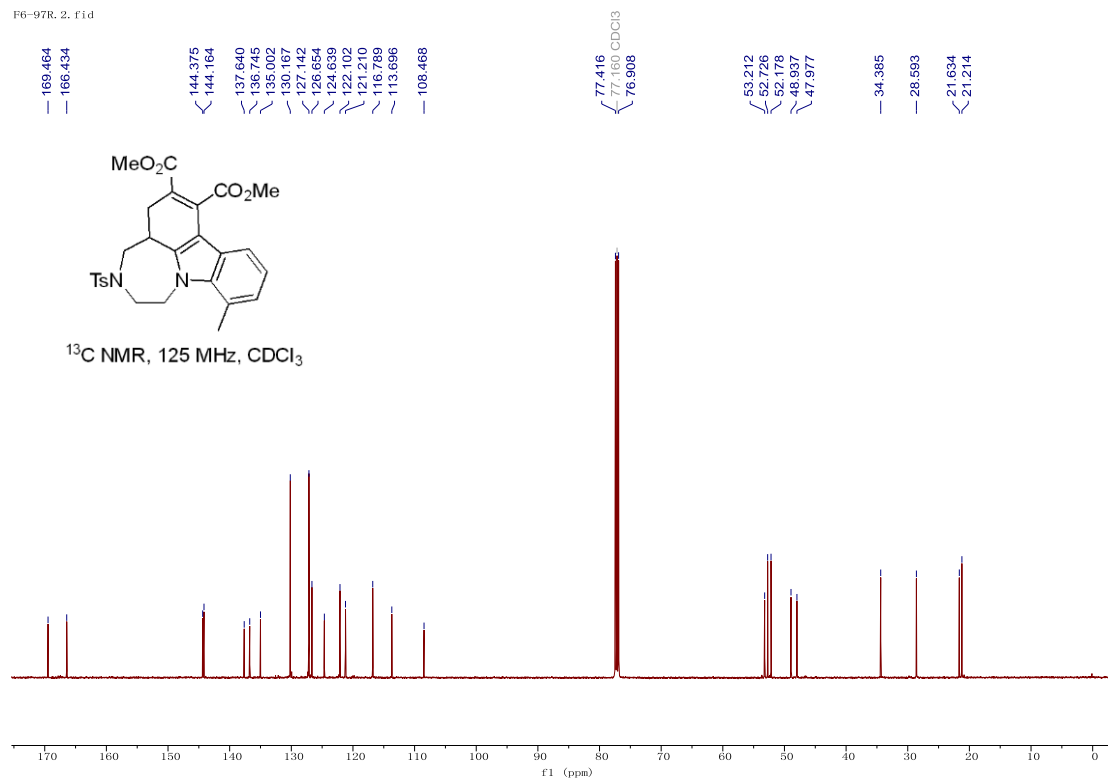

### Dimethyl 9-methoxy-3-tosyl-1,2,3,4,4a,5-hexahydro-[1,4]diazepino[6,7,1-*jk*]carbazole-6,7-dicarboxylate (**3k**)

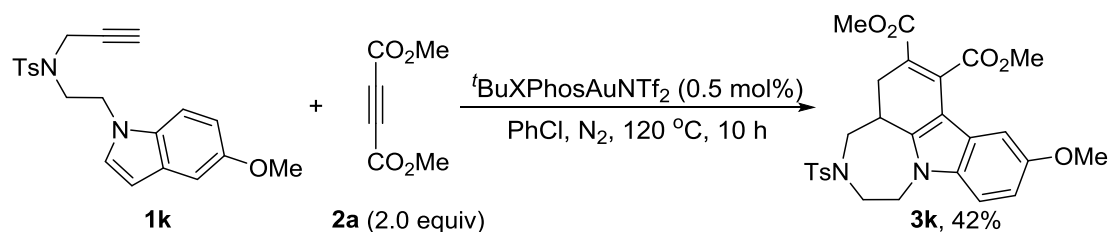

The compound **3k** (yellow solid, 22.0 mg, 42% yield) was obtained following General Procedure B from **1k** (38.2 mg, 0.1 mmol, 1.0 equiv) and **2a** (28.4 mg, 0.2 mmol, 2.0 equiv) using [ $t\text{BuXPhosAuNTf}_2$ ] (0.45 mg, 0.5 mol%) after purification by flash column chromatography using petroleum ether/DCM/THF = 12/4/1 ( $R_f$  = 0.17) as eluent.

<sup>1</sup>H NMR (500 MHz, CDCl<sub>3</sub>, TMS)  $\delta$  7.69 (d,  $J$  = 8.5 Hz, 2H), 7.33 (d,  $J$  = 8.0 Hz, 2H), 7.12 (dd,  $J$  = 8.5, 1.0 Hz, 1H), 6.85-6.83 (m, 2H), 4.45 (ddd,  $J$  = 15.0, 5.5, 1.5 Hz, 1H), 4.29-4.24 (m, 1H), 4.11-4.08 (m, 2H), 4.01 (s, 3H), 3.81 (s, 3H), 3.79 (s, 3H), 3.59-3.51 (m, 1H), 3.10 (dd,  $J$  = 17.0, 8.5 Hz, 1H), 3.04 (ddd,  $J$  = 14.0, 10.5, 1.0 Hz, 1H), 2.76 (dd,  $J$  = 13.5, 10.5 Hz, 1H), 2.44-2.40 (m, 4H).

$^{13}\text{C}$  NMR (125 MHz,  $\text{CDCl}_3$ )  $\delta$  169.5, 166.4, 155.6, 144.2, 143.7, 138.0, 135.5, 133.0, 130.2, 127.1, 124.2, 113.4, 112.5, 110.6, 108.1, 100.8, 55.8, 53.7, 52.7, 52.2, 49.3, 47.2, 35.9, 28.2, 21.7.

IR (KBr)  $\nu$  ( $\text{cm}^{-1}$ ): 1736, 1701, 1483, 1432, 1325, 1258, 1196, 1156, 740  $\text{cm}^{-1}$ .

HRMS (ESI): calcd  $\text{C}_{27}\text{H}_{29}\text{N}_2\text{O}_7\text{S}$   $[\text{M}+\text{H}]^+$ : 525.16900, found: 525.16943.

MP: 166-168  $^\circ\text{C}$ .

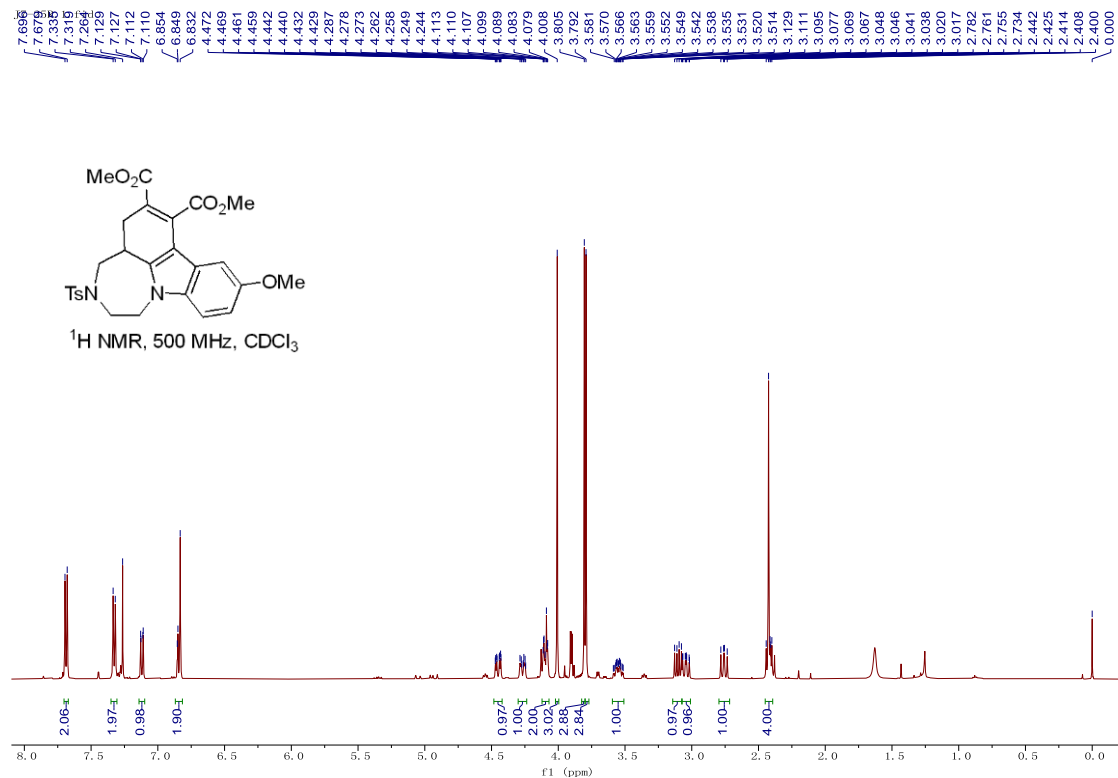

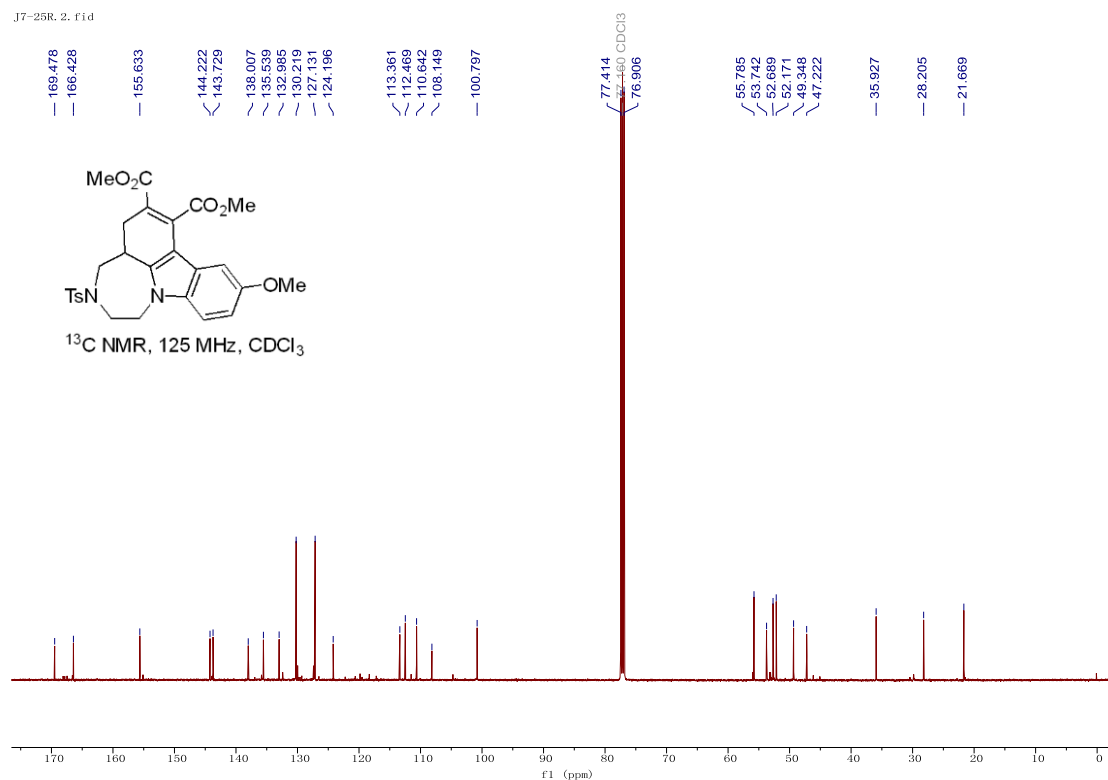

**Dimethyl 8-fluoro-3-tosyl-1,2,3,4,4a,5-hexahydro-[1,4]diazepino[6,7,1-*jk*]carbazole-6,7-dicarboxylate (**3l**)**

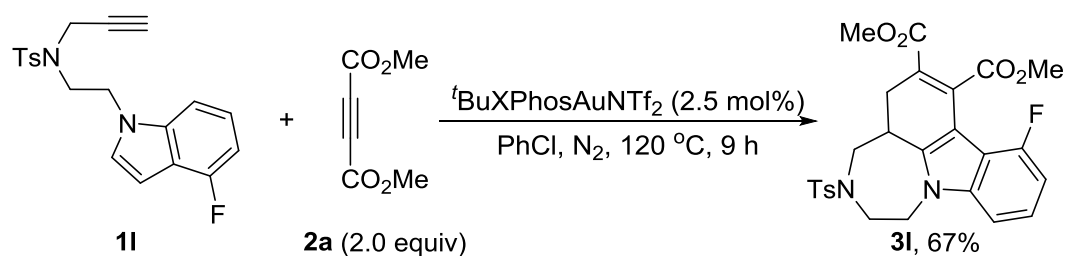

The compound **3l** (white solid, 34.3 mg, 67% yield) was obtained following General Procedure B from **1l** (37.0 mg, 0.1 mmol, 1.0 equiv) and **2a** (28.4 mg, 0.2 mmol, 2.0 equiv) using [tBuXPhosAuNTf<sub>2</sub>] (2.25 mg, 2.5 mol%) after purification by flash column chromatography using petroleum ether/DCM/THF = 8/4/1 (R<sub>f</sub> = 0.28) as eluent.

<sup>1</sup>H NMR (500 MHz, CDCl<sub>3</sub>, TMS) δ 7.68 (dt, *J* = 8.5, 2.0 Hz, 2H), 7.33 (d, *J* = 8.0 Hz, 2H), 7.12 (td, *J* = 8.5, 5.0 Hz, 1H), 7.02 (d, *J* = 8.5 Hz, 1H), 6.81 (dd, *J* = 11.0, 7.5 Hz, 1H), 4.50 (ddd, *J* = 15.0, 5.5, 1.5 Hz, 1H), 4.25-4.21 (m, 1H), 4.17-4.07 (m, 2H), 3.94 (s, 3H), 3.80 (s, 3H), 3.54-3.47 (m, 1H), 3.10-3.04 (m, 2H), 2.80 (dd, *J* = 13.5, 10.5 Hz, 1H), 2.50 (dd, *J* = 16.5, 13.5 Hz, 1H), 2.42 (s, 3H).



$^{13}\text{C}$  NMR (125 MHz,  $\text{CDCl}_3$ )  $\delta$  169.0, 166.5, 156.0 (d,  $J = 246.6$  Hz), 144.3, 143.9, 140.3 (d,  $J = 11.0$  Hz), 138.1, 135.3, 130.3, 127.1, 123.4 (d,  $J = 8.3$  Hz), 115.4, 112.6 (d,  $J = 20.4$  Hz), 107.7 (d,  $J = 21.5$  Hz), 107.6, 105.9 (d,  $J = 3.4$  Hz), 53.3, 52.7 (d,  $J = 3.8$  Hz), 52.3, 49.0, 47.1, 35.3, 28.7, 21.7.

$^{19}\text{F}$  NMR (470 MHz,  $\text{CDCl}_3$ )  $\delta$  (-116.17) - (-116.21) (m).

IR (KBr)  $\nu(\text{cm}^{-1})$ : 1737, 1699, 1433, 1329, 1314, 1296, 1236, 1152, 735  $\text{cm}^{-1}$ .

HRMS (ESI): calcd for  $\text{C}_{26}\text{H}_{26}\text{FN}_2\text{O}_6\text{S}$   $[\text{M}+\text{H}]^+$ : 513.14901, found: 513.14954.

MP: 86-89  $^\circ\text{C}$ .

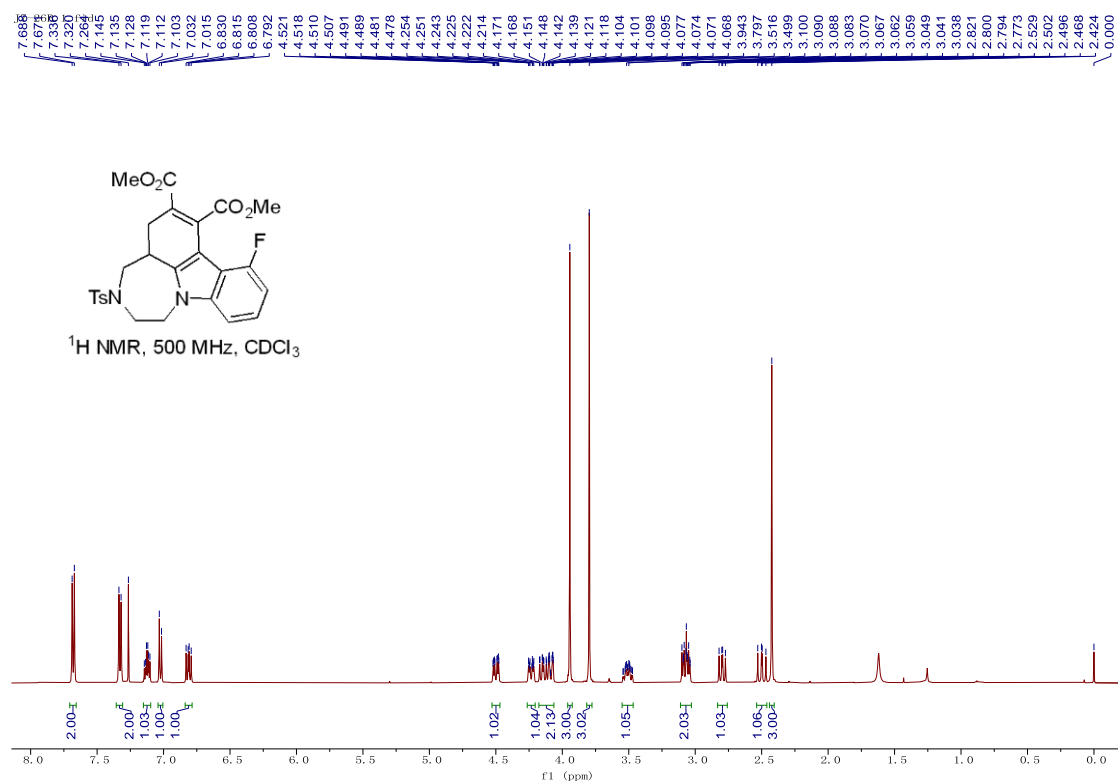

J7-26B. 2. f1d

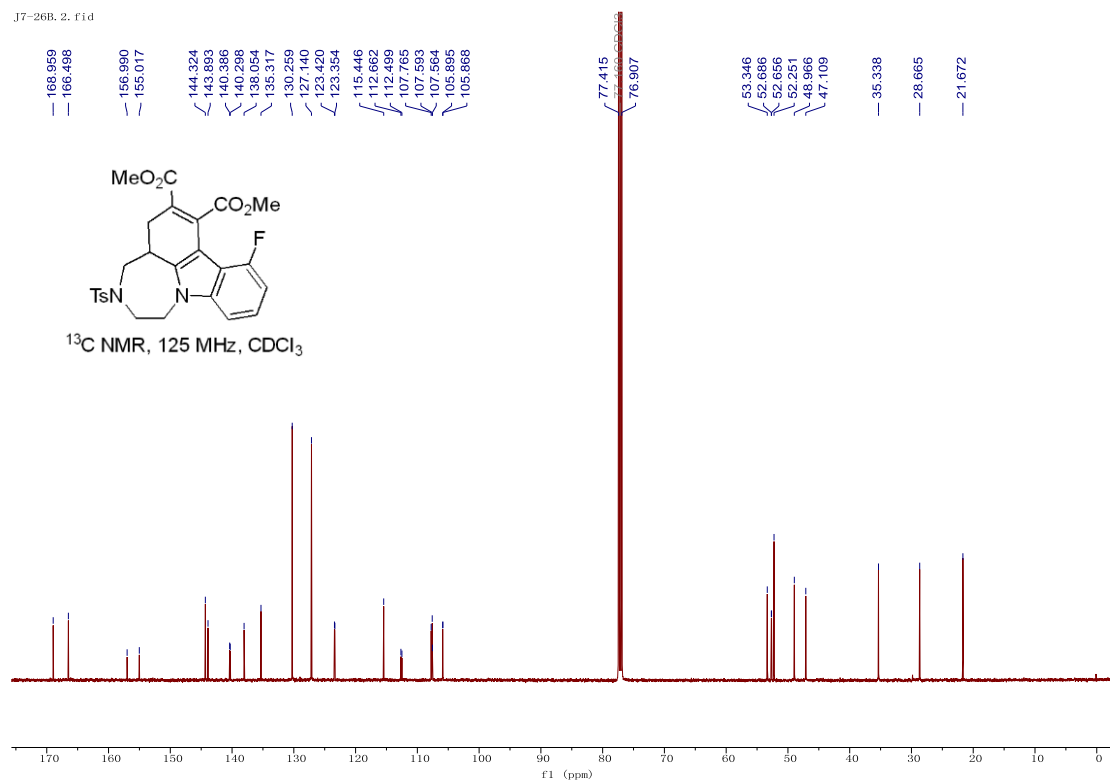

J7-26B. 3. f1d

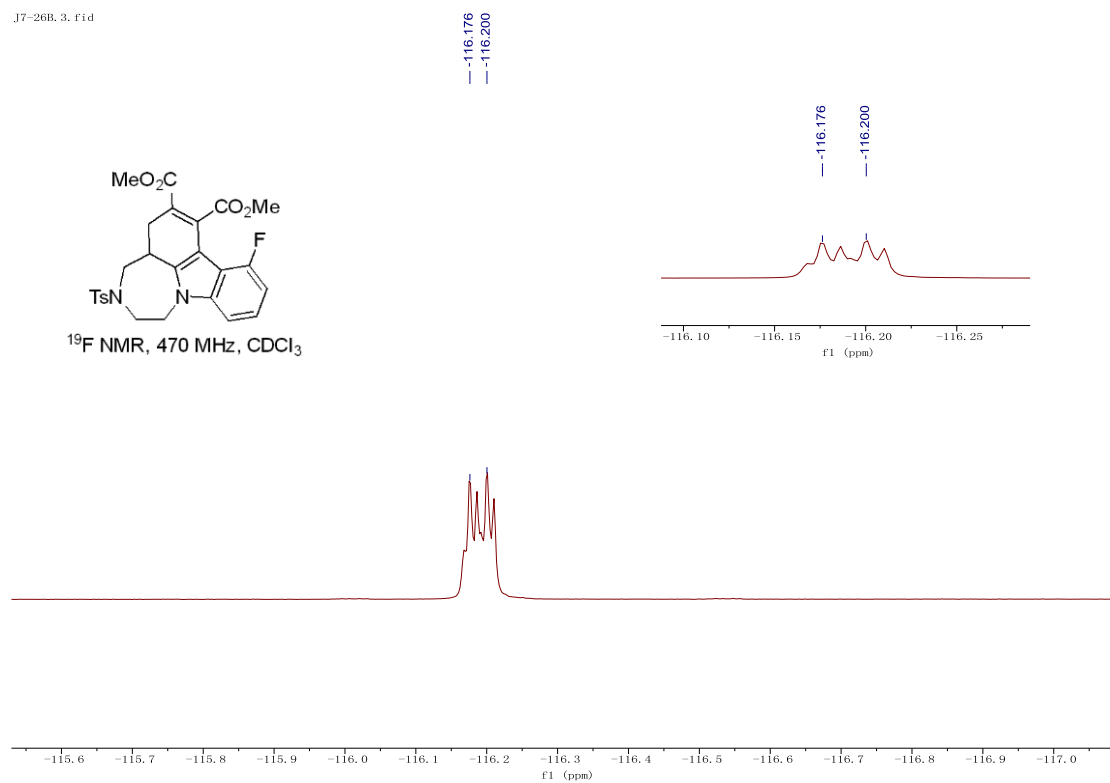

**Dimethyl 8-chloro-3-tosyl-1,2,3,4,4a,5-hexahydro-[1,4]diazepino[6,7,1-*jk*]carbazole-6,7-dicarboxylate (**3m**)**

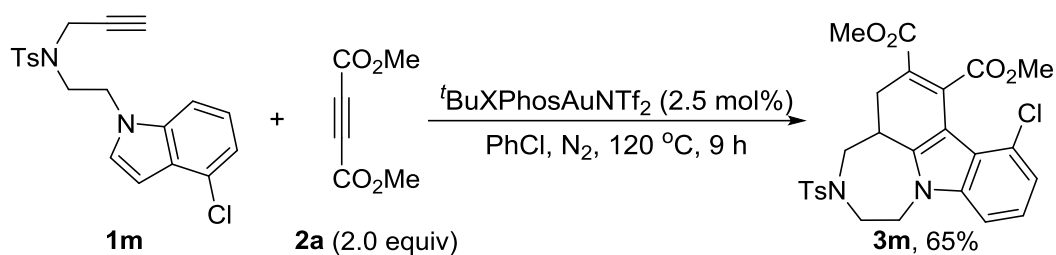

The compound **3m** (yellow solid, 34.4 mg, 65% yield) was obtained following General Procedure B from **1m** (38.7 mg, 0.1 mmol, 1.0 equiv) and **2a** (28.4 mg, 0.2 mmol, 2.0 equiv) using [<sup>t</sup>BuXPhosAuNTf<sub>2</sub>] (2.25 mg, 2.5 mol%) after purification by flash column chromatography using petroleum ether/DCM/THF = 8/4/1 (*R<sub>f</sub>* = 0.40) as eluent.

<sup>1</sup>H NMR (500 MHz, CDCl<sub>3</sub>, TMS) δ 7.66 (d, *J* = 8.0 Hz, 2H), 7.32 (d, *J* = 8.0 Hz, 2H), 7.15-7.07 (m, 3H), 4.46 (dd, *J* = 15.0, 5.5 Hz, 1H), 4.19-4.10 (m, 2H), 4.06 (dt, *J* = 14.0, 2.0 Hz, 1H), 3.86 (s, 3H), 3.80 (s, 3H), 3.42-3.36 (m, 1H), 3.11 (dd, *J* = 15.0, 10.5 Hz, 1H), 2.90 (dd, *J* = 16.0, 7.0 Hz, 1H), 2.78 (dd, *J* = 13.5, 10.5 Hz, 1H), 2.50 (t, *J* = 15.0 Hz, 1H), 2.42 (s, 3H).

<sup>13</sup>C NMR (125 MHz, CDCl<sub>3</sub>) δ 168.8, 167.4, 146.0, 144.3, 139.1, 136.4, 135.2, 130.2, 127.1, 125.9, 123.3, 123.1, 122.1, 118.8, 109.2, 108.4, 52.7, 52.5, 52.3, 48.8, 46.7, 35.7, 29.8, 21.6.

IR (KBr) ν (cm<sup>-1</sup>): 1732, 1710, 1433, 1327, 1292, 1252, 1207, 1161, 1094, 740 cm<sup>-1</sup>.

HRMS (ESI): calcd for C<sub>26</sub>H<sub>26</sub>ClN<sub>2</sub>O<sub>6</sub>S [M+H]<sup>+</sup>: 529.11946, found: 529.11987.

MP: 174-177 °C.

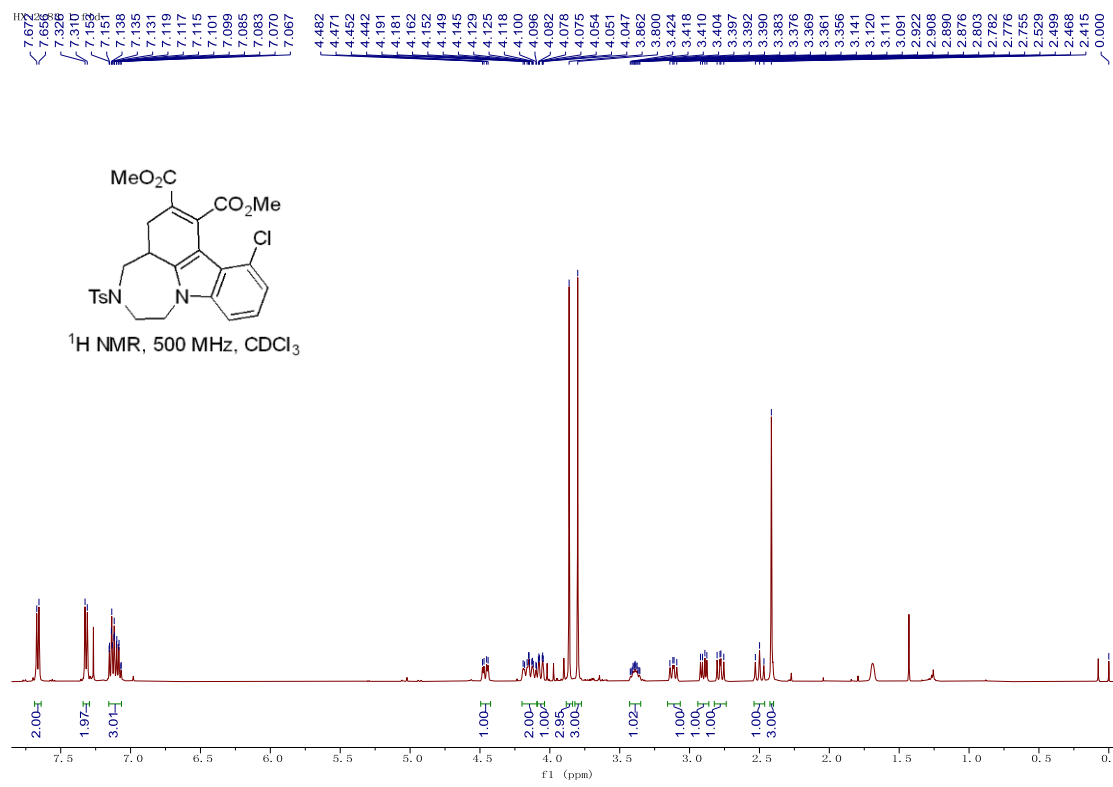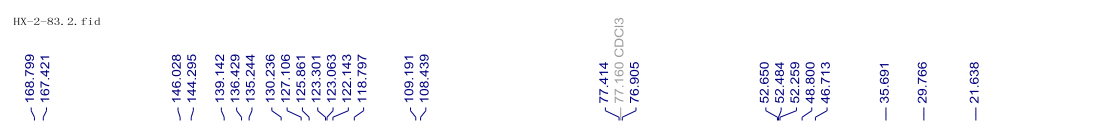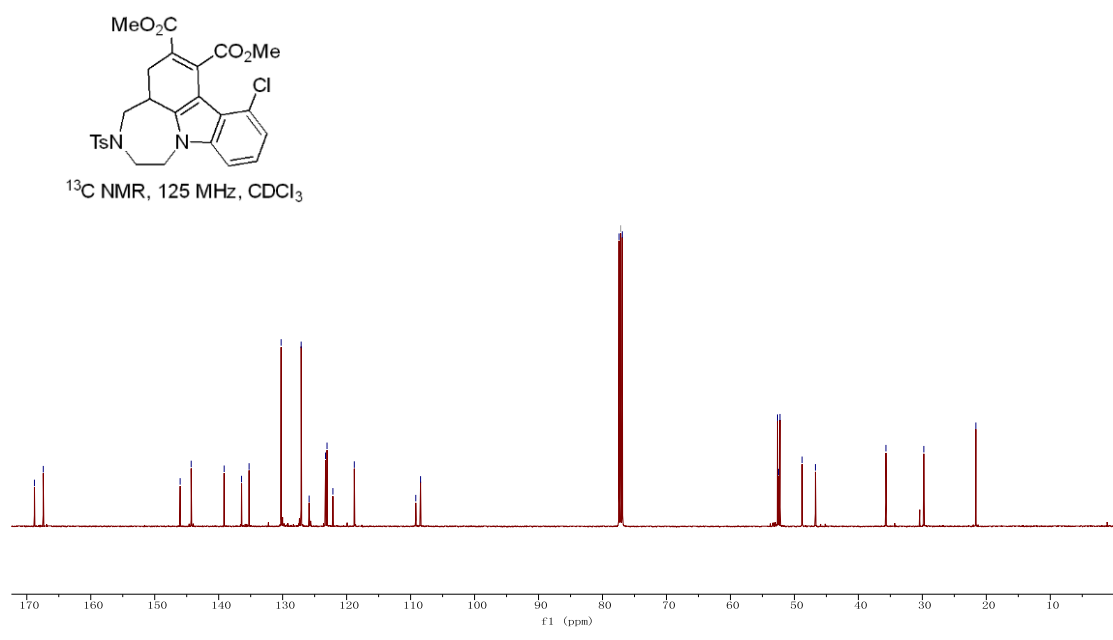

**Dimethyl 11-chloro-3-tosyl-1,2,3,4,4a,5-hexahydro-[1,4]diazepino[6,7,1-*jk*]carbazole-6,7-dicarboxylate (3n)**

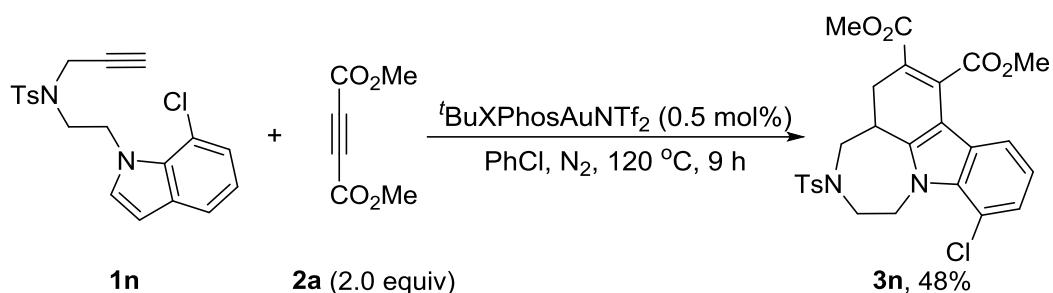

The compound **3n** (yellow solid, 25.4 mg, 48% yield) was obtained following General Procedure B from **1n** (38.6 mg, 0.1 mmol, 1.0 equiv) and **2a** (28.4 mg, 0.2 mmol, 2.0 equiv) using [*t*BuXPhosAuNTf<sub>2</sub>] (0.45 mg, 0.5 mol%) after purification by flash column chromatography using petroleum ether/DCM/THF = 8/4/1 (*R<sub>f</sub>* = 0.44) as eluent.

**<sup>1</sup>H NMR** (600 MHz, CDCl<sub>3</sub>, TMS)  $\delta$  7.65 (d, *J* = 7.8 Hz, 2H), 7.30 (d, *J* = 7.8 Hz, 2H), 7.27-7.25 (m, 1H), 7.14 (dd, *J* = 7.8, 1.2 Hz, 1H), 7.02 (t, *J* = 7.8 Hz, 1H), 5.77 (dd, *J* = 15.6, 5.4 Hz, 1H), 4.21-4.17 (m, 2H), 4.03-4.00 (m, 1H), 3.99 (s, 3H), 3.80 (s, 3H), 3.55-3.50 (m, 1H), 3.11 (dd, *J* = 15.0, 9.6 Hz, 1H), 2.91 (dd, *J* = 15.0, 10.2 Hz, 1H), 2.76 (dd, *J* = 13.2, 10.2 Hz, 1H), 2.63 (dd, *J* = 17.4, 10.8 Hz, 1H), 2.40 (s, 3H).

**<sup>13</sup>C NMR** (150 MHz, CDCl<sub>3</sub>)  $\delta$  169.2, 166.2, 145.5, 144.1, 136.9, 135.1, 132.9, 130.2, 127.2, 126.9, 125.2, 122.6, 117.5, 117.3, 115.0, 108.5, 53.1, 52.8, 52.3, 48.8, 47.4, 34.5, 28.6, 21.6.

**IR** (KBr)  $\nu$  (cm<sup>-1</sup>): 1740, 1431, 1338, 1256, 1245, 1107, 1089, 729, 547 cm<sup>-1</sup>.

**HRMS** (ESI): calcd for C<sub>26</sub>H<sub>26</sub>ClN<sub>2</sub>O<sub>6</sub>S [M+H]<sup>+</sup>: 529.11946, found: 529.11987.

**MP**: 197-199 °C.

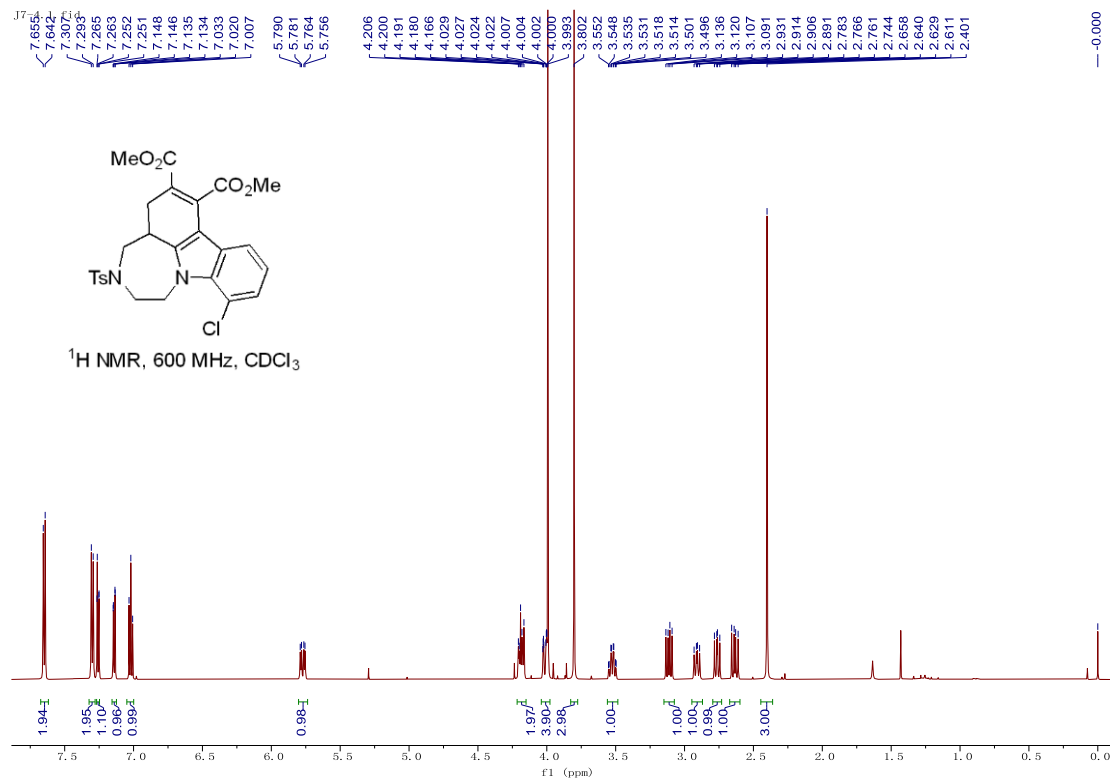

J7-4. 2. f1d

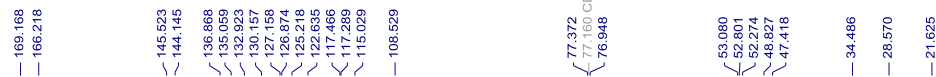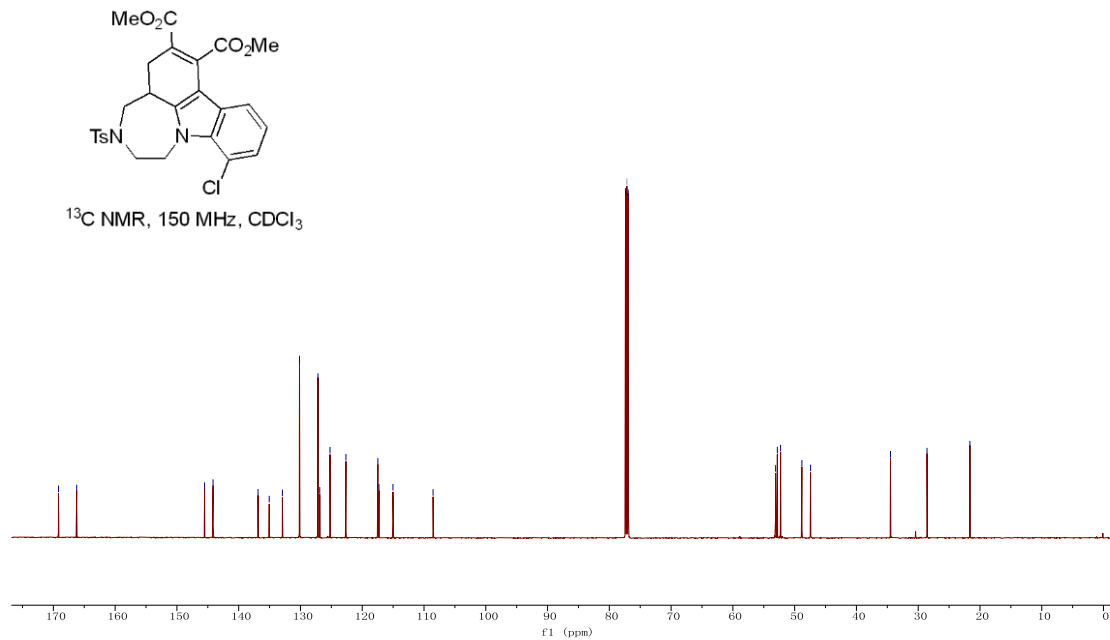

**Dimethyl 8-bromo-3-tosyl-1,2,3,4,4a,5-hexahydro-[1,4]diazepino[6,7,1-*jk*]carbazole-6,7-dicarboxylate (**3o**)**

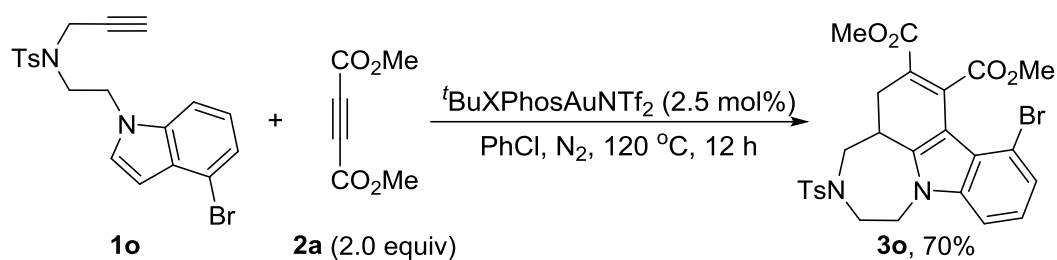

The compound **3o** (white solid, 40.1 mg, 70% yield) was obtained following General Procedure B from **1o** (43.0 mg, 0.1 mmol, 1.0 equiv) and **2a** (28.4 mg, 0.2 mmol, 2.0 equiv) using [ $t\text{BuXPhosAuNTf}_2$ ] (2.25 mg, 2.5 mol%) after purification by flash column chromatography using petroleum ether/DCM/THF = 8/4/1 ( $R_f$  = 0.27) as eluent.

$^1\text{H NMR}$  (500 MHz,  $\text{CDCl}_3$ , TMS)  $\delta$  7.66 (d,  $J$  = 7.5 Hz, 2H), 7.32 (d,  $J$  = 7.5 Hz, 3H), 7.19 (d,  $J$  = 8.0 Hz, 1H), 7.01 (td,  $J$  = 8.0, 1.5 Hz, 1H), 4.45 (dd,  $J$  = 14.5, 5.0 Hz, 1H), 4.19-4.04 (m, 3H), 3.85 (s, 3H), 3.80 (s, 3H), 3.40-3.33 (m, 1H), 3.12 (dd,  $J$  = 14.0, 10.0 Hz, 1H), 2.83 (dd,  $J$  = 15.5, 7.0 Hz, 1H), 2.76 (dd,  $J$  = 14.0, 10.5 Hz, 1H), 2.49 (t,  $J$  = 16.0 Hz, 1H), 2.41 (s, 3H).

$^{13}\text{C NMR}$  (125 MHz,  $\text{CDCl}_3$ )  $\delta$  168.5, 167.9, 146.3, 144.3, 139.0, 135.3, 135.0, 130.2, 127.1, 126.7, 124.0, 123.2, 120.4, 113.8, 109.8, 109.0, 52.7, 52.32, 52.27, 48.8, 46.7, 35.9, 30.2, 21.6.

$\text{IR}$  (KBr)  $\nu$  ( $\text{cm}^{-1}$ ): 1702, 1590, 1433, 1338, 1252, 1236, 1182, 1084, 741  $\text{cm}^{-1}$ .

$\text{HRMS}$  (ESI): calcd for  $\text{C}_{26}\text{H}_{26}\text{N}_2\text{BrO}_6\text{S}$  [ $\text{M}+\text{H}$ ] $^+$ : 573.06895, found: 573.06946.

$\text{MP}$ : 190-194 °C.

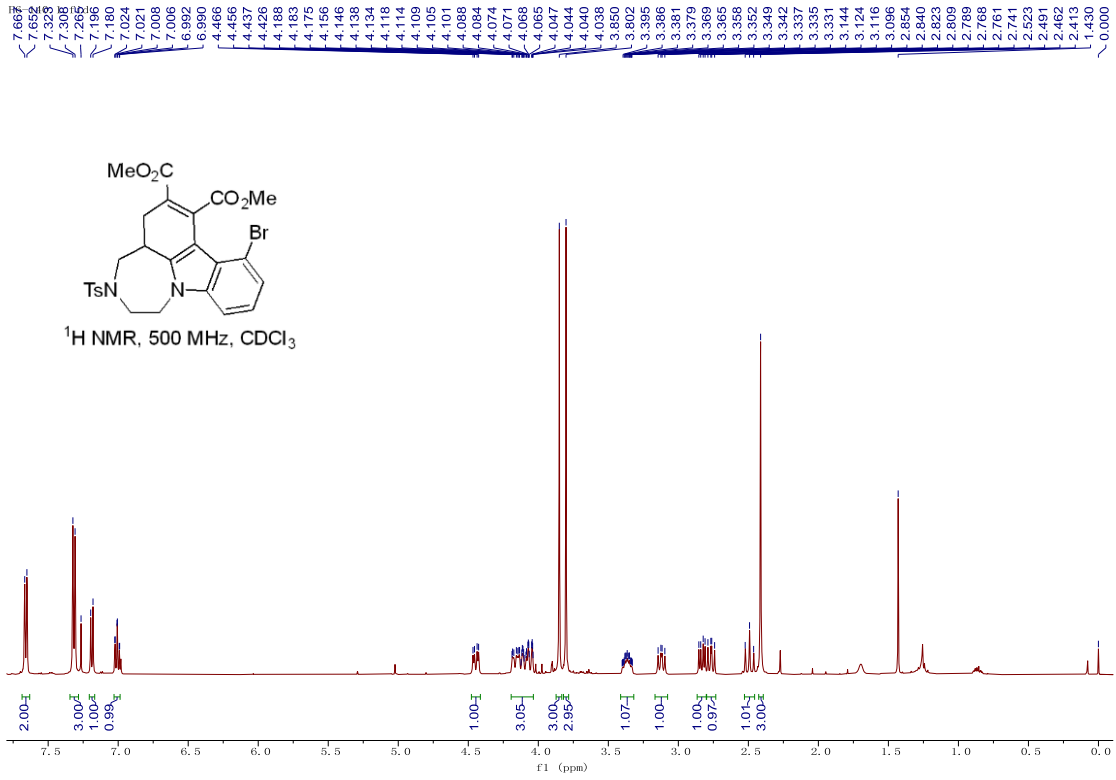

F6-140.2.f1d

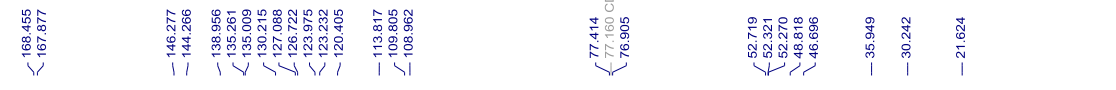



**Dimethyl 9-bromo-3-tosyl-1,2,3,4,4a,5-hexahydro-[1,4]diazepino[6,7,1-*jk*]carbazole-6,7-dicarboxylate (3p)**

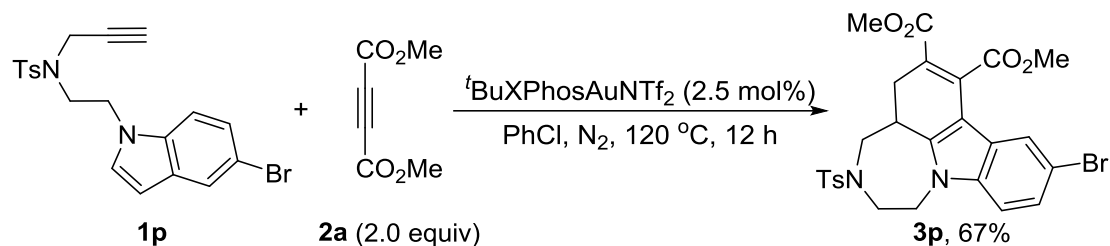

The compound **3p** (yellow solid, 38.4 mg, 67% yield) was obtained following General Procedure B from **1p** (43.0 mg, 0.1 mmol, 1.0 equiv) and **2a** (28.4 mg, 0.2 mmol, 2.0 equiv) using [*t*BuXPhosAuNTf<sub>2</sub>] (2.25 mg, 2.5 mol%) after purification by flash column chromatography using petroleum ether/DCM/THF = 8/4/1 (*R<sub>f</sub>* = 0.34) as eluent.

**<sup>1</sup>H NMR** (500 MHz, CDCl<sub>3</sub>, TMS) δ 7.69-7.66 (m, 2H), 7.45-7.43 (m, 1H), 7.34-7.31 (m, 2H), 7.29-7.24 (m, 1H), 7.10-7.08 (m, 1H), 4.46 (dd, *J* = 15.0, 5.0 Hz, 1H), 4.25 (dt, *J* = 14.0, 5.0 Hz, 1H), 4.14-4.07 (m, 2H), 4.01 (s, 3H), 3.79 (s, 3H), 3.61-3.53 (m, 1H), 3.15-3.08 (m, 1H), 3.04 (dd, *J* = 14.0, 10.5 Hz, 1H), 2.78 (dd, *J* = 14.0, 10.5 Hz, 1H), 2.46-2.39 (m, 4H).

**<sup>13</sup>C NMR** (125 MHz, CDCl<sub>3</sub>) δ 169.1, 166.2, 144.3, 144.1, 137.2, 136.6, 135.4, 130.2, 127.1, 125.6, 125.1, 121.3, 115.3, 114.6, 111.3, 107.8, 53.6, 52.8, 52.3, 49.1, 47.2, 35.7, 28.1, 21.7.

**IR** (KBr)  $\nu$ (cm<sup>-1</sup>): 1734, 1701, 1463, 1434, 1340, 1293, 1257, 1203, 1159, 735 cm<sup>-1</sup>.

**HRMS** (ESI): calcd for C<sub>26</sub>H<sub>26</sub>N<sub>2</sub>BrO<sub>6</sub>S [M+H]<sup>+</sup>: 573.06895, found: 573.06915.

**MP**: 155-158 °C.

J7-3. 2. fid

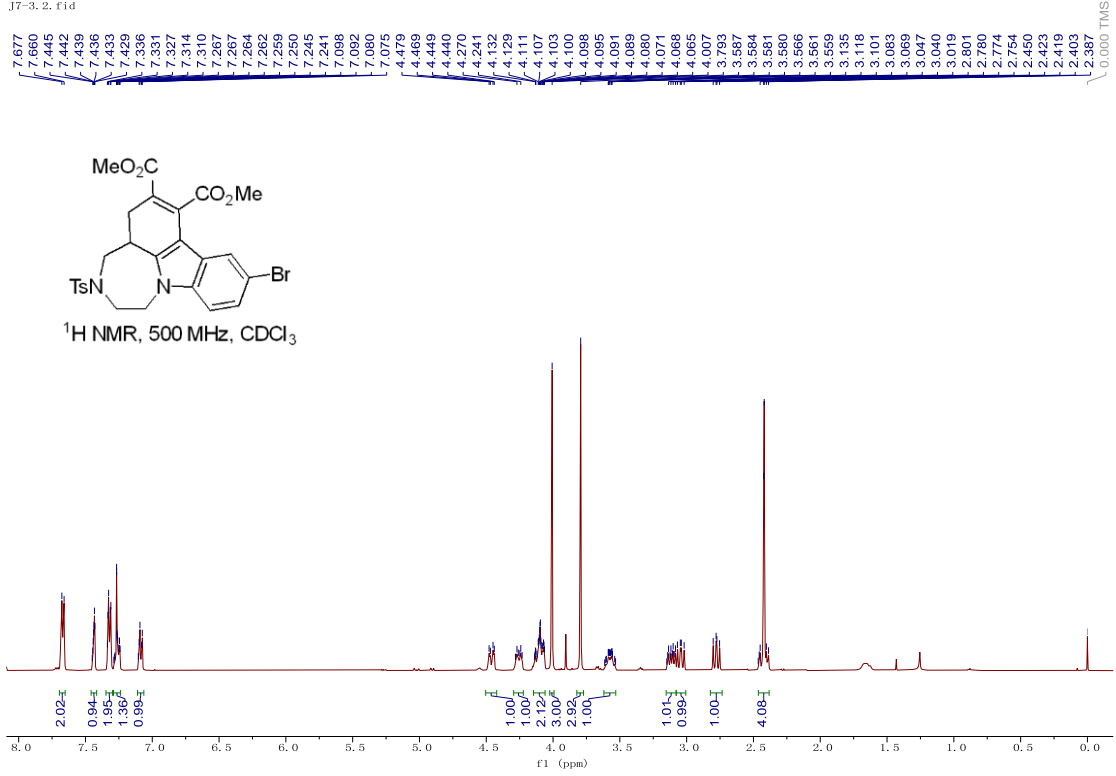

J7-3. 3. fid

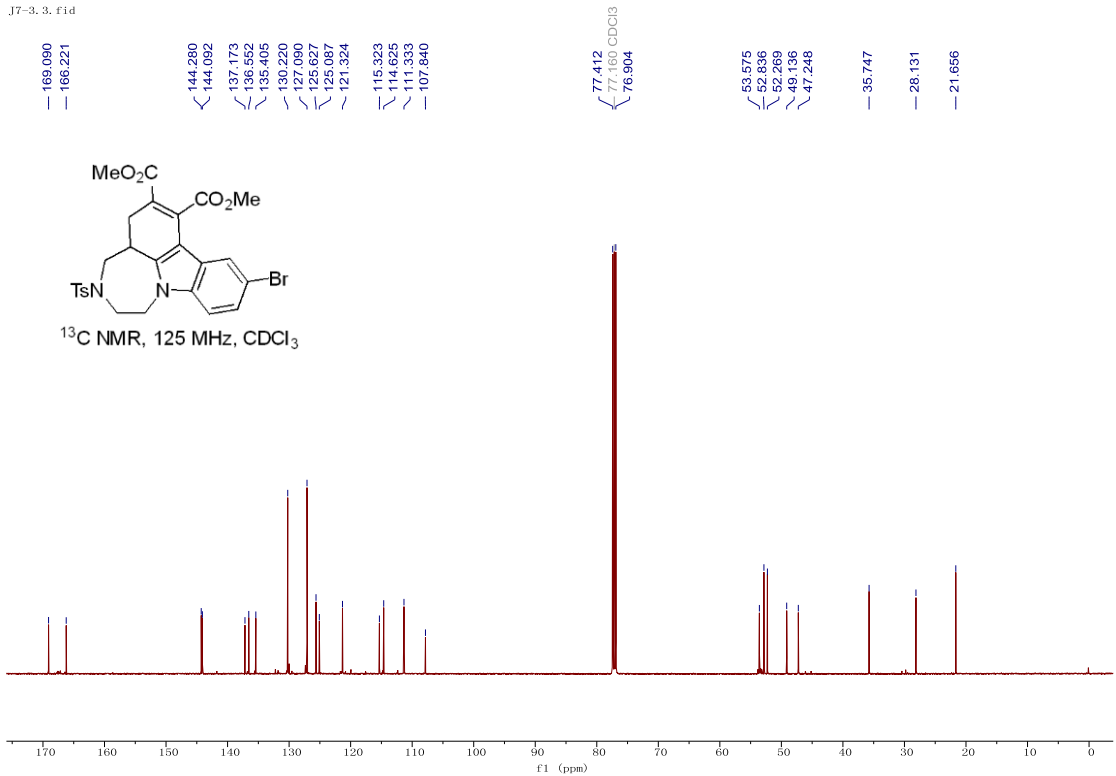

**Dimethyl 10-bromo-3-tosyl-1,2,3,4,4a,5-hexahydro-[1,4]diazepino[6,7,1-*jk*]carbazole-6,7-dicarboxylate (3q)**

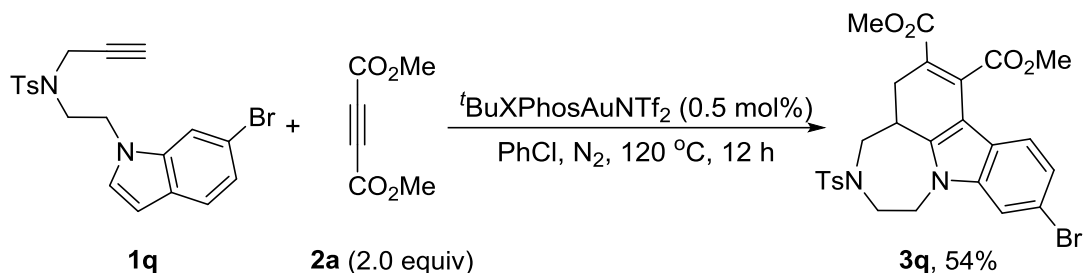

The compound **3q** (yellow solid, 31.0 mg, 54% yield) was obtained following General Procedure B from **1q** (43.0 mg, 0.1 mmol, 1.0 equiv) and **2a** (28.4 mg, 0.2 mmol, 2.0 equiv) using [*t*BuXPhosAuNTf<sub>2</sub>] (0.45 mg, 0.5 mol%) after purification by flash column chromatography using petroleum ether/DCM/THF = 12/4/1 (*R<sub>f</sub>* = 0.15) as eluent.

**<sup>1</sup>H NMR** (500 MHz, DMSO-*d*<sub>6</sub>, TMS)  $\delta$  7.87-7.86 (m, 1H), 7.79 (d, *J* = 8.0 Hz, 2H), 7.45 (d, *J* = 8.0 Hz, 2H), 7.30-7.27 (m, 1H), 7.16 (d, *J* = 8.5 Hz, 1H), 4.81 (dd, *J* = 14.0, 4.0 Hz, 1H), 4.15-4.00 (m, 3H), 3.92 (s, 3H), 3.75 (s, 3H), 3.63-3.56 (m, 1H), 3.20 (dd, *J* = 13.5, 12.0 Hz, 1H), 3.08-2.97 (m, 2H), 2.55-2.53 (m, 1H), 2.41 (s, 3H).

**<sup>13</sup>C NMR** (125 MHz, DMSO-*d*<sub>6</sub>)  $\delta$  168.4, 165.6, 144.6, 143.6, 138.3, 136.5, 135.3, 130.1, 127.0, 124.3, 121.7, 119.1, 114.9, 114.3, 114.0, 107.0, 52.4, 51.9, 48.5, 46.4, 40.4, 35.0, 27.6, 21.0.

**IR** (KBr)  $\nu$  (cm<sup>-1</sup>): 1731, 1696, 1257, 1238, 1206, 1158, 1106, 1027, 736 cm<sup>-1</sup>.

**HRMS** (ESI): calcd for C<sub>26</sub>H<sub>26</sub>N<sub>2</sub>BrO<sub>6</sub>S [M+H]<sup>+</sup>: 573.06895, found: 573.06915.

**MP**: 215-218 °C.

HX-2-55. 1. fid

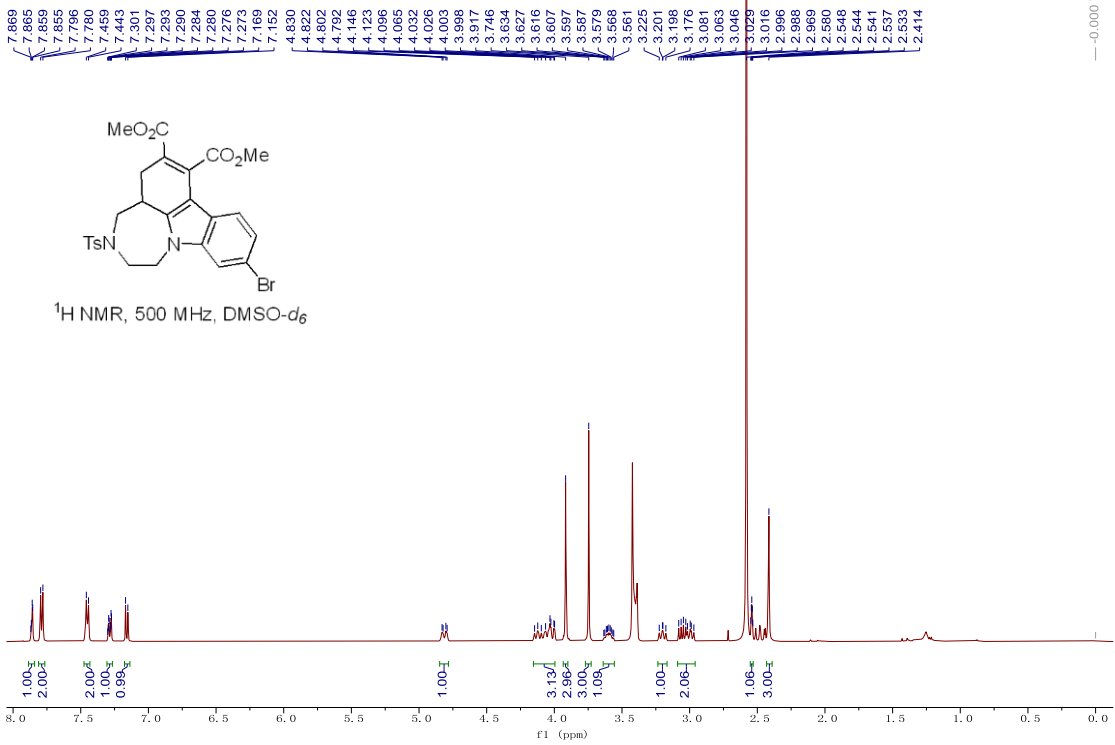

-0.000 TMS

HX-2-55. 2. fid

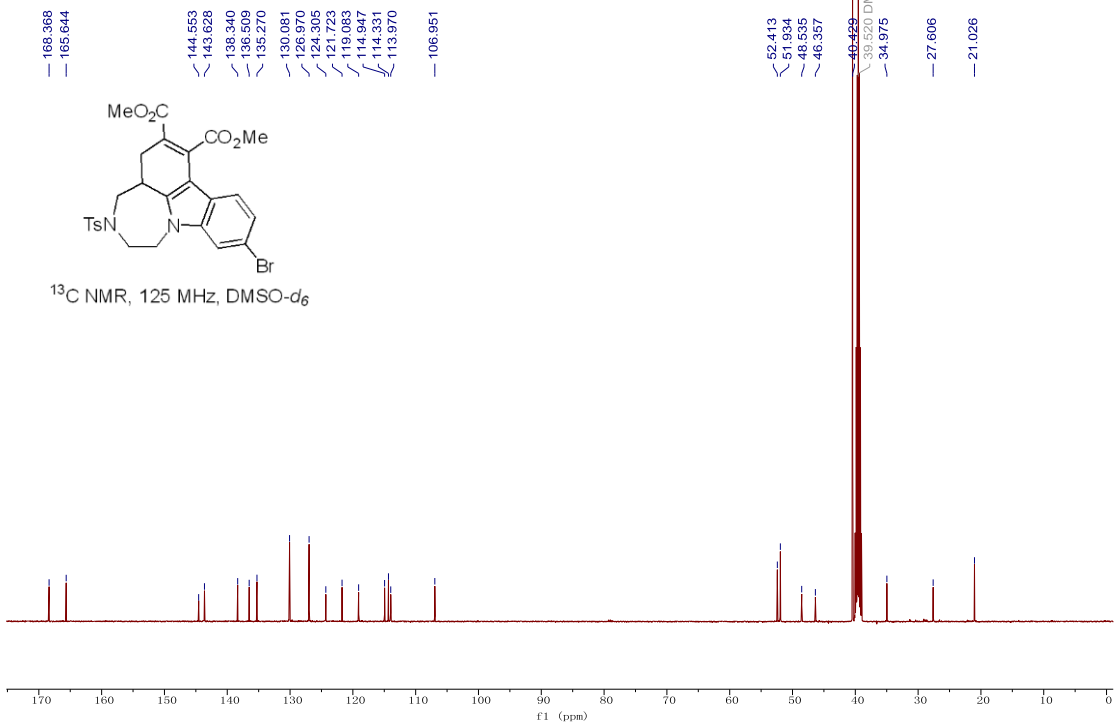

**Dimethyl 11-bromo-3-tosyl-1,2,3,4,4a,5-hexahydro-[1,4]diazepino[6,7,1-*jk*]carbazole-6,7-dicarboxylate (3r)**

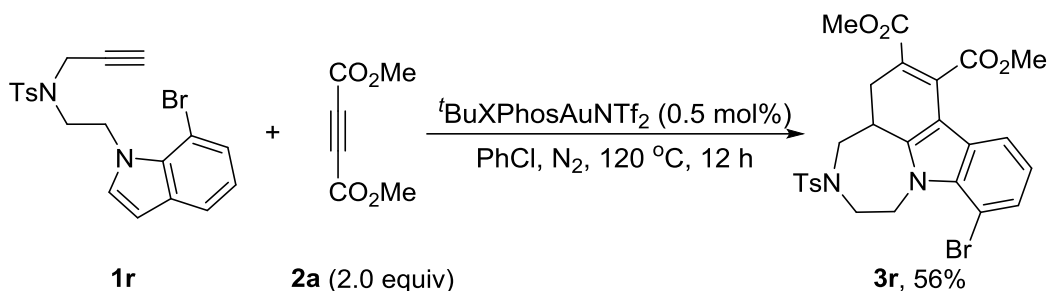

The compound **3r** (white solid, 32.1 mg, 56% yield) was obtained following General Procedure B from **1r** (43.0 mg, 0.1 mmol, 1.0 equiv) and **2a** (28.4 mg, 0.2 mmol, 2.0 equiv) using [*t*BuXPhosAuNTf<sub>2</sub>] (0.45 mg, 0.5 mol%) after purification by flash column chromatography using petroleum ether/DCM/THF = 12/4/1 (*R<sub>f</sub>* = 0.15) as eluent.

**<sup>1</sup>H NMR** (600 MHz, CDCl<sub>3</sub>, TMS)  $\delta$  7.64 (d, *J* = 8.4 Hz, 2H), 7.34 (dd, *J* = 7.8, 0.6 Hz, 1H), 7.31-7.29 (m, 3H), 6.95 (t, *J* = 7.8 Hz, 1H), 5.92 (dd, *J* = 15.6, 6.0 Hz, 1H), 4.19 (dd, *J* = 13.8, 5.4 Hz, 1H), 4.11 (dd, *J* = 15.6, 9.6 Hz, 1H), 4.02-3.99 (m, 4H), 3.80 (s, 3H), 3.55-3.49 (m, 1H), 3.11 (dd, *J* = 17.4, 9.6 Hz, 1H), 2.88 (dd, *J* = 13.8, 9.6 Hz, 1H), 2.76 (dd, *J* = 12.6, 9.6 Hz, 1H), 2.64 (dd, *J* = 17.4, 10.8 Hz, 1H), 2.40 (s, 3H).

**<sup>13</sup>C NMR** (150 MHz, CDCl<sub>3</sub>)  $\delta$  169.2, 166.2, 145.8, 144.1, 136.7, 135.0, 134.0, 130.1, 128.7, 127.1, 127.0, 123.0, 118.0, 115.1, 108.3, 104.4, 53.0, 52.8, 52.3, 48.6, 46.9, 34.4, 28.5, 21.6.

**IR** (KBr)  $\nu$  (cm<sup>-1</sup>): 1738, 1708, 1255, 1244, 1196, 1162, 1106, 1087, 731 cm<sup>-1</sup>.

**HRMS** (ESI): calcd for C<sub>26</sub>H<sub>26</sub>N<sub>2</sub>BrO<sub>6</sub>S [M+H]<sup>+</sup>: 573.06895, found: 573.06915.

**MP**: 203-205 °C.

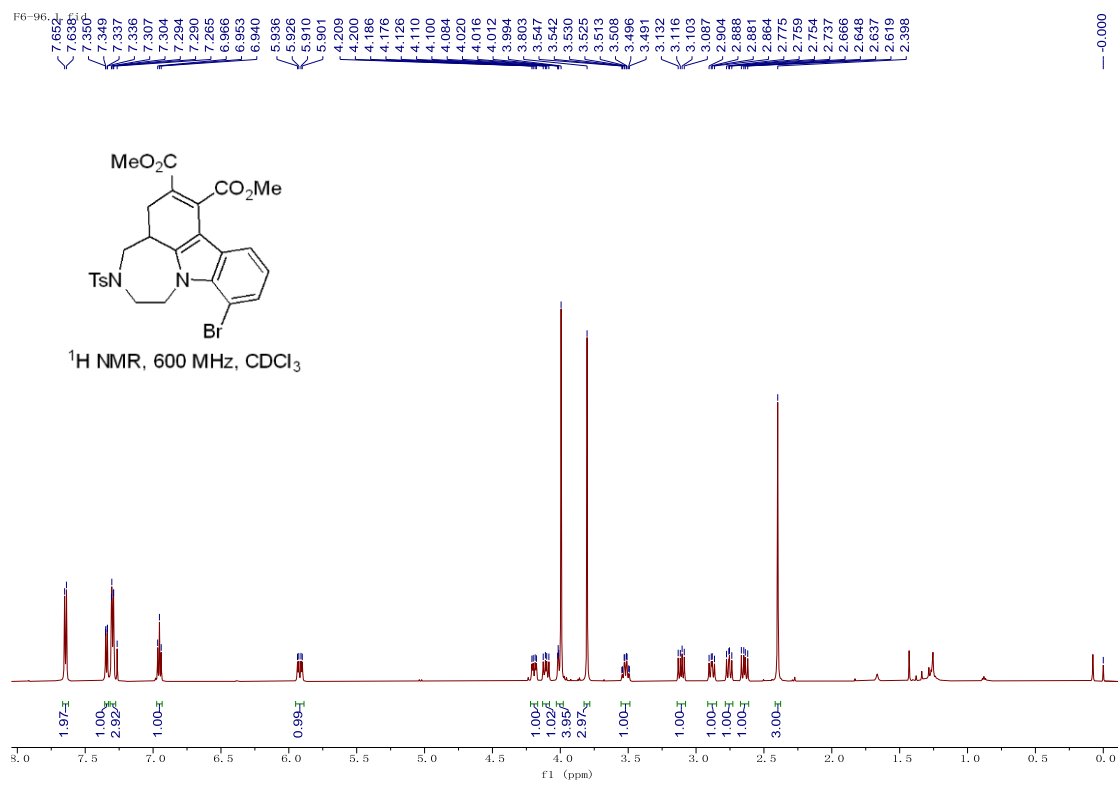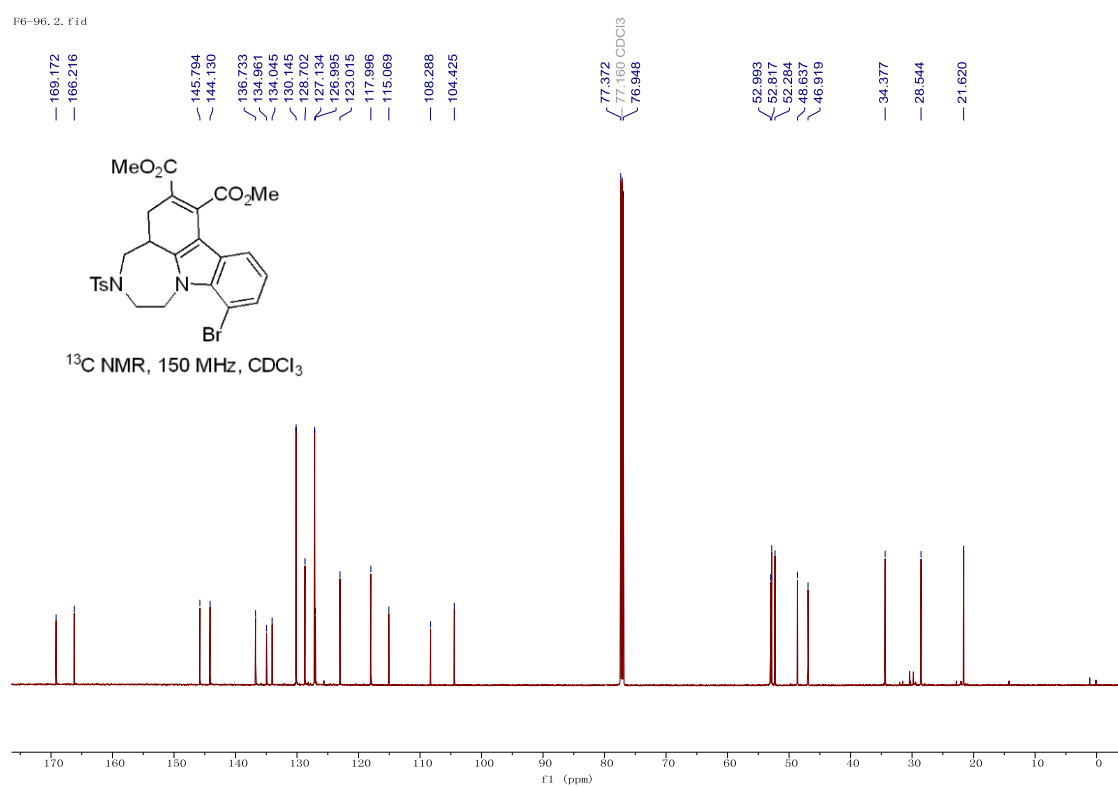

**Dimethyl 1,2,4a,5-tetrahydro-4*H*-[1,4]oxazepino[6,5,4-*jk*]carbazole-6,7-dicarboxylate (**3s**)**

**Dimethyl 1,2-dihydro-4*H*-[1,4]oxazepino[6,5,4-*jk*]carbazole-6,7-dicarboxylate (**3s'**)**

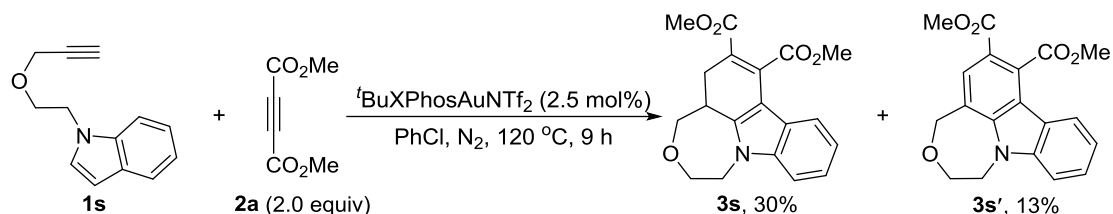

The compound **3s** (yellow solid, 20.4 mg, 30% yield) and **3s'** (white solid, 8.8 mg, 13% yield) were obtained following General Procedure B from **1s** (39.8 mg, 0.2 mmol, 1.0 equiv) and **2a** (56.8 mg, 0.4 mmol, 2.0 equiv) using [ $t\text{BuXPhosAuNTf}_2$ ] (4.5 mg, 2.5 mol%) after purification by flash column chromatography using petroleum ether/DCM/THF = 8/4/1 ( $R_f(3s)$  = 0.34) and petroleum ether/DCM/THF = 10/4/1 ( $R_f(3s')$  = 0.15) as eluent.

$^1\text{H NMR}$  (500 MHz,  $\text{CDCl}_3$ , TMS)  $\delta$  7.41 (dt,  $J$  = 8.0, 1.0 Hz, 1H), 7.28-7.26 (m, 1H), 7.22 (td,  $J$  = 7.0, 1.0 Hz, 1H), 7.17-7.14 (m, 1H), 4.46 (ddd,  $J$  = 14.5, 3.5, 1.0 Hz, 1H), 4.37 (ddd,  $J$  = 13.0, 3.5, 2.0 Hz, 1H), 4.20 (dd,  $J$  = 12.0, 4.0 Hz, 1H), 4.16-4.10 (m, 1H), 4.03 (s, 3H), 3.86-3.81 (m, 1H), 3.79 (s, 3H), 3.69-3.62 (m, 1H), 3.57 (dd,  $J$  = 12.0, 10.5 Hz, 1H), 3.00 (dd,  $J$  = 17.0, 8.5 Hz, 1H), 2.29 (t,  $J$  = 16.5 Hz, 1H).

$^{13}\text{C NMR}$  (125 MHz,  $\text{CDCl}_3$ )  $\delta$  169.6, 166.6, 144.5, 138.2, 137.9, 123.7, 122.6, 121.9, 118.6, 113.8, 109.9, 108.2, 75.9, 71.5, 52.7, 52.1, 48.9, 37.5, 26.0.

**IR** (KBr)  $\nu(\text{cm}^{-1})$ : 1732, 1695, 1602, 1464, 1434, 1257, 1237, 1080, 744.23  $\text{cm}^{-1}$ .

**HRMS** (ESI): calcd for  $\text{C}_{19}\text{H}_{20}\text{NO}_5$  [ $\text{M}+\text{H}$ ] $^+$ : 342.13360, found: 342.13379.

**MP**: 131-135 °C.

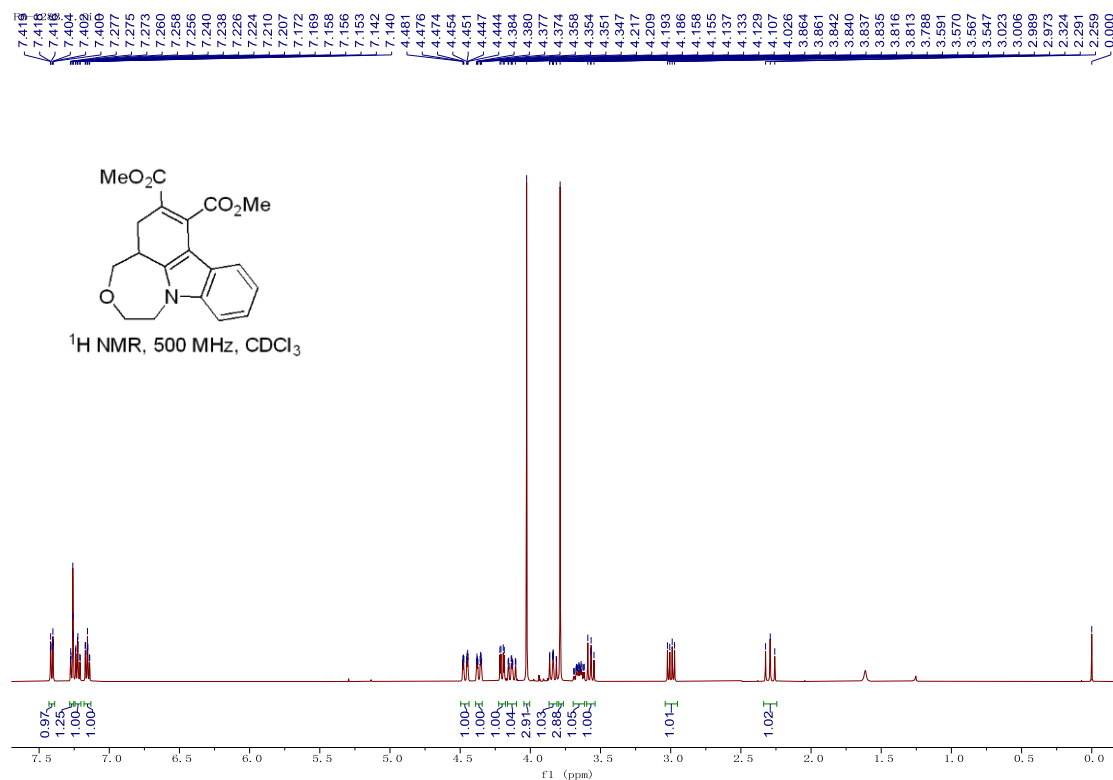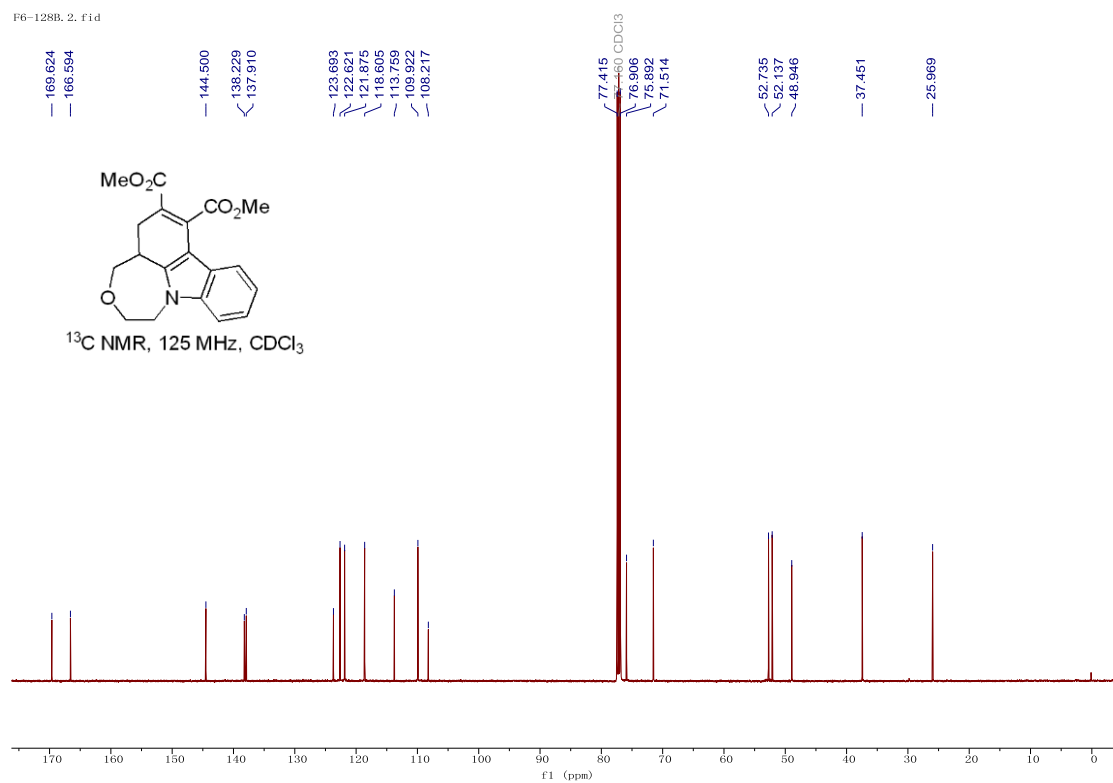

<sup>1</sup>H NMR (500 MHz, CDCl<sub>3</sub>, TMS) δ 7.93 (d, *J* = 8.0 Hz, 1H), 7.88 (s, 1H), 7.56-7.53 (m, 1H), 7.43 (d, *J* = 8.0 Hz, 1H), 7.32-7.29 (m, 1H), 5.13 (s, 2H), 4.36-4.34 (m, 2H), 4.31-4.29 (m, 2H), 4.15 (s, 3H), 3.94 (s, 3H).



$^{13}\text{C}$  NMR (125 MHz,  $\text{CDCl}_3$ )  $\delta$  170.1, 166.5, 142.3, 142.0, 128.7, 127.4, 125.0, 124.7, 121.8, 121.7, 121.20, 121.18, 117.8, 109.9, 75.6, 71.0, 53.1, 52.5, 49.4.

IR (KBr)  $\nu(\text{cm}^{-1})$ : 1732, 1574, 1433, 1418, 1326, 1267, 1233, 1144, 1099, 749  $\text{cm}^{-1}$ .

HRMS (ESI): calcd for  $\text{C}_{19}\text{H}_{17}\text{NNaO}_5$   $[\text{M}+\text{Na}]^+$ : 362.09989, found: 362.09995.

MP: 160-162  $^\circ\text{C}$ .

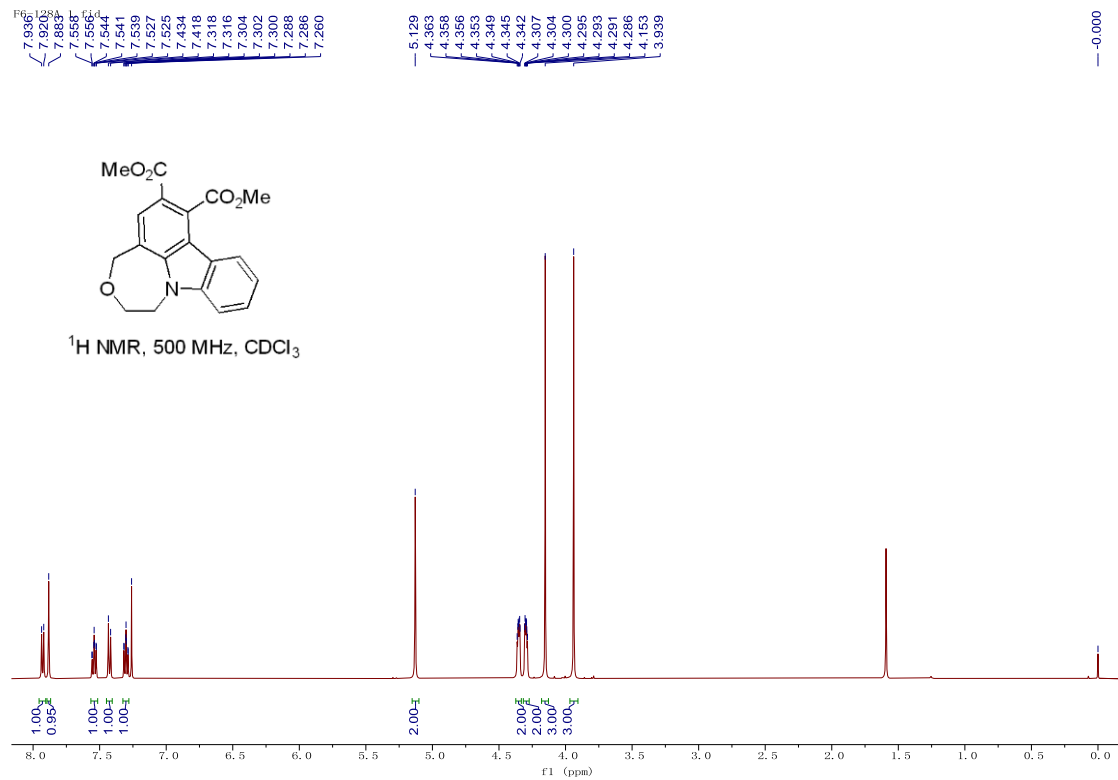

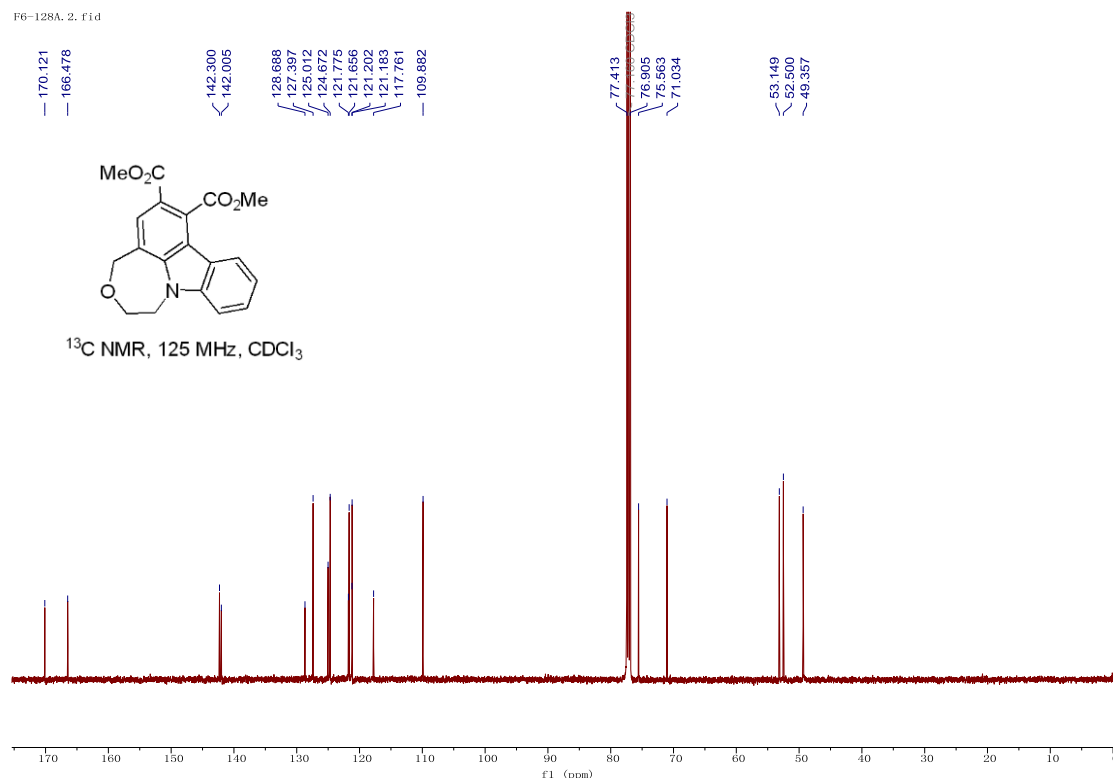

### Dimethyl 3a,4,5,6,7,8-hexahydro-3H-azocino[3,2,1-*jk*]carbazole-1,2-dicarboxylate (**3t**)

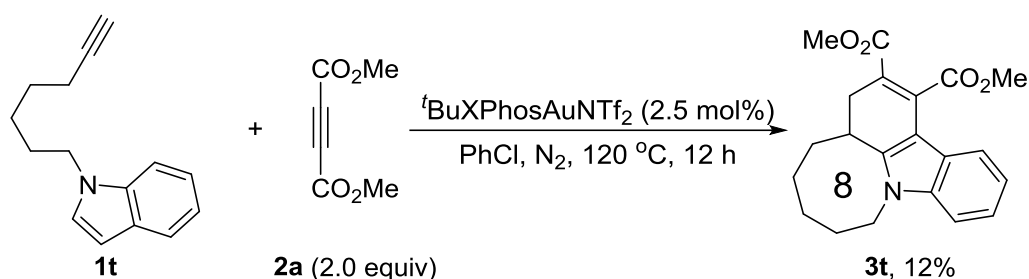

The compound **3t** (yellow oil, 4.1 mg, 12% yield) was obtained following General Procedure B from **1t** (21.1 mg, 0.1 mmol, 1.0 equiv) and **2a** (28.4 mg, 0.2 mmol, 2.0 equiv) using [ $t\text{BuXPhosAuNTf}_2$ ] (2.25 mg, 2.5 mol%) after purification by flash column chromatography using petroleum ether/DCM/THF = 10/4/1 ( $R_f$  = 0.27) as eluent.

<sup>1</sup>H NMR (600 MHz, CDCl<sub>3</sub>, TMS)  $\delta$  7.44 (dt,  $J$  = 7.8, 1.2 Hz, 1H), 7.31 (dt,  $J$  = 7.8, 1.2 Hz, 1H), 7.21-7.18 (m, 1H), 7.16-7.13 (m, 1H), 4.44-4.40 (m, 1H), 4.14-4.08 (m, 1H), 4.03 (s, 3H), 3.78 (s, 3H), 3.08-3.04 (m, 1H), 2.98 (dd,  $J$  = 16.8, 1.8 Hz, 1H), 2.90 (dd,  $J$  = 16.8, 7.8 Hz, 1H), 1.94-1.88 (m, 1H), 1.84-1.73 (m, 2H), 1.66-1.61 (m, 1H), 1.53-1.49 (m, 1H), 1.45-1.36 (m, 2H), 0.85-0.80 (m, 1H).

$^{13}\text{C}$  NMR (150 MHz,  $\text{CDCl}_3$ )  $\delta$  170.0, 167.4, 146.3, 138.1, 136.6, 124.3, 121.9, 121.6, 118.6, 112.6, 110.0, 105.5, 52.6, 52.0, 41.5, 35.5, 31.1, 31.0, 29.8, 25.0, 24.2.

IR (KBr)  $\nu(\text{cm}^{-1})$ : 1737, 1698, 1594, 1474, 1459, 1296, 1275, 1154, 744  $\text{cm}^{-1}$ .

HRMS (ESI): calcd for  $\text{C}_{21}\text{H}_{24}\text{NO}_4$   $[\text{M}+\text{H}]^+$ : 354.16998, found: 354.17014.

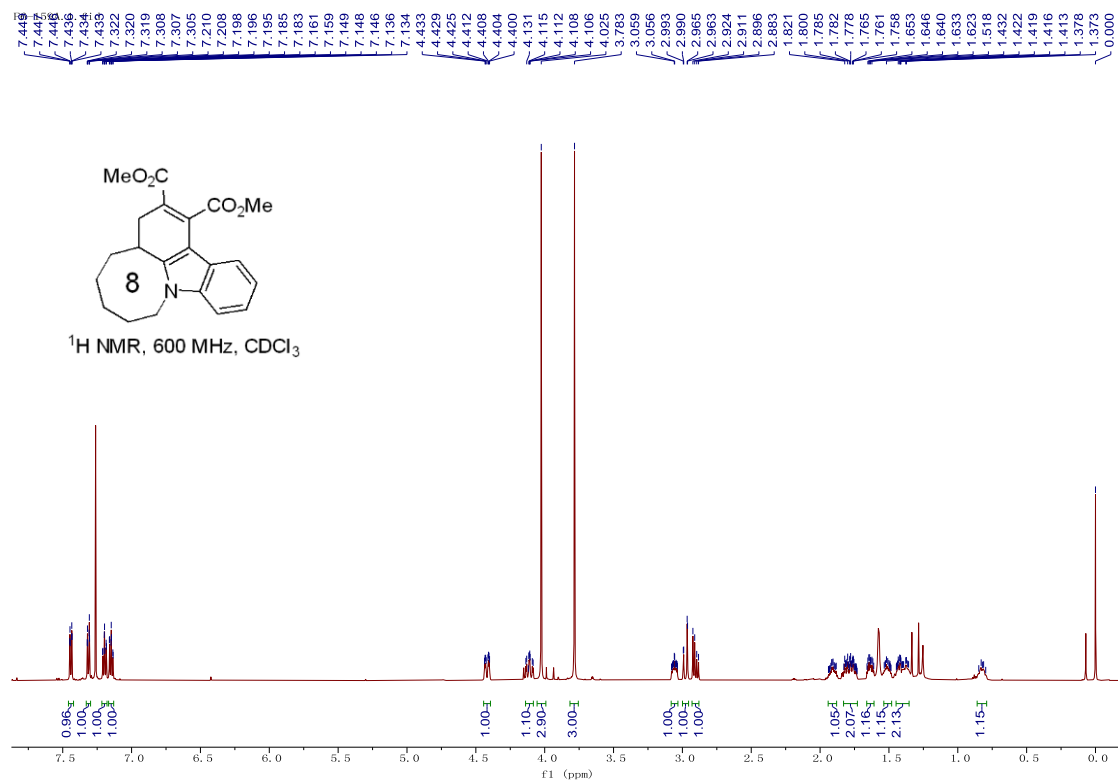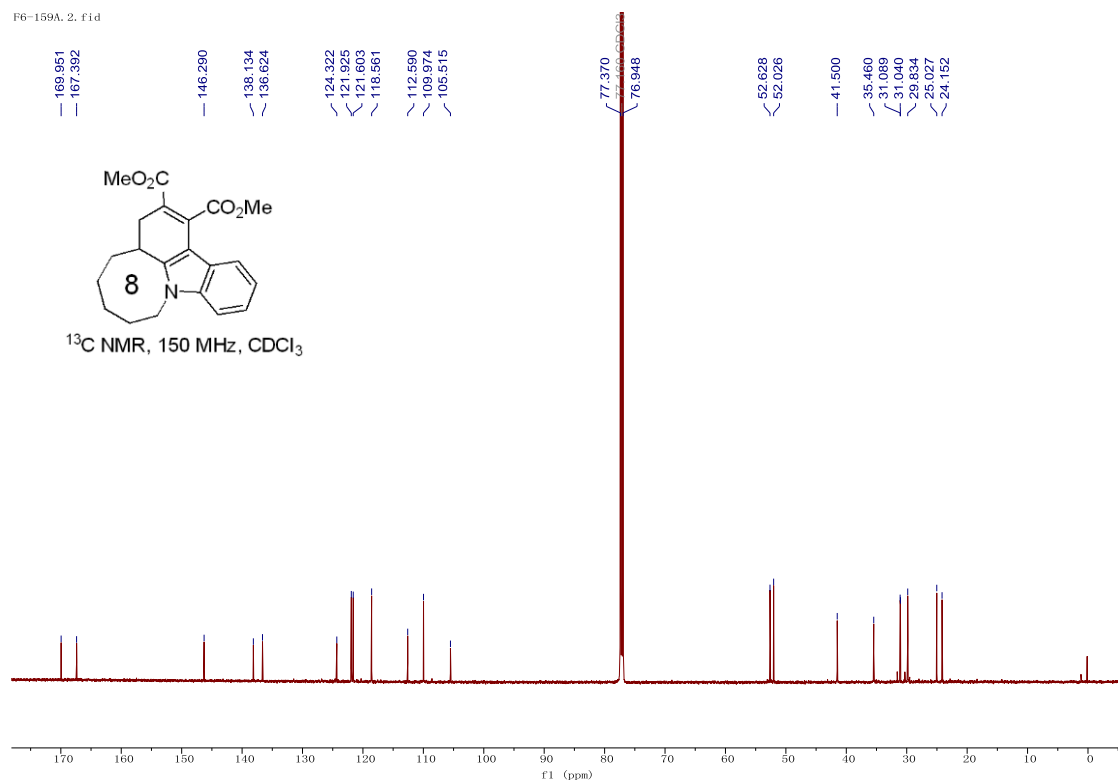

**Diethyl 3-tosyl-1,2,3,4,4a,5-hexahydro-[1,4]diazepino[6,7,1-*jk*]carbazole-6,7-dicarboxylate (**3u**)**

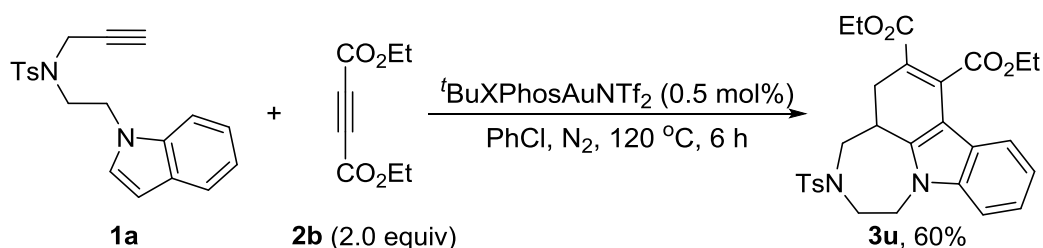

The compound **3u** (white solid, 31.4 mg, 60% yield) was obtained following General Procedure B from **1a** (35.2 mg, 0.1 mmol, 1.0 equiv) and **2b** (34.0 mg, 0.2 mmol, 2.0 equiv) using [*t*BuXPhosAuNTf<sub>2</sub>] (0.45 mg, 0.5 mol%) after purification by flash column chromatography using petroleum ether/DCM/THF = 10/4/1 (*R<sub>f</sub>* = 0.10) as eluent.

**<sup>1</sup>H NMR** (600 MHz, CDCl<sub>3</sub>, TMS)  $\delta$  7.69 (d, *J* = 7.8 Hz, 2H), 7.42 (d, *J* = 8.4 Hz, 1H), 7.33 (d, *J* = 7.8 Hz, 2H), 7.24-7.19 (m, 2H), 7.14-7.11 (m, 1H), 4.53-4.47 (m, 3H), 4.29-4.22 (m, 3H), 4.13-4.08 (m, 2H), 3.61-3.54 (m, 1H), 3.12 (dd, *J* = 16.8, 9.0 Hz, 1H), 3.05 (dd, *J* = 14.4, 10.8 Hz, 1H), 2.76 (dd, *J* = 13.8, 10.8 Hz, 1H), 2.44-2.39 (m, 4H), 1.39 (t, *J* = 7.2 Hz, 3H), 1.33 (t, *J* = 7.2 Hz, 3H).

**<sup>13</sup>C NMR** (150 MHz, CDCl<sub>3</sub>)  $\delta$  169.0, 165.9, 144.2, 143.2, 137.85, 137.75, 135.5, 130.2, 127.1, 123.6, 122.7, 121.8, 118.8, 114.1, 109.8, 108.5, 61.8, 61.0, 53.8, 49.3, 46.9, 35.8, 28.4, 21.6, 14.4, 14.2.

**IR** (KBr)  $\nu$  (cm<sup>-1</sup>): 1729, 1693, 1461, 1255, 1236, 1201, 1162, 1106, 744 cm<sup>-1</sup>.

**HRMS** (ESI): calcd for C<sub>28</sub>H<sub>31</sub>N<sub>2</sub>O<sub>6</sub>S [M+H]<sup>+</sup>: 523.18973, found: 523.19019.

**MP**: 87-90 °C.

7.698  
7.685  
7.422  
7.408  
7.335  
7.320  
7.262  
7.244  
7.230  
7.218  
7.216  
7.206  
7.204  
7.192  
7.191  
7.139  
7.137  
7.128  
7.126  
7.124  
7.114  
7.112  
4.852  
4.846  
4.844  
4.803  
4.803  
4.491  
4.491  
4.479  
4.467  
4.288  
4.284  
4.279  
4.276  
4.270  
4.264  
4.258  
4.252  
4.246  
4.240  
4.234  
4.228  
4.129  
4.126  
4.123  
4.109  
4.106  
4.103  
4.100  
3.145  
3.140  
3.137  
3.102  
3.067  
3.049  
3.043  
3.025  
2.784  
2.766  
2.761  
2.744  
2.443  
2.422  
2.415  
2.390  
1.402  
1.390  
1.378  
1.345  
1.333  
0.000

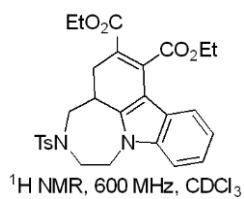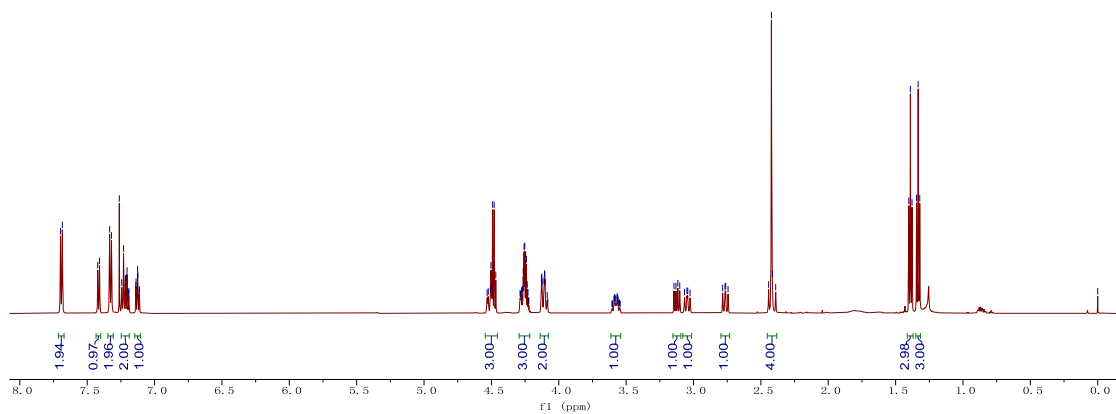

HX-2-49R. 2. F1d

165.996  
165.935  
144.179  
143.164  
137.847  
137.753  
135.515  
130.197  
127.106  
123.636  
122.698  
121.838  
118.794  
114.139  
109.809  
108.532  
77.372  
77.160 CDCl<sub>3</sub>  
76.948  
61.766  
60.964  
53.790  
49.930  
46.935  
35.773  
28.357  
21.644  
14.384  
14.154

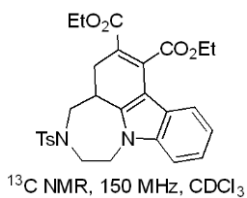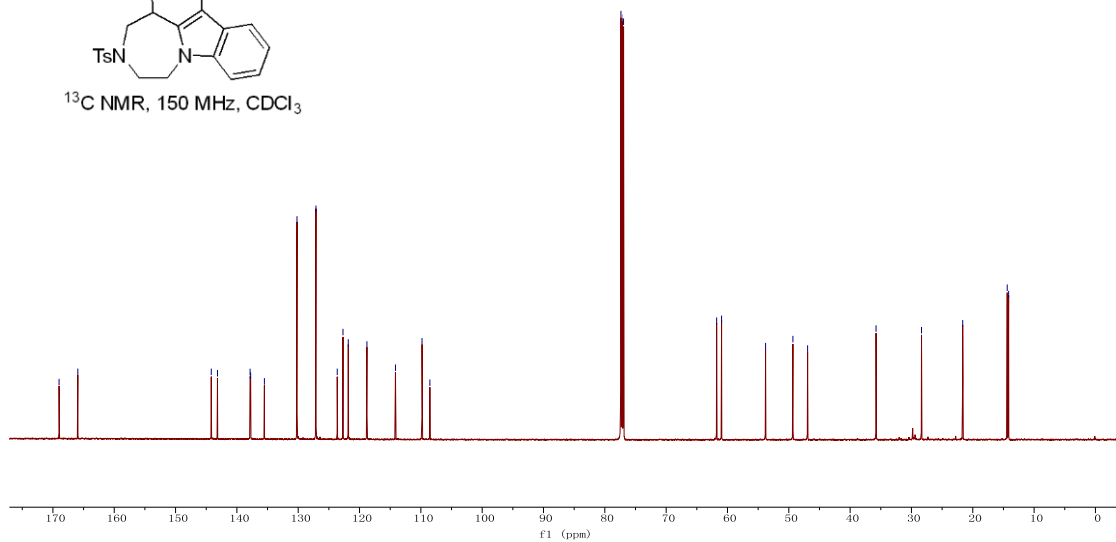

**6-tosyl-3a,4,4a,5,6,7,8,13c-octahydro-[1,4]diazepino[1,7,6-*lm*]furo[3,4-*c*]carbazole-1,3-dione (5a)**

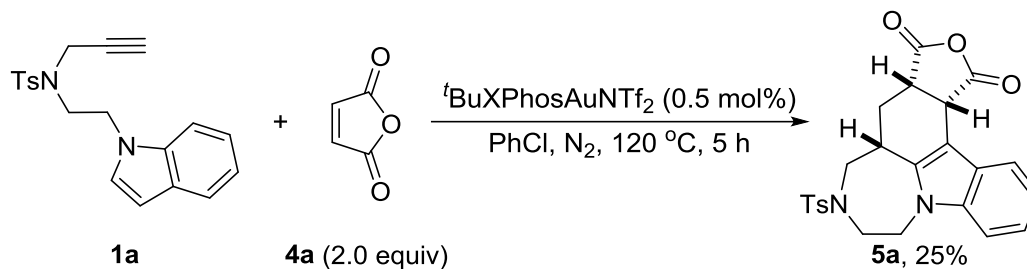

The compound **5a** (yellow solid, 11.3 mg, 25% yield) was obtained following General Procedure B from **1a** (35.4 mg, 0.1 mmol, 1.0 equiv) and **4a** (19.6 mg, 0.2 mmol, 2.0 equiv) using [*t*BuXPhosAuNTf<sub>2</sub>] (0.45 mg, 0.5 mol%) after purification by flash column chromatography using EtOAc (*R<sub>f</sub>* = 0.10) as eluent.

**<sup>1</sup>H NMR** (500 MHz, DMSO-*d*<sub>6</sub>, TMS)  $\delta$  7.70 (dt, *J* = 8.5, 2.0 Hz, 2H), 7.65 (d, *J* = 8.0 Hz, 1H), 7.44 (d, *J* = 8.0 Hz, 1H), 7.40 (d, *J* = 8.0 Hz, 2H), 7.18-7.15 (m, 1H), 7.09-7.06 (m, 1H), 4.75 (dd, *J* = 15.0, 4.5 Hz, 1H), 4.70 (dd, *J* = 8.0, 2.0 Hz, 1H), 4.11 (dd, *J* = 14.0, 4.5 Hz, 1H), 4.01-3.92 (m, 2H), 3.75-3.70 (m, 1H), 3.32-3.30 (m, 1H), 2.92 (dd, *J* = 13.5, 10.0 Hz, 1H), 2.62 (dd, *J* = 13.5, 10.0 Hz, 1H), 2.39-2.35 (m, 4H), 1.89-1.82 (m, 1H).

**<sup>13</sup>C NMR** (125 MHz, DMSO-*d*<sub>6</sub>)  $\delta$  173.7, 171.2, 143.6, 138.9, 136.6, 135.3, 130.0, 126.9, 125.4, 121.8, 119.5, 119.4, 109.6, 101.3, 54.9, 52.8, 49.2, 45.6, 35.7, 33.8, 27.6, 21.0.

**IR** (KBr)  $\nu$  (cm<sup>-1</sup>): 1782, 1467, 1387, 1327, 1156, 1107, 1012, 905, 740 cm<sup>-1</sup>.

**HRMS** (ESI): calcd for C<sub>24</sub>H<sub>23</sub>N<sub>2</sub>O<sub>5</sub>S [M+H]<sup>+</sup>: 451.13222, found: 451.13239.

**MP**: 136-140 °C.

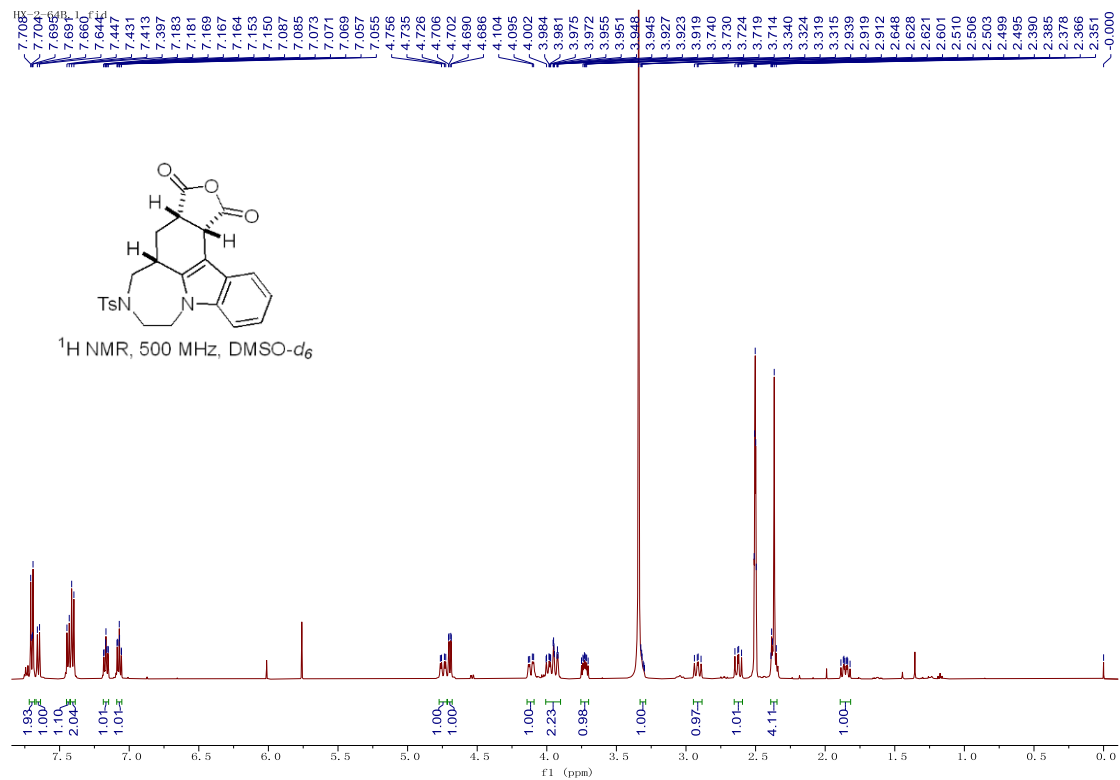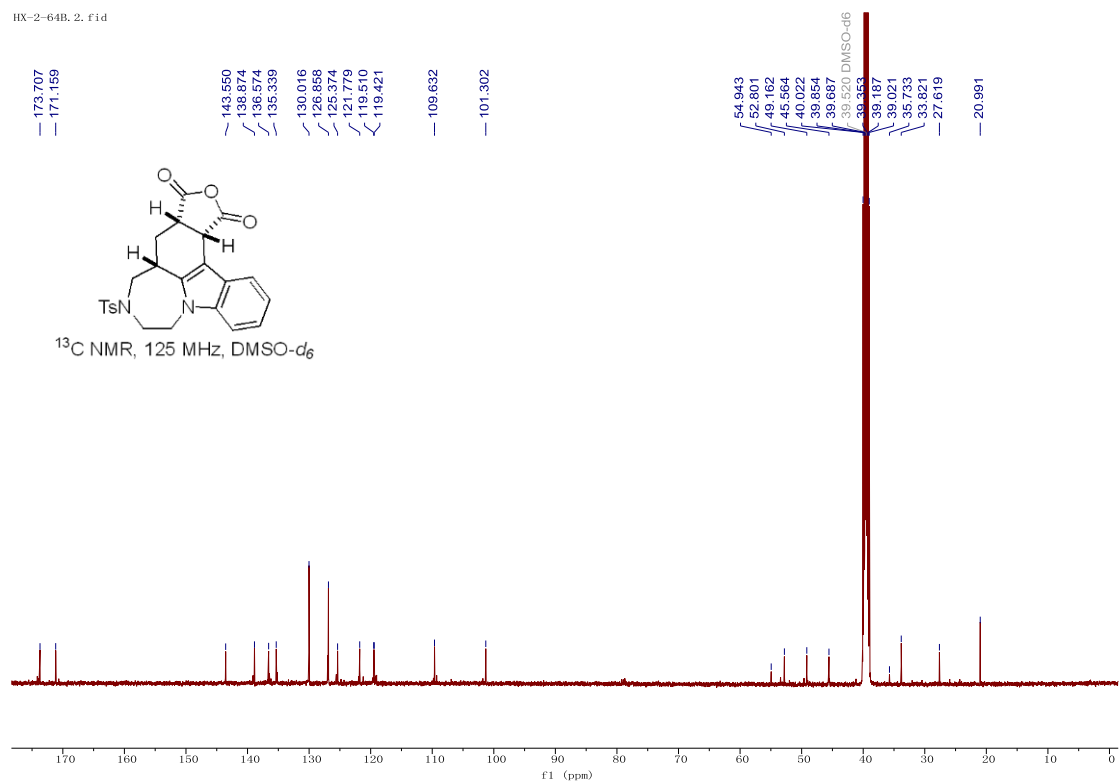

**6-tosyl-3a,4,4a,5,6,7,8,13c-octahydro-1*H*-[1,4]diazepino[1,7,6-*lm*]pyrrolo[3,4-*c*]carbazole-1,3(2*H*)-dione (**5b**)**

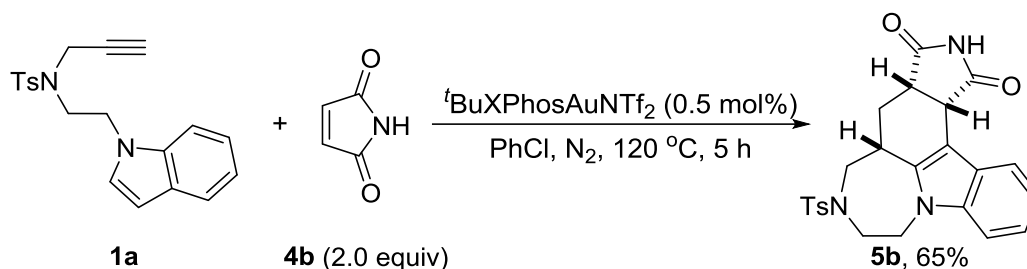

The compound **5b** (yellow solid, 29.2 mg, 65% yield) was obtained following General Procedure B from **1a** (35.2 mg, 0.1 mmol, 1.0 equiv) and **4b** (19.4 mg, 0.2 mmol, 2.0 equiv) using [*t*BuXPhosAuNTf<sub>2</sub>] (0.45 mg, 0.5 mol%) after purification by flash column chromatography using petroleum ether/DCM/THF = 8/4/1 (*R<sub>f</sub>* = 0.23) as eluent.

**<sup>1</sup>H NMR** (500 MHz, DMSO-*d*<sub>6</sub>, TMS)  $\delta$  11.09 (s, 1H), 7.75 (d, *J* = 7.5 Hz, 1H), 7.70 (dt, *J* = 8.0, 1.5 Hz, 2H), 7.40-7.37 (m, 3H), 7.14-7.11 (m, 1H), 7.04-7.01 (m, 1H), 4.72-4.67 (m, 1H), 4.21 (dd, *J* = 8.0, 2.0 Hz, 1H), 4.13-4.08 (m, 1H), 3.99-3.90 (m, 2H), 3.26-3.21 (m, 2H), 2.91-2.85 (m, 1H), 2.57 (dd, *J* = 14.0, 10.5 Hz, 1H), 2.36 (s, 3H), 2.27 (dt, *J* = 13.5, 5.5 Hz, 1H), 1.68-1.62 (m, 1H).

**<sup>13</sup>C NMR** (125 MHz, DMSO-*d*<sub>6</sub>)  $\delta$  180.4, 177.9, 143.5, 138.6, 136.5, 135.4, 130.0, 126.9, 126.1, 121.4, 120.4, 119.1, 109.3, 103.8, 53.1, 49.2, 45.3, 40.6, 40.4, 33.9, 28.6, 21.0.

**IR** (KBr)  $\nu$  (cm<sup>-1</sup>): 1717, 1632, 1597, 1465, 1384, 1261, 1184, 1161, 726, 548 cm<sup>-1</sup>.

**HRMS** (ESI): calcd for C<sub>24</sub>H<sub>23</sub>N<sub>3</sub>NaO<sub>4</sub>S [M+Na]<sup>+</sup>: 472.13015, found: 472.13046.

**MP**: 207-209 °C.



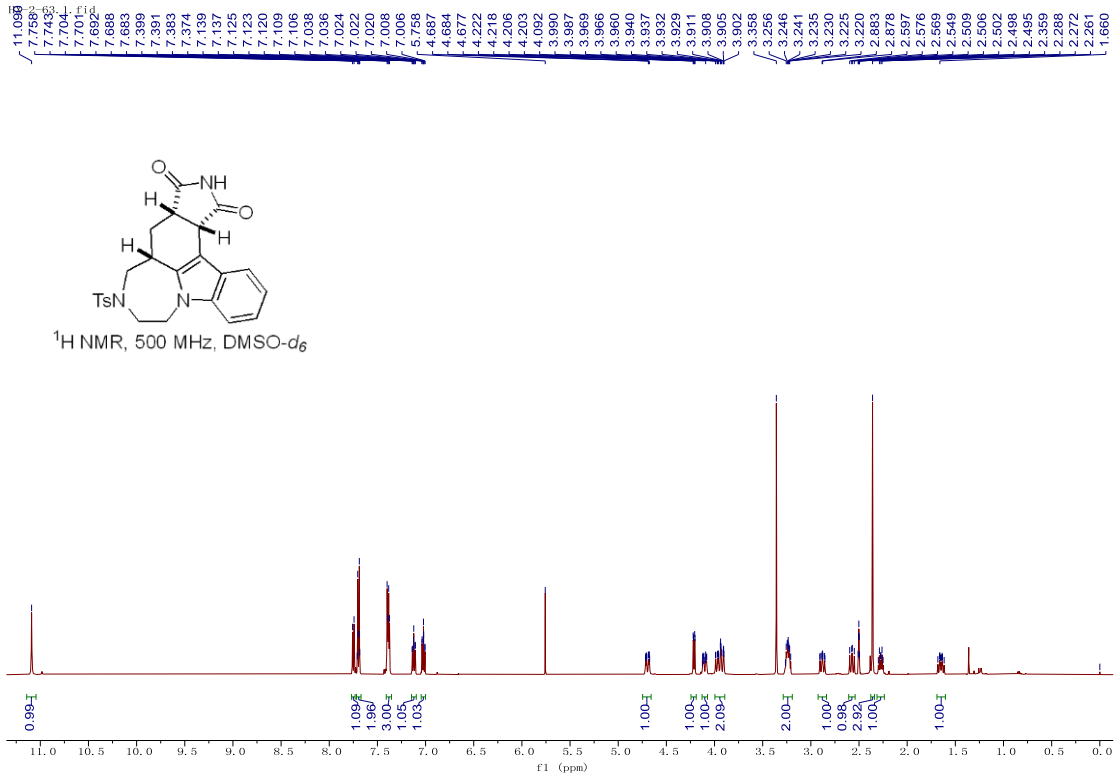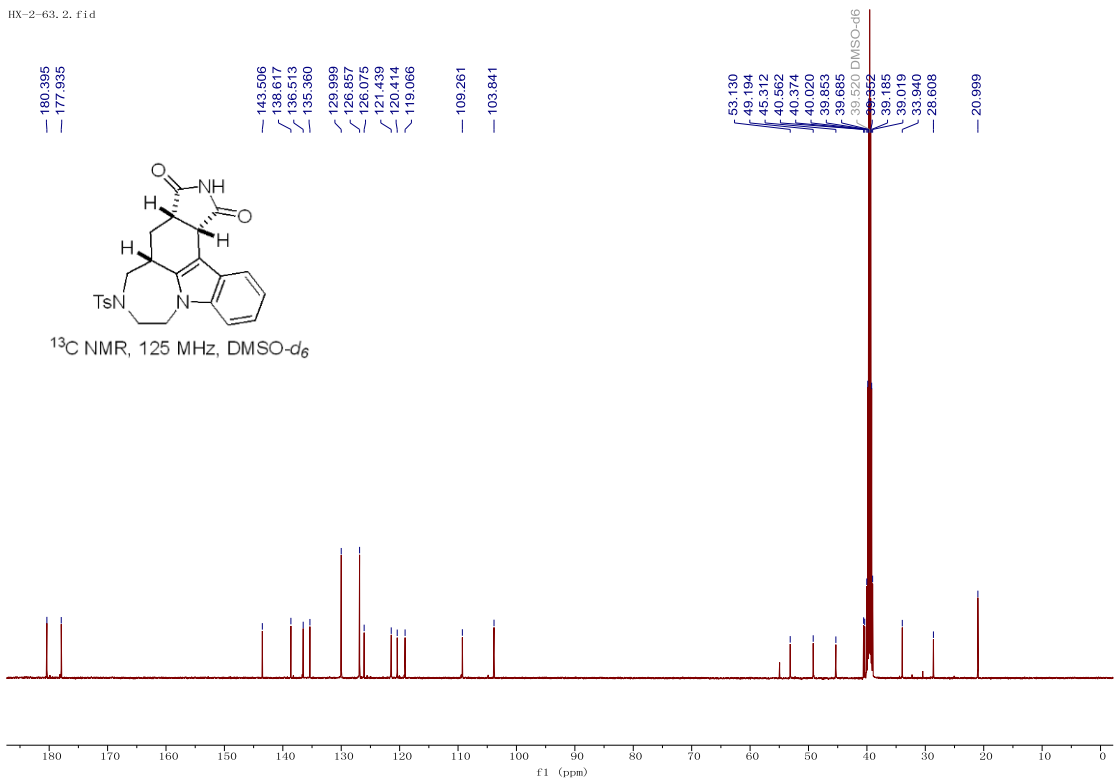

**2-ethyl-6-tosyl-3a,4,4a,5,6,7,8,13c-octahydro-1H-[1,4]diazpino[1,7,6-*lm*]pyrrolo[3,4-*c*]carbazole-1,3(2H)-dione (5c)**

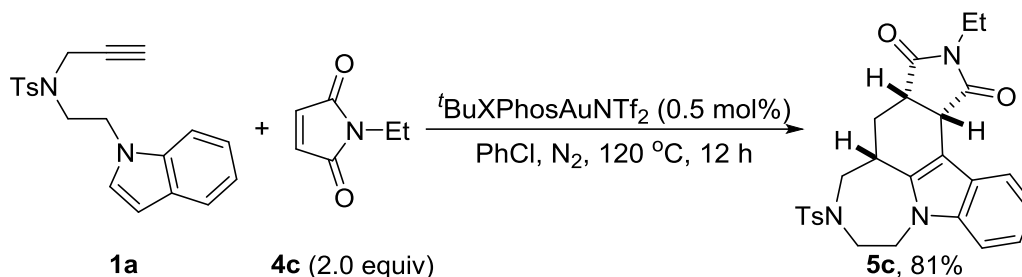

The compound **5c** (white solid, 38.7 mg, 81% yield) was obtained following General Procedure B from **1a** (35.2 mg, 0.1 mmol, 1.0 equiv) and **4c** (25.0 mg, 0.2 mmol, 2.0 equiv) using [*t*BuXPhosAuNTf<sub>2</sub>] (0.45 mg, 0.5 mol%) after purification by flash column chromatography using petroleum ether/DCM/THF = 8/4/1 (*R<sub>f</sub>* = 0.16) as eluent.

**<sup>1</sup>H NMR** (500 MHz, CDCl<sub>3</sub>, TMS)  $\delta$  7.96 (d, *J* = 8.0 Hz, 1H), 7.66 (dt, *J* = 8.0, 1.5 Hz, 2H), 7.30 (d, *J* = 8.5 Hz, 2H), 7.22-7.19 (m, 2H), 7.16-7.13 (m, 1H), 4.53-4.50 (m, 1H), 4.30-4.25 (m, 1H), 4.14 (dd, *J* = 7.5, 1.5 Hz, 1H), 4.12-4.04 (m, 2H), 3.51 (q, *J* = 7.0 Hz, 2H), 3.37-3.31 (m, 1H), 3.24-3.19 (m, 1H), 2.76 (dd, *J* = 14.0, 10.0 Hz, 1H), 2.46 (dt, *J* = 14.0, 5.5 Hz, 1H), 2.42-2.39 (m, 4H), 1.73-1.66 (m, 1H), 1.10 (t, *J* = 7.0 Hz, 3H).

**<sup>13</sup>C NMR** (125 MHz, CDCl<sub>3</sub>)  $\delta$  178.7, 176.3, 144.0, 138.5, 137.0, 135.4, 130.0, 127.1, 126.4, 122.5, 120.8, 120.3, 108.8, 104.0, 54.3, 49.9, 46.4, 39.81, 39.78, 34.9, 33.7, 29.2, 21.6, 13.0.

**IR** (KBr)  $\nu$  (cm<sup>-1</sup>): 1699, 1464, 1401, 1378, 1327, 1221, 1163, 1103, 733, 549 cm<sup>-1</sup>.

**HRMS** (ESI): calcd for C<sub>26</sub>H<sub>27</sub>N<sub>3</sub>NaO<sub>4</sub>S [M+Na]<sup>+</sup>: 500.16145, found: 500.16183.

**MP**: 169-172 °C.

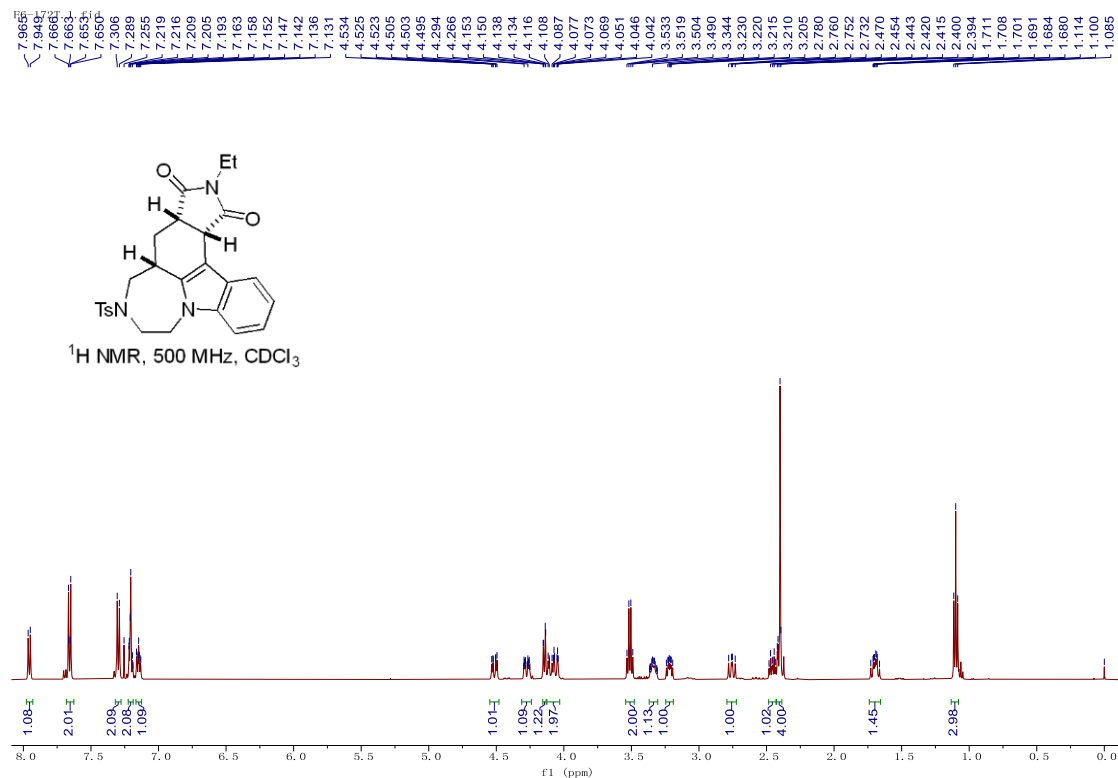

F6-172T. 2. f1d

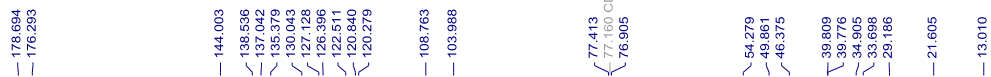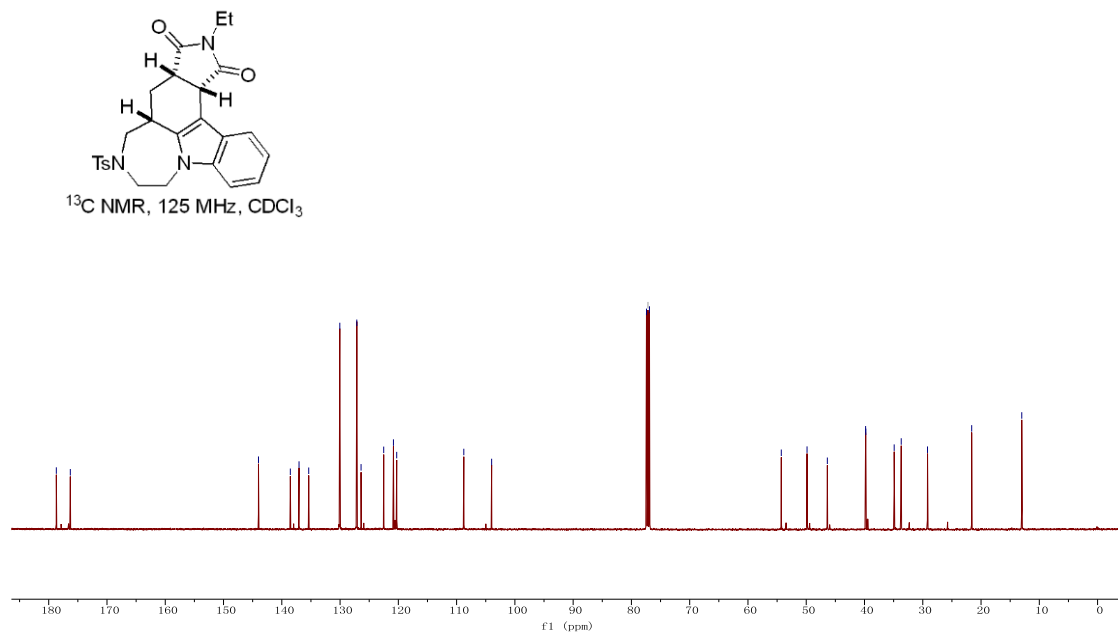

**2-cyclohexyl-6-tosyl-3a,4,4a,5,6,7,8,13c-octahydro-1H-[1,4]diazepino[1,7,6-*lm*]pyrrolo[3,4-*c*]carbazole-1,3(2H)-dione (5d)**

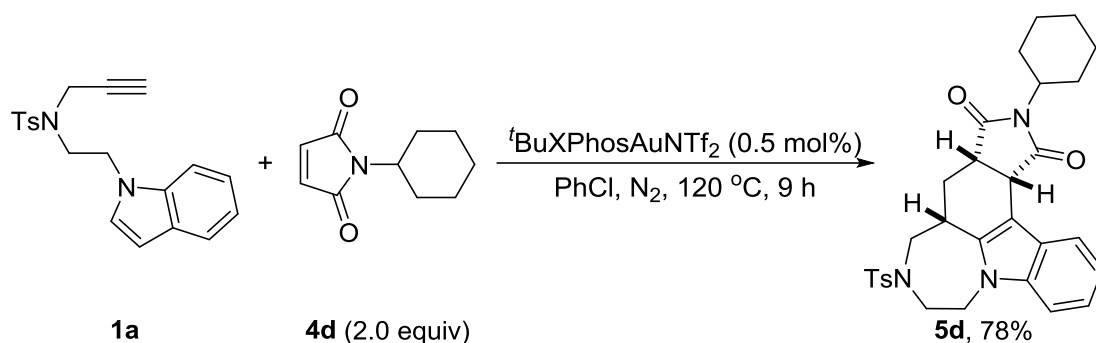

The compound **5d** (yellow solid, 41.5 mg, 78% yield) was obtained following General Procedure B from **1a** (35.2 mg, 0.1 mmol, 1.0 equiv) and **4d** (35.8 mg, 0.2 mmol, 2.0 equiv) using [<sup>t</sup>BuXPhosAuNTf<sub>2</sub>] (0.45 mg, 0.5 mol%) after purification by flash column chromatography using petroleum ether/DCM/THF = 8/4/1 (*R<sub>f</sub>* = 0.22) as eluent. <sup>1</sup>H NMR (500 MHz, CDCl<sub>3</sub>, TMS) δ 7.94 (dt, *J* = 8.0, 1.0 Hz, 1H), 7.66 (dt, *J* = 8.0, 1.5 Hz, 2H), 7.30 (d, *J* = 8.0 Hz, 2H), 7.24-7.19 (m, 2H), 7.16-7.13 (m, 1H), 4.52 (ddd, *J* = 14.5, 5.0, 1.0 Hz, 1H), 4.30-4.26 (m, 1H), 4.15-4.10 (m, 2H), 4.07 (dt, *J* = 13.0, 2.5 Hz, 1H), 3.91 (tt, *J* = 12.5, 4.0 Hz, 1H), 3.37-3.31 (m, 1H), 3.19-3.15 (m, 1H), 2.75-2.70 (m, 1H), 2.44 (dt, *J* = 13.5, 5.5 Hz, 1H), 2.41-2.35 (m, 4H), 2.13-2.02 (m, 2H), 1.80-1.76 (m, 2H), 1.70-1.66 (m, 1H), 1.53-1.44 (m, 2H), 1.31-1.13 (m, 4H). <sup>13</sup>C NMR (125 MHz, CDCl<sub>3</sub>) δ 179.0, 176.7, 144.0, 138.6, 137.1, 135.3, 130.0, 127.2, 126.5, 122.5, 120.9, 120.3, 108.8, 104.2, 54.4, 51.6, 50.0, 46.4, 39.58, 39.56, 34.9, 29.4, 29.1, 28.6, 25.93, 25.89, 25.1, 21.6. IR (KBr) ν (cm<sup>-1</sup>): 1707, 1597, 1463, 1374, 1343, 1184, 1159, 747, 548 cm<sup>-1</sup>. HRMS (ESI): calcd for C<sub>30</sub>H<sub>33</sub>N<sub>3</sub>NaO<sub>4</sub>S [M+Na]<sup>+</sup>: 554.20840, found: 554.20880. MP: 202-205 °C.

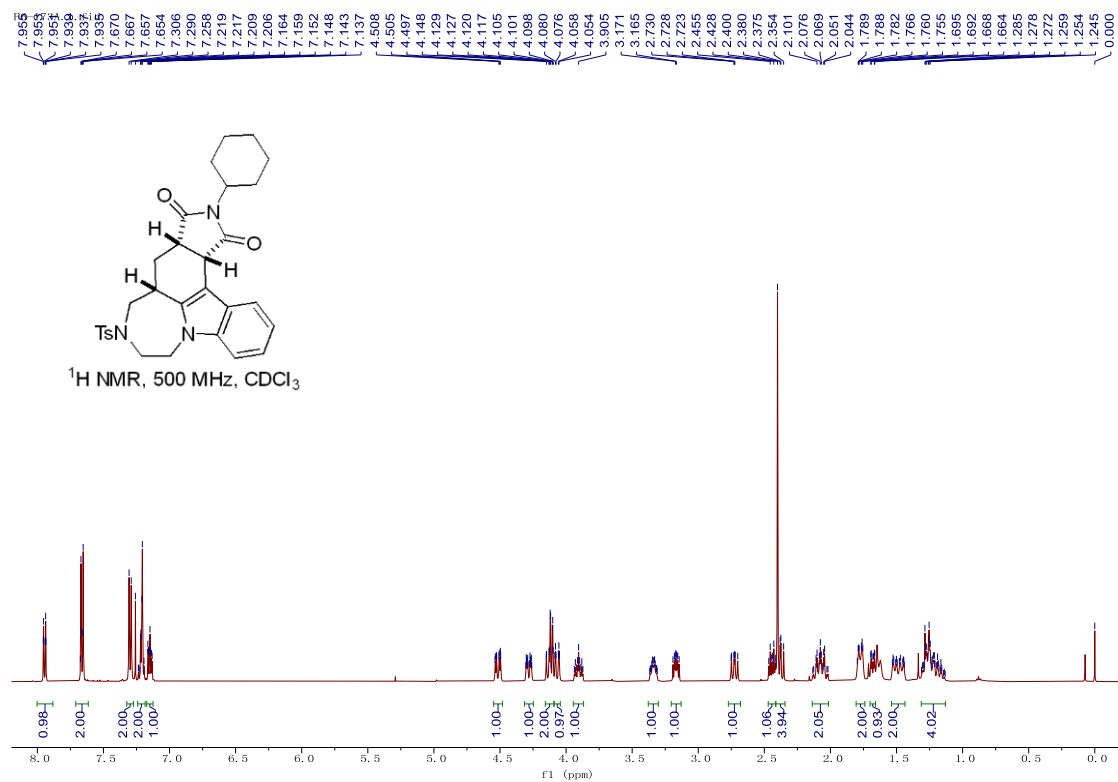

F6-173A. 2. f1.d

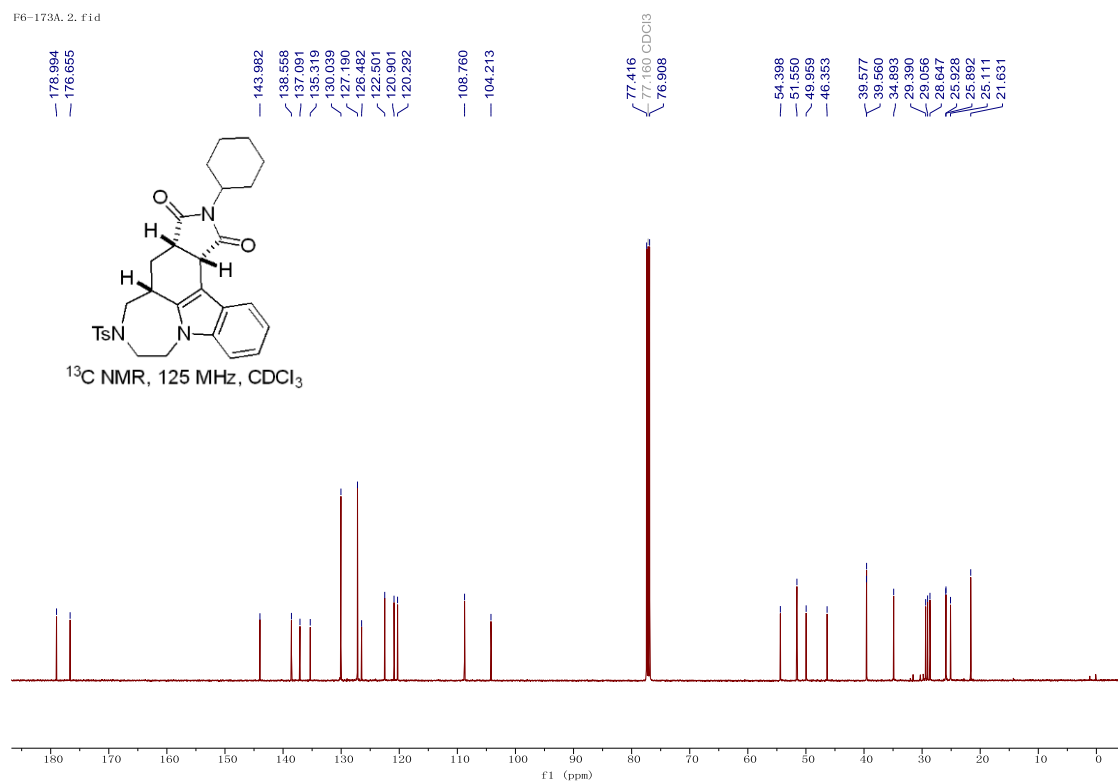

**methyl 1,3-dioxo-6-tosyl-1,3,3a,4,4a,5,6,7,8,13c-decahydro-2H-[1,4]diazepino[1,7,6-*lm*]pyrrolo[3,4-*c*]carbazole-2-carboxylate (5e)**

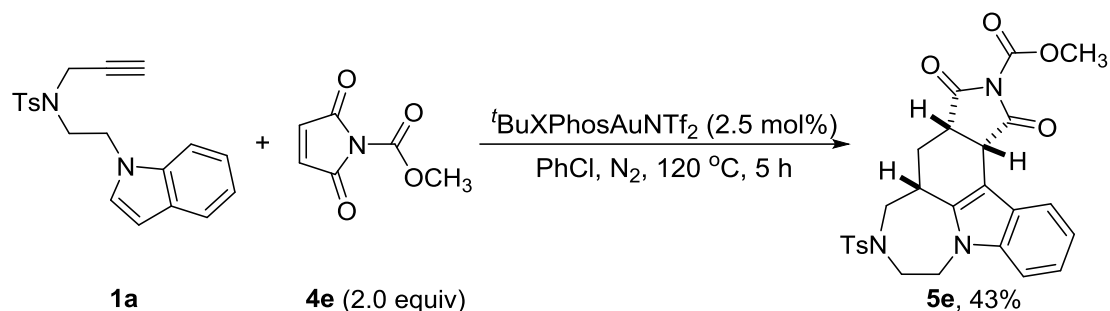

The compound **5e** (yellow solid, 21.8 mg, 43% yield) was obtained following General Procedure B from **1a** (35.2 mg, 0.1 mmol, 1.0 equiv) and **4e** (31.0 mg, 0.2 mmol, 2.0 equiv) using [*t*BuXPhosAuNTf<sub>2</sub>] (2.25 mg, 2.5 mol%) after purification by flash column chromatography using petroleum ether/DCM/THF = 8/4/1 (*R<sub>f</sub>* = 0.22) as eluent.

**<sup>1</sup>H NMR** (500 MHz, CDCl<sub>3</sub>, TMS)  $\delta$  7.86 (d, *J* = 8.0 Hz, 1H), 7.66 (dt, *J* = 8.5, 1.5 Hz, 2H), 7.30 (d, *J* = 8.0 Hz, 2H), 7.23-7.21 (m, 2H), 7.16-7.13 (m, 1H), 4.54 (dd, *J* = 14.5, 4.5 Hz, 1H), 4.31-4.27 (m, 2H), 4.14-4.07 (m, 2H), 3.93 (s, 3H), 3.41-3.31 (m, 2H), 2.76 (dd, *J* = 14.0, 10.5 Hz, 1H), 2.49-2.41 (m, 5H), 2.00-1.93 (m, 1H).

**<sup>13</sup>C NMR** (125 MHz, CDCl<sub>3</sub>)  $\delta$  174.3, 171.6, 148.9, 144.1, 138.5, 136.9, 135.5, 130.1, 127.1, 126.1, 122.7, 120.6, 120.5, 108.8, 102.5, 54.9, 54.3, 49.8, 46.5, 40.5, 34.9, 28.0, 21.6.

**IR** (KBr)  $\nu$  (cm<sup>-1</sup>): 1772, 1650, 1598, 1464, 1385, 1322, 1252, 1161, 746, 547 cm<sup>-1</sup>.

**HRMS** (ESI): calcd for C<sub>26</sub>H<sub>26</sub>N<sub>3</sub>O<sub>6</sub>S [M+H]<sup>+</sup>: 508.15368, found: 508.15433.

**MP**: 130-133 °C.

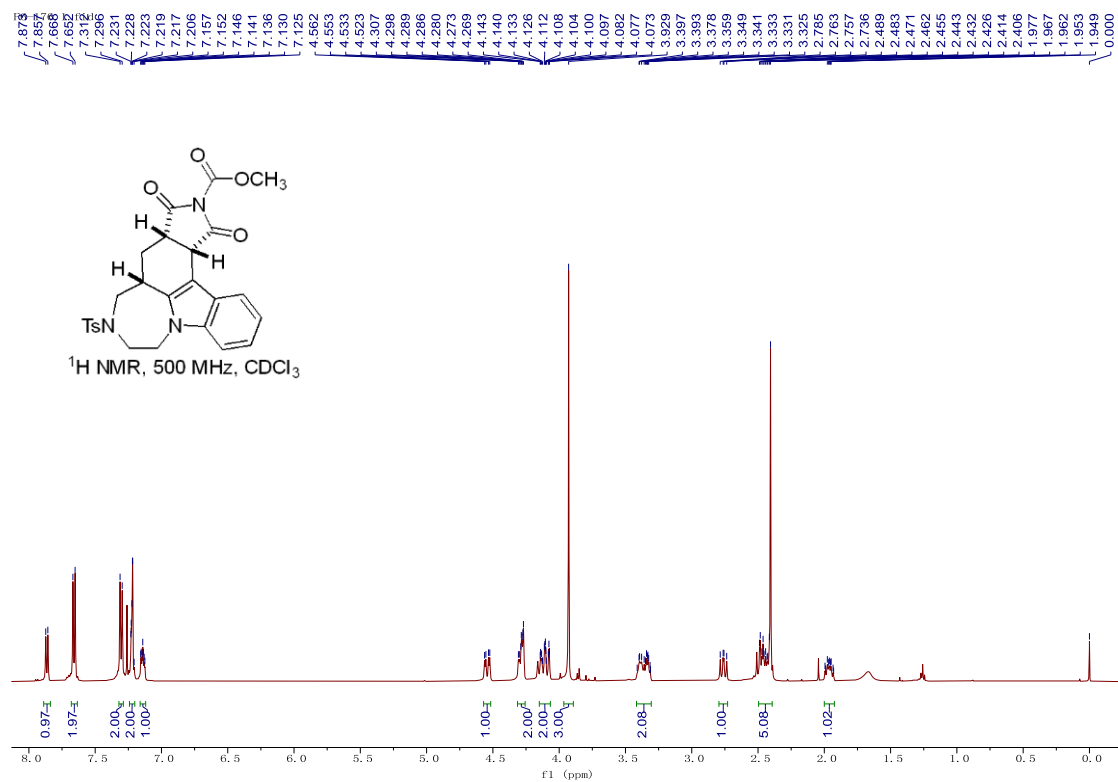

F6-176.2.f1d

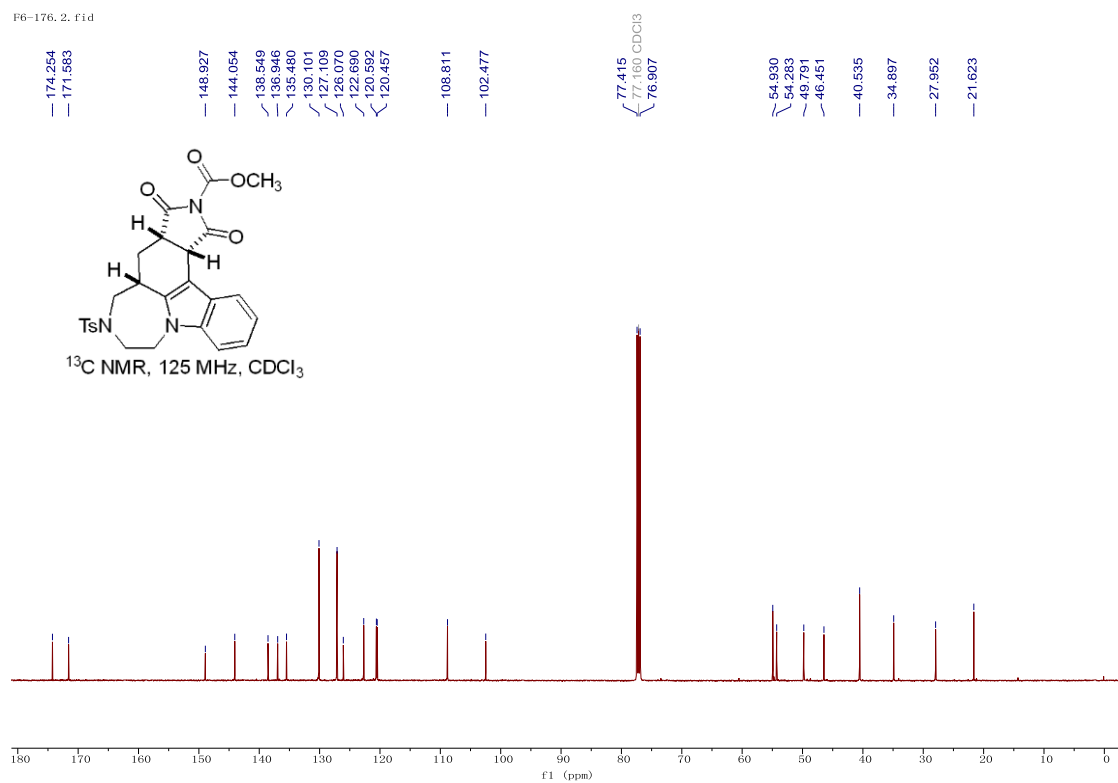

**2-benzyl-6-tosyl-3a,4,4a,5,6,7,8,13c-octahydro-1H-[1,4]diazepino[1,7,6-*lm*]pyrrolo[3,4-*c*]carbazole-1,3(2H)-dione (5f)**

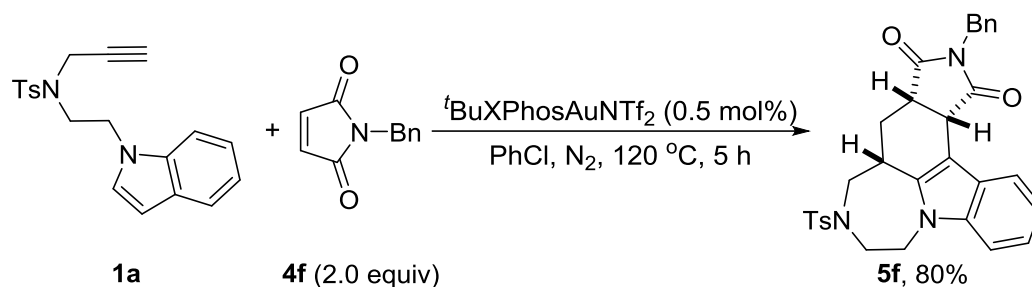

The compound **5f** (yellow solid, 44.7 mg, 80% yield) was obtained following General Procedure B from **1a** (35.2 mg, 0.1 mmol, 1.0 equiv) and **4f** (37.4 mg, 0.2 mmol, 2.0 equiv) using [*t*BuXPhosAuNTf<sub>2</sub>] (0.45 mg, 0.5 mol%) after purification by flash column chromatography using petroleum ether/DCM/THF = 8/4/1 (*R<sub>f</sub>* = 0.20) as eluent.

**<sup>1</sup>H NMR** (500 MHz, CDCl<sub>3</sub>, TMS) δ 7.95 (dt, *J* = 8.0, 1.5 Hz, 1H), 7.65 (dt, *J* = 8.0, 2.0 Hz, 2H), 7.30-7.26 (m, 4H), 7.23-7.18 (m, 5H), 7.16-7.13 (m, 1H), 4.61 (d, *J* = 14.0 Hz, 1H), 4.57 (d, *J* = 14.0 Hz, 1H), 4.49 (ddd, *J* = 14.5, 5.0, 1.0 Hz, 1H), 4.27-4.23 (m, 1H), 4.16 (dd, *J* = 7.5, 1.5 Hz, 1H), 4.09 (ddd, *J* = 15.0, 10.5, 1.5 Hz, 1H), 4.01 (dt, *J* = 13.0, 2.0 Hz, 1H), 3.34-3.28 (m, 1H), 3.25-3.21 (m, 1H), 2.72 (ddd, *J* = 14.5, 10.5, 1.5 Hz, 1H), 2.44-2.39 (m, 4H), 2.34 (dd, *J* = 13.5, 10.5 Hz, 1H), 1.69-1.64 (m, 1H).

**<sup>13</sup>C NMR** (125 MHz, CDCl<sub>3</sub>) δ 178.4, 176.1, 144.0, 138.6, 137.0, 135.9, 135.6, 130.1, 128.8, 128.7, 127.9, 127.1, 126.3, 122.5, 120.9, 120.3, 108.8, 103.9, 54.2, 49.8, 46.5, 42.4, 39.93, 39.86, 35.0, 29.0, 21.6.

**IR** (KBr)  $\nu$  (cm<sup>-1</sup>): 1703, 1465, 1429, 1394, 1325, 1159, 1105, 1009, 735 cm<sup>-1</sup>.

**HRMS** (ESI): calcd for C<sub>31</sub>H<sub>30</sub>N<sub>3</sub>O<sub>4</sub>S [M+H]<sup>+</sup>: 540.19515, found: 540.19543.

**MP**: 202-205 °C.



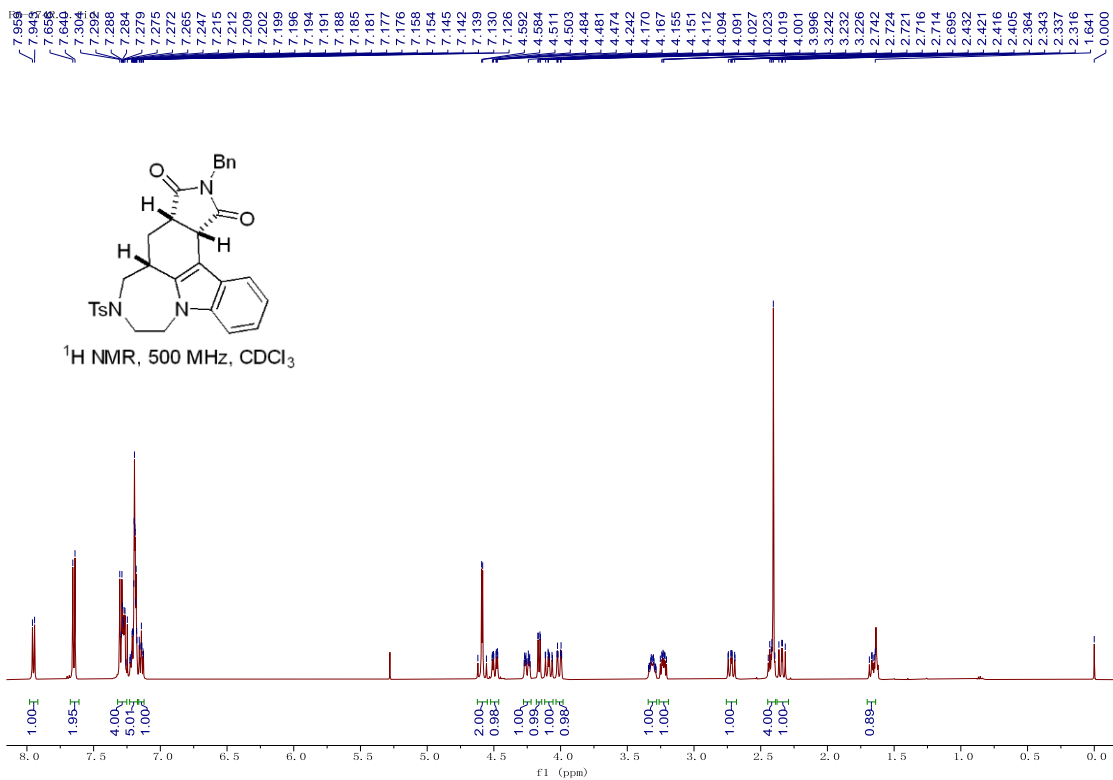

F6-174R. 2. f1d

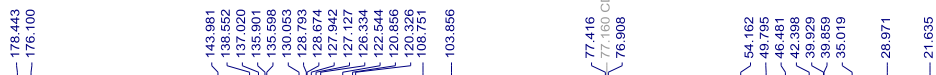

**2-phenyl-6-tosyl-3a,4,4a,5,6,7,8,13c-octahydro-1H-[1,4]diazepino[1,7,6-*lm*]pyrrolo[3,4-*c*]carbazole-1,3(2H)-dione (5g)**

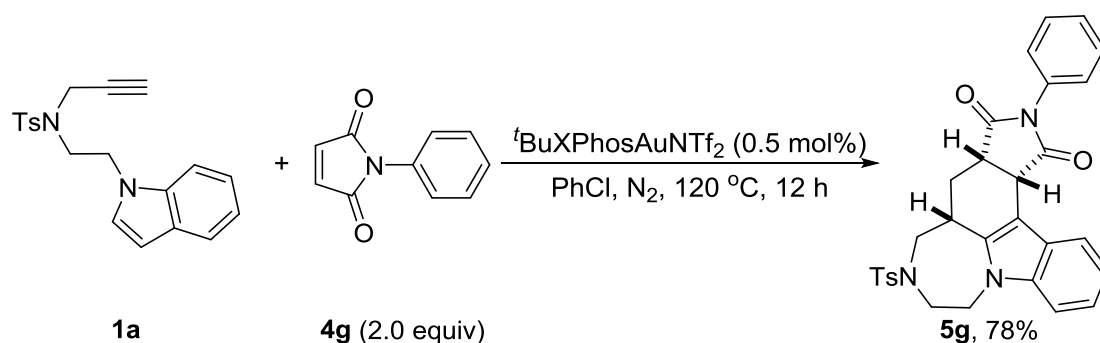

The compound **5g** (yellow solid, 41.0 mg, 78% yield) was obtained following General Procedure B from **1a** (35.2 mg, 0.1 mmol, 1.0 equiv) and **4g** (34.6 mg, 0.2 mmol, 2.0 equiv) using [*t*BuXPhosAuNTf<sub>2</sub>] (0.45 mg, 0.5 mol%) after purification by flash column chromatography using petroleum ether/DCM/THF = 8/4/1 (*R<sub>f</sub>* = 0.34) as eluent.

**<sup>1</sup>H NMR** (500 MHz, CDCl<sub>3</sub>, TMS) δ 7.96 (dt, *J* = 8.0, 1.5 Hz, 1H), 7.66 (dt, *J* = 8.5, 1.5 Hz, 2H), 7.43-7.40 (m, 2H), 7.35 (tt, *J* = 7.5, 1.0 Hz, 1H), 7.29 (d, *J* = 8.5 Hz, 2H), 7.24-7.21 (m, 4H), 7.16-7.12 (m, 1H), 4.54 (dd, *J* = 15.0, 5.0 Hz, 1H), 4.36 (dt, *J* = 8.0, 1.5 Hz, 1H), 4.29 (dd, *J* = 14.0, 4.5 Hz, 1H), 4.18-4.10 (m, 2H), 3.43-3.38 (m, 2H), 2.76 (dd, *J* = 14.0, 10.5 Hz, 1H), 2.56-2.51 (m, 1H), 2.48 (dd, *J* = 13.0, 10.5 Hz, 1H), 2.40 (s, 3H), 1.98-1.92 (m, 1H).

**<sup>13</sup>C NMR** (125 MHz, CDCl<sub>3</sub>) δ 177.8, 175.3, 144.0, 138.6, 137.1, 135.4, 131.9, 130.1, 129.1, 128.5, 127.2, 126.4, 126.3, 122.6, 120.9, 120.4, 108.8, 103.7, 54.5, 49.9, 46.4, 40.1, 40.0, 34.9, 29.0, 21.7.

**IR** (KBr)  $\nu$ (cm<sup>-1</sup>): 1715, 1498, 1464, 1378, 1325, 1160, 1102, 1020, 734 cm<sup>-1</sup>.

**HRMS** (ESI): calcd for C<sub>30</sub>H<sub>27</sub>N<sub>3</sub>NaO<sub>4</sub>S [M+Na]<sup>+</sup>: 548.16145, found: 548.16187.

**MP**: 141-145 °C.

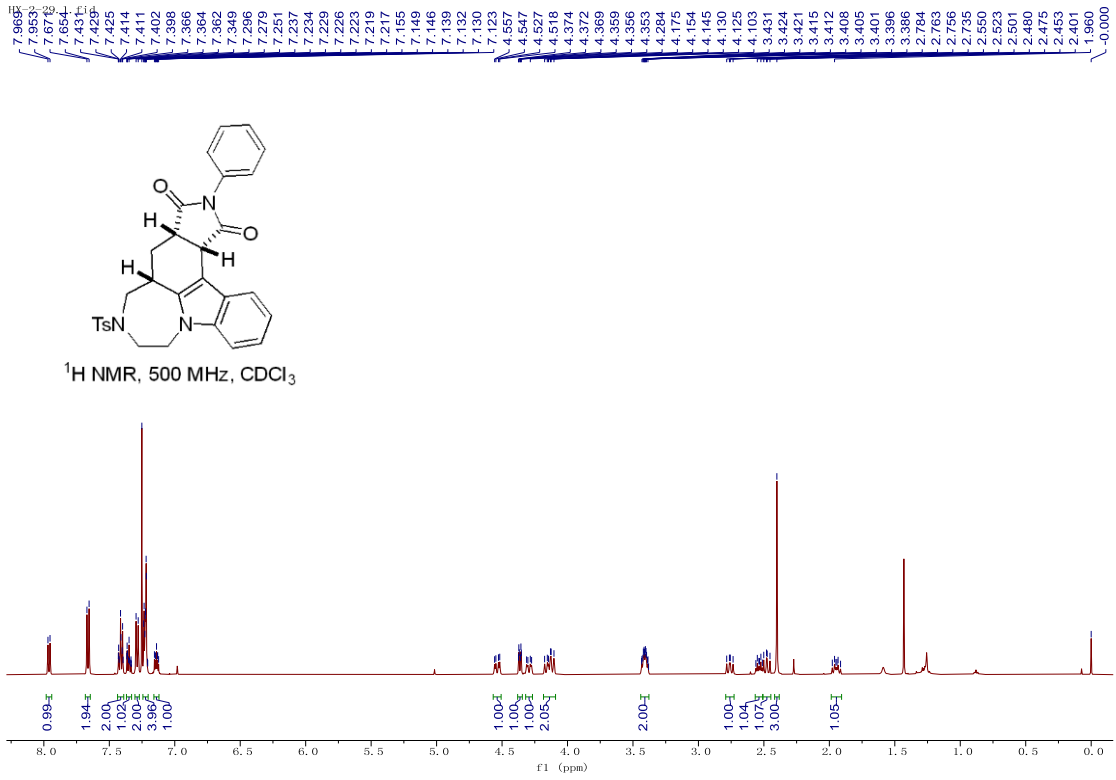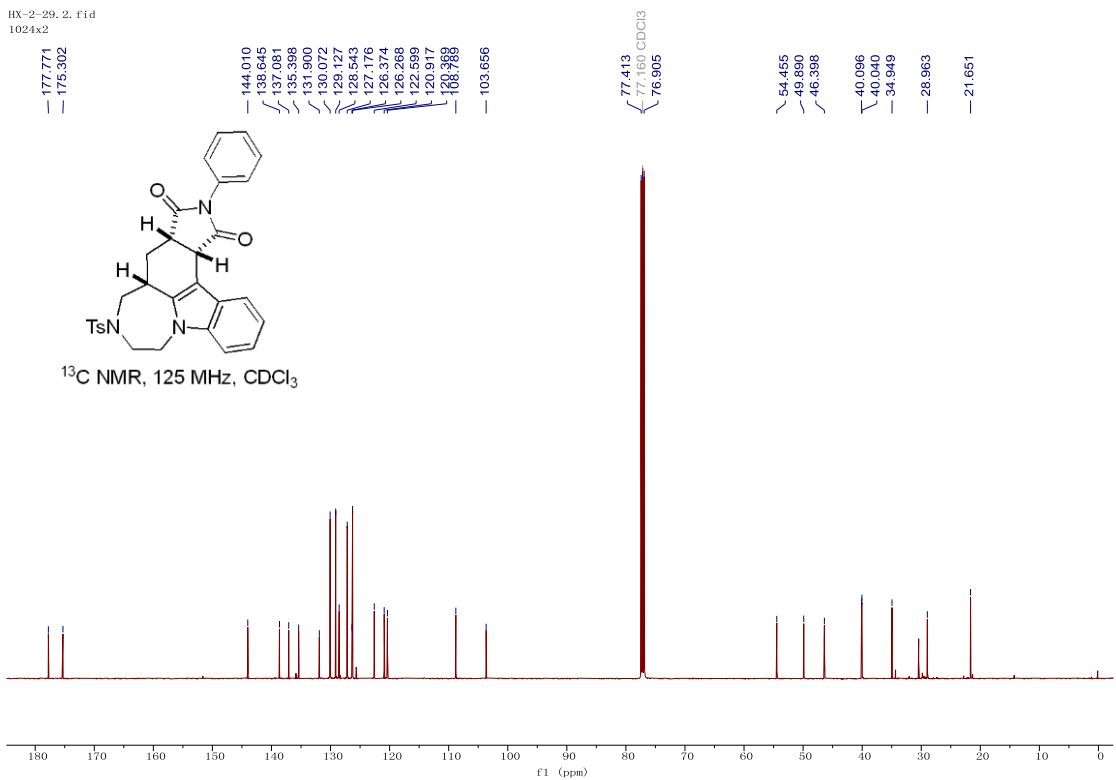

**2-(4-methoxyphenyl)-6-tosyl-3a,4,4a,5,6,7,8,13c-octahydro-1H-[1,4]diazepino[1,7,6-*lm*]pyrrolo[3,4-*c*]carbazole-1,3(2H)-dione (5h)**

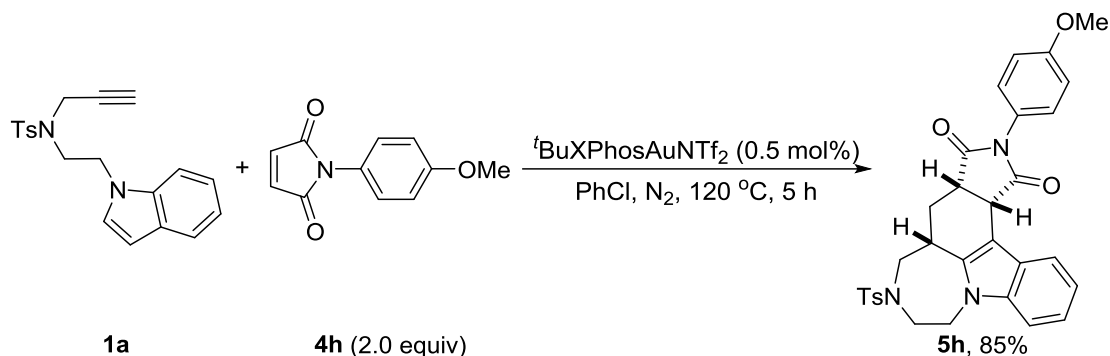

The compound **5h** (yellow solid, 47.2 mg, 85% yield) was obtained following General Procedure B from **1a** (35.2 mg, 0.1 mmol, 1.0 equiv) and **4h** (40.6 mg, 0.2 mmol, 2.0 equiv) using [*t*BuXPhosAuNTf<sub>2</sub>] (0.45 mg, 0.5 mol%) after purification by flash column chromatography using petroleum ether/DCM/THF = 10/4/1 (*R<sub>f</sub>* = 0.12) as eluent.

<sup>1</sup>H NMR (500 MHz, CDCl<sub>3</sub>, TMS) δ 7.96 (dt, *J* = 8.0, 1.0 Hz, 1H), 7.66 (dt, *J* = 8.5, 2.0 Hz, 2H), 7.29 (d, *J* = 8.0 Hz, 2H), 7.22-7.20 (m, 2H), 7.15-7.11 (m, 3H), 6.91 (dt, *J* = 9.0, 2.0 Hz, 2H), 4.53 (dd, *J* = 14.5, 5.0 Hz, 1H), 4.33 (d, *J* = 7.5 Hz, 1H), 4.29 (dd, *J* = 14.0, 4.5 Hz, 1H), 4.16-4.09 (m, 2H), 3.79 (s, 3H), 3.41-3.36 (m, 2H), 2.77 (dd, *J* = 14.0, 10.5 Hz, 1H), 2.55-2.45 (m, 2H), 2.40 (s, 3H), 1.94-1.87 (m, 1H).

<sup>13</sup>C NMR (125 MHz, CDCl<sub>3</sub>) δ 178.1, 175.6, 159.4, 144.0, 138.6, 137.1, 135.4, 130.1, 127.5, 127.2, 126.4, 124.5, 122.6, 120.9, 120.3, 114.4, 108.8, 103.8, 55.6, 54.4, 49.9, 46.4, 40.02, 39.98, 35.0, 29.1, 21.6.

IR (KBr)  $\nu$ (cm<sup>-1</sup>): 1713, 1597, 1513, 1385, 1327, 1250, 1161, 736, 548 cm<sup>-1</sup>.

HRMS (ESI): calcd for C<sub>31</sub>H<sub>30</sub>N<sub>3</sub>O<sub>5</sub>S [M+H]<sup>+</sup>: 556.19007, found: 556.19025.

MP: 124-126 °C.

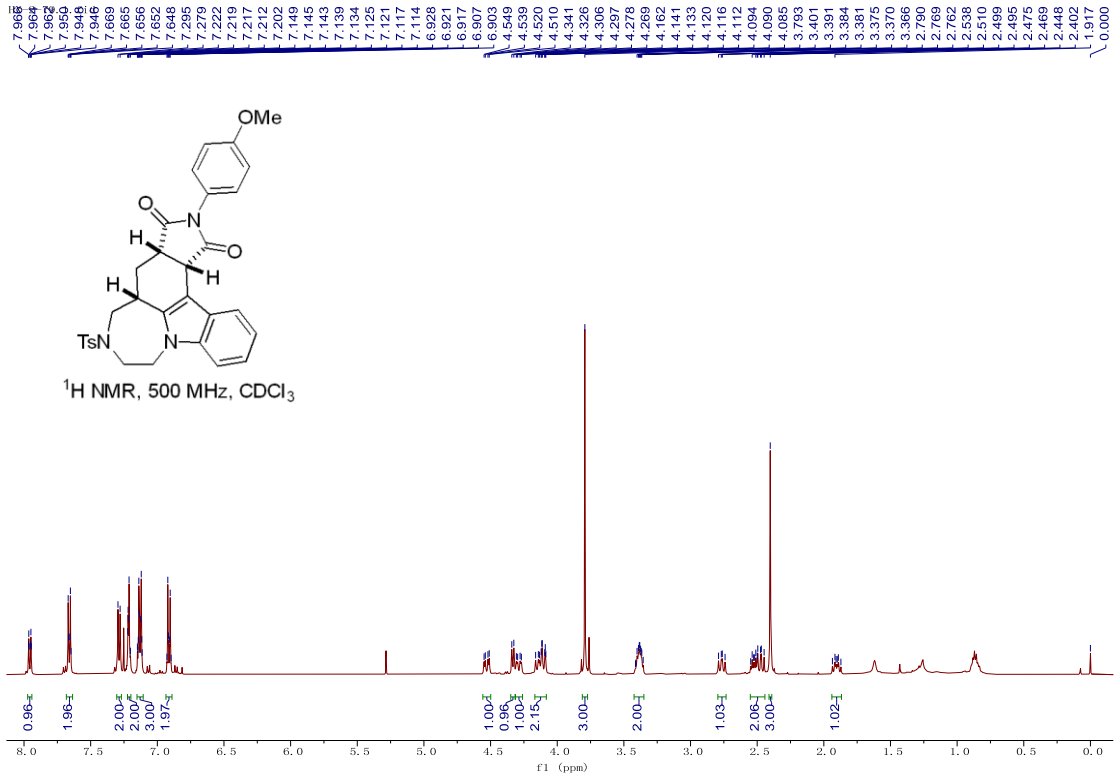

HX-2-79.2.fid

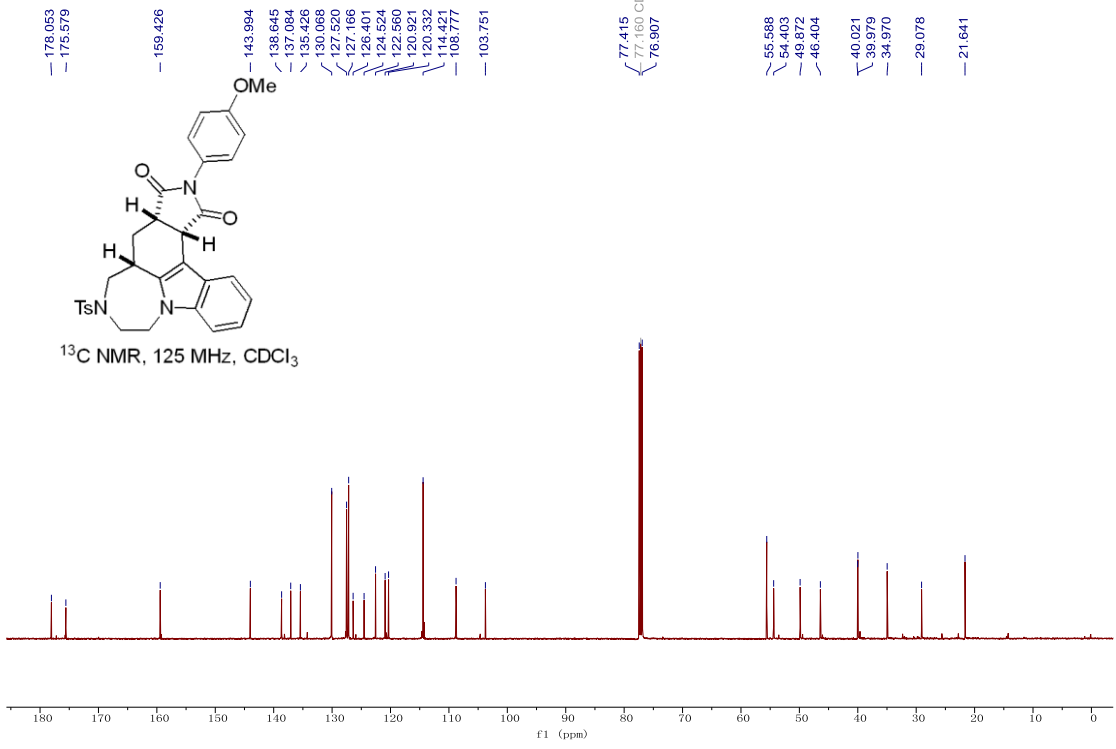

**2-(4-bromophenyl)-6-tosyl-3a,4,4a,5,6,7,8,13c-octahydro-1H-[1,4]diazepino[1,7,6-*lm*]pyrrolo[3,4-*c*]carbazole-1,3(2H)-dione (**5i**)**

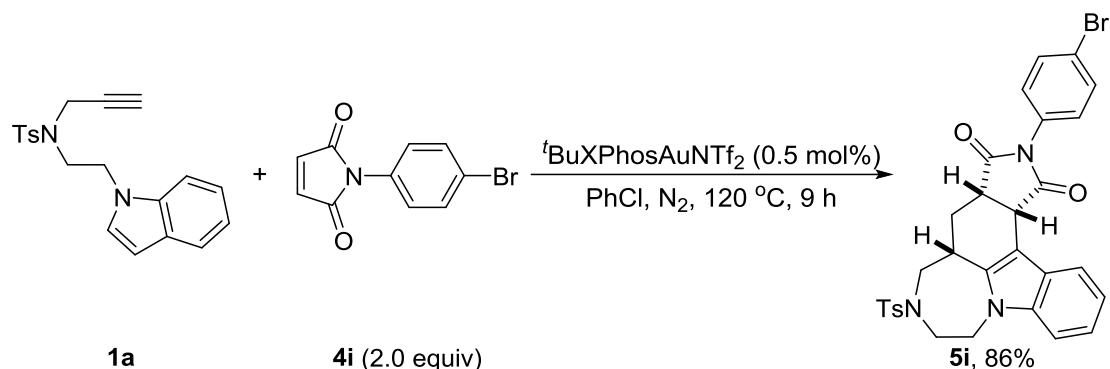

The compound **5i** (white solid, 51.9 mg, 86% yield) was obtained following General Procedure B from **1a** (35.2 mg, 0.1 mmol, 1.0 equiv) and **4i** (50.4 mg, 0.2 mmol, 2.0 equiv) using [*t*BuXPhosAuNTf<sub>2</sub>] (0.45 mg, 0.5 mol%) after purification by flash column chromatography using petroleum ether/DCM/THF = 8/4/1 (*R<sub>f</sub>* = 0.30) as eluent.

**<sup>1</sup>H NMR** (600 MHz, CDCl<sub>3</sub>, TMS)  $\delta$  7.94 (d, *J* = 7.8 Hz, 1H), 7.66 (dt, *J* = 8.4, 2.4 Hz, 2H), 7.53 (dt, *J* = 9.0, 2.4 Hz, 2H), 7.29 (d, *J* = 8.4 Hz, 2H), 7.24-7.22 (m, 2H), 7.16-7.13 (m, 3H), 4.55 (dd, *J* = 15.0, 4.8 Hz, 1H), 4.37 (dd, *J* = 7.8, 1.2 Hz, 1H), 4.30 (dd, *J* = 14.4, 4.8 Hz, 1H), 4.18-4.10 (m, 2H), 3.44-3.39 (m, 2H), 2.76 (dd, *J* = 14.4, 10.8 Hz, 1H), 2.54 (dt, *J* = 13.2, 5.4 Hz, 1H), 2.46 (dd, *J* = 13.2, 10.8 Hz, 1H), 2.41 (s, 3H), 1.96-1.90 (m, 1H).

**<sup>13</sup>C NMR** (125 MHz, CDCl<sub>3</sub>)  $\delta$  177.4, 175.0, 144.1, 138.7, 137.1, 135.4, 132.3, 130.9, 130.1, 127.7, 127.2, 126.3, 122.7, 122.3, 120.8, 120.4, 108.8, 103.4, 54.4, 49.9, 46.4, 40.1, 40.0, 34.9, 28.9, 21.7.

**IR** (KBr)  $\nu$ (cm<sup>-1</sup>): 1716, 1490, 1464, 1378, 1326, 1160, 1102, 1013, 738, 548 cm<sup>-1</sup>.

**HRMS** (ESI): calcd for C<sub>30</sub>H<sub>27</sub>BrN<sub>3</sub>O<sub>4</sub>S [M+H]<sup>+</sup>: 604.09002, found: 604.08985.

**MP**: 202-205 °C.

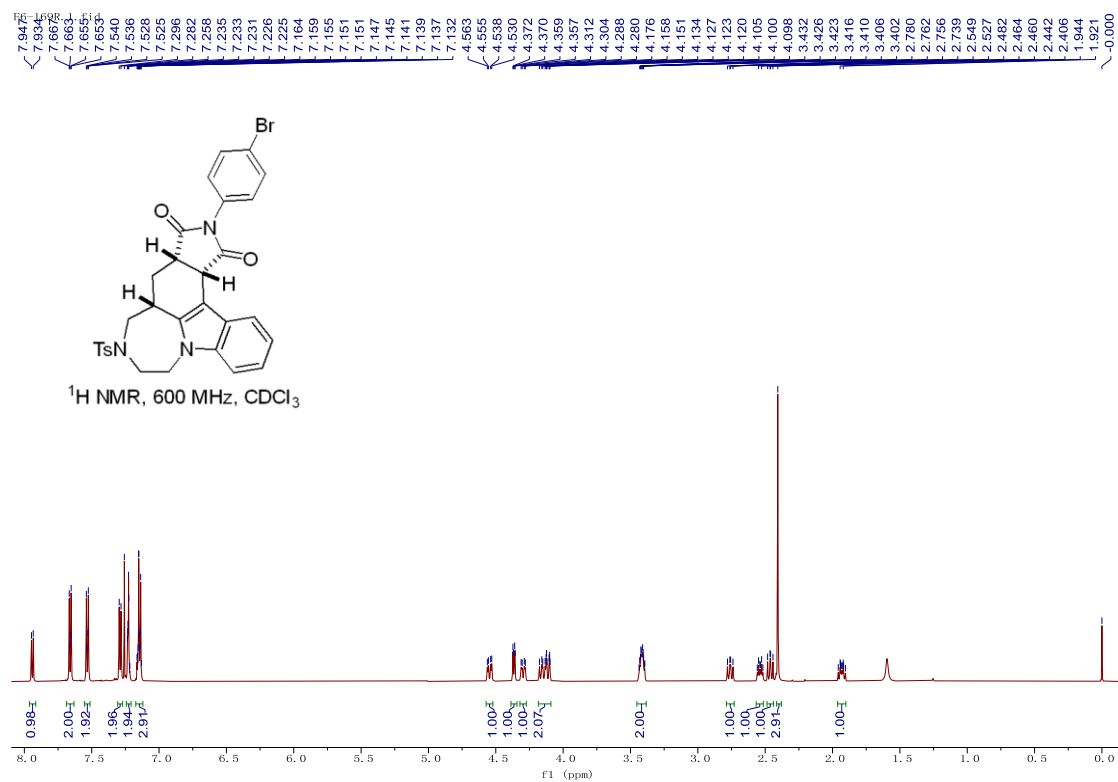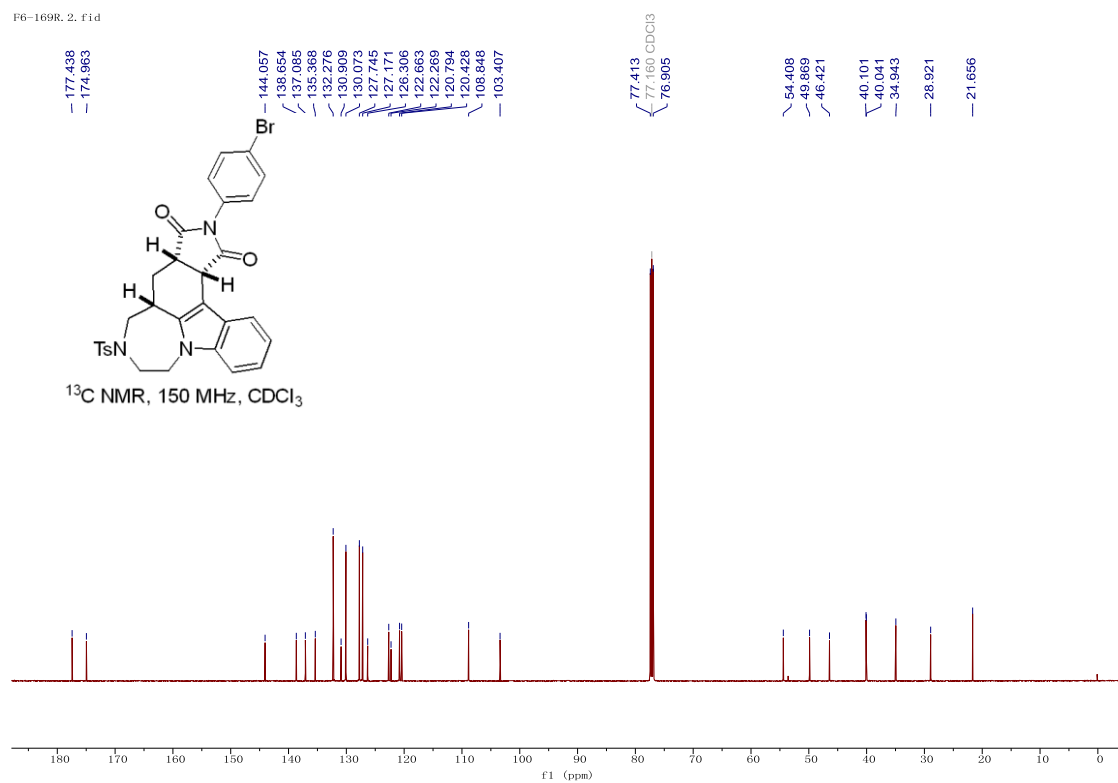

**6-tosyl-2-(2,4,6-trichlorophenyl)-3a,4,4a,5,6,7,8,13c-octahydro-1*H*-[1,4]diazepino[1,7,6-*lm*]pyrrolo[3,4-*c*]carbazole-1,3(2*H*)-dione (**5j**)**

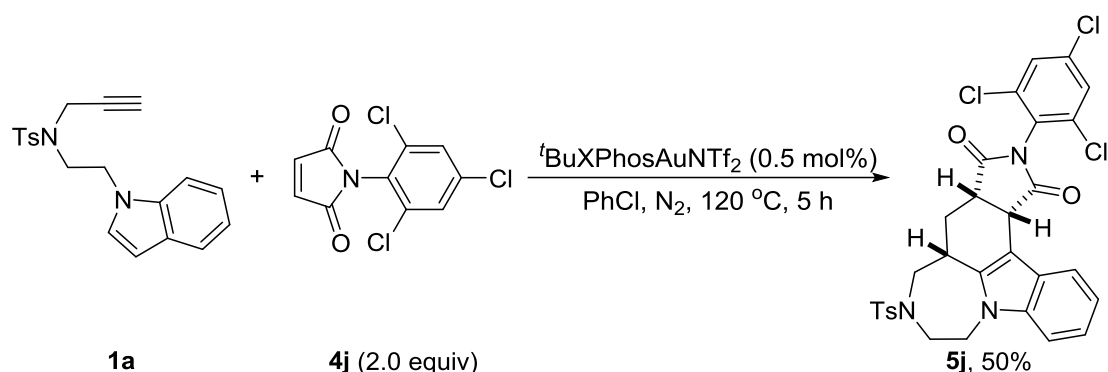

The compound **5j** (yellow solid, 31.5 mg, 50% yield) was obtained following General Procedure B from **1a** (35.2 mg, 0.1 mmol, 1.0 equiv) and **4j** (55.3 mg, 0.2 mmol, 2.0 equiv) using [*t*BuXPhosAuNTf<sub>2</sub>] (0.45 mg, 0.5 mol%) after purification by flash column chromatography using petroleum ether/DCM/THF = 10/4/1 (*R<sub>f</sub>* = 0.27) as eluent.

**<sup>1</sup>H NMR** (500 MHz, CDCl<sub>3</sub>, TMS)  $\delta$  7.92 (dt, *J* = 7.5, 1.0 Hz, 1H), 7.67 (dt, *J* = 8.5, 2.0 Hz, 2H), 7.48 (d, *J* = 2.0 Hz, 1H), 7.35 (d, *J* = 2.5 Hz, 1H), 7.30 (d, *J* = 8.0 Hz, 2H), 7.23-7.22 (m, 2H), 7.16-7.13 (m, 1H), 4.58-4.54 (m, 1H), 4.45 (dd, *J* = 7.5, 1.5 Hz, 1H), 4.34-4.30 (m, 1H), 4.16 (ddd, *J* = 15.0, 10.5, 1.5 Hz, 1H), 4.10 (dt, *J* = 13.0, 2.5 Hz, 1H), 3.52-3.48 (m, 1H), 3.47-3.41 (m, 1H), 2.78 (dd, *J* = 14.0, 10.5 Hz, 1H), 2.60-2.55 (m, 2H), 2.41 (s, 3H), 2.04-1.98 (m, 1H).

**<sup>13</sup>C NMR** (125 MHz, CDCl<sub>3</sub>)  $\delta$  175.9, 173.5, 144.0, 138.7, 137.1, 136.6, 135.5, 135.4, 135.2, 130.1, 129.0, 128.8, 127.2, 126.9, 126.3, 122.7, 120.8, 120.5, 108.8, 103.4, 54.1, 50.0, 46.7, 40.8, 40.6, 35.2, 29.2, 21.7.

**IR** (KBr)  $\nu$  (cm<sup>-1</sup>): 1720, 1631, 1598, 1468, 1384, 1325, 1165, 814, 740, 549 cm<sup>-1</sup>.

**HRMS** (ESI): calcd for C<sub>30</sub>H<sub>25</sub>Cl<sub>3</sub>N<sub>3</sub>O<sub>4</sub>S [M+H]<sup>+</sup>: 628.06259, found: 628.06293.

**MP**: 196-198 °C.



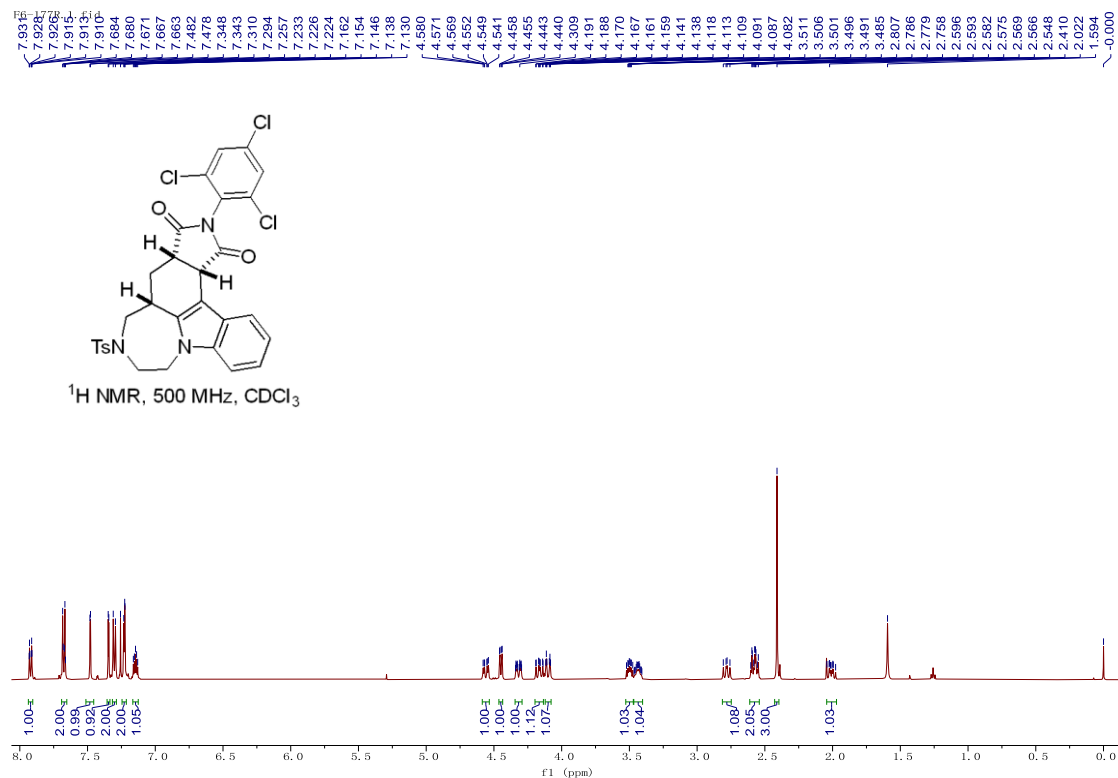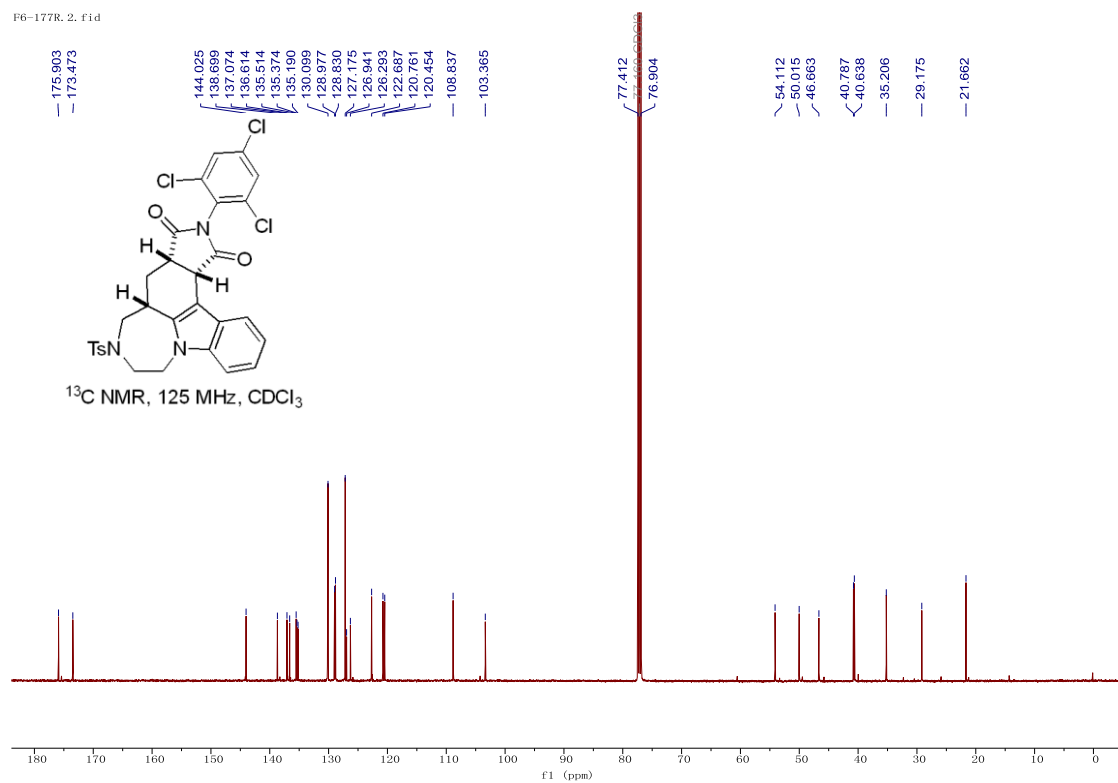

**13-bromo-2-(4-bromophenyl)-6-tosyl-3a,4,4a,5,6,7,8,13c-octahydro-1H-[1,4]diazepino[1,7,6-*lm*]pyrrolo[3,4-*c*]carbazole-1,3(2H)-dione (5k)**

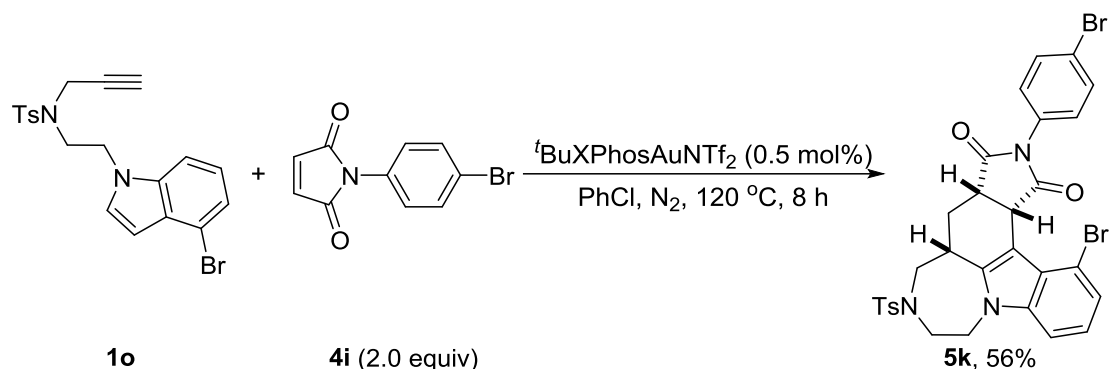

The compound **5k** (white solid, 38.2 mg, 56% yield) was obtained following General Procedure B from **1o** (43.1 mg, 0.1 mmol, 1.0 equiv) and **4i** (50.4 mg, 0.2 mmol, 2.0 equiv) using [*t*BuXPhosAuNTf<sub>2</sub>] (0.45 mg, 0.5 mol%) after purification by flash column chromatography using petroleum ether/DCM/THF = 8/4/1 (*R<sub>f</sub>* = 0.20) as eluent.

**<sup>1</sup>H NMR** (500 MHz, CDCl<sub>3</sub>, TMS)  $\delta$  7.66 (d, *J* = 8.5 Hz, 2H), 7.56-7.51 (m, 2H), 7.32-7.28 (m, 3H), 7.24-7.17 (m, 3H), 7.06-7.02 (m, 1H), 5.01 (d, *J* = 7.5 Hz, 1H), 4.53 (dd, *J* = 15.5, 5.5 Hz, 1H), 4.34-4.31 (m, 1H), 4.10-4.03 (m, 2H), 3.38-3.26 (m, 2H), 2.88-2.81 (m, 1H), 2.62-2.56 (m, 1H), 2.51-2.45 (m, 1H), 2.41 (s, 3H), 1.60-1.57 (m, 1H).

**<sup>13</sup>C NMR** (125 MHz, CDCl<sub>3</sub>)  $\delta$  176.7, 174.9, 144.2, 139.7, 138.3, 135.2, 132.3, 131.1, 130.2, 127.7, 127.2, 125.4, 124.9, 123.2, 122.1, 114.3, 108.4, 103.6, 53.7, 49.7, 47.0, 41.2, 40.4, 35.5, 30.3, 21.7.

**IR** (KBr)  $\nu$  (cm<sup>-1</sup>): 1716, 1632, 1596, 1491, 1382, 1324, 1163, 740, 549 cm<sup>-1</sup>.

**HRMS** (ESI): calcd for C<sub>30</sub>H<sub>25</sub>Br<sub>2</sub>N<sub>3</sub>NaO<sub>4</sub>S [M+Na]<sup>+</sup>: 703.98247, found: 703.98285.

**MP**: 245-247 °C.

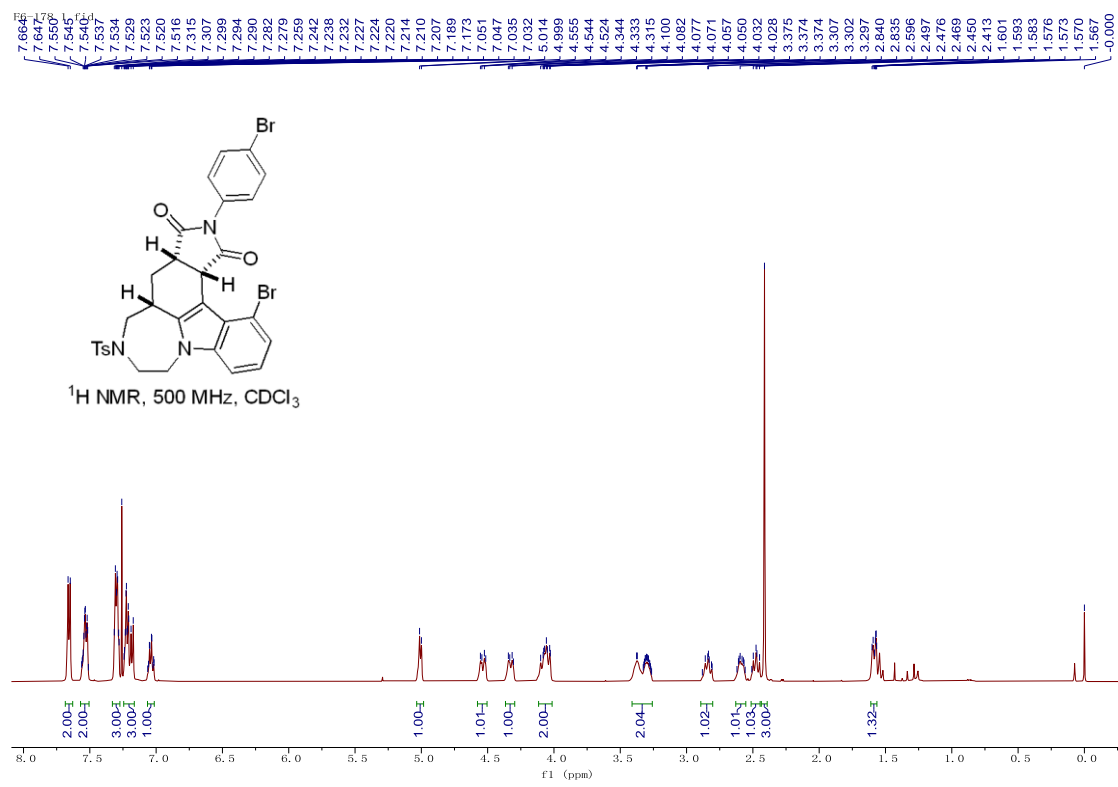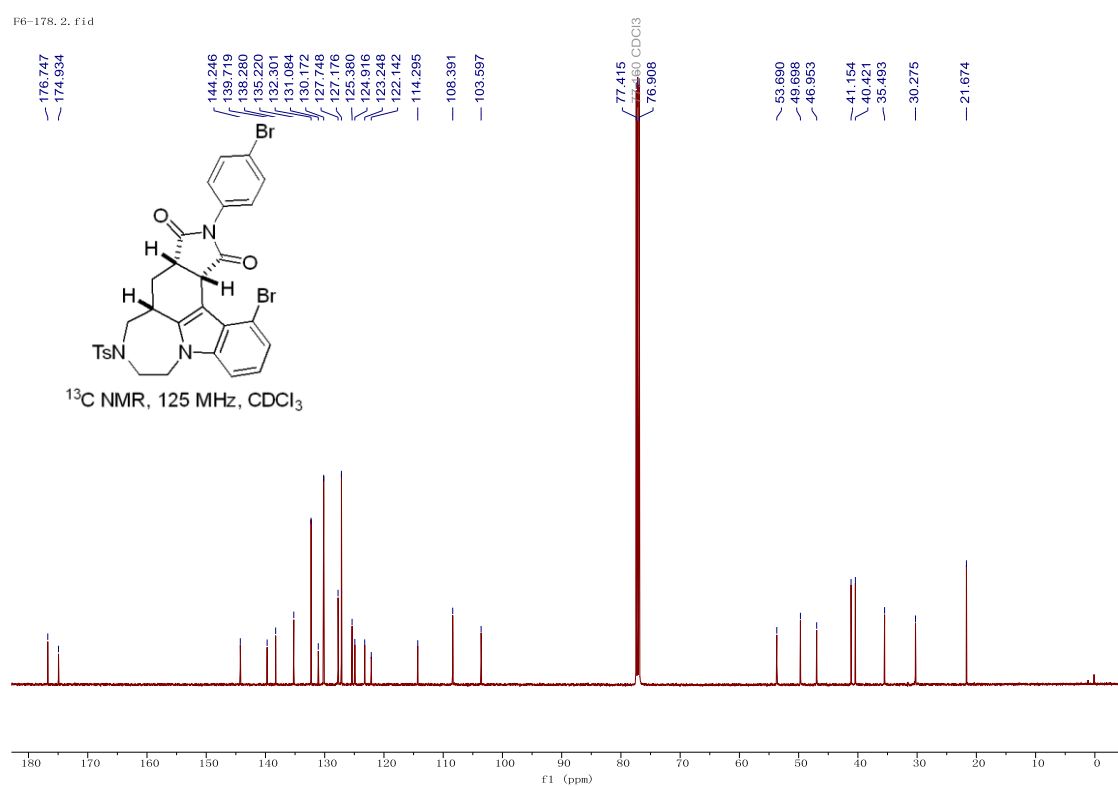

## 5. General Procedure for the Synthesis of 6

### 5.1 General Procedure C for 6a-f

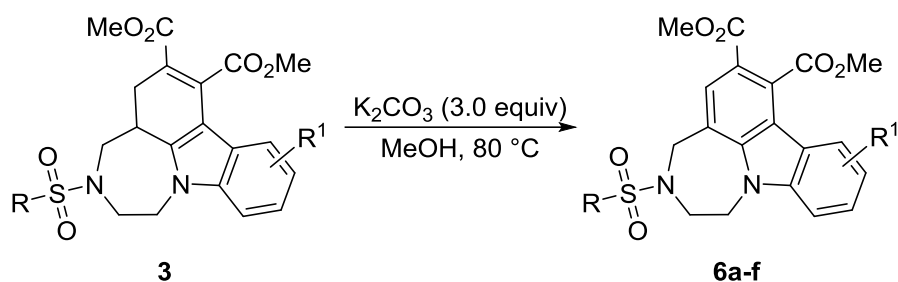

MeOH (1.0 mL) was added to a mixture of **3** (0.02-0.05 mmol, 1.0 equiv) and  $\text{K}_2\text{CO}_3$  (3.0 equiv). Then the reaction was stirred at 80 °C and was complete as monitored by TLC. The mixture was concentrated under vacuum and purified by flash column chromatography using petroleum ether/DCM/THF as eluent to give the desired product **6a-f**.

### Dimethyl 3-tosyl-1,2,3,4-tetrahydro-[1,4]diazepino[6,7,1-*jk*]carbazole-6,7-dicarbonylate (**6a**)

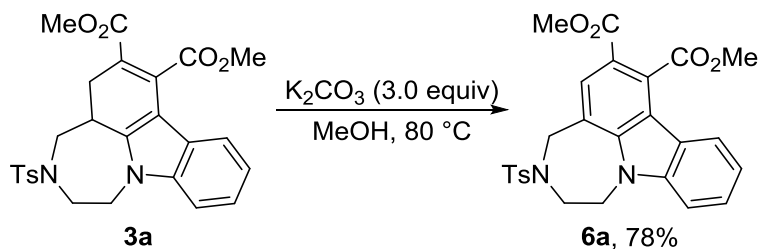

The compound **6a** (white solid, 19.2 mg, 78% yield) was obtained following General Procedure C from **3a** (24.7 mg, 0.05 mmol, 1.0 equiv), after purification by flash column chromatography using petroleum ether/DCM/THF = 8/4/1 ( $R_f = 0.20$ ) as eluent.

$^1\text{H NMR}$  (500 MHz,  $\text{CDCl}_3$ , TMS)  $\delta$  7.87 (s, 1H), 7.79 (d,  $J = 7.5$  Hz, 1H), 7.52-7.48 (m, 1H), 7.31-7.28 (m, 3H), 7.23 (t,  $J = 8.0$  Hz, 1H), 6.83 (d,  $J = 8.0$  Hz, 2H), 4.93 (s, 2H), 4.43-4.41 (m, 2H), 4.13 (s, 3H), 4.10-4.07 (m, 2H), 3.96 (s, 3H), 2.16 (s, 3H).

$^{13}\text{C NMR}$  (125 MHz,  $\text{CDCl}_3$ )  $\delta$  169.7, 166.3, 143.7, 142.3, 141.5, 135.5, 129.3, 129.2, 127.4, 126.8, 126.4, 121.6, 121.4, 121.1, 121.0, 120.6, 118.3, 109.2, 53.1, 52.6, 50.3, 49.5, 45.0, 21.4.

$\text{IR}$  (KBr)  $\nu$  ( $\text{cm}^{-1}$ ): 1732, 1717, 1443, 1339, 1269, 1231, 1157, 1138, 745  $\text{cm}^{-1}$ .

HRMS (ESI): calcd for C<sub>26</sub>H<sub>24</sub>N<sub>2</sub>NaO<sub>6</sub>S [M+Na]<sup>+</sup>: 515.12473, found: 515.12482.

MP: 195-198 °C.

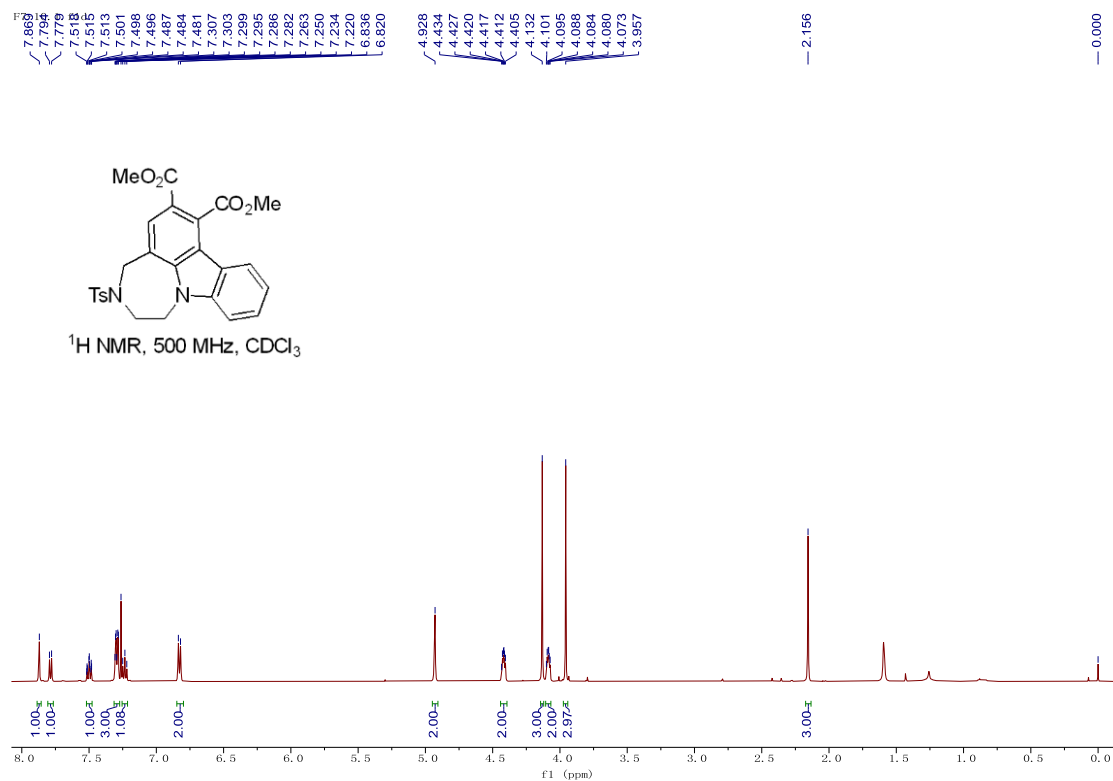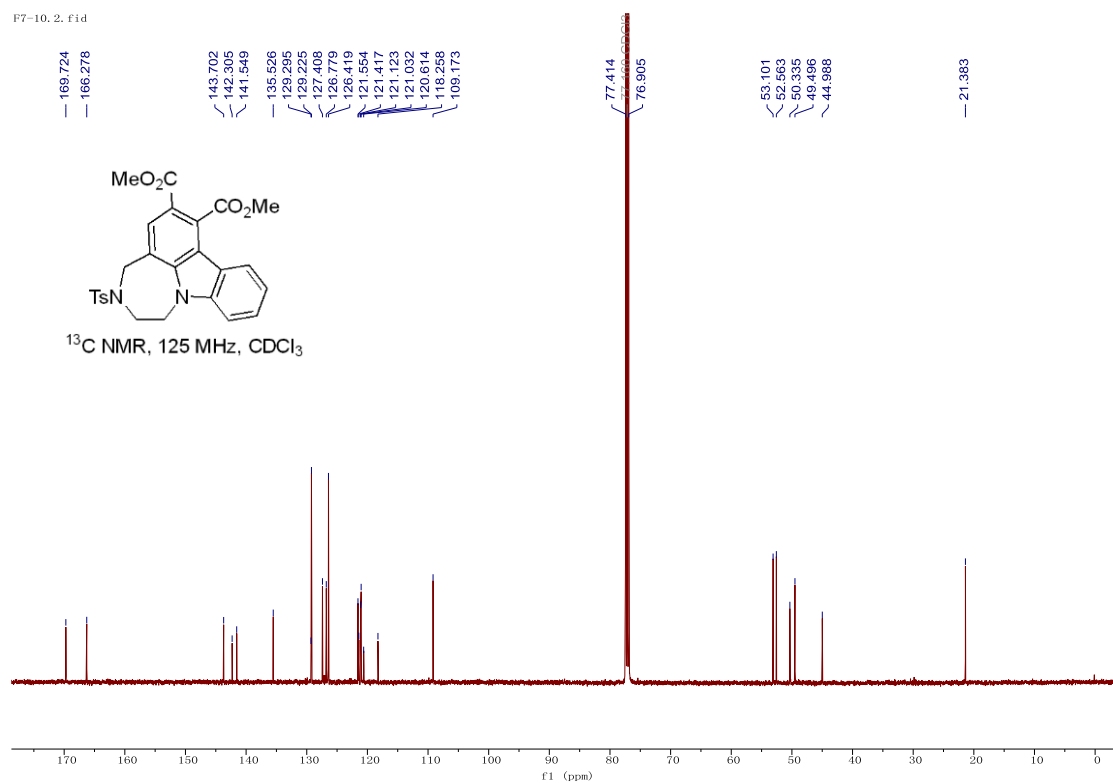

**Dimethyl 3-((4-bromophenyl)sulfonyl)-1,2,3,4-tetrahydro-[1,4]diazepino[6,7,1-*jk*]carbazole-6,7-dicarboxylate (6b)**

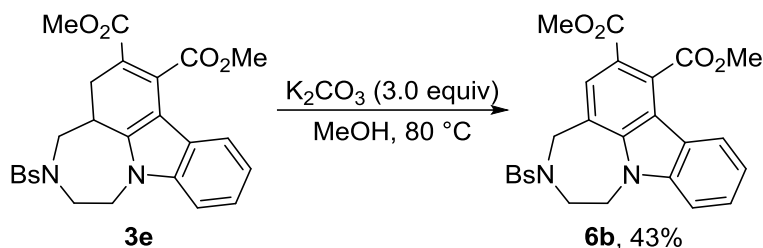

The compound **6b** (white solid, 12.4 mg, 43% yield) was obtained following General Procedure C from **3e** (28.0 mg, 0.05 mmol, 1.0 equiv), after purification by flash column chromatography using petroleum ether/DCM/THF = 8/4/1 ( $R_f$  = 0.19) as eluent.

$^1H$  NMR (500 MHz,  $CDCl_3$ , TMS)  $\delta$  7.87-7.86 (m, 1H), 7.82 (d,  $J$  = 8.0 Hz, 1H), 7.53-7.49 (m, 1H), 7.29-7.23 (m, 2H), 7.18-7.15 (m, 2H), 7.12-7.09 (m, 2H), 4.97 (s, 2H), 4.45-4.41 (m, 2H), 4.15 (s, 3H), 4.13-4.10 (m, 2H), 3.96 (s, 3H).

$^{13}C$  NMR (125 MHz,  $CDCl_3$ )  $\delta$  169.5, 166.2, 142.3, 141.3, 137.7, 131.7, 129.4, 127.73, 127.66, 127.57, 126.8, 122.0, 121.3, 121.2, 120.9, 120.6, 118.5, 108.9, 53.2, 52.6, 49.9, 49.7, 44.4.

IR (KBr)  $\nu$  ( $cm^{-1}$ ): 1732, 1713, 1339, 1273, 1234, 1227, 1165, 752  $cm^{-1}$ .

HRMS (ESI): calcd for  $C_{25}H_{21}BrN_2NaO_6S$   $[M+Na]^+$ : 579.01959, found: 579.01990.

MP: 197-200 °C.

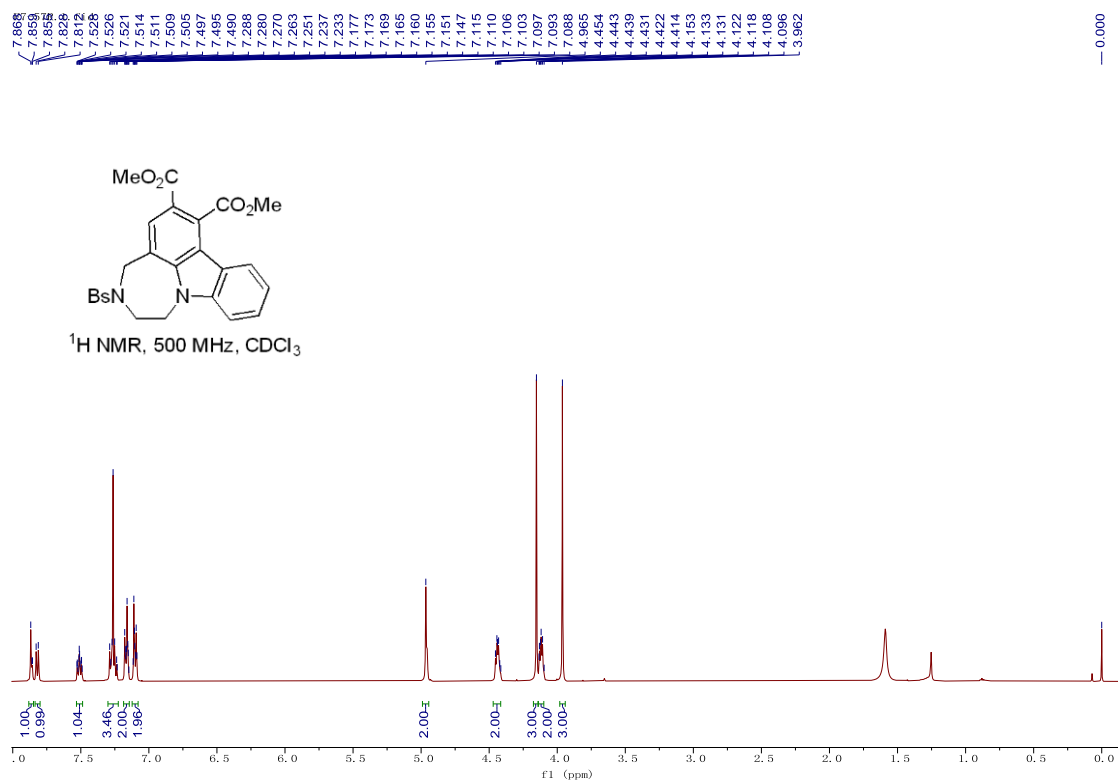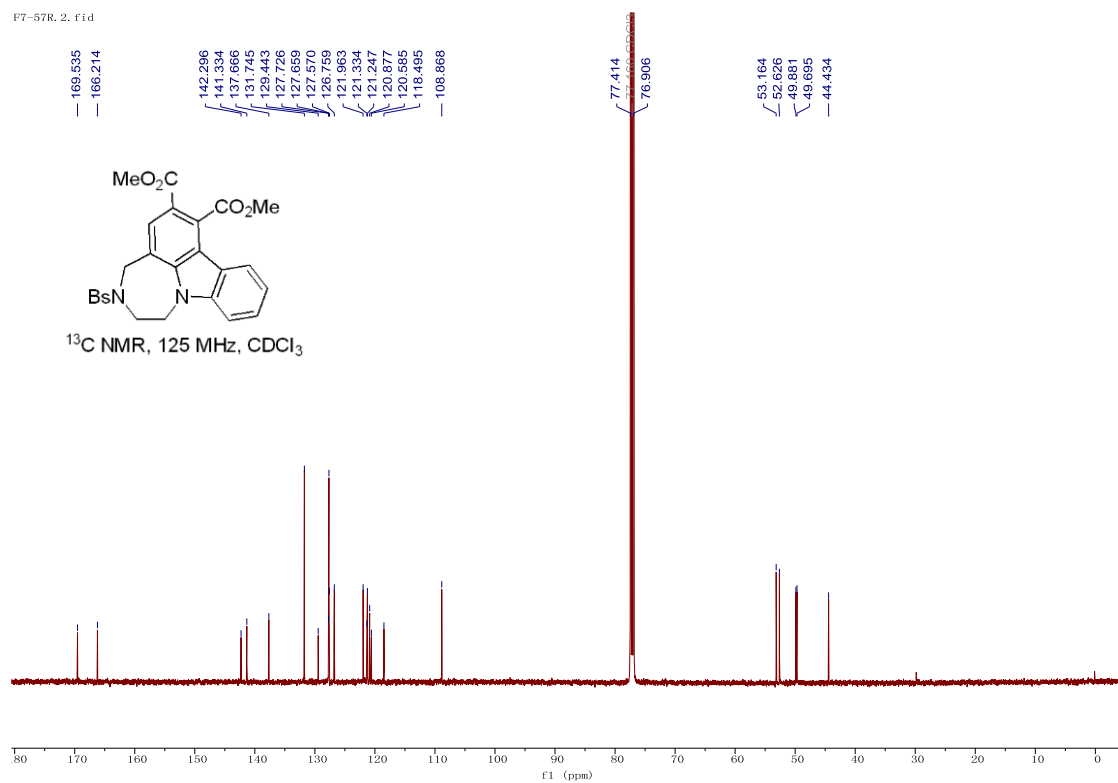

**dimethyl 3-(mesitylsulfonyl)-1,2,3,4-tetrahydro-[1,4]diazepino[6,7,1-*jk*]carbazole-6,7-dicarboxylate (6c)**

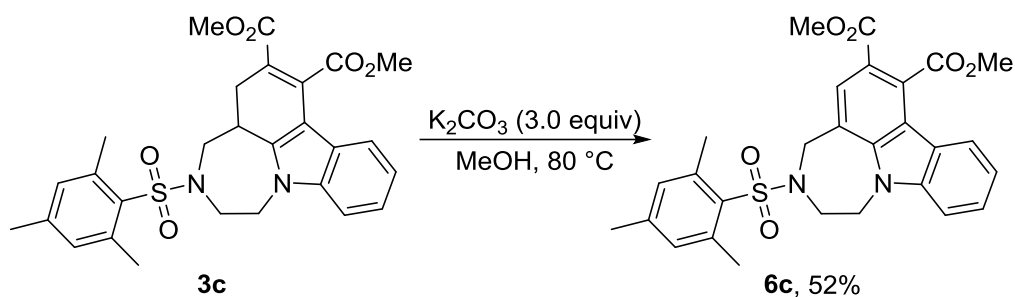

The compound **6c** (white solid, 13.6 mg, 52% yield) was obtained following General Procedure C from **3c** (26.1 mg, 0.05 mmol, 1.0 equiv), after purification by flash column chromatography using petroleum ether/DCM/THF = 8/4/1 ( $R_f$  = 0.30) as eluent.

**$^1H$  NMR** (500 MHz,  $CDCl_3$ , TMS)  $\delta$  7.89 (d,  $J$  = 8.0 Hz, 1H), 7.78 (s, 1H), 7.53-7.49 (m, 1H), 7.35 (d,  $J$  = 8.5 Hz, 1H), 7.28 (t,  $J$  = 8.0 Hz, 1H), 6.90 (s, 2H), 4.77 (s, 2H), 4.40-4.38 (m, 2H), 4.14 (s, 3H), 4.00-3.98 (m, 2H), 3.93 (s, 3H), 2.53 (s, 6H), 2.28 (s, 3H).

**$^{13}C$  NMR** (125 MHz,  $CDCl_3$ )  $\delta$  169.9, 166.3, 143.2, 142.3, 142.2, 140.5, 132.3, 131.9, 129.1, 127.4, 126.3, 122.2, 121.7, 121.6, 121.3, 121.1, 118.1, 109.7, 53.1, 52.5, 50.7, 48.0, 46.6, 23.0, 21.1.

**IR** (KBr)  $\nu$  ( $cm^{-1}$ ): 1732, 1721, 1327, 1315, 1269, 1227, 1146, 741  $cm^{-1}$ .

**HRMS** (ESI): calcd for  $C_{28}H_{28}N_2NaO_6S$   $[M+Na]^+$ : 543.15603, found: 543.15637.

**MP**: 210-212 °C.



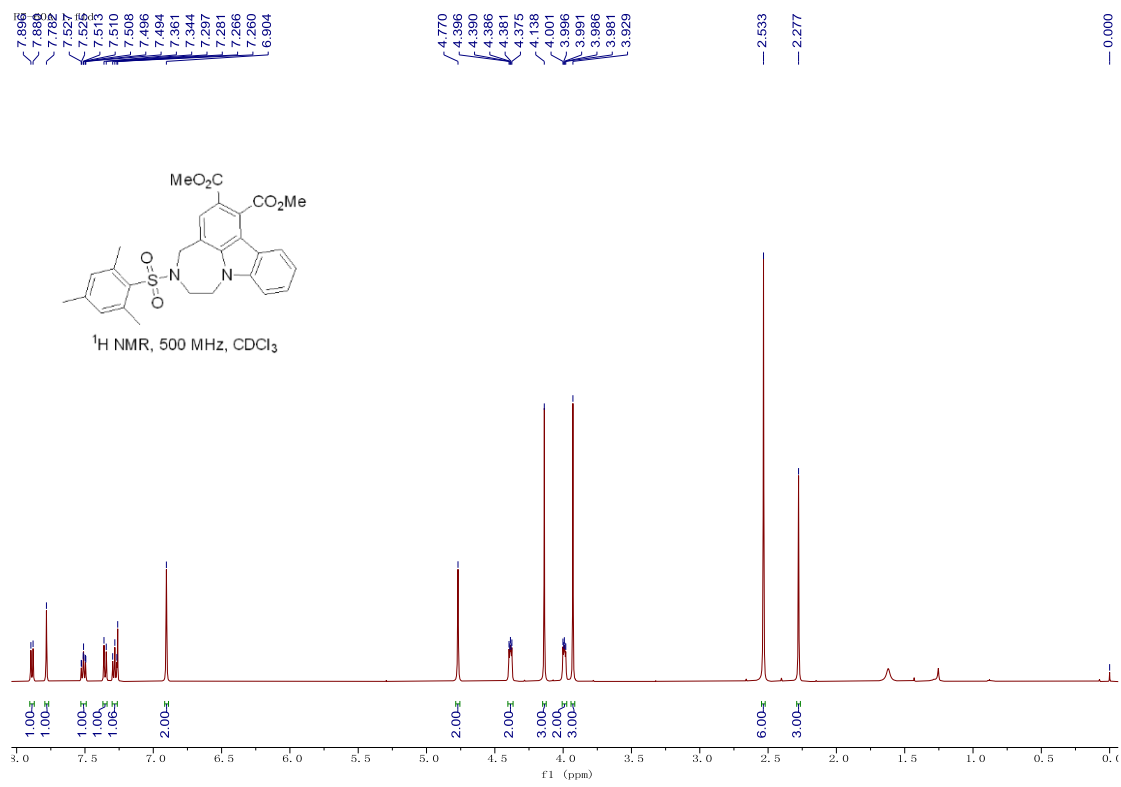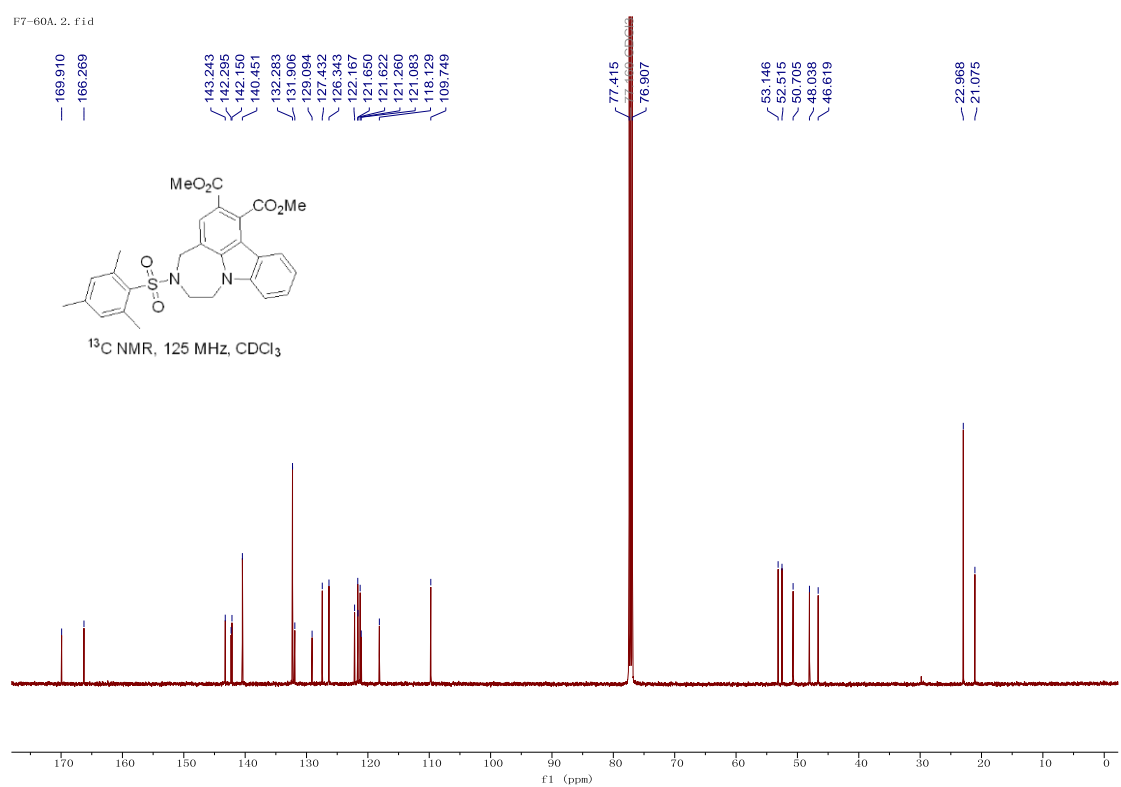

**dimethyl 8-methyl-3-tosyl-1,2,3,4-tetrahydro-[1,4]diazepino[6,7,1-*jk*]carbazole-6,7-dicarboxylate (6d)**

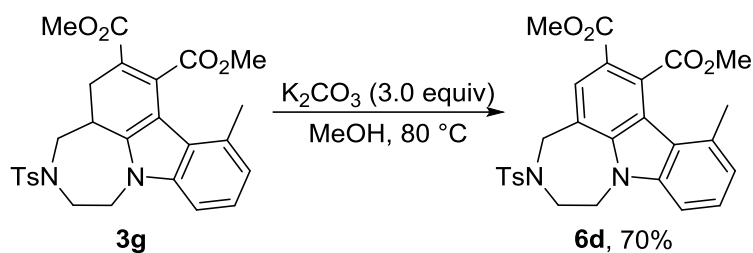

The compound **6d** (white solid, 14.3 mg, 70% yield) was obtained following General Procedure C from **3g** (21.8 mg, 0.04 mmol, 1.0 equiv), after purification by flash column chromatography using petroleum ether/DCM/THF = 8/4/1 ( $R_f = 0.27$ ) as eluent.

**$^1\text{H NMR}$**  (500 MHz,  $\text{CDCl}_3$ , TMS)  $\delta$  7.86 (d,  $J = 1.5$  Hz, 1H), 7.37-7.34 (m, 1H), 7.11-7.07 (m, 3H), 7.00 (d,  $J = 7.5$  Hz, 1H), 6.65 (d,  $J = 8.0$  Hz, 2H), 4.98 (d,  $J = 2.5$  Hz, 2H), 4.42-4.39 (m, 2H), 4.09-4.06 (m, 2H), 4.04 (s, 3H), 3.94 (s, 3H), 2.64 (s, 3H), 2.07 (s, 3H).

**$^{13}\text{C NMR}$**  (125 MHz,  $\text{CDCl}_3$ )  $\delta$  170.8, 166.6, 143.3, 143.0, 141.9, 135.3, 134.6, 130.8, 128.8, 127.4, 127.1, 126.1, 124.0, 121.0, 120.7, 120.0, 118.7, 106.3, 52.9, 52.5, 49.3, 48.6, 43.3, 22.0, 21.2.

**IR** (KBr)  $\nu$  ( $\text{cm}^{-1}$ ): 1724, 1562, 1342, 1277, 1250, 1207, 1157, 787  $\text{cm}^{-1}$ .

**HRMS** (ESI): calcd for  $\text{C}_{27}\text{H}_{26}\text{N}_2\text{NaO}_6\text{S}$   $[\text{M}+\text{Na}]^+$ : 529.14038, found: 529.14014.

**MP**: 157-160  $^\circ\text{C}$ .

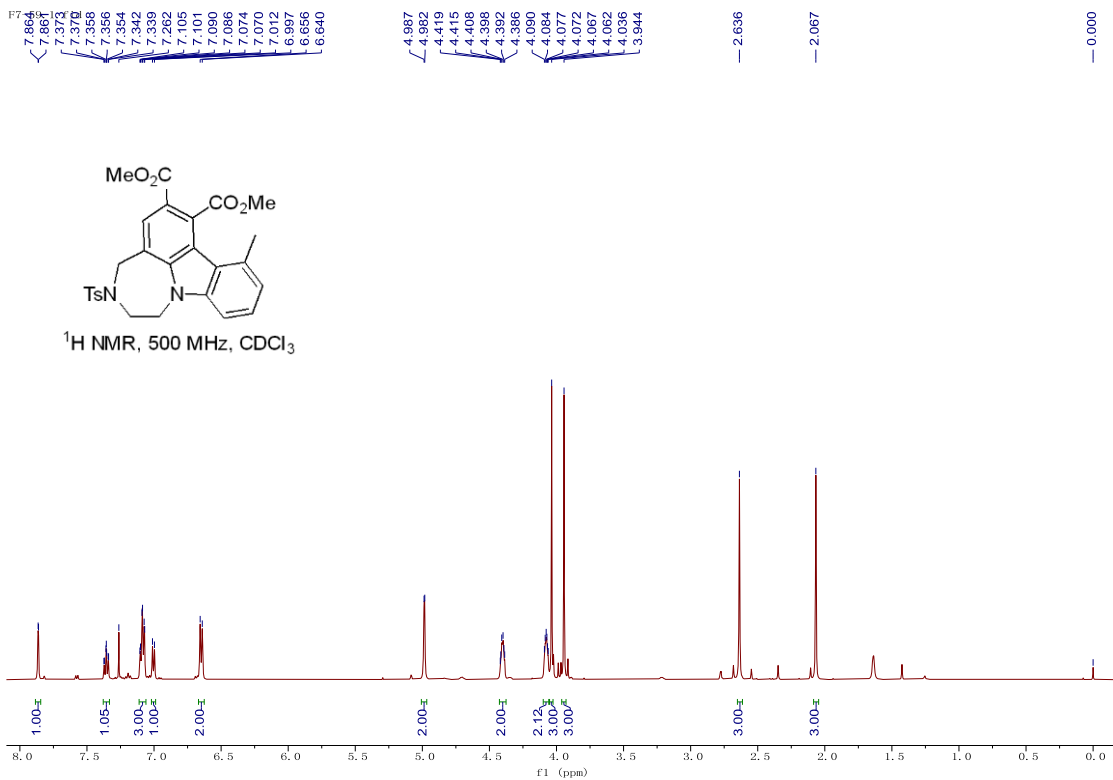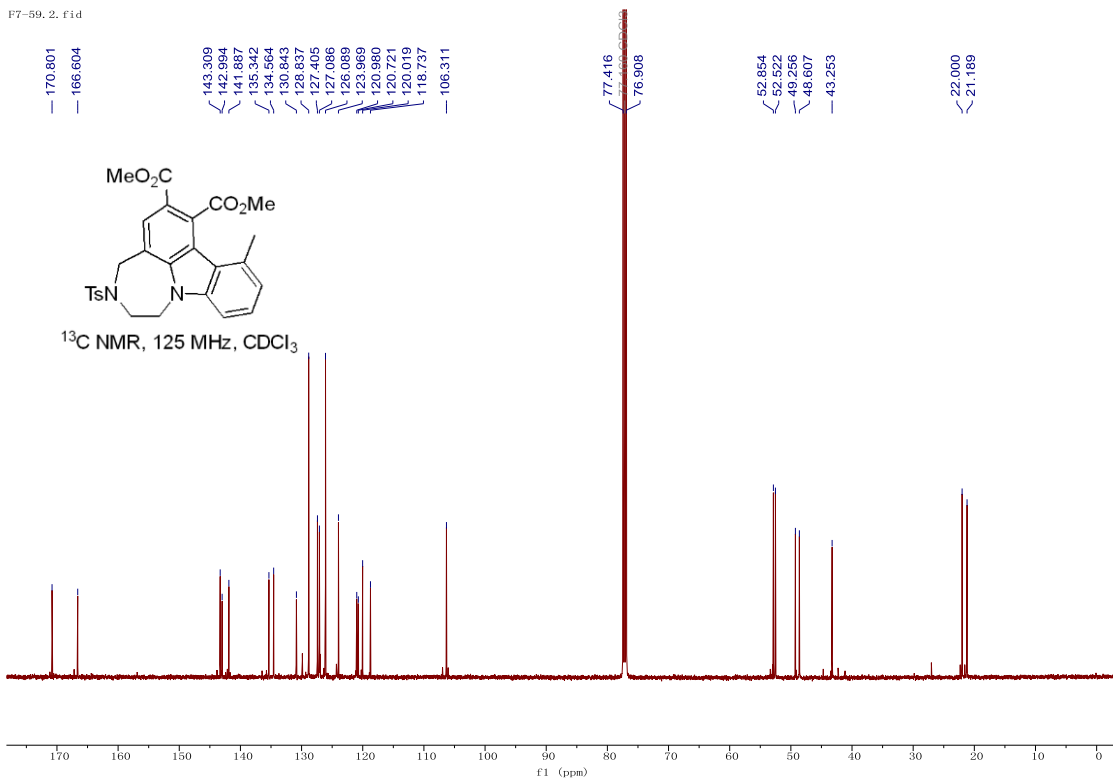

**dimethyl 11-methyl-3-tosyl-1,2,3,4-tetrahydro-[1,4]diazepino[6,7,1-*jk*]carbazole-6,7-dicarboxylate (6e)**

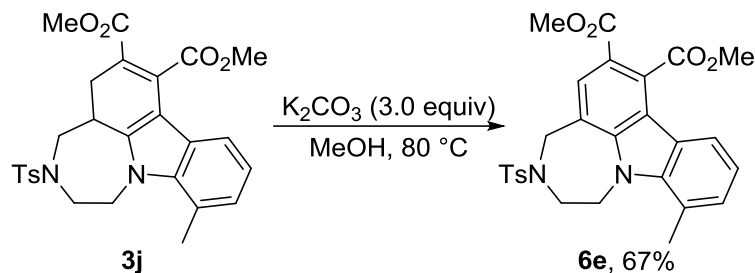

The compound **6e** (white solid, 10.2 mg, 67% yield) was obtained following General Procedure C from **3j** (15.2 mg, 0.03 mmol, 1.0 equiv), after purification by flash column chromatography using petroleum ether/DCM/THF = 8/4/1 ( $R_f = 0.22$ ) as eluent.

$^1\text{H NMR}$  (500 MHz,  $\text{CDCl}_3$ , TMS)  $\delta$  7.85 (s, 1H), 7.54 (d,  $J = 8.0$  Hz, 1H), 7.21 (d,  $J = 8.0$  Hz, 1H), 7.08 (t,  $J = 7.5$  Hz, 1H), 7.01 (d,  $J = 8.0$  Hz, 2H), 6.48 (d,  $J = 8.0$  Hz, 2H), 5.01 (s, 2H), 4.55 (t,  $J = 5.5$  Hz, 2H), 4.16 (t,  $J = 5.5$  Hz, 2H), 4.12 (s, 3H), 3.96 (s, 3H), 2.66 (s, 3H), 1.91 (s, 3H).

$^{13}\text{C NMR}$  (125 MHz,  $\text{CDCl}_3$ )  $\delta$  169.7, 166.3, 144.6, 143.4, 140.7, 135.4, 130.5, 129.2, 128.5, 127.1, 125.8, 122.4, 121.2, 121.0, 120.8, 120.5, 119.3, 118.8, 53.0, 52.6, 50.1, 48.4, 45.2, 21.1, 20.3.

**IR** (KBr)  $\nu$  ( $\text{cm}^{-1}$ ): 1732, 1701, 1339, 1273, 1231, 1227, 1157, 798  $\text{cm}^{-1}$ .

**HRMS** (ESI): calcd for  $\text{C}_{27}\text{H}_{26}\text{N}_2\text{NaO}_6\text{S}$   $[\text{M}+\text{Na}]^+$ : 529.14038, found: 529.14050.

**MP**: 192-195  $^\circ\text{C}$ .

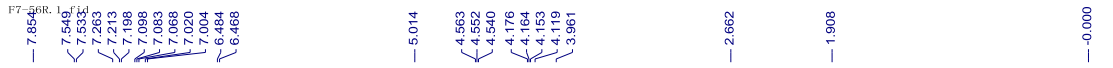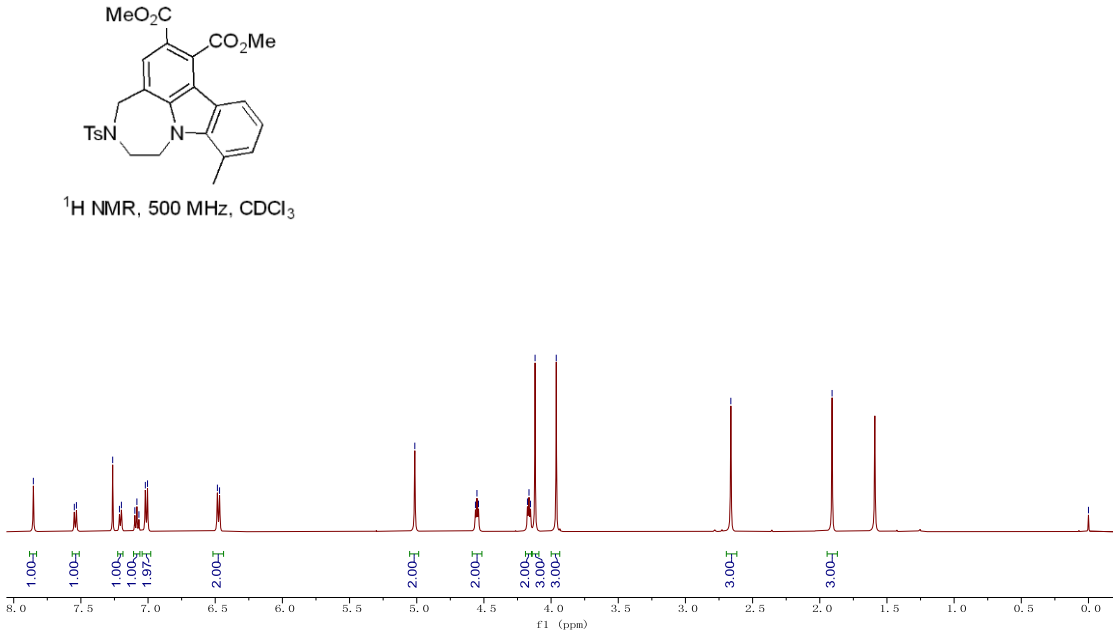

**dimethyl 8-bromo-3-tosyl-1,2,3,4-tetrahydro-[1,4]diazepino[6,7,1-jk]carbazole-6,7-dicarboxylate (6f)**

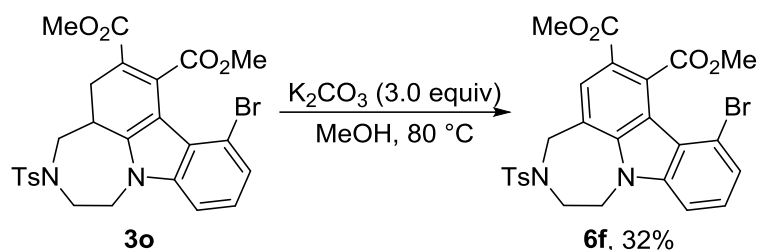

The compound **6f** (yellow solid, 9.1 mg, 32% yield) was obtained following General Procedure C from **3o** (28.7 mg, 0.05 mmol, 1.0 equiv), after purification by flash column chromatography using petroleum ether/DCM/THF = 8/4/1 ( $R_f$  = 0.18) as eluent.

$^1H$  NMR (500 MHz,  $CDCl_3$ , TMS)  $\delta$  7.86 (s, 1H), 7.47 (dd,  $J$  = 7.5, 1.0 Hz, 1H), 7.29 (t,  $J$  = 8.0 Hz, 1H), 7.23 (dd,  $J$  = 8.5, 1.5 Hz, 1H), 7.05 (dt,  $J$  = 8.0, 1.5 Hz, 2H), 6.64 (d,  $J$  = 8.0 Hz, 2H), 5.02 (s, 2H), 4.45 (t,  $J$  = 6.0 Hz, 2H), 4.12 (t,  $J$  = 6.0 Hz, 2H), 4.03 (s, 3H), 3.95 (s, 3H), 2.13 (s, 3H).

$^{13}C$  NMR (125 MHz,  $CDCl_3$ )  $\delta$  169.4, 166.8, 143.8, 142.85, 142.78, 135.3, 131.0, 128.9, 128.3, 127.6, 127.0, 126.0, 121.6, 120.5, 120.4, 119.0, 116.9, 107.7, 52.9, 52.7, 49.1, 48.4, 43.5, 21.4.

IR (KBr)  $\nu$  ( $cm^{-1}$ ): 1732, 1574, 1431, 1342, 1277, 1219, 1157, 914, 783  $cm^{-1}$ .

HRMS (ESI): calcd for  $C_{26}H_{23}BrN_2NaO_6S$   $[M+Na]^+$ : 593.03524, found: 593.03552.

MP: 187-190 °C.

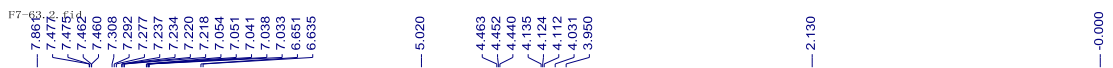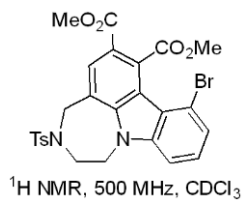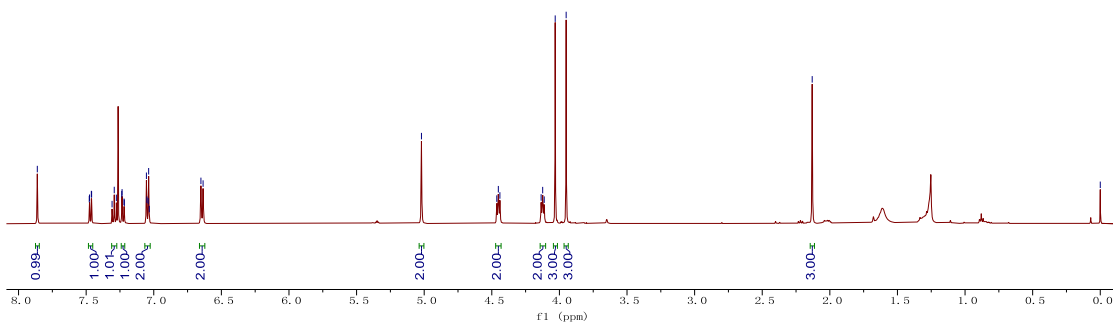

F7-63.3.fid

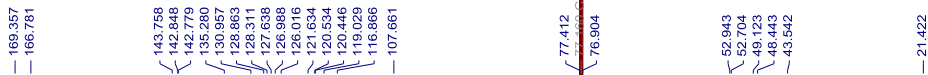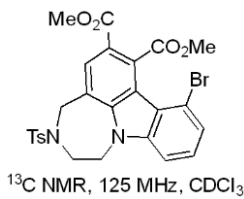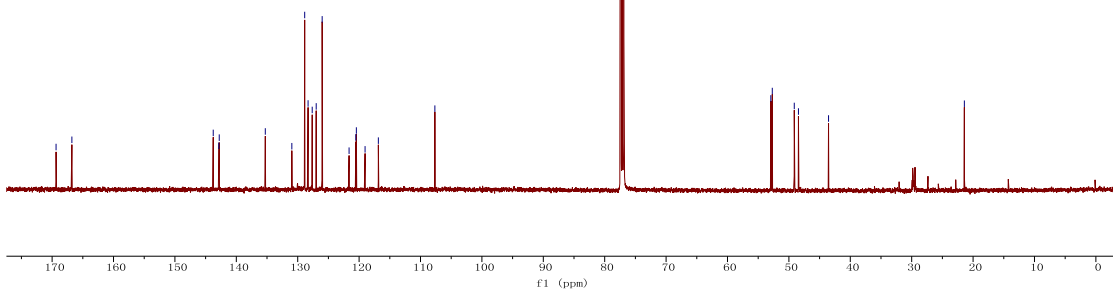

## 5.2 The Synthesis of 6g-h

### 2-ethyl-6-tosyl-5,6,7,8-tetrahydro-1*H*-[1,4]diazepino[1,7,6-*lm*]pyrrolo[3,4-*c*]carbazole-1,3(2*H*)-dione (6g)

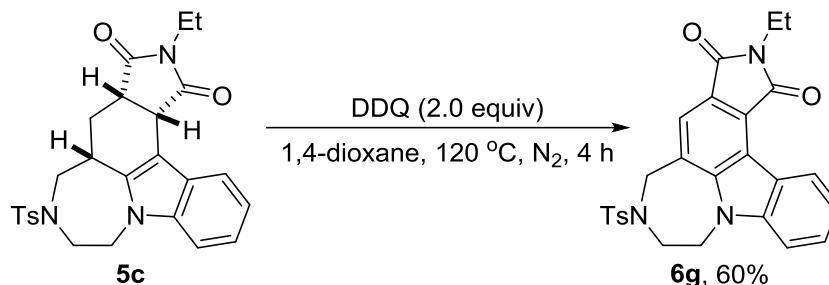

Under nitrogen atmosphere, 1,4-dioxane (1.0 mL) was added to a mixture of **5c** (37.7 mg, 0.08 mmol, 1.0 equiv) and DDQ (35.9 mg, 0.16 mmol, 2.0 equiv). Then the reaction was stirred at 120 °C for 4 h. The mixture was concentrated under vacuum and purified by flash column chromatography using petroleum ether/DCM/THF = 8/4/1 ( $R_f$  = 0.25) as eluent to give the desired product **6g** (yellow solid, 22.6 mg, 60% yield).

**<sup>1</sup>H NMR** (600 MHz, CDCl<sub>3</sub>, TMS)  $\delta$  8.92 (d,  $J$  = 7.8 Hz, 1H), 7.60-7.57 (m, 1H), 7.56 (s, 1H), 7.36-7.32 (m, 4H), 6.79 (d,  $J$  = 7.8 Hz, 2H), 4.95 (s, 2H), 4.48-4.46 (m, 2H), 4.12-4.10 (m, 2H), 3.78 (q,  $J$  = 7.2 Hz, 2H), 2.17 (s, 3H), 1.34 (t,  $J$  = 7.2 Hz, 3H).

**<sup>13</sup>C NMR** (150 MHz, CDCl<sub>3</sub>)  $\delta$  168.9, 168.8, 143.8, 143.7, 142.4, 135.7, 129.1, 128.7, 126.5, 125.9, 125.6, 125.1, 124.3, 121.4, 121.0, 120.7, 119.5, 108.9, 50.3, 49.6, 44.9, 33.0, 21.4, 14.3.

**IR** (KBr)  $\nu$  (cm<sup>-1</sup>): 1759, 1705, 1447, 1396, 1350, 1165, 748 cm<sup>-1</sup>.

**HRMS** (ESI): calcd for C<sub>26</sub>H<sub>23</sub>N<sub>3</sub>NaO<sub>4</sub>S [M+Na]<sup>+</sup>: 496.13015, found: 496.13007.

**MP**: 214-216 °C.



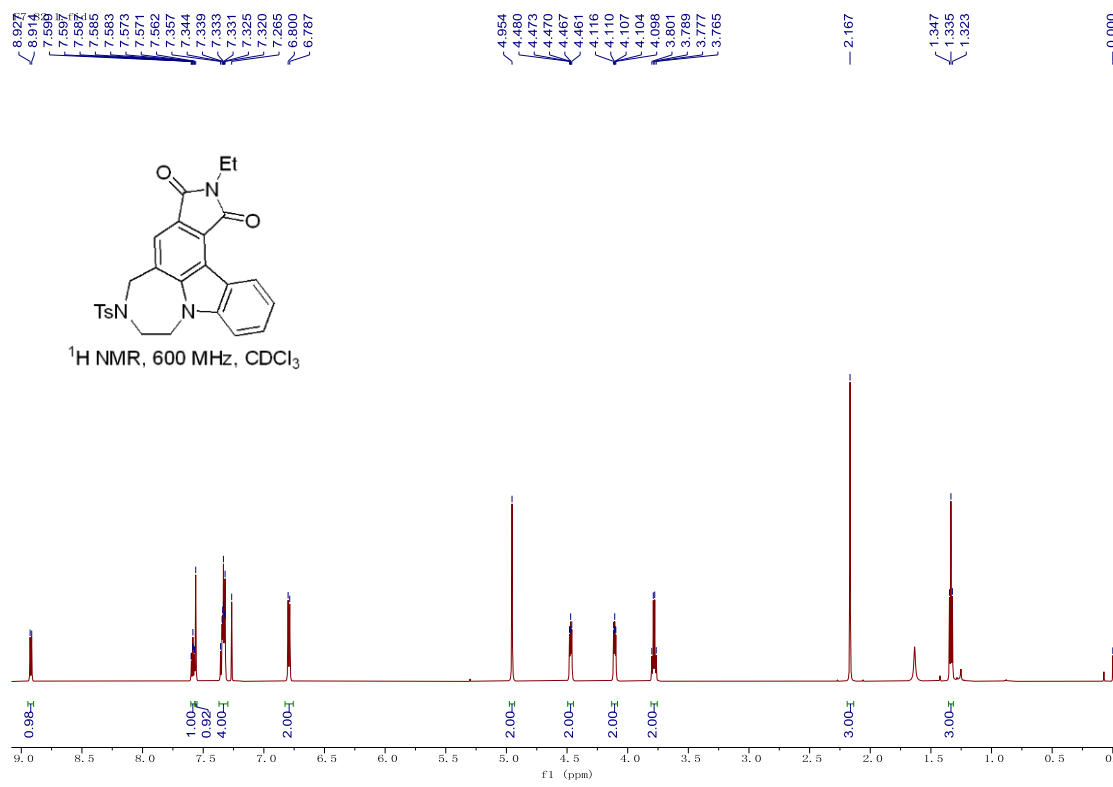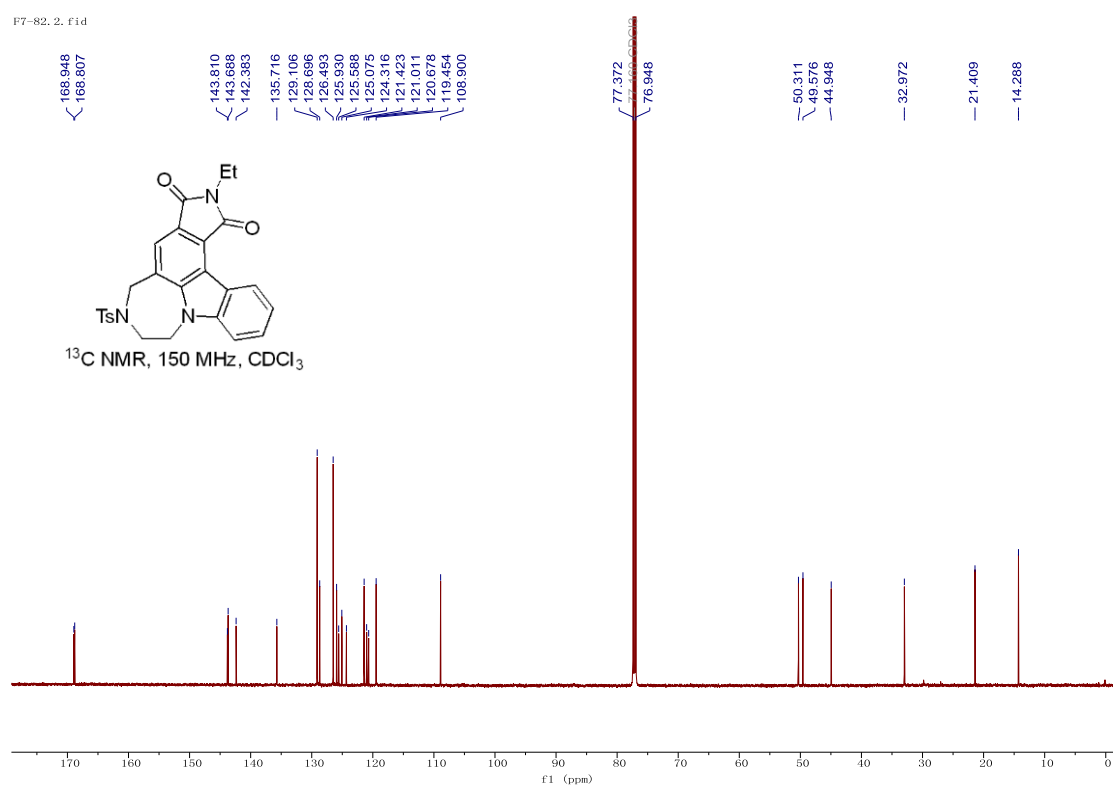

**2-(4-bromophenyl)-6-tosyl-5,6,7,8-tetrahydro-1*H*-[1,4]diazepino[1,7,6-*lm*]pyrrolo[3,4-*c*]carbazole-1,3(2*H*)-dione (6h)**

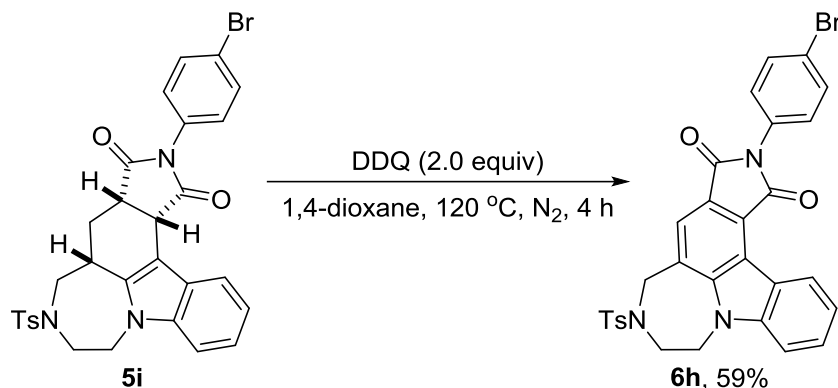

Under nitrogen atmosphere, 1,4-dioxane (1.0 mL) was added to a mixture of **5i** (30.0 mg, 0.05 mmol, 1.0 equiv) and DDQ (22.7 mg, 0.10 mmol, 2.0 equiv). Then the reaction was stirred at 120 °C for 4 h. The mixture was concentrated under vacuum and purified by flash column chromatography using petroleum ether/DCM/THF = 8/4/1 ( $R_f = 0.25$ ) as eluent to give the desired product **6h** (yellow solid, 17.6 mg, 59% yield).

**<sup>1</sup>H NMR** (600 MHz, CDCl<sub>3</sub>, TMS)  $\delta$  9.00 (d,  $J = 7.8$  Hz, 1H), 7.73 (s, 1H), 7.67 (dt,  $J = 9.0, 3.0$  Hz, 2H), 7.65-7.62 (m, 1H), 7.45 (dt,  $J = 8.4, 3.0$  Hz, 2H), 7.41-7.37 (m, 4H), 6.89 (d,  $J = 7.8$  Hz, 2H), 5.02 (s, 2H), 4.56-4.55 (m, 2H), 4.16-4.14 (m, 2H), 2.21 (s, 3H).

**<sup>13</sup>C NMR** (150 MHz, CDCl<sub>3</sub>)  $\delta$  167.64, 167.58, 144.3, 143.9, 142.6, 135.7, 132.4, 131.2, 129.3, 129.1, 128.1, 126.7, 126.2, 126.1, 125.0, 123.7, 121.8, 121.6, 121.2, 121.0, 120.0, 109.1, 50.5, 49.5, 45.2, 21.5.

**IR** (KBr)  $\nu$  (cm<sup>-1</sup>): 1767, 1709, 1489, 1366, 1350, 1342, 1161, 748 cm<sup>-1</sup>.

**HRMS** (ESI): calcd for C<sub>30</sub>H<sub>23</sub>BrN<sub>3</sub>O<sub>4</sub>S [M+H]<sup>+</sup>: 600.05872, found: 600.05908.

**MP**: 260-264 °C.

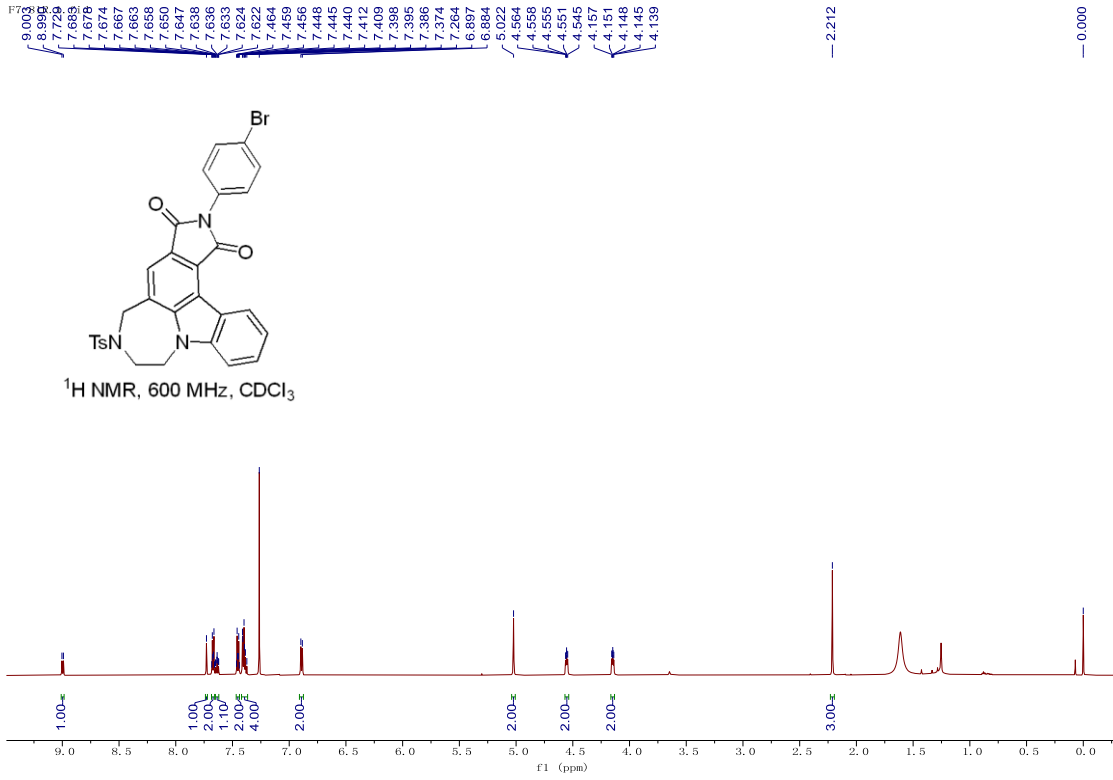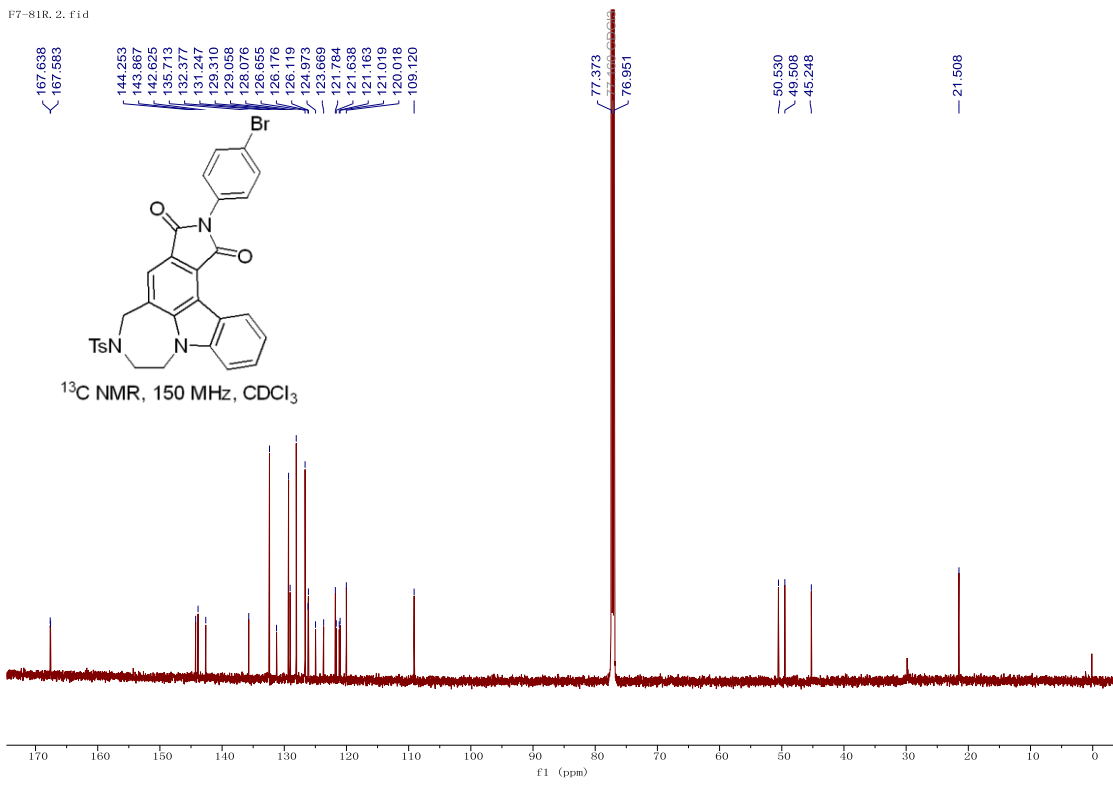

## 6. Scale-up Reaction Procedure

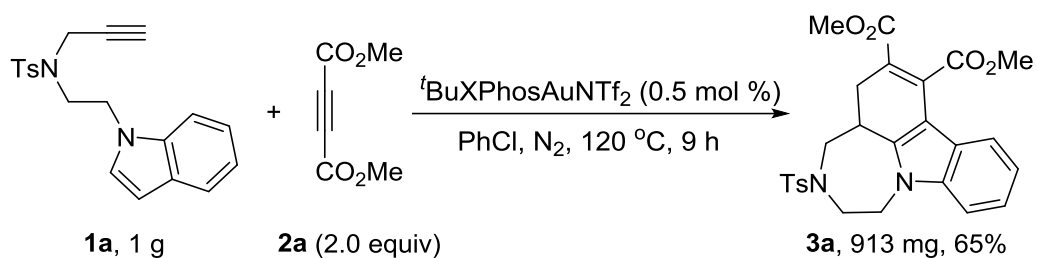

Under nitrogen atmosphere, anhydrous PhCl (30.0 mL) was added to a sealed tube which equipped with **1a** (1 g, 2.8 mmol, 1.0 equiv), **2a** (795.8 mg, 5.6 mmol, 2.0 equiv) and [<sup>t</sup>BuXPhosAuNTf<sub>2</sub>] (12.6 mg, 0.5 mol%). The mixture was stirred at 120 °C and was complete as monitored by TLC. The mixture was concentrated under vacuum and purified by flash column chromatography using petroleum ether/DCM/THF = 8/4/1 ( $R_f$  = 0.20) as eluent to afford **3a** (yellow solid, 913 mg, 65% yield).

## 7. Control Experiments

### 1-methylene-3-tosyl-2,3,4,5-tetrahydro-1*H*-[1,4]diazepino[1,7-*a*]indole (**D**)

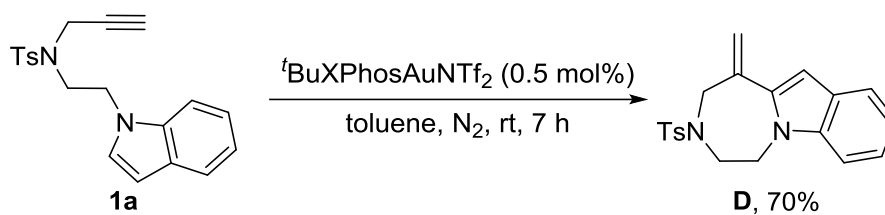

Under nitrogen atmosphere, anhydrous toluene (3.0 mL) was added to a sealed tube which equipped with the **1a** (176.2 mg, 0.5 mmol, 1.0 equiv) and [ $t\text{BuXPhosAuNTf}_2$ ] (2.25 mg, 0.5 mol%). The mixture was stirred at room temperature for 7 h. The mixture was concentrated under vacuum and purified by flash column chromatography using petroleum ether/EtOAc = 8/1 ( $R_f$  = 0.20) as eluent to afford **D** (yellow solid, 121.0 mg, 70% yield).

**$^1\text{H}$  NMR** (600 MHz,  $\text{CDCl}_3$ , TMS)  $\delta$  7.56 (d,  $J$  = 8.4 Hz, 2H), 7.43 (d,  $J$  = 7.8 Hz, 1H), 7.12-7.09 (m, 4H), 7.01-6.97 (m, 1H), 6.37 (s, 1H), 5.50 (s, 1H), 5.29 (s, 1H), 4.11-4.10 (m, 2H), 4.07 (s, 2H), 3.63-3.62 (m, 2H), 2.28 (s, 3H).

**$^{13}\text{C}$  NMR** (150 MHz,  $\text{CDCl}_3$ )  $\delta$  143.7, 140.9, 137.7, 136.3, 135.9, 129.8, 127.8, 127.2, 122.2, 120.8, 120.1, 119.5, 109.0, 102.0, 52.8, 48.7, 44.9, 21.6.

**IR** (KBr)  $\nu$  ( $\text{cm}^{-1}$ ): 1631, 1621, 1596, 1352, 1339, 1326, 1163, 1111, 794, 775, 740  $\text{cm}^{-1}$ .

**HRMS** (ESI): calcd for  $\text{C}_{20}\text{H}_{21}\text{N}_2\text{O}_2\text{S}$  [ $\text{M}+\text{H}$ ] $^+$ : 353.13183, found: 353.13174.

**MP**: 143-145  $^\circ\text{C}$ .

7.5627, 7.5489, 7.5407, 7.427, 7.123, 7.110, 7.093, 7.001, 6.994, 6.987, 6.981, 6.974, 6.370, 5.501, 5.293, 4.113, 4.109, 4.105, 4.100, 4.096, 4.074, 3.634, 3.631, 3.626, 3.621, 3.616, 2.282, -0.000

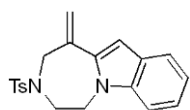

<sup>1</sup>H NMR, 600 MHz, CDCl<sub>3</sub>

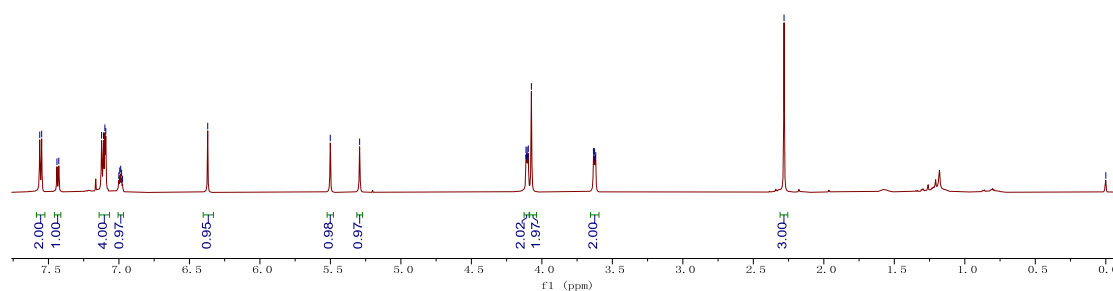

F6-190.2.fid

143.702, 140.914, 137.683, 136.279, 135.888, 129.810, 127.768, 127.234, 122.216, 120.771, 120.096, 119.522, 108.999, 101.981, 77.374, 77.163, 76.950, 52.839, 48.710, 44.938, 21.563

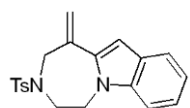

<sup>13</sup>C NMR, 150 MHz, CDCl<sub>3</sub>

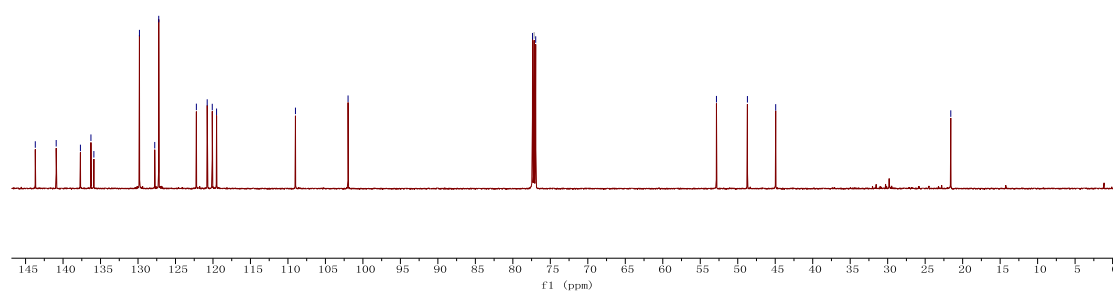

### 1-methyl-3-tosyl-4,5-dihydro-3H-[1,4]diazepino[1,7-a]indole (**E**)

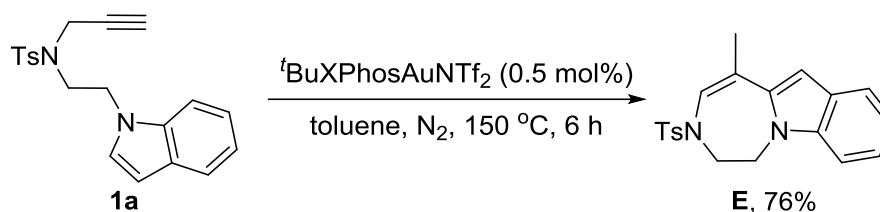

Under nitrogen atmosphere, anhydrous toluene (3.0 mL) was added to a sealed tube which equipped with the **1a** (176.2 mg, 0.5 mmol, 1.0 equiv) and [<sup>t</sup>BuXPhosAuNTf<sub>2</sub>] (2.25 mg, 0.5 mol%). The mixture was stirred at 150 °C for 6 h. The mixture was concentrated under vacuum and purified by flash column chromatography using petroleum ether/EtOAc = 15/1 (*R<sub>f</sub>* = 0.26) as eluent to afford **E** (red solid, 133.4 mg, 76% yield).

**<sup>1</sup>H NMR** (500 MHz, CDCl<sub>3</sub>, TMS) δ 7.71 (dt, *J* = 8.5, 2.0 Hz, 2H), 7.54 (dt, *J* = 8.0, 1.0 Hz, 1H), 7.30 (d, *J* = 8.0 Hz, 2H), 7.18-7.14 (m, 2H), 7.07-7.04 (m, 1H), 6.80 (d, *J* = 1.0 Hz, 1H), 6.47 (s, 1H), 4.15-4.13 (m, 2H), 3.92-3.91 (m, 2H), 2.40 (s, 3H), 2.18 (d, *J* = 1.0 Hz, 3H).

**<sup>13</sup>C NMR** (125 MHz, CDCl<sub>3</sub>) δ 144.4, 137.5, 135.8, 130.2, 127.5, 127.0, 122.1, 121.4, 120.7, 119.9, 108.7, 108.4, 102.1, 47.4, 44.9, 22.2, 21.7.

**IR** (KBr)  $\nu$  (cm<sup>-1</sup>): 1636, 1366, 1335, 1165, 1107, 1053, 918, 664 cm<sup>-1</sup>.

**HRMS** (ESI): calcd for C<sub>20</sub>H<sub>21</sub>N<sub>2</sub>O<sub>2</sub>S [M+H]<sup>+</sup>: 353.13183, found: 353.13162.

**MP**: 65-68 °C.

7.727  
7.722  
7.718  
7.709  
7.706  
7.704  
7.551  
7.549  
7.535  
7.533  
7.531  
7.511  
7.505  
7.475  
7.473  
7.158  
7.153  
7.153  
7.148  
7.146  
7.136  
7.072  
7.066  
7.061  
7.056  
7.050  
7.046  
7.040  
6.799  
6.796  
6.473  
4.145  
4.143  
4.136  
4.130  
4.128  
3.920  
3.912  
3.905

-2.395  
-2.179  
-2.177

-0.000

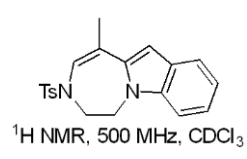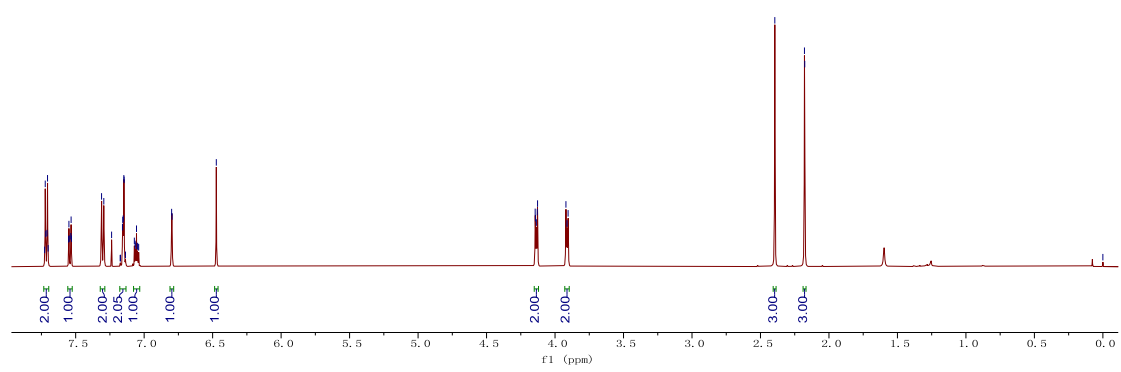

F7-100.2.f1d

144.412  
137.509  
135.787  
130.226  
127.536  
126.992  
122.118  
121.441  
120.708  
119.949  
108.672  
108.391  
102.145

77.415  
77.160 CDCl<sub>3</sub>  
76.907

47.355  
44.899

22.161  
21.682

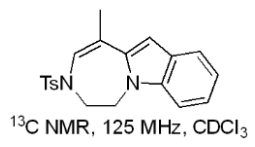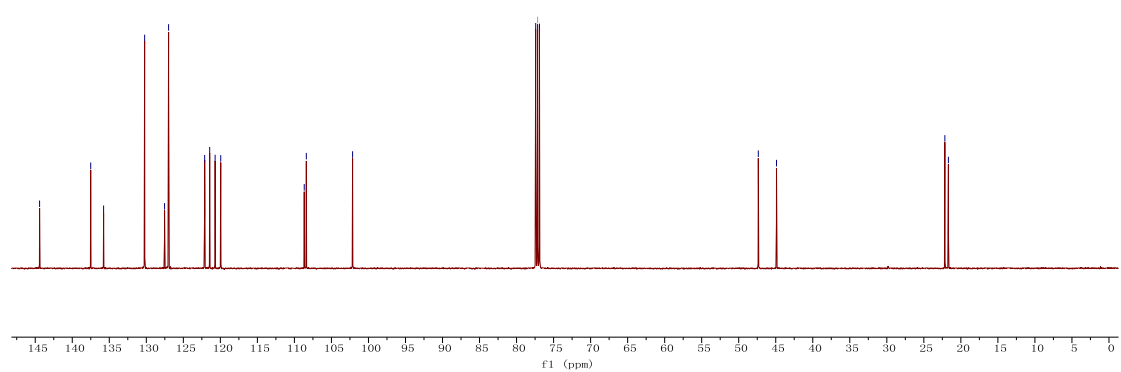



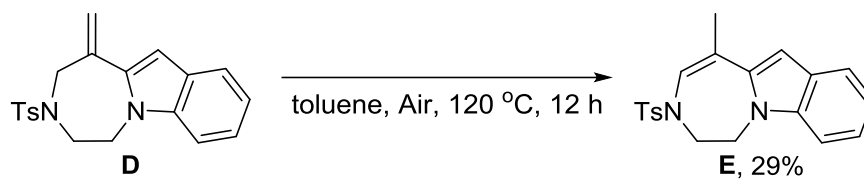

Under air atmosphere, a sealed tube was equipped with **D** (17.6 mg, 0.05 mmol, 1.0 equiv) and anhydrous toluene (1.0 mL). The mixture was stirred at 120 °C for 12 h. Then the mixture was concentrated under vacuum. The *in-situ* yield of product **E** was determined by  $^1\text{H}$  NMR analysis by using  $\text{CH}_2\text{Br}_2$  as an internal standard.

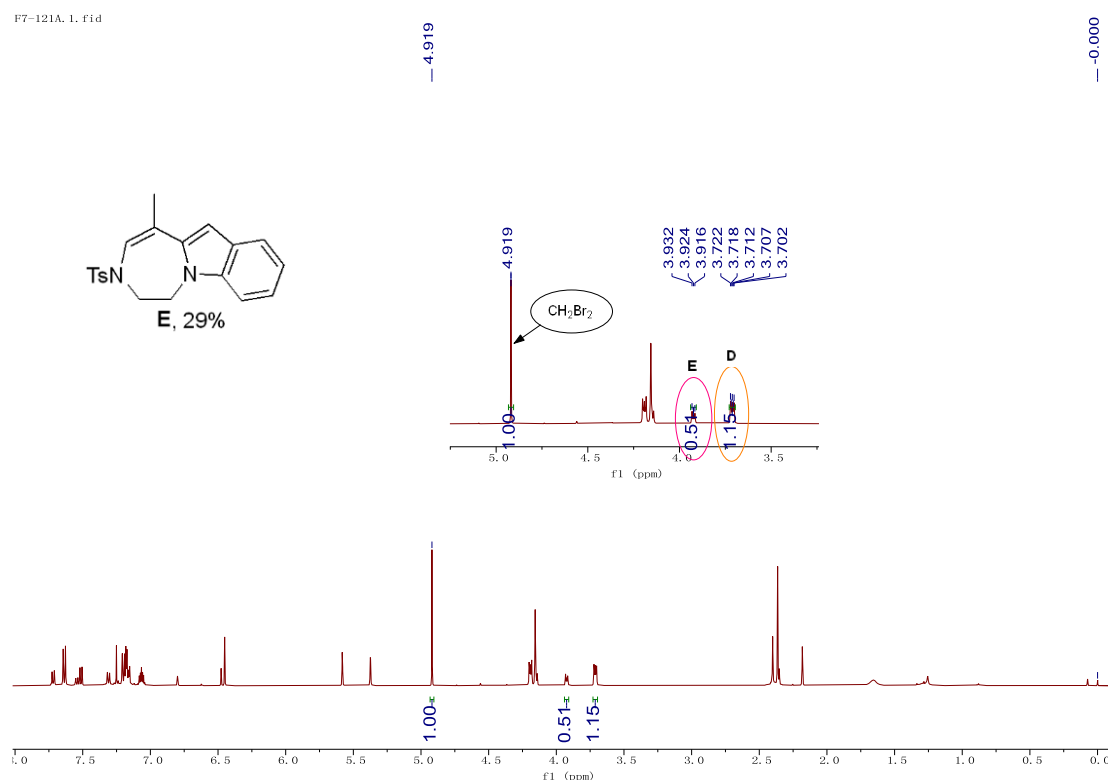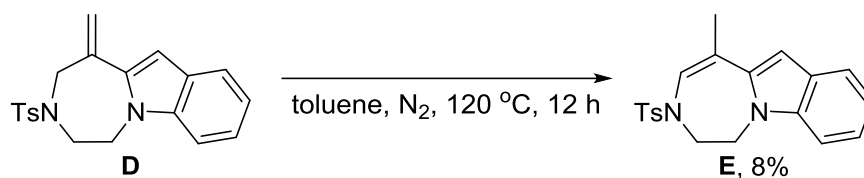

Under nitrogen atmosphere, anhydrous toluene (1.0 mL) was added to a sealed tube which equipped with **D** (17.6 mg, 0.05 mmol, 1.0 equiv). The mixture was stirred at 120 °C for 12 h. Then the mixture was concentrated under vacuum. The *in-situ* yield of product **E** was determined by  $^1\text{H}$  NMR analysis by using  $\text{CH}_2\text{Br}_2$  as an internal standard.

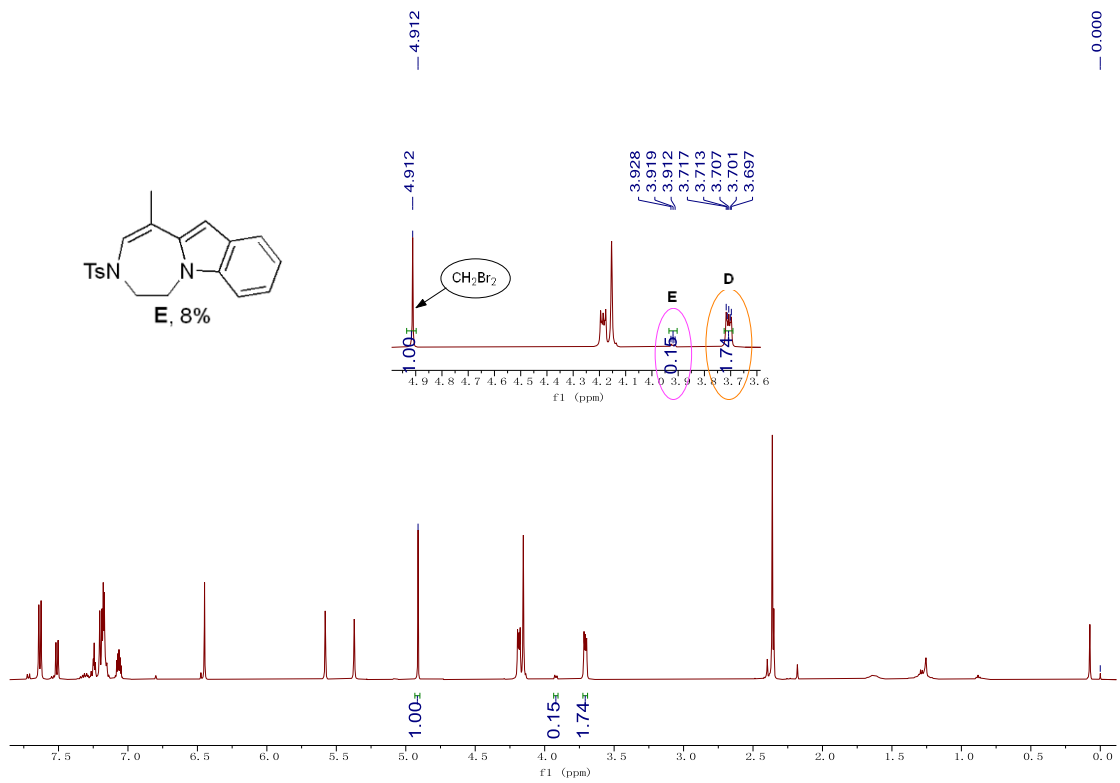

## 8. X-ray Crystal Data of Compound 5k.

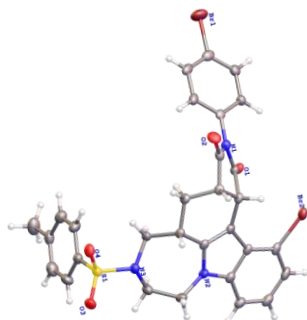

The crystal data of **5k** have been deposited in CCDC with number 2281024.

**Table 1 Crystal data and structure refinement for 5k.**

|                                             |                                                                                 |
|---------------------------------------------|---------------------------------------------------------------------------------|
| Empirical formula                           | C <sub>30</sub> H <sub>25</sub> Br <sub>2</sub> N <sub>3</sub> O <sub>4</sub> S |
| Formula weight                              | 683.41                                                                          |
| Temperature/K                               | 170.00(10)                                                                      |
| Crystal system                              | monoclinic                                                                      |
| Space group                                 | I2/a                                                                            |
| a/Å                                         | 20.8975(8)                                                                      |
| b/Å                                         | 9.0370(2)                                                                       |
| c/Å                                         | 31.2449(14)                                                                     |
| α/°                                         | 90                                                                              |
| β/°                                         | 108.922(5)                                                                      |
| γ/°                                         | 90                                                                              |
| Volume/Å <sup>3</sup>                       | 5581.8(4)                                                                       |
| Z                                           | 8                                                                               |
| ρ <sub>calc</sub> /cm <sup>3</sup>          | 1.626                                                                           |
| μ/mm <sup>-1</sup>                          | 4.732                                                                           |
| F(000)                                      | 2752.0                                                                          |
| Crystal size/mm <sup>3</sup>                | 0.15 × 0.12 × 0.09                                                              |
| Radiation                                   | Cu Kα (λ = 1.54184)                                                             |
| 2θ range for data collection/°              | 5.98 to 147.768                                                                 |
| Index ranges                                | -25 ≤ h ≤ 25, -6 ≤ k ≤ 11, -36 ≤ l ≤ 38                                         |
| Reflections collected                       | 18816                                                                           |
| Independent reflections                     | 5534 [R <sub>int</sub> = 0.1078, R <sub>sigma</sub> = 0.1047]                   |
| Data/restraints/parameters                  | 5534/0/362                                                                      |
| Goodness-of-fit on F <sup>2</sup>           | 1.026                                                                           |
| Final R indexes [I ≥ 2σ (I)]                | R <sub>1</sub> = 0.0558, wR <sub>2</sub> = 0.1267                               |
| Final R indexes [all data]                  | R <sub>1</sub> = 0.0889, wR <sub>2</sub> = 0.1434                               |
| Largest diff. peak/hole / e Å <sup>-3</sup> | 0.79/-0.82                                                                      |

**Crystal Data for 5k:** C<sub>30</sub>H<sub>25</sub>Br<sub>2</sub>N<sub>3</sub>O<sub>4</sub>S (*M* = 683.41 g/mol): monoclinic, space group I2/a (no. 15), *a* = 20.8975(8) Å, *b* = 9.0370(2) Å, *c* = 31.2449(14) Å, *β* = 108.922(5)°, *V* = 5581.8(4) Å<sup>3</sup>, *Z* = 8, *T* = 170.00(10) K, *μ*(Cu Kα) = 4.732 mm<sup>-1</sup>, *D*<sub>calc</sub> = 1.626 g/cm<sup>3</sup>, 18816 reflections measured (5.98 ≤ 2 $\Theta$  ≤ 147.768), 5534 unique (*R*<sub>int</sub> = 0.1078, *R*<sub>sigma</sub> = 0.1047) which were used in all calculations. The final *R*<sub>1</sub> was 0.0558 (*I* > 2 $\sigma$ (*I*)) and *wR*<sub>2</sub> was 0.1434 (all data).

## 9. References

- [1] A. A. Wilkinson, E. Jagu, K. Ubych, S. Coulthard, A. E. Rushton, J. Kennefick, Q. Su, R. K. Neely and P. Fernandez-Trillo, *ACS Cent. Sci.*, 2020, **6**, 525–534.
- [2] J.-M. Yang, M.-L. Yao, J.-C. Li, J.-K. Liu and B. Wu, *Org. Lett.*, 2022, **24**, 6505–6509.
- [3] M. Feofanov, D. I. Sharapa and V. Akhmetov, *Green Chem.*, 2022, **24**, 4761–4765.
